1 **QTL and genetic analysis controlling fiber quality traits using**  
2 **paternal backcross population in Upland Cotton**

3

4 **Lingling Ma<sup>1</sup>, Ying Su<sup>1</sup>, Yumei Wang<sup>2</sup>, Hushai Nie<sup>1</sup>, Yupeng Cui<sup>1</sup>, Cheng**  
5 **Cheng<sup>1</sup>, Meiyang Wang<sup>1</sup>, Jinping Hua<sup>1,\*</sup>**

6

7 <sup>1</sup> Laboratory of Cotton Genetics, Genomics and Breeding /Beijing Key Laboratory of Crop  
8 Genetic Improvement /Key Laboratory of Crop Heterosis and Utilization of Ministry of Education,  
9 College of Agronomy and Biotechnology, China Agricultural University, Beijing 100193, China

10 <sup>2</sup> Institute of Cash Crops, Hubei Academy of Agricultural Sciences, Wuhan 430064, Hubei, China

11

12 \* Corresponding author: College of Agronomy and Biotechnology, China Agricultural University,  
13 Beijing 100193, China. E-mail: jinping\_hua@cau.edu.cn

14

15 **ABSTRACT**

16

17 In present study, F<sub>14</sub> recombinant inbred line (RIL) population was backcrossed to  
18 paternal parent for a paternal backcross (BC/P) population, deriving from one Upland  
19 cotton hybrid. Three repetitive BC/P field trials and one BC/M field trial were  
20 performed including both two BC populations and the original RIL population. Totally,  
21 for fiber quality traits, 24 novel QTLs were detected and 13 QTLs validated previous  
22 results. And 19 quantitative trait loci (QTL) in BC/P populations explained 5.01% -  
23 22.09% of phenotype variation (PV). Among the 19 QTLs, three QTLs were detected  
24 simultaneously in BC/M population. The present study provided novel alleles of male

25 parent for fiber quality traits with positive genetic effects. Particularly, *qFS-Chr3-1*  
26 controlling fiber strength explained 22.09% of PV in BC/P population, which  
27 increased 0.48 cN/tex for fiber strength. A total of seven, two, eight, two and six  
28 QTLs explained over 10.00% of PV for fiber length, fiber uniformity, fiber strength,  
29 fiber elongation and fiber micronaire, respectively. In the RIL population, six  
30 common QTLs detected in more than one environment such as *qFL-Chr1-2*,  
31 *qFS-Chr5-1*, *qFS-Chr9-1*, *qFS-Chr21-1*, *qFM-Chr9-1* and *qFM-Chr9-2*. Two  
32 common QTLs of *qFE-Chr2-2* (TMB2386-SWU12343) and *qFM-Chr9-1*  
33 (NAU2873-CGR6771) explained 22.42% and 21.91% of PV. In addition, a total of  
34 142 and 46 epistatic QTLs and QTL  $\times$  environments (E-QTLs and QQEs) were  
35 identified in RIL-P and BC/P populations, respectively.

36

37

38 **Keywords: fiber quality traits, common QTL, paternal backcross population,**

39 **Upland cotton**

40

41

42 **INTRODUCTION**

43

44 Upland cotton (*Gossypium hirsutum* L.) is one of the most important sources of  
45 natural textile fiber. Among four cultivated species, Upland cotton shows higher yield  
46 potential and stronger adaptation to diverse environments than Sea island cotton (*G.*  
47 *barbadense*), *G. arboreum* and *G. herbaceum*, and accounts for more than 92% of  
48 cultivated cotton worldwide (Zhang *et al.* 2015a). But fiber quality of Upland cotton  
49 is not as good as that of Sea Island cotton. To meet the diverse demands of textile

50 industry, it is a key target to improve fiber quality in breeding project of Upland  
51 cotton.

52 Generally, fiber quality traits consisted of fiber length (FL), fiber uniformity  
53 (FU), fiber strength (FS), fiber elongation (FE), and fiber micronaire (FM). Different  
54 traits have different genetic mechanisms. Among 4892 QTLs in Cotton QTLdb  
55 database (Yu *et al.* 2014), 494, 289, 470, 287 and 395 were detected for FL, FU, FS,  
56 FE and FM, respectively (<http://www2.cottonqtl.org:8081/>, CottonQTLdb, newly  
57 released V2.3 on January 24, 2018).

58 A total of 151, 132, 91, 118 and 234 QTLs were meta-analyzed for QTL-rich  
59 regions for FL, FU, FS, FE and FM, respectively (Said *et al.* 2013). A number of  
60 QTLs were located on Chr 5, Chr 19 and Chr 21 (Said *et al.* 2013, 2015). For fiber  
61 quality, the most QTLs were detected based on mapping in recombinant inbred lines  
62 (RIL) populations of Upland cotton (Wu *et al.* 2009; Sun *et al.* 2012; Ning *et al.* 2014;  
63 Tan *et al.* 2014; Shang *et al.* 2015; Tang *et al.* 2015; Zhang *et al.* 2015b; Jamshed *et*  
64 *al.* 2016; Li *et al.* 2016). However, RIL population can be only used to dissect  
65 additive and additive  $\times$  additive effects and not to dissect dominance and  
66 dominance-related genetic effects because lacking of heterozygous genotypes.  
67 Recently, RIL populations as permanent mapping populations, were used to develop  
68 backcross populations in rice (Mei *et al.* 2005) and cotton (Shang *et al.* 2016d), which  
69 allows performing repetitive trials as doing in 'immortalized' F<sub>2</sub> population (Hua *et al.*  
70 2002, 2003). Seven QTLs controlled fiber length and fiber strength by using  
71 backcross population deriving from Guazuncho 2  $\times$  VH8-4602 (Lacape *et al.* 2005).  
72 And 44 QTLs for fiber quality traits were detected on Chr 1, Chr 9 and Chr 21 using  
73 (CCRI 8  $\times$  Pima 90-53)  $\times$  CCRI 8 BC<sub>1</sub>F<sub>1</sub> interspecific population (Yang *et al.* 2015).  
74 Shang *et al.* (2016d) detected 17, 6, 15, 11 and 21 QTLs for FL, FU, FS, FE and FM,

75 respectively, in F<sub>9</sub> RIL and F<sub>9</sub>BC<sub>1</sub> progenies of a hybrid ‘Xinza 1’, While Wang *et al.*  
76 (2016) detected 22, 14, 17, 3 and 20 QTLs for the five traits in another two parental  
77 F<sub>8</sub>BC<sub>1</sub> populations. In Wang’s work (2016), two markers of NAU5530 and CIR099  
78 flanking *qFL-c19-2*, *qFU-LG3-1* and *qFS-LG3* were same in Shang’s work (2016d).  
79 Using a map of single nucleotide polymorphism (SNP) markers, one fiber length  
80 hotspot on Chr 5 carrying three QTLs was observed (Li *et al.* 2016). Additionally,  
81 four potential candidate genes for fiber length on Chr Dt7 were found using  
82 genotyping by sequencing by genome-wide association studies (GWAS) (Su *et al.*  
83 2016). Previous studies indicated that the RIL population and its two BCF<sub>1</sub>  
84 populations which derived from the same parents increased the power of QTL  
85 detection in cotton (Shang *et al.* 2016d; Wang *et al.* 2016). Therefore, it is also  
86 available to dissect QTLs for fiber quality using multiple populations at the same time  
87 on Upland cotton. Cotton genomes for diploid species (Paterson *et al.* 2012; Wang *et al.*  
88 *et al.* 2012; Li *et al.* 2014; Du *et al.* 2018) and tetraploid genomes (Zhang *et al.* 2015; Li  
89 *et al.* 2015c; Yuan *et al.* 2015; Liu *et al.* 2015) had been released recently, so as recent  
90 genomics researches in cotton (Fang *et al.* 2017a; Wang *et al.* 2018). These genomics  
91 analysis in cotton facilitate applications of SNP markers (Ali *et al.* 2018) and GWAS  
92 for fiber quality (Fang *et al.* 2017b; Ma *et al.* 2018b). It is very important to detect  
93 novel QTLs and to validate the reported QTLs using diverse populations. In our  
94 previous study, serial genetic analyses were performed in multiple segregating  
95 populations including F<sub>2</sub>, F<sub>2:3</sub>, RIL and BC/M population derived from the hybrid  
96 ‘Xinza 1’ across multiple years and various locations (Liang *et al.* 2013; Liang *et al.*  
97 2015; Shang *et al.* 2015, 2016a,b,c,d; Ma *et al.* 2017, 2018a, 2019). In previous study,  
98 111 quantitative trait loci (QTLs) were detected for fiber quality using four  
99 populations derived from RIL (XZ) and backcross (XZV) hybrids (Shang *et al.*

100 2016d). Recently, a total of 55 QTLs were detected which distributed in 21  
101 chromosomes using BC/M population in three locations (Ma *et al.* 2017). In addition,  
102 32 QTLs at five stages and 24 conditional QTLs at four intervals were detected for  
103 plant height in different years or populations or stages (Ma *et al.* 2018a). And 26 and  
104 27 QTLs including heterotic loci were identified in TC/P and TC/M populations,  
105 respectively (Ma *et al.* 2019). In addition, 10 and 16 clusters improved more than one  
106 trait for fiber quality and yield and yield-components, respectively (Ma *et al.* 2017;  
107 Ma *et al.* 2019). In order to identify and validate genetic components related fiber  
108 quality traits, we further developed BCF<sub>1</sub> progenies population based on RIL  
109 population by backcrossing with the paternal parent of ‘Xinza 1’. Here we termed as  
110 paternal backcross population (BC/P population for short). We generated additional  
111 177 BCF<sub>1</sub> crosses for BC/P populations by backcrossing the 177 RI lines as current  
112 female parents to GX100-2 (the original male parent), respectively. Detection of new  
113 and novel QTLs and comparison analysis were performed for fiber quality traits using  
114 BC/P, BC/M and RIL populations together.

115

## 116 **MATERIALS AND METHODS**

117

### 118 **Plant materials and populations development**

119 The intraspecific F<sub>14</sub> recombinant inbred lines (RIL) were inbred for 177 individuals,  
120 which were derived from an Upland cotton hybrid “Xinza 1” (GX 1135 × GX 100-2)  
121 by single seed descent method (Shang *et al.* 2016a). The parental backcross (BC/P)  
122 population was obtained by backcrossing the original male parent (GX100-2) to 177  
123 RI lines, respectively. The maternal backcross (BC/M) population referred to the  
124 previous study (Ma *et al.* 2017; Ma *et al.* 2019). The control set was performed in

125 each experimental trial, including GX100-2, “Xinza 1”, GX1135 and a competition  
126 hybrid “Ruiza 816” in Yellow River Region.

127 In present study, we named the maternal and paternal backcross populations as BC/M  
128 and BC/P populations for short, respectively, and similarly referred RIL-M population  
129 and RIL-P population as RIL population used in BC/M field trials and in BC/P field  
130 trials, respectively.

131

### 132 **Field arrangement, sampling and trait evaluation**

133 Three BC/P field trials and one maternal BC trial were conducted in 2015 and 2016 in  
134 two locations in China, E1: Quzhou Experimental Station in Handan City, and E2:  
135 Guoxin Seed Company Ltd in Cangzhou City (Ma *et al.* 2017, 2018a, 2019). The field  
136 trials were designed and planted same to the previous study for BC field trials (Shang  
137 *et al.* 2016a; Ma *et al.* 2017, 2018a, 2019). Field management followed the local  
138 conventional standard field practice.

139 Twenty-five naturally opening bolls in the middle of plants were hand-harvested  
140 for each plot at mature stage in three environments, respectively. Fiber samples were  
141 ginned and sampled for measurements of fiber quality traits with HVI 900 instrument  
142 (USTER\_ HVISPECTRUM, SPINLAB, USA) at Cotton Fiber Quality Inspection and  
143 Test Center of Ministry of Agriculture (Anyang, China) (Shang *et al.* 2016d). The  
144 fiber quality traits included 2.5% fiber span length (FL, mm), fiber uniformity  
145 (FU, %), fiber strength (FS, cN/tex), fiber elongation (FE), and fiber micronaire (FM)  
146 as usual.

147

### 148 **Genetic Map and Data Analysis**

149 The genetic map based on RIL population published before (Shang *et al.* 2016c), in  
150 which a total of 653 loci based on SSR markers distributed on 31 linkage groups and  
151 anchored on 26 chromosomes, covering 3889.9 cM (88.20%) of cotton genome with  
152 average interval of 6.2 cM (Ma *et al.* 2017, 2018a, 2019). The genotype for each  
153 maternal F<sub>14</sub>BC<sub>1</sub> was deduced on the basis of the RIL genotype used as the parent for  
154 backcross (Shang *et al.* 2016a, b, c).

155 Basic statistical analysis was implemented by the software SPSS (Version 19.0,  
156 SPSS, Chicago). Using the variance analysis, heritability was calculated in the  
157 equation as  $h^2 = \delta^2_G / [\delta^2_G + (\delta^2_{G \times E}) / env]$ , where  $\delta^2_G$  and  $\delta^2_{G \times E}$  refers to the genotypic  
158 variance and genotype-by-environment interaction variance, respectively, and *env* to  
159 the number of the environments.

160 Composite interval mapping (CIM) method was used for QTL mapping in the  
161 confidence interval of 95%. The software QTL Cartographer (Version 2.5) (Zeng *et al.*  
162 1994; Wang *et al.* 2007) was used to map single-locus QTL and to estimate the  
163 genetic effect. The threshold of LOD was estimated to declare a suggestive QTL after  
164 1000 permutation times, whereas QTL in another environment or population with  
165 LOD of at least 2.0 was considered as common QTL (Liang *et al.* 2013; Shang *et al.*  
166 2015, 2016d). According to the position linked and shared common markers, QTLs  
167 detected in different populations were regarded as common QTL (Shao *et al.* 2014;  
168 Shang *et al.* 2016d; Ma *et al.* 2017).

169 The QTL IciMapping 4.1 ([www.isbreeding.net](http://www.isbreeding.net)) was conducted by the two-locus  
170 analysis using inclusive composite interval mapping (ICIM) method (Shang *et al.*  
171 2016d; Ma *et al.* 2017).. The main-effect QTL (M-QTL) and its environmental  
172 interaction (QTL  $\times$  environment, QE), epistatic QTLs (E-QTLs) and its  
173 environmental interactions (QTLs  $\times$  environment, QQE) were conducted using RIL-P

174 and BC/P datasets under multiple environments in three parental TC trials. A  
175 threshold LOD 2.5 and 5 scores were used to declare significant M-QTL and E-QTLs,  
176 respectively.

177

178

## 179 **Data availability**

180 All of our raw data are available as Supporting Information Table S6 for  
181 phenotype values of fiber quality traits of BC/M population in three field trials in this  
182 study, Table S7 for phenotype values of fiber quality traits in field trial of BC/P  
183 population in this study, and Supporting Information Table S8A for genotypes of RIL  
184 population (Shang *et al.* 2016a), Table S8B for genotypes of BC/M population (Ma *et*  
185 *al.* 2017), and Table S8C for genotypes of BC/P population.

186

187

## 188 **RESULTS**

189

### 190 **Trait Performance in Two Populations**

191 The ‘original’ maternal parent 'GX1135' of Xinza 1 performed differently with the  
192 ‘original’ male parent 'GX100-2' for five fiber quality traits (**Table 1**). The hybrid  
193 ‘Xinza 1’ showed no significant hybrid vigor of  $F_1$  for fiber quality traits ranging  
194 from -3.17% to 1.53% of mid-parent heterosis (MPH). Among different traits, larger  
195 phenotypic variation was observed for fiber length (FL), fiber strength (FS) and fiber  
196 micronaire (FM), ranging from 2.63% to 8.53% in both BC and RIL populations; And  
197 lighter phenotypic variation presented with 0.87% - 1.23% for fiber uniformity (FU)  
198 and fiber elongation (FE) in BC and RIL populations.



199 Genotype variance and environment variance for five traits showed significant  
200 variation at level of 0.05 in RIL and BC populations (**Table 2**). Fiber length (FL) and  
201 fiber uniformity (FU) increased in BC/P population in comparison with that in BC/M  
202 population, whereas fiber micronaire (FM) reduced. Fiber length (FL) and fiber  
203 strength (FS) showed larger heritability of 91.82% and 91.10% in RIL-P population,  
204 respectively. The heritability decreased to 86.63% and 81.93% for FL and FS in BC/P  
205 population, respectively (**Table 2**). The result indicated that wider range of  
206 phenotypic variation and bigger heritability in RIL-P population were showed in BC/P  
207 population for five fiber quality traits.

208

### 209 **Correlation Analysis among Fiber Quality Traits in Multiple Populations**

210 The significant correlation coefficients were calculated among five fiber quality traits  
211 in BC/P, BC/M, RIL-P and RIL-M populations in 2015E2, 2016E1 and 2016E2  
212 (Table 3). Fiber length (FL) correlated significantly and positively with fiber  
213 uniformity (FU), fiber strength (FS) and fiber elongation (FE) in these populations  
214 except FU in 2016E1. However, fiber micronaire (FM) showed significant negative  
215 correlation with FL and FS in the populations. This result was similar to the previous  
216 research (Liang et al, 2013; Shang et al, 2016d; Ma et al, 2019).

217 The correlations were similar tendency among BC/P and BC/M populations. In  
218 both BC/P and BC/M populations, no significant correlation was showed between FU  
219 and FS. However, the majority of correlation values decreased in both BC/P and  
220 BC/M populations in comparison with correlation values in RIL population after  
221 backcrossing to either of parents.

222

### 223 **Single Locus QTL Analysis**

224 In four field trials, a total of 37 QTLs controlling fiber quality were detected in three  
225 corresponding populations of BC/P, RIL-P, BC/M and RIL-M, explaining 5.01% -  
226 22.42% of PV (phenotypic variance) (**Table 4, Figure 1**). These QTLs anchored on  
227 17 chromosomes, respectively.

228 For fiber length, six, one and five QTLs were identified in BC/P, BC/M and RIL  
229 populations, respectively. The *qFL-Chr5-2* was simultaneously identified in 2015E2  
230 and 2016E1, explaining 7.46% and 7.82% of PV, respectively. The *qFL-Chr1-2* was  
231 simultaneously detected in 2016E1 and 2016E2, explaining 7.01% and 6.91% of PV,  
232 respectively. The *qFL-Chr19-1* explaining 17.98% of PV in BC/P population was  
233 verified in RIL population with 11.05% of PV. Among five QTLs detected in RIL  
234 population, three QTLs showed additive effects originated from GX1135 alleles  
235 whereas three QTLs showed additive effects offered by GX100-2 alleles. Three QTLs  
236 *qFL-Chr5-1*, *qFL-Chr5-2* and *qFL-Chr5-3* were distributed on chromosome 5 (Chr 5),  
237 and three QTLs *qFL-Chr1-1*, *qFL-Chr1-2* and *qFL-Chr1-3* were distributed on Chr 1.

238 A total of five QTLs were detected for fiber uniformity (FU) explaining 8.76% -  
239 11.86% of PV, which distributed on four chromosomes. Four QTLs and one were  
240 identified in BC/P and RIL populations, respectively. No common QTL was identified  
241 in multiple populations or multiple environments. The *qFU-Chr6-1* increased FU  
242 providing alleles by GX1135 in RIL population.

243 For fiber strength (FS), a total of six QTLs were detected on four chromosomes,  
244 explaining 6.27% - 22.09% of PV. Two common QTLs were identified. The  
245 *qFS-Chr3-1* was detected in BC/P population alone explaining high to 22.09% of PV  
246 in 2016E2. The *qFS-Chr3-1* increased 0.48 cN/tex fiber strength in 2016E2. The  
247 *qFS-Chr9-1* was simultaneously detected in RIL population in 2016E1 and 2016E2,  
248 providing alleles by female parent GX100-2 in both environments. The QTL

249 explained 9.23% of PV in 2016E2 and 11.01% of PV in 2016E1. All of four QTLs  
250 provided increasing effect alleles donated by female parent GX100-2 in both  
251 environments in RIL population. However, *qFS-Chr9-1* increased 0.46 cN/tex and  
252 0.47 cN/tex fiber strength in 2016E1 and 2016E2. The *qFS-Chr21-2* was detected in  
253 BC/P, BC/M and RIL populations at the same time across 2016E1 and 2016E2,  
254 explaining 6.27% - 13.37% of PV. Four QTLs distributed on A-subgenome of Chr 2,  
255 Chr 3, Chr 9 whereas the two remaining QTLs distributed on D-subgenome of Chr 21.

256 Six, two and six QTLs for fiber elongation (FE) were identified in the BC/P,  
257 BC/M and RIL populations, respectively. Four common QTLs were detected in at  
258 least two populations, including *qFE-chr2-2*, *qFE-chr2-3*, *qFE-chr3-1*, and  
259 *qFE-chr21-2*. The *qFE-chr2-3* detected in BC/P population was verified in BC/M and  
260 RIL populations, which explained 7.02% of PV on average. The *qFE-chr3-1*  
261 explaining 12.17% of PV in BC/P population were also detected in BC/M population  
262 in the same environment of 2016E2. The *qFE-Chr2-2* explained 22.42% of PV in RIL  
263 population in 2016E1 and was observed in BC/M population in 2016E2. The  
264 *qFE-Chr21-2* detected in BC/P population was also identified in RIL population.

265 A total of 5 QTLs underlying fiber micronaire were located on 5 chromosomes.  
266 The *qFM-Chr9-2* was identified in BC/M and RIL populations in 2016E2 explaining  
267 14.53% and 21.91% of PV, respectively. At the same time, the QTL were detected in  
268 three environments of 2015E2, 2016E1 and 2016E2. Another common QTL  
269 *qFM-Chr15-1* was simultaneously detected in RIL population in 2016E1 and in BC/M  
270 population in 2016E2, explaining 12.36% and 5.46% of PV, respectively. All of six  
271 QTLs detected in RIL population increased over 0.10 fiber micronaire value, which  
272 donating increasing additive effect alleles by GX1135, containing *qFM-Chr9-1*,  
273 *qFM-Chr9-2*, *qFM-Chr12-1*, *qFM-Chr14-1*, *qFM-Chr14-2*, and *qFM-chr15-1*. On

274 summary, 19 QTL explained 10.14-22.09% of PV on average in BC/P population in  
275 2015E2, 2016E1 and 2016E2. Among them, a total of eight QTLs explained larger  
276 than 10% of PV. Then, we identified 8 QTLs in BC/M population, explained 9.03% of  
277 PV on average. At last, 20 QTLs existed in RIL-P and RIL-M populations explaining  
278 on average 10.39% of PV in four environments above. Totally, 12 common QTLs  
279 were detected in multiple environments or in multiple populations of BC/P, BC/M,  
280 RIL-P and RIL-M populations (Table 4, S5).

281

### 282 **Pleiotropic Effects**

283 We also observed 5 pleiotropic regions controlling at least two fiber quality traits  
284 on 2 chromosomes of Chr 9, Chr18 and Chr 21 (Figure 1). Of these, a pleiotropic  
285 region flanking with SWU15511- SWU15413 on Chr 9 increased the values for FL  
286 and FS, showing increasing additive effects originated from alleles of GX100-2. The  
287 NAU2873-CGR6771 on Chr 9 contributed alleles to FS but also increased the FM.  
288 The region of SWU0830-HAU2004-CGR5602 contained *qFU-Chr21-1* in BC/P  
289 population and *qFE-Chr21-1* in RIL-P population. And SWU0189-CGR5808 on Chr  
290 21 flanked along *qFS-Chr21-1*, *qFS-Chr21-2* and *qFE-Chr21-2*, all of which showing  
291 increasing additive effects originated from alleles of GX100-2. The region of  
292 SWU15511- SWU15413 on Chr 18 controlled fiber length and fiber elongation at the  
293 same time.

294

### 295 **Digenic and Environmental Interactions in Three BC/P Trials**

296 In the three repetitive BC/P trials, a total of 38 and 56 M-QTLs and environmental  
297 interactions (QTL  $\times$  environment, QE) were identified in BC/P and RIL-P populations,  
298 respectively (Table 5, Table S1, S2). Of these, they explained 2.53% - 3.13% and

299 2.63% - 3.41% of PV on average in the populations, respectively. Environmental  
300 effect prevailed in both BC/P and RIL-P populations. However, environment and  
301 M-QTL interacted with 1.24% of PV in the BC/P population while with 0.90% of PV  
302 in RIL-P population.

303 Then, 46 and 142 E-QTLs and their environmental interactions (digenic  
304 interactions  $\times$  environment, QQE) were respectively identified in BC/P and RIL-P  
305 populations, respectively (**Table S3, S4**). Eighteen pairs of E-QTL and QQE  
306 explained 4.17% of PV on average in RIL-P population, while nine pairs of E-QTL  
307 and QQE explained 2.58% of PV on average in BC/P populations (**Table 5**). On  
308 average, the number of both types of M-QTL and E-QTL was larger in RIL  
309 populations than that in BC populations. To our surprise, epistatic interactions  
310 contributed more to fiber quality than M-QTLs did in RIL-P population.

311 Totally, 20 (42.5%) and 101 (71.13%) pairs of E-QTLs and QQE contained  
312 M-QTLs and QEs in BC/P and RIL-P populations, respectively (**Table 6**). We  
313 detected about 3-fold epistatic QTLs in RIL populations than QTLs in BC/P  
314 population, and 19.01% M-QTLs participated epistasis between M-QTL and M-QTL.  
315 Three types of epistasis were checked: I) both loci were M-QTLs; II) either locus  
316 between two loci was M-QTL; III) both loci were no M-QTLs (Shang *et al.* 2016d;  
317 Ma *et al.* 2019). Apparently, 27 (57.45%) epistatic QTLs of type III was the most  
318 popular type in epistatic styles in BC/P population whereas it was 31 (52.11%)  
319 epistatic QTLs of type II in RIL-P population (Table 6). The results indicated that  
320 epistasis played more vital role in improving fiber quality both in RIL populations of  
321 Upland cotton. The result was consistent to the previous result that epistatic QTLs  
322 with significant additive  $\times$  additive effects were identified for fiber quality traits  
323 (Wang *et al.* 2017; Ma *et al.*, 2019).

324

325

## 326 **DISCUSSION**

327 In present study, the paternal BC (BC/P) population was constructed to explore the  
328 genetic mechanism for fiber quality, following the maternal BC (BC/M) population  
329 (Shang *et al.* 2016d; Ma *et al.* 2017, 2019). The backcross design has the obvious  
330 advantages: (I) dissecting the genetic components between paternal and maternal  
331 backcross populations; (II) identifying more new and novel QTLs for important traits  
332 using multiple corresponding populations (BC/P, BC/M and RIL) originated from the  
333 same hybrid; and (III) allowing to generate enough hybrid seeds when needed, similar  
334 to IF<sub>2</sub> population.

335 Here, we detected 19 and 8 QTLs alone in BC/P and BC/M populations,  
336 respectively. Three QTLs for fiber strength and fiber elongation shared in both BC  
337 populations, including *qFS-Chr21-2*, *qFE-Chr2-3* and *qFE-Chr3-1*. The result  
338 indicated that remaining elite alleles (84.21%) showed increasing additive effects  
339 originated from male parent for fiber quality in BC/P population. Therefore, the  
340 present study was significant for separating the novel elite alleles of male parent for  
341 fiber quality.

342 The identification of stable QTLs (including common QTLs) across multiple  
343 environments and multiple populations plays an essential role in marker-assisted  
344 selection (MAS) (Jamshed *et al.* 2016). In present study, a total of 12 common QTLs  
345 were simultaneously identified in more than one environment(s) or population(s)  
346 (**Table 4**). They distributed on Chr 1, Chr 2, Chr 3, Chr 5, Chr 9, Chr 15, Chr 19 and  
347 Chr 21. In present study, a total of 13 single locus QTLs (35.14%) for fiber quality  
348 were common in comparison with the previous studies in multiple years and multiple

349 locations see Table S5 (Shang *et al.* 2016d; Ma *et al.* 2017). The QTLs verified each  
350 other in the RIL population and its BC progenies, suggesting that it is reasonable and  
351 effective to map QTLs using different populations across multiple environments and  
352 multiple years. The experiment design and the continuous study in our lab contributed  
353 to these results in the present study. Among these 13 QTLs, 10 QTLs explained larger  
354 than 10% of PV. Five QTLs were identified in Shang *et al.*' results (2016d) and Ma *et*  
355 *al.*' results (2017), including *qFL-Chr5-1*, *qFL-Chr5-2*, *qFL-Chr5-3*, *qFS-Chr21-1*  
356 *and qFE-Chr2-1* (Table S5). For example, region of NAU4034- SWU17713 flanking  
357 with *qFL-chr5-1* explained 12.31% of PV on average across 2012 and 2015 in  
358 multiple locations. The QTL increased 0.31 mm fiber length (FL) on average,  
359 suggesting the major roles and important regions for FL. These verified QTLs were  
360 valuable for follow-up breeding program, so as to facilitate fine mapping and  
361 favorable gene pyramiding project (Shao *et al.* 2014).

362 The epistatic effects and environmental interactions existed commonly for fiber  
363 quality traits as well as other traits. At two-locus level, we detected a number of  
364 interactions under environments for fiber quality traits in both populations (**Table 5**).  
365 Three types of epistasis combinations were observed (**Table 6**). However, epistasis  
366 QTLs influenced fiber quality by Type III (57.45%) in BC/P population. Differently,  
367 epistasis influenced fiber quality by Type I and Type II (71.13%) in RIL population.  
368 In addition, 3-fold epistasis QTLs was detected in RIL-P population than that in BC/P  
369 population. The results indicating that epistasis played roles in different genetic mode  
370 to control fiber quality. Especially, no E-QTL was identified for fiber uniformity (FU).  
371 Another interesting result detected that epistasis is another vital genetic effect  
372 affecting fiber quality traits (Shang *et al.* 2016d). Similarly to the previous study,

373 Wang *et al.* (2006) indicated that both epistasis effect and single-locus effect of QTLs  
374 played important genetic roles in cotton fiber quality.

375 In the present study, the five QTLs increased fiber micronaire (FM) values from  
376 0.06-0.18 (**Table 4**). The mean values ranged from 4.71-5.18 on average in the RIL-P  
377 and BC/P populations of Xinza 1. In fact, fiber quality ranks from B grade (3.5-3.6,  
378 4.3-4.9) to C grade (<3.4, >5.0) for fiber micronaire, in which the fiber change larger  
379 thickness to be worse. At the same time, FM displayed negative correlation with FL,  
380 FU, FS and FE. Therefore, we should avoid exploiting these QTL regions for FM  
381 when breeding in cotton. Therefore, we will not focus on the region of  
382 NAU2873-CGR6771 on Chr 9, contributing alleles to FS and increased the FM values.  
383 At the same time, larger lint yield and well fiber quality are the key aims in cotton  
384 breeding program. However, negative correlation between yield and fiber quality  
385 hinders the cotton breeding (Yang *et al.* 2015). Many important heterotic loci were  
386 detected to increase yield or yield-components in previous studies in our lab (Shang *et*  
387 *al.* 2016a; Ma *et al.* 2019). Some heterotic loci were also identified for improving  
388 fiber quality in present and previous studies (Shang *et al.* 2016d; Ma *et al.* 2017). The  
389 important pleiotropic regions should be paying more attention in further research so as  
390 to improve fiber quality and to increase yield in breeding program.

391

392



393

394 **AUTHOR CONTRIBUTIONS**

395 LM performed the experiments, analyzed the data and prepared the manuscript. YW maintained  
396 the experimental platform and attended bench work. YS, HN, YC, CC and MW attended field  
397 experiments and data collection. JH conceived the experiments, provided experimental platform  
398 and revised the manuscript.

399

400

401 **ACKNOWLEDGMENTS**

402 We thank Shihu Cai (China Agricultural University), Dongyong Xu and Huaiyu Lu (Guoxin Seed  
403 Company Ltd, Cangzhou, Hebei Province) for their contributions on field experiments and data  
404 acquisition. Thanks to Qingzhi Liang, Lianguang Shang, Abdugheni Abduweli, Xiaocui Wang  
405 (China Agricultural University) for the contributions in SSR marker evaluation and map  
406 construction, Kunbo Wang and Fang Liu (Institute of Cotton Research, Chinese Academy of  
407 Agricultural Sciences) for providing part of SSR markers, Dr. Zhengsheng Zhang (Southwest  
408 University) for providing SWU and ICR SSR primers. This research was supported by the  
409 National Key R & D Program for Crop Breeding (2016YFD0101407) to J.H.

410

411

412 **REFERENCES**

- 413 Ali, I., Teng, Z., Bai, Y., Yang, Q., Hao, Y., Hou, J., *et al.*, 2018 A high density SLAF-SNP genetic map and  
414 QTL detection for fibre quality traits in *Gossypium hirsutum*. *BMC Genomics* **19**: 879.  
415 <https://doi.org/10.1186/s12864-018-5294-5>
- 416 Du, X.M., Huang, G., He, S., Yang, Z., Sun, G., Ma, X., *et al.*, 2018 Resequencing of 243 diploid cotton  
417 accessions based on an updated A genome identifies the genetic basis of key agronomic traits. *Nat. Genet.* **50**:  
418 796-802. doi: [org/10.1038/s41588-018-0116-x](https://doi.org/10.1038/s41588-018-0116-x)
- 419 Fang, L., Gong, H., Hu, Y., Liu, C., Zhou, B., Huang, T., *et al.*, 2017a Genomic insights into divergence and  
420 dual domestication of cultivated allotetraploid cottons. *Genome Biol.* **18**: 33. doi:  
421 [org/10.1186/s13059-017-1167-5](https://doi.org/10.1186/s13059-017-1167-5)
- 422 Fang, L., Wang, Q., Hu, Y., Jia, Y. H., Chen, J. D., Liu, B. L., *et al.*, 2017b Genomic analyses in cotton identify  
423 signatures of selection and loci associated with fiber quality and yield traits. *Nat. Genet.* **19**: 1089-1098. doi:

- 424 10.1038/ng.3887
- 425 Hua, J. P., Xing, Y. Z., Xu, C. G., Sun, X. L., Yu, S. B., and Zhang Q. F., 2002 Genetic dissection of an elite rice  
426 hybrid revealed that heterozygotes are not always advantageous for performance. *Genetics* **162**: 1885-1895.  
427 doi: genetics.org/content/162/4/1885
- 428 Hua J. P., Xing, Y. Z., Wu, W. R., Xu, C. G., Sun, X. L., Yu, S. B., and Zhang, Q. F., 2003 Single locus heterotic  
429 effects and dominance by dominance interactions can adequately explain the genetic basis of heterosis in an  
430 elite rice hybrid. *Proc. Natl. Acad. Sci. USA* **100**: 2574-2579. doi: 10.1073/pnas.0437907100
- 431 Hulse-kemp A. M, Lemm, J., Plieske, J., Ashrafi, H., Buyyarapu, R., Fang, D. D., *et al.*, 2015 Development of a  
432 63K SNP array for cotton and high-density mapping of intraspecific and interspecific populations of  
433 *Gossypium spp.* G3: Genes, Genomes, *Genetics* **5**: 1187. doi: org/10.1534/g3.115.018416
- 434 Islam, M. S., Zeng, L. H., Delhom, C. D., Song, X. L., Kim, H. J., Li, P., *et al.*, 2014 Identification of cotton  
435 fiber quality quantitative trait loci using intraspecific crosses derived from two near-isogenic lines differing in  
436 fiber bundle strength. *Mol. Breeding* **34**: 373-384. doi: 10.1007/s11032-014-0040-4
- 437 Jamshed, M. J., Jia, F., Gong, J. W., Palanga, K. K., Shi, Y. Z., Li, J. J., *et al.*, 2016 Identification of stable  
438 quantitative trait loci (QTLs) for fiber quality traits across multiple environments in *Gossypium hirsutum*  
439 recombinant inbred line population. *BMC Genomics* **17**: 197. doi: org/10.1186/s12864-016-2560-2
- 440 Lacape, J. M., Nguyen, T. B., Courtois, B., Belot, J. L., Giband, M., Gourlot, J. P., *et al.*, 2005 QTL analysis of  
441 cotton fiber quality using multiple *Gossypium hirsutum* × *Gossypium barbadense* testcross generations. *Crop*  
442 *Sci.* **45**: 123-140. doi: 10.2135/cropsci2005.0123a
- 443 Larièpe, A., Mangin, B., Jasson, S., Combes, V., Dumas, F., Jamin, P., *et al.*, 2012 The genetic basis of heterosis:  
444 multiparental quantitative trait loci mapping reveals contrasted levels of apparent overdominance among traits  
445 of agronomical interest in maize (*Zea mays* L.). *Genetics* **190**: 795-811. doi: org/10.1534/genetics.111.133447
- 446 Li, C., Dong, Y. T., Zhao, T. L., Li, L., Li, C., Yu, E., *et al.*, 2016 Genome-wide SNP linkage mapping and QTL  
447 analysis for fiber quality and yield traits in the Upland cotton recombinant inbred lines population. *Front*  
448 *Plant Sci.* **7**: 1356. doi: 10.3389/fpls.2016.01356
- 449 Li, F. G., Fan, G. Y., Lu, C. R., Xiao, G. G., Zou, C. S., Kohel, R. J., *et al.* (2015). Genome sequence of cultivated  
450 Upland cotton (*Gossypium hirsutum* TM-1) provides insights into genome evolution. *Nat. Biotechnol.* **33**:  
451 524-530. doi: 10.1038/nbt.3208
- 452 Li, F. G., Fan, G. Y., Wang, K. B., Sun, F. M., Yuan Y. L., Song, G. L., *et al.*, 2014 Genome sequence of the  
453 cultivated cotton *Gossypium arboreum*. *Nat. Genet.* **46**: 567-572. doi: 10.1038/ng.2987
- 454 Li, Y., Tu, L. L., Ye, Z. X., Wang, M. J., Gao W. H., and Zhang, X. L., *et al.*, 2015b A cotton fiber-preferential  
455 promoter, PGBEXPA2, is regulated by GA and ABA in Arabidopsis. *Plant Cell Rep.* **34**: 1539-1549. doi:  
456 10.1007/s00299-015-1805-x
- 457 Liang, Q. Z., Hu, C., Hua, H., Li, Z. H., and Hua, J. P., 2013 Construction of a linkage map and QTL mapping

- 458 for fiber quality traits in upland cotton (*Gossypium hirsutum* L.). *Chinese Sci. Bull.* **58**: 3233-3243. doi:  
459 10.1007/s11434-013-5807-1
- 460 Liang, Q. Z., Shang, L. G., Wang, Y. M., and Hua, J. P., 2015 Partial dominance, overdominance and epistasis as  
461 the genetic basis of heterosis in Upland Cotton. *PLoS ONE* **10**: e0143548. doi: 10.1371/journal.pone.0143548
- 462 Liu, X., Zhao, B., Zheng, H. J., Hu, Y., Lu G., Yang, C. Q., *et al.*, 2015 *Gossypium barbadense* genome  
463 sequence provides insight into the evolution of extra-long staple fiber and specialized metabolites. *Sci. Rep.* **5**:  
464 14139. doi: 10.1038/srep14139
- 465 Lv, F. N., Li, P., Zhang, R., Li, N. N., and Guo, W. Z., 2016 Functional divergence of GhCFE5, homoeologs  
466 revealed in cotton fiber and Arabidopsis, root cell development. *Plant Cell Rep.* **35**: 867-881. doi:  
467 10.1007/s00299-015-1928-0
- 468 Ma, L.L., Zhao, Y. P., Wang, Y.M., Shang, L. G., Hua, J. P., 2017 QTLs analysis and validation for fiber quality  
469 traits using maternal backcross population in Upland cotton. *Front. Plant Sci.* **8**: 2168. doi:  
470 10.3389/fpls.2017.02168
- 471 Ma, L.L., Ijaz, B, Wang, Y.M., Hua, J. P., 2018a Dynamic QTL analysis and validation for plant height using  
472 maternal and paternal backcrossing populations in Upland cotton. *Euphytica* **214**: 167. doi:  
473 10.1007/s10681-018-2243-y.
- 474 Ma, L.L., Wang, Y.M., Ijaz, B, Hua, J. P., 2019 Cumulative and different genetic effects contributed to yield  
475 heterosis using maternal and paternal testcross populations in Upland cotton. *Sci. Rep.* SERP-18-00034B  
476 (under review)
- 477 Ma, Z., He, S., Wang, X., Sun, J., Zhang, Y., Zhang, G., *et al.*, 2018b Resequencing a core collection of upland  
478 cotton identifies genomic variation and loci influencing fiber quality and yield. *Nat. Genet.* **50**: 803-813. doi:  
479 org/10.1038/s41588-018-0119-7
- 480 Mei, H. W., Li, Z. K., Shu, Q. Y., Guo, L. B., Wang, Y. P., Yu, X. Q., *et al.*, 2005 Gene actions of QTLs  
481 affecting several agronomic traits resolved in a recombinant inbred rice population and two backcross  
482 populations. *Theor. Appl. Genet.* **110**: 649-659. doi: 10.1007/s00122-004-1890-7
- 483 Ning, Z. Y., Chen, H., Mei, H. X., and Zhang, T. Z., 2013 Molecular tagging of QTLs for fiber quality and yield  
484 in the upland cotton cultivar Acala-Prema. *Euphytica* **195**: 143-156. doi: 10.1007/s10681-013-0990-3
- 485 Paterson, A. H., Wendel, J. F., Gundlach, H., Guo, H., Jenkins, J., Jin, D., *et al.*, 2012 Repeated polyploidization  
486 of *Gossypium* genomes and the evolution of spinnable cotton fibres. *Nature* **492**: 423-427. doi:  
487 10.1038/nature11798
- 488 Said, J. I., Knapka, J. A. Song, M. Z., and Zhang, J. F., 2015 Cotton QTLdb: a cotton QTL database for QTL  
489 analysis, visualization, and comparison between *Gossypium hirsutum* and *G. hirsutum* × *G. barbadense*  
490 populations. *Mol. Genet. Genom.* **290**: 1615-1625. doi: 10.1007/s00438-015-1021-y
- 491 Said, J. I., Lin, Z. X., Zhang, X. L., Song, M. Z., and Zhang, J. F., 2013 A comprehensive meta QTL analysis for

- 492 fiber quality, yield, yield related and morphological traits, drought tolerance, and disease resistance in  
493 tetraploid cotton. *BMC Genomics* **14**: 776. doi: [org/10.1186/1471-2164-14-776](https://doi.org/10.1186/1471-2164-14-776)
- 494 Shang, L. G., Liang, Q. Z. Wang, Y. M. Wang, X. C. Wang K. B., Abduweli, A., *et al.*, 2015 Identification of  
495 stable QTLs controlling fiber traits properties in multi-environment using recombinant inbred lines in Upland  
496 cotton (*Gossypium hirsutum* L.). *Euphytica* **205**: 877-888. doi: [10.1007/s10681-015-1434-z](https://doi.org/10.1007/s10681-015-1434-z)
- 497 Shang, L. G., Liang, Q. Z., Wang, Y. M., Zhao, Y. P., Wang, K. B., and Hua, J. P., 2016a Epistasis together  
498 with partial dominance, over-dominance and QTL by environment interactions contribute to yield heterosis in  
499 upland cotton. *Theor. Appl. Genet.* **129**: 1429-1446. doi: [10.1007/s00122-016-2714-2](https://doi.org/10.1007/s00122-016-2714-2)
- 500 Shang, L. G., Wang, Y. M., Cai, S. H., Ma, L. L., Liu F., Chen, Z. W., *et al.*, 2016b Genetic analysis of Upland  
501 cotton dynamic heterosis for boll number per plant at multiple developmental stages. *Sci. Rep.* **6**: 35515. doi:  
502 [10.1038/srep35515](https://doi.org/10.1038/srep35515)
- 503 Shang, L. G., Wang Y. M., Cai S. H., Wang, X. C., Li Y. H., Abduweli, A., *et al.*, 2016c Partial dominance,  
504 overdominance, epistasis and QTL by environment interactions contribute to the heterosis in two Upland  
505 cotton hybrids. *G3: Genes, Genomes, Genetics* **6**: 499-507. doi:[10.1534/g3.115.025809](https://doi.org/10.1534/g3.115.025809)
- 506 Shang, L. G., Wang, Y. M., Wang, X. C., Liu, F., Abduweli A., Cai S. H., *et al.*, 2016d Genetic analysis and  
507 stable QTL detection on fiber quality traits using two recombinant inbred line populations and their backcross  
508 progeny in Upland cotton. *G3: Genes, Genomes, Genetics* **6**: 2717-2724. doi:[10.1534/g3.116.031302](https://doi.org/10.1534/g3.116.031302)
- 509 Shao, Q. S., Zhang, F. J., Tang, S. Y., Liu, Y., Fang X. M., Liu, D. X., *et al.*, 2014 Identifying QTL for fiber  
510 quality traits with three upland cotton (*Gossypium hirsutum* L.) populations. *Euphytica* **198**: 43-58. doi:  
511 [10.1007/s10681-014-1082-8](https://doi.org/10.1007/s10681-014-1082-8)
- 512 Su, J. J., Li, L. B., Pang, C. Y., Wei, H. L., Wang, C. X., Song, M. Z., *et al.*, 2016 Two genomic regions  
513 associated with fiber quality traits in Chinese upland cotton under apparent breeding selection. *Sci. Rep.* **6**:  
514 38496. doi: [10.1038/srep38496](https://doi.org/10.1038/srep38496)
- 515 Sun, F. D., Zhang, J. H., Wang, S. F., Gong, W. K., Shi, Y. Z., Liu, A. Y., *et al.*, 2012 QTL mapping for fiber  
516 quality traits across multiple generations and environments in upland cotton. *Mol. Breeding* **30**: 569-582. doi:  
517 [10.1007/s11032-011-9645-z](https://doi.org/10.1007/s11032-011-9645-z)
- 518 Tan, Z. Y., Fang, X. M., Tang, S. Y., Zhang, J., Liu, D. J., Teng, Z. H., *et al.*, 2014 Genetic map and QTL  
519 controlling fiber quality traits in upland cotton (*Gossypium hirsutum* L.). *Euphytica* **203**: 615-628. doi:  
520 [10.1007/s10681-014-1288-9](https://doi.org/10.1007/s10681-014-1288-9)
- 521 Tang, S. Y., Teng, Z. H., Zhai, T. F., Fang, X. M., Liu, F., Liu, D. J., *et al.*, 2015 Construction of genetic map  
522 and QTL analysis of fiber quality traits for Upland cotton (*Gossypium hirsutum* L.). *Euphytica* **201**: 195-213.  
523 doi: [10.1007/s10681-014-1189-y](https://doi.org/10.1007/s10681-014-1189-y)

- 524 Wang, B. H., Draye, X., Zhuang, Z. M., Zhang, Z. S., Liu, M., Lubbers, E. L., *et al.*, 2017 QTL analysis of  
525 cotton fiber length in advanced backcross populations derived from a cross between *Gossypium hirsutum* and  
526 *G. mustelinum*. *Theor. Appl. Genet.* **130**: 1297-1308. doi: 10.1007/s00122-017-2889-1
- 527 Wang, H. T., Huang, C., Zhao, W. X., Dai, B. S., Shen, C., Zhang, B. B., *et al.*, 2016 Identification of QTL for  
528 fiber quality and yield traits using two immortalized backcross populations in Upland cotton. *PLoS ONE* **11**:  
529 e0166970. doi: 10.1371/journal.pone.0166970
- 530 Wang, K. B., Wang, Z. W., Li, F. G., Ye, W. W., Wang, J. Y., Song, G. L., *et al.*, 2012 The draft genome of a  
531 diploid cotton *Gossypium raimondii*. *Nat. Genet.* **44**: 1098-1103. doi: 10.1038/ng.2371
- 532 Wang, M. J., Tu, L. L., Lin, M., Lin, Z. X., Wang, P. C., Yang, Q. Y., *et al.*, 2017 Asymmetric subgenome  
533 selection and cis-regulatory divergence during cotton domestication. *Nat. Genet.* **49**: 579-587. doi:  
534 10.1038/ng.3807
- 535 Wang, M., Tu, L., Yuan, D., Zhu, D., Shen, C., Li, J., *et al.*, 2018 Reference genome sequences of two cultivated  
536 allotetraploid cottons, *Gossypium hirsutum* and *Gossypium barbadense*. *Nat. Genet.* **51**: 224-229. doi:  
537 org/10.1038/s41588-018-0282-x
- 538 Wang, S., Basten, C. J., and Zeng, Z. B., 2012 Windows QTL Cartographer V2.5-011. Department of Statistics,  
539 North Carolina State University, Raleigh, NC. <http://statgen.ncsu.edu/qtlcart/WQTLCart.htm>
- 540 Wu, J. X., Gutierrez, O. A., Jenkins, J. N., McCarty, J. C., and Zhu, J., 2009 Quantitative analysis and QTL  
541 mapping for agronomic and fiber traits in an RI population of Upland cotton. *Euphytica* **165**: 231-245. doi:  
542 10.1007/s10681-008-9748-8
- 543 Xiao, J. H., Li, J. M., Yuan, L. P., and Tanksley, S. D., 1995 Dominance is the major genetic-basis of heterosis  
544 in rice as revealed by QTL analysis using molecular markers. *Genetics* **140**: 745-754. doi:  
545 genetics.org/content/genetics/140/2/745
- 546 Xu, P., Gao, J., Cao, Z. B., Chee, P. W., Guo, Q., Xu, Z. Z., *et al.*, 2017 Fine mapping and candidate gene  
547 analysis of qFL-*chr1*, a fiber length QTL in cotton. *Theor. Appl. Genet.* **130**: 1309-1319. doi:  
548 10.1007/s00122-017-2890-8
- 549 Yang, X. L., Zhou, X. D., Wang, X. F., Li, Z. K., Zhang, Y., Liu, H. G., *et al.*, 2015 Mapping QTL for cotton  
550 fiber quality traits using simple sequence repeat markers, conserved intron-scanning primers, and  
551 transcript-derived fragments. *Euphytica* **201**: 215-230. doi: 10.1007/s10681-014-1194-1
- 552 Yuan, D. J., Tang, Z. H., Wang, M. J., Gao, W. H., Tu, L. L., Jin, X., *et al.*, 2015 The genome sequence of  
553 Sea-Island cotton (*Gossypium barbadense*) provides insights into the allopolyploidization and development of  
554 superior spinnable fibres. *Sci. Rep.* **5**: 17662. doi: 10.1038/srep17662
- 555 Zeng, Z. B., 1994 Precision mapping of quantitative trait loci. *Genetics* **136**: 1457-1468.  
556 <http://www.genetics.org/content/genetics/136/4/1457.full.pdf>
- 557 Zhang, J. F., Yu, J. W., Pei, W. F., Li, X. L., Said, J. I., Song, M. Z., *et al.*, 2015c Genetic analysis of Verticillium

558 wilt resistance in a testcross inbred line population and a meta-analysis of quantitative trait loci for disease  
559 resistance in cotton. *BMC Genomics* **16**: 577. doi: [org/10.1186/s12864-015-1682-2](https://doi.org/10.1186/s12864-015-1682-2)

560 Zhang, T. Z., Hu, Y., Jiang, W. K., Fang, L., Guan, X. Y., Chen, J. D., *et al.*, 2015a Sequencing of allotetraploid  
561 cotton (*Gossypium hirsutum* L. acc. TM-1) provides a resource for fiber improvement. *Nat. Biotechnol.* **33**:  
562 531-537. doi: [10.1038/nbt.3207](https://doi.org/10.1038/nbt.3207)

563 Zhang, Z., Li, J. W., Muhammad, J., Cai, J., Jia, F., Shi, Y. Z., *et al.*, 2015b High resolution consensus mapping  
564 of quantitative trait loci for fiber strength, length and Micronaire on chromosome 25 of the Upland cotton  
565 (*Gossypium hirsutum* L.). *PLoS ONE* **10**: e0135430. doi: [org/10.1371/journal.pone.0135430](https://doi.org/10.1371/journal.pone.0135430)

566 Zhang, Z. S., Xiao, Y. H., Luo, M., Li, X. B., Luo X. Y., Hou, L., *et al.*, 2005 Construction of a genetic linkage  
567 map and QTL analysis of fiber-related traits in upland cotton (*Gossypium hirsutum* L.). *Euphytica* **144**: 91-99.  
568 doi: [10.1007/s10681-005-4629-x](https://doi.org/10.1007/s10681-005-4629-x)

569

570 **Conflict of Interest Statement:** The authors declare that the research was conducted in the absence of any  
571 commercial or financial relationships that could be construed as a potential conflict of interest.



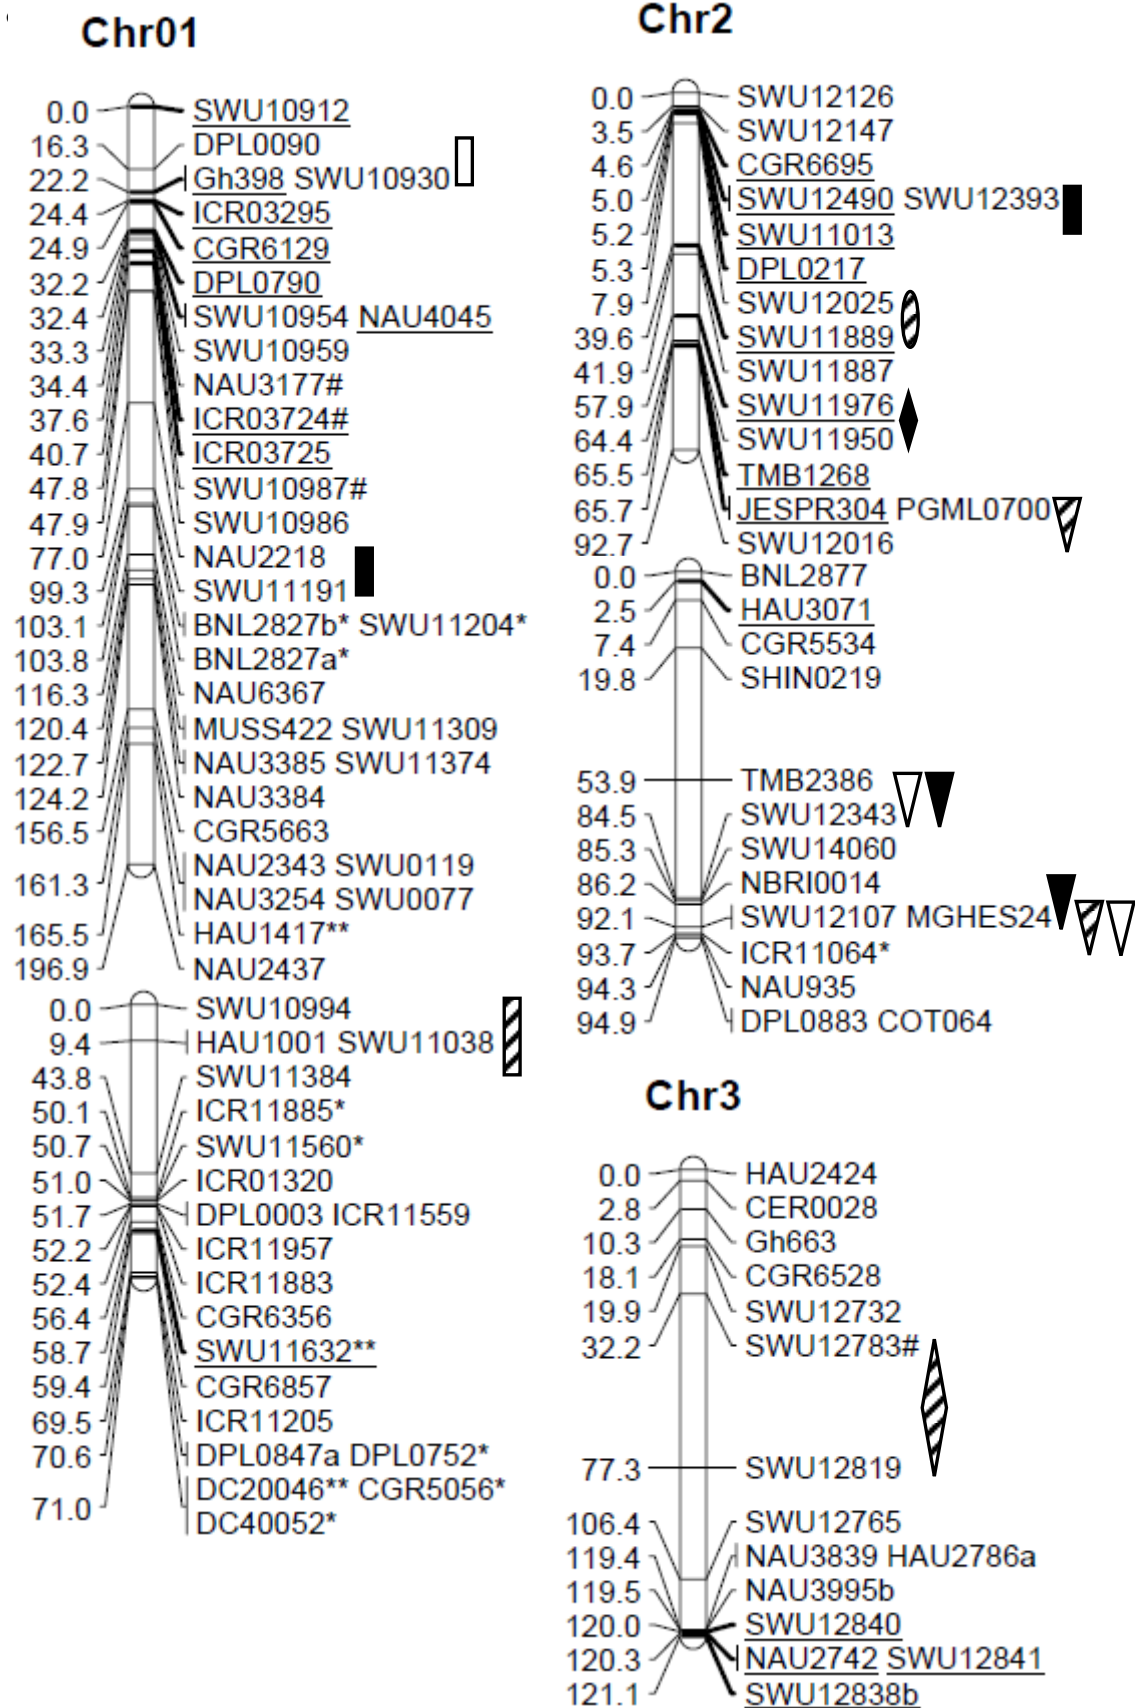

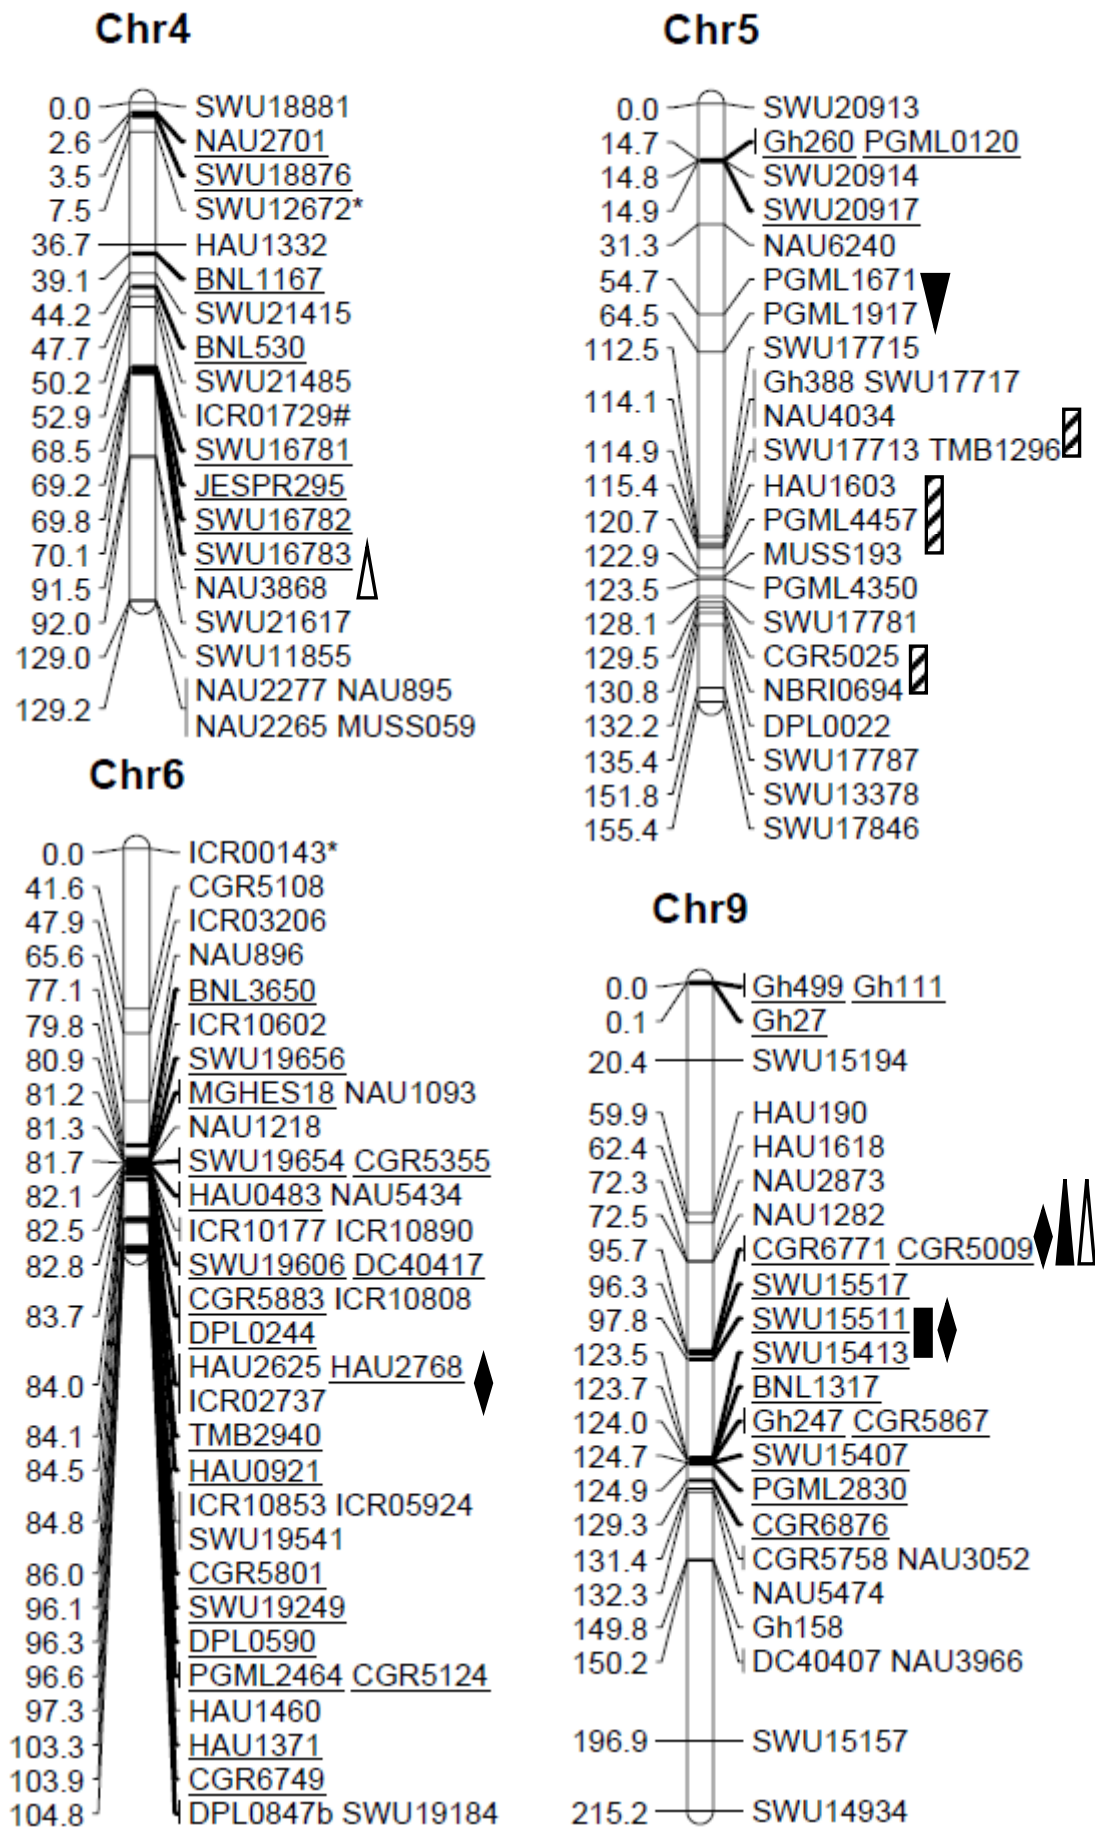



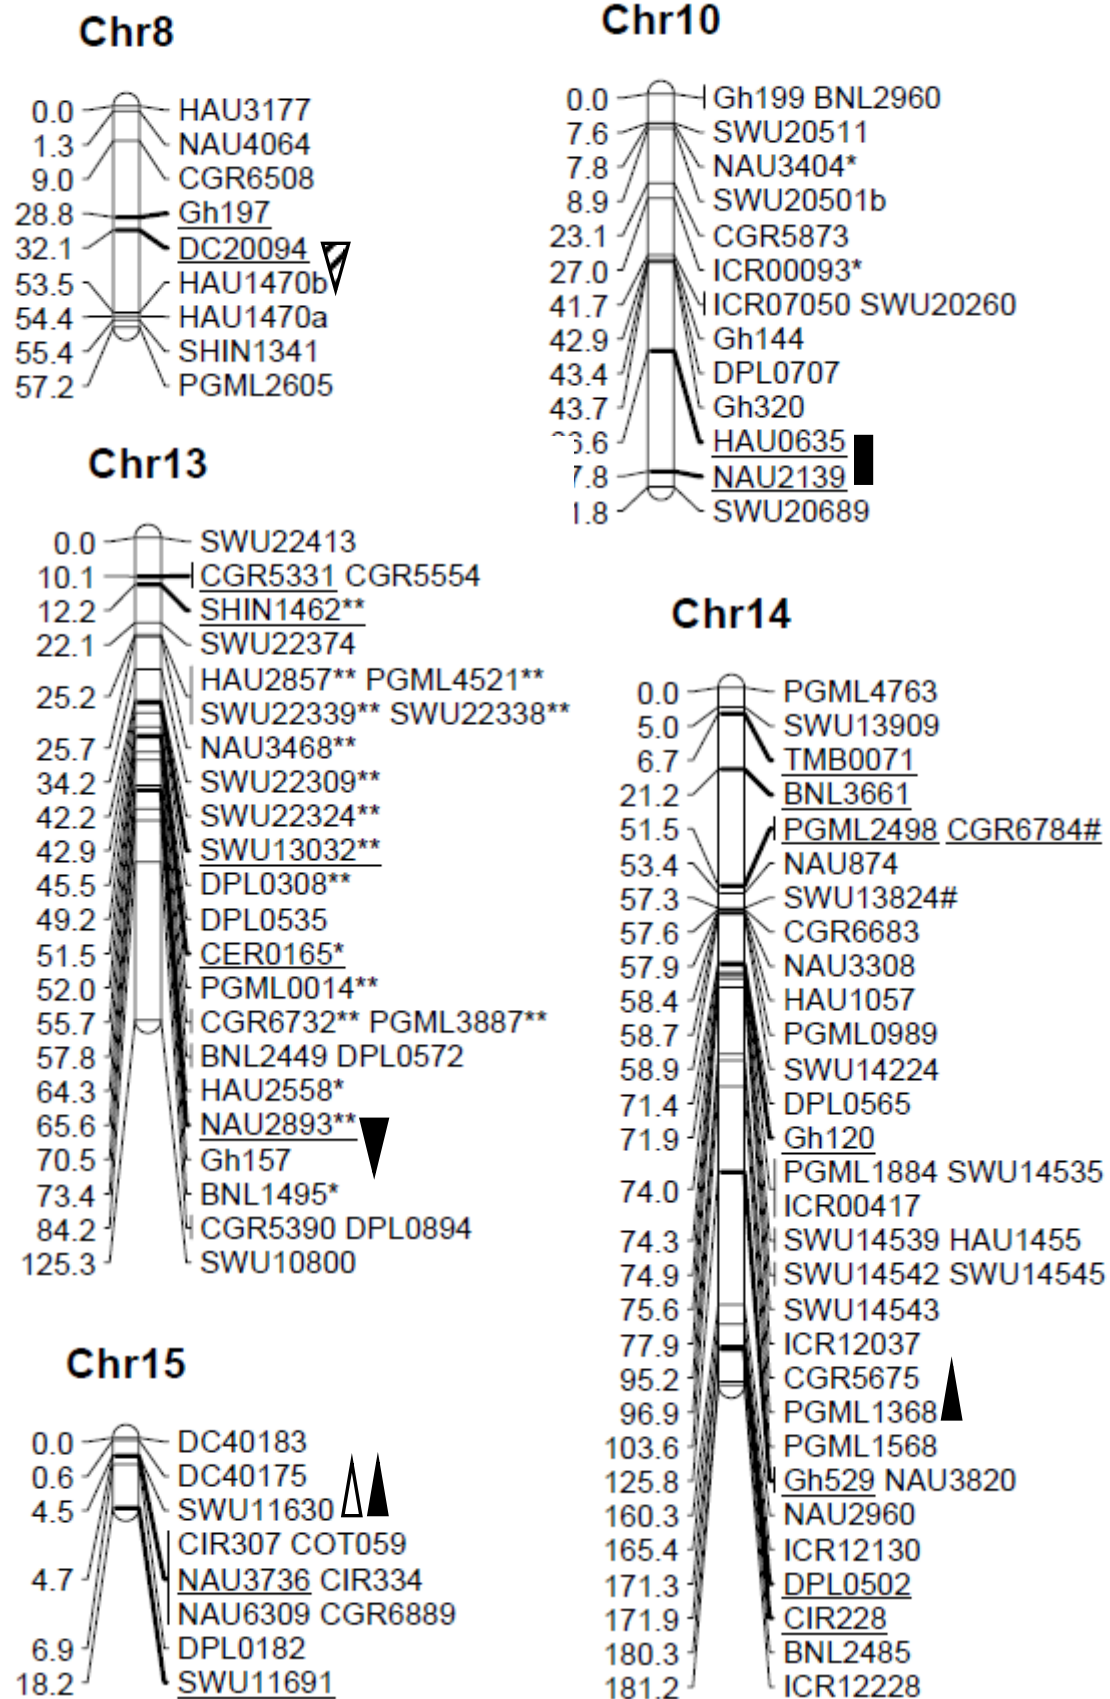

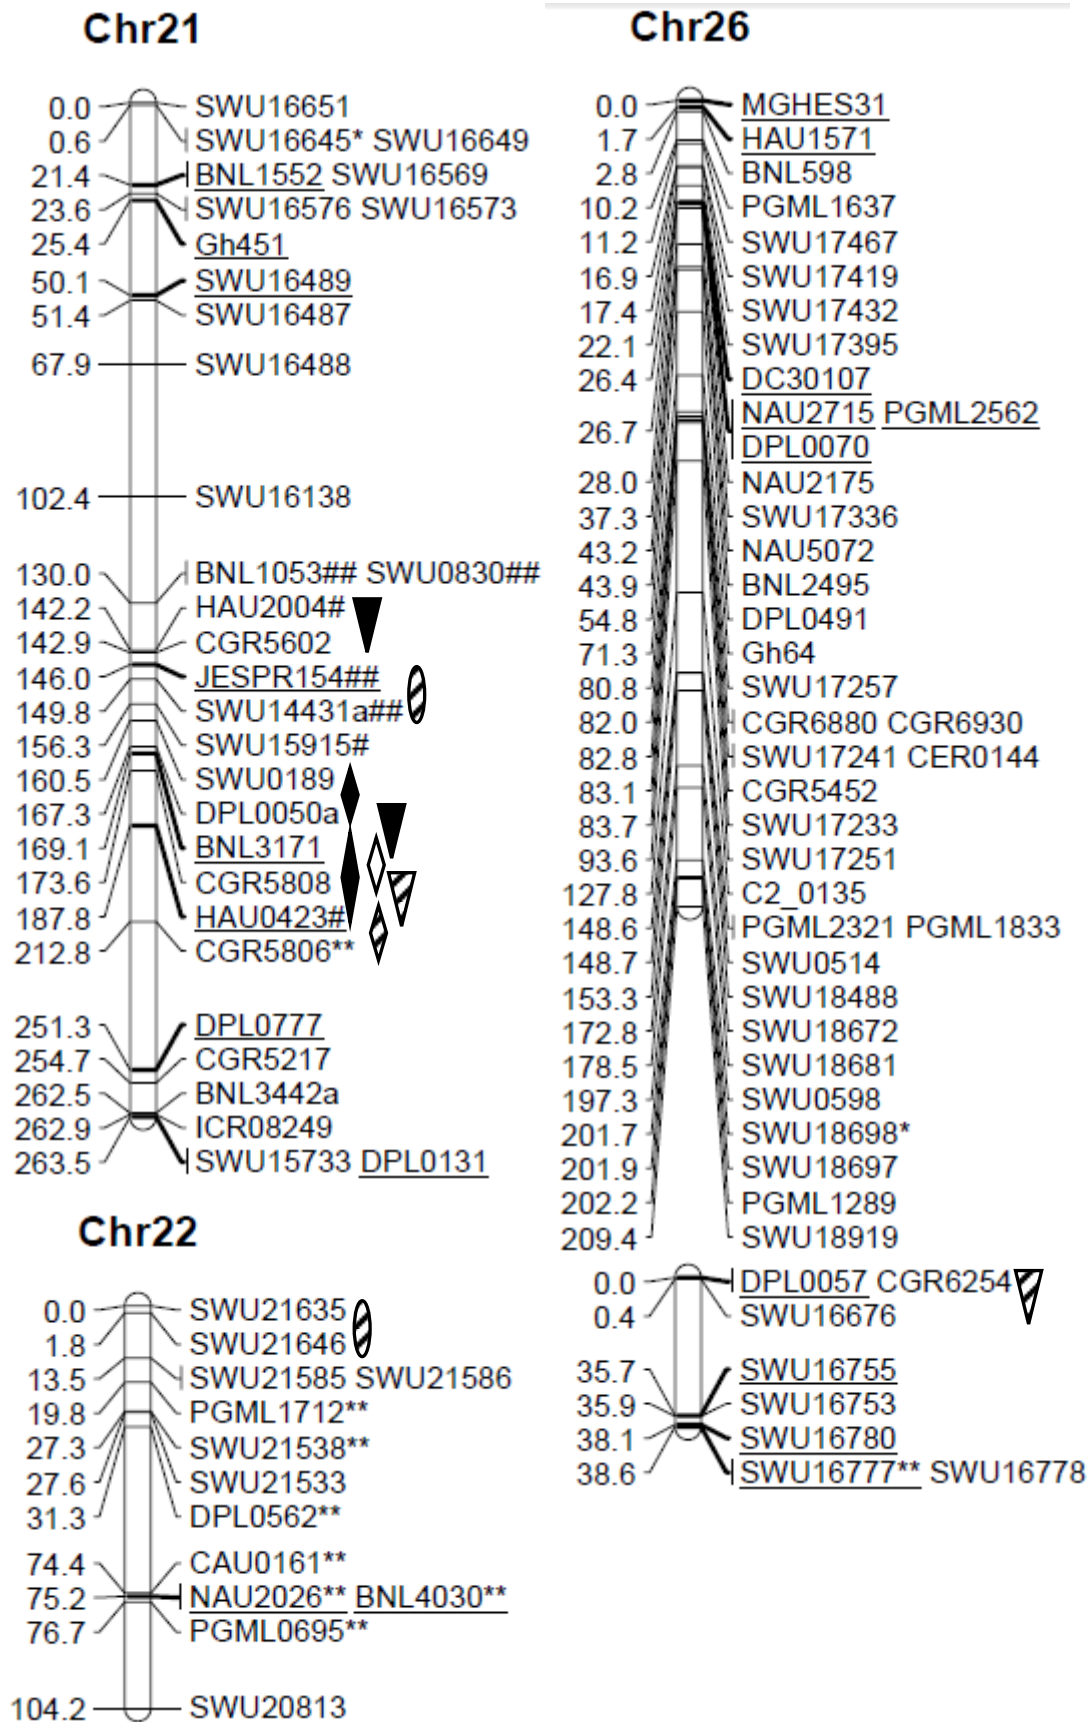

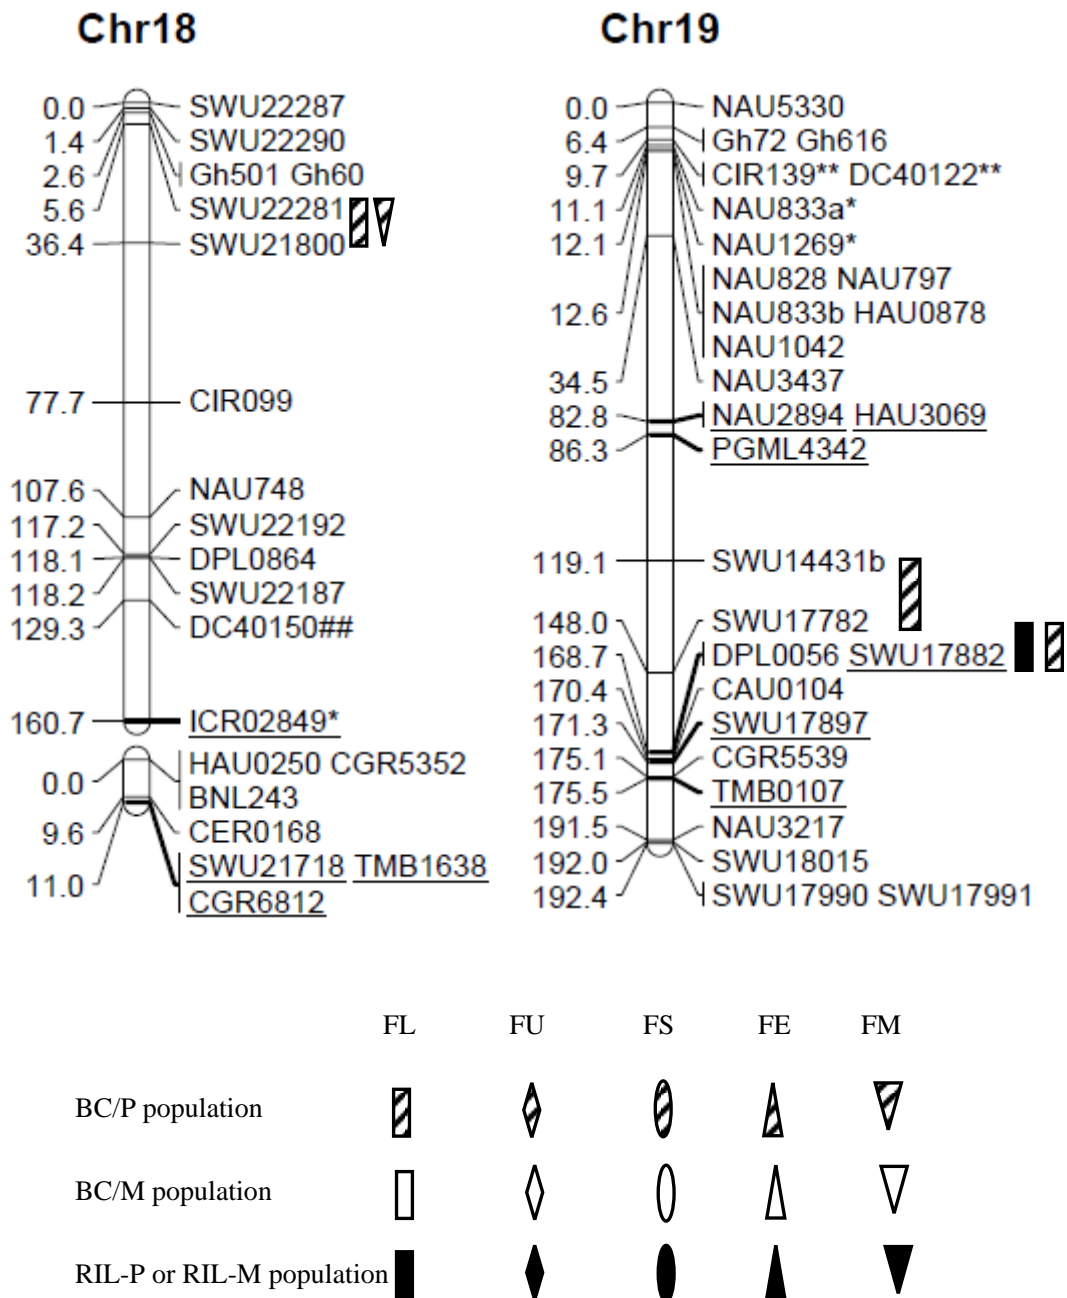

**Figure 1** Locations of QTLs controlling fiber quality traits in BC/P and BC/M trials

\* and \*\* (# and ##), marker showed respectively segregation distortion significant at P = 0.05 and 0.01 levels; markers with \* and \*\* skewed toward the GX1135 alleles, and markers with # and ## skewed toward the GX100-2 alleles.

Table 1 Descriptive statistical analysis of fiber quality traits in multiple populations and the control set

| Trait       | Env.          | BC/P              |                    |             | RIL-P             |                    |             | GX1135 | GX100-2 | Xinza 1 | Ruiza 816 |
|-------------|---------------|-------------------|--------------------|-------------|-------------------|--------------------|-------------|--------|---------|---------|-----------|
|             |               | Mean              | Range              | CV%         | Mean              | Range              | CV%         |        |         |         |           |
| FL/mm       | 2016E1        | 30.38±0.80        | 27.70-32.95        | 2.63        | 30.36±1.07        | 26.35-33.75        | 3.54        | 31.15  | 30.40   | 30.73   | 31.15     |
|             | 2015E2        | 31.08±0.69        | 29.20-33.00        | 2.21        | 30.95±0.95        | 28.60-33.20        | 3.07        | 30.44  | 30.10   | 31.05   | 31.15     |
|             | 2016E2        | 29.42±0.78        | 26.65-31.45        | 2.64        | 29.15±1.08        | 26.00-31.60        | 3.70        | 28.92  | 28.80   | 30.35   | 30.35     |
|             | <u>2016E2</u> | <u>29.26±0.95</u> | <u>26.50-31.70</u> | <u>3.25</u> | <u>29.14±1.2</u>  | <u>26.05-32.75</u> | <u>4.12</u> | 29.28  | 29.38   | 28.90   | 29.80     |
| FU          | 2016E1        | 86.28±0.76        | 83.75-88.30        | 0.88        | 85.99±0.85        | 82.85-88.05        | 0.98        | 86.43  | 85.43   | 85.78   | 86.43     |
|             | 2015E2        | 86.06±0.70        | 83.70-87.90        | 0.81        | 85.79±0.82        | 82.70-88.35        | 0.96        | 85.28  | 86.50   | 86.13   | 86.08     |
|             | 2016E2        | 85.29±1.02        | 81.75-87.40        | 1.20        | 84.95±1.05        | 80.85-87.05        | 1.23        | 84.60  | 85.35   | 85.45   | 86.00     |
|             | <u>2016E2</u> | <u>85.14±0.98</u> | <u>82.25-87.40</u> | <u>1.15</u> | <u>84.90±1.21</u> | <u>80.2-87.45</u>  | <u>1.42</u> | 85.43  | 86.05   | 85.05   | 86.20     |
| FS/(cN/tex) | 2016E1        | 28.81±0.94        | 26.05-30.85        | 3.25        | 28.99±1.25        | 24.65-32.30        | 4.32        | 31.85  | 30.13   | 30.23   | 31.85     |
|             | 2015E2        | 30.63±0.99        | 28.15-33.60        | 3.22        | 30.80±1.42        | 27.50-34.30        | 4.62        | 29.20  | 28.57   | 28.15   | 30.85     |
|             | 2016E2        | 29.11±1.02        | 26.45-32.45        | 3.50        | 29.03±1.38        | 25.6-33.90         | 4.75        | 28.50  | 28.70   | 30.18   | 31.08     |
|             | <u>2016E2</u> | <u>29.39±1.08</u> | <u>26.75-31.85</u> | <u>3.68</u> | <u>29.12±1.41</u> | <u>25.5-32.75</u>  | <u>4.83</u> | 29.20  | 28.35   | 29.28   | 31.10     |
| FE          | 2016E1        | 6.81±0.06         | 6.55-7.00          | 0.87        | 6.80±0.07         | 6.55-6.95          | 1.09        | 6.98   | 6.90    | 6.90    | 6.98      |
|             | 2015E2        | 6.99±0.06         | 6.85-7.20          | 0.84        | 6.99±0.08         | 6.80-7.25          | 1.16        | 6.78   | 6.77    | 6.83    | 6.78      |
|             | 2016E2        | 6.74±0.06         | 6.55-6.90          | 0.88        | 6.72±0.07         | 6.50-7.00          | 1.08        | 6.67   | 6.70    | 6.75    | 6.80      |
|             | <u>2016E2</u> | <u>6.72±0.07</u>  | <u>6.55-6.90</u>   | <u>0.99</u> | <u>6.71±0.08</u>  | <u>6.55-6.90</u>   | <u>1.17</u> | 6.73   | 6.70    | 6.70    | 6.75      |
| FM          | 2016E1        | 4.81±0.34         | 3.95-5.70          | 7.12        | 4.86±0.41         | 3.80-5.75          | 8.53        | 5.33   | 5.10    | 4.50    | 5.33      |
|             | 2015E2        | 4.76±0.27         | 4.15-5.40          | 5.59        | 4.71±0.36         | 3.65-5.65          | 7.65        | 5.06   | 5.10    | 5.35    | 5.18      |
|             | 2016E2        | 4.93±0.24         | 4.30-5.70          | 4.92        | 4.97±0.37         | 4.10-5.90          | 7.45        | 5.33   | 4.55    | 4.98    | 5.55      |
|             | <u>2016E2</u> | <u>5.18±0.25</u>  | <u>4.60-5.80</u>   | <u>4.80</u> | <u>5.02±0.36</u>  | <u>3.90-5.90</u>   | <u>7.04</u> | 5.40   | 5.13    | 5.00    | 5.38      |

Env., two testing locations (E1, Handan, E2, Cangzhou) in 2015 and 2016.

Mean referred to the mean value ± standard deviation. CV%, coefficient of variation.

Data without underline was from the recombinant inbred line (RIL-P) and backcross (BC/P) populations in paternal BC trials; Data with underlines was from the RIL-M and BC/M populations in maternal BC trials.

Table 2 Results of ANOVA and heritability for yield and its components in different populations from two backcross trials

| Trait | Source of variation | MS        |                    |           |        | MS        |           |        |           |        |
|-------|---------------------|-----------|--------------------|-----------|--------|-----------|-----------|--------|-----------|--------|
|       |                     | RIL-P     | $H^2$ <sup>§</sup> | BC/P      | $H^2$  | RIL-M     | $H^2$     | BC/M   | $H^2$     |        |
| FL    | G                   | 4.753**   | 91.82%             | 2.072**   | 86.63% | 2.072**   | 5.213**   | 91.78% | 2.021**   | 79.62% |
|       | E                   | 291.886** |                    | 240.054** |        | 240.054** | 269.064** |        | 297.752** |        |
|       | G×E                 | 0.864     |                    | 0.652     |        | 0.652     | 0.955     |        | 1.053     |        |
|       | Error               | 0.814     |                    | 0.615     |        | 0.615     | 0.888     |        | 0.998     |        |
| FU    | G                   | 1.880*    | 71.06%             | 1.490*    | 69.35% | 1.490*    | 2.828**   | 78.69% | 1.785*    | 72.00% |
|       | E                   | 110.536** |                    | 95.792**  |        | 95.792**  | 259.923** |        | 272.103** |        |
|       | G×E                 | 1.55      |                    | 1.368     |        | 1.368     | 1.524     |        | 1.364     |        |
|       | Error               | 1.494     |                    | 1.214     |        | 1.214     | 1.548     |        | 1.437     |        |
| FS    | G                   | 7.906**   | 91.10%             | 3.044**   | 81.93% | 3.044**   | 8.901**   | 89.71% | 4.039**   | 81.95% |
|       | E                   | 369.073** |                    | 333.408** |        | 333.408** | 159.82**  |        | 85.482**  |        |
|       | G×E                 | 1.625*    |                    | 1.365     |        | 1.365     | 2.07      |        | 1.71      |        |
|       | Error               | 1.381     |                    | 1.298     |        | 1.298     | 1.989     |        | 1.919     |        |
| FE    | G                   | 0.022**   | 86.83%             | 0.010**   | 79.87% | 0.010**   | 0.032**   | 88.26% | 0.014**   | 78.81% |
|       | E                   | 6.779**   |                    | 6.063**   |        | 6.063**   | 6.453**   |        | 6.614**   |        |
|       | G×E                 | 0.007     |                    | 0.005     |        | 0.005     | 0.009**   |        | 0.008     |        |
|       | Error               | 0.006     |                    | 0.005     |        | 0.005     | 0.007     |        | 0.007     |        |
| FM    | G                   | 0.576**   | 89.00%             | 0.261**   | 81.25% | 0.261**   | 0.439**   | 85.33% | 0.202**   | 76.37% |
|       | E                   | 6.24**    |                    | 2.636**   |        | 2.636**   | 11.665**  |        | 13.089**  |        |
|       | G×E                 | 0.154**   |                    | 0.117     |        | 0.117     | 0.158     |        | 0.131     |        |
|       | Error               | 0.119     |                    | 0.128     |        | 0.128     | 0.137     |        | 0.112     |        |

G, genotype, E, environment, G×E, genotype×environment. †Mean square. §Heritability.

‘\*’ and ‘\*\*’ indicate that the correlation is significant at 0.05 and 0.01 probability levels, respectively.

**Table 3** Correlation analyses between five fiber quality traits in RIL population and its TC progenies

| Trait | Env.          | FL              |                 | FU             |                | FS              |                 | FE              |               |
|-------|---------------|-----------------|-----------------|----------------|----------------|-----------------|-----------------|-----------------|---------------|
|       |               | RIL             | BC              | RIL            | BC             | RIL             | BC              | RIL             | BC            |
| FU    | 2016E1        | 0.013           | -0.096          |                |                |                 |                 |                 |               |
|       | 2015E2        | 0.226**         | 0.222**         |                |                |                 |                 |                 |               |
|       | 2016E2        | 0.497**         | 0.381**         |                |                |                 |                 |                 |               |
|       | <u>2016E2</u> | <u>0.438**</u>  | <u>0.178*</u>   |                |                |                 |                 |                 |               |
| FS    | 2016E1        | 0.656**         | 0.616**         | -0.030         | -0.083         |                 |                 |                 |               |
|       | 2015E2        | 0.718**         | 0.699**         | 0.217**        | 0.075          |                 |                 |                 |               |
|       | 2016E2        | 0.754**         | 0.581**         | 0.403**        | 0.060          |                 |                 |                 |               |
|       | <u>2016E2</u> | <u>0.784**</u>  | <u>0.525**</u>  | <u>0.305**</u> | <u>0.043</u>   |                 |                 |                 |               |
| FE    | 2016E1        | 0.659**         | 0.617**         | 0.128          | 0.105          | 0.530**         | 0.511**         |                 |               |
|       | 2015E2        | 0.627**         | 0.476**         | 0.369**        | 0.163*         | 0.507**         | 0.533**         |                 |               |
|       | 2016E2        | 0.754**         | 0.737**         | 0.454**        | 0.252**        | 0.710**         | 0.696**         |                 |               |
|       | <u>2016E2</u> | <u>0.813**</u>  | <u>0.535**</u>  | <u>0.414**</u> | <u>0.249**</u> | <u>0.751**</u>  | <u>0.486**</u>  |                 |               |
| FM    | 2016E1        | -0.237**        | -0.202**        | 0.295**        | 0.314**        | -0.320**        | -0.404**        | -0.015          | 0.016         |
|       | 2015E2        | -0.439**        | -0.334**        | 0.088          | 0.049          | -0.428**        | -0.390**        | -0.102          | 0.047         |
|       | 2016E2        | -0.443**        | -0.124          | -0.053         | 0.093          | -0.497**        | -0.261**        | -0.206**        | 0.004         |
|       | <u>2016E2</u> | <u>-0.426**</u> | <u>-0.277**</u> | <u>0.063</u>   | <u>0.142</u>   | <u>-0.434**</u> | <u>-0.482**</u> | <u>-0.219**</u> | <u>-0.020</u> |

‘\*’, ‘\*\*’ indicate that the correlation is significant at 0.05 and 0.01 probability levels, respectively.

RIL, recombinant inbred line population in maternal and paternal testcross trials, respectively; BC, backcross populations including maternal and paternal BC (BC/M and BC/P) populations.

Figures underlined referred to QTLs identified in one BC/M trial, the remaining QTLs identified in three BC/P trials.

Table 4 Single-locus QTLs in paternal and maternal backcross experiments by composite interval

| QTL                      | Env.          | Flanking markers |                | mapping method |              |              |      |              |       |
|--------------------------|---------------|------------------|----------------|----------------|--------------|--------------|------|--------------|-------|
|                          |               |                  |                | BC             |              |              | RIL  |              |       |
|                          |               |                  |                | LOD            | Effect value | Var%         | LOD  | Effect value | Var%  |
| <u><i>qFL-Chr1-1</i></u> | <u>2016E2</u> | <u>DPL0090</u>   | <u>Gh398</u>   | <u>4.57</u>    | <u>0.32</u>  | <u>10.66</u> |      |              |       |
| <i>qFL-Chr1-2</i>        | 2016E1        | NAU2218          | SWU11191       |                |              |              | 3.70 | 0.29         | 7.10  |
|                          | 2016E2        | NAU2218          | SWU11191       |                |              |              | 3.30 | 0.29         | 6.91  |
| <i>qFL-Chr1-3</i>        | 2015E2        | SWU10994         | HAU1001        | 3.24           | -0.19        | 7.76         |      |              |       |
|                          | 2015E2        | SWU11038         | SWU11384       | 3.33           | -0.26        | 14.77        |      |              |       |
| <i>qFL-Chr2-1</i>        | 2016E1        | SWU12393         | SWU11013       |                |              |              | 4.24 | 0.31         | 8.25  |
| <i>qFL-Chr2-2</i>        | 2016E1        | SWU11950         | TMB1268        | 3.05           | 0.19         | 5.70         |      |              |       |
| <i>qFL-Chr5-1</i>        | 2015E2        | NAU4034          | SWU17713       | 3.80           | 0.19         | 7.70         |      |              |       |
| <i>qFL-Chr5-2</i>        | 2016E1        | HAU1603          | PGML4457       | 3.55           | 0.22         | 7.46         |      |              |       |
|                          | 2015E2        | PGML4457         | MUSS193        | 3.44           | 0.19         | 7.82         |      |              |       |
| <i>qFL-Chr5-3</i>        | 2016E1        | CGR5025          | NBRI0694       | 5.57           | 0.26         | 10.49        |      |              |       |
| <i>qFL-Chr9-1</i>        | 2016E1        | SWU15511         | SWU15413       |                |              |              | 3.53 | -0.28        | 6.78  |
| <i>qFL-Chr10-1</i>       | 2016E1        | SWU20260         | Gh144          |                |              |              | 2.88 | -0.25        | 5.19  |
| <i>qFL-Chr10-2</i>       | 2016E2        | HAU0635          | NAU2139        |                |              |              | 4.76 | -0.52        | 17.90 |
| <i>qFL-Chr18-1</i>       | 2016E1        | SWU22290         | Gh501          |                |              |              | 3.10 | -0.26        | 5.91  |
| <i>qFL-Chr18-2</i>       | 2016E1        | SWU22281         | SWU21800       | 4.15           | -0.23        | 7.83         |      |              |       |
| <i>qFL-Chr19-1</i>       | 2015E2        | SWU14431b        | SWU17782       | 3.88           | 0.30         | 17.98        |      |              |       |
|                          | 2015E2        | SWU17782         | DPL0056        | 3.16           | 0.24         | 11.35        |      |              |       |
|                          | 2016E2        | SWU17782         | DPL0056        |                |              |              | 5.28 | 0.41         | 11.05 |
| <i>qFL-Chr21-1</i>       | 2016E2        | SWU0189          | DPL0050a       |                |              |              | 3.22 | -0.30        | 7.20  |
| <i>qFL-Chr24-1</i>       | 2016E1        | SWU13267         | BNL1521        | 2.81           | -0.21        | 6.66         |      |              |       |
| <i>qFL-Chr25-1</i>       | 2016E2        | BNL3594          | DPL0282        | 2.71           | -0.18        | 5.52         |      |              |       |
| <i>qFU-Chr2-1</i>        | 2016E1        | SWU12025         | SWU11889       | 3.91           | -0.28        | 11.30        |      |              |       |
| <i>qFU-Chr2-2</i>        | 2016E2        | MGHES24          | ICR11064       | 2.64           | 0.26         | 6.02         |      |              |       |
| <i>qFU-Chr4-1</i>        | 2016E1        | SWU16783         | NAU3868        |                |              |              | 2.86 | 0.24         | 7.76  |
| <u><i>qFU-Chr5-1</i></u> | <u>2016E2</u> | <u>TMB1296</u>   | <u>HAU1603</u> | <u>3.05</u>    | <u>0.26</u>  | <u>6.77</u>  |      |              |       |
| <i>qFU-Chr6-1</i>        | 2016E1        | DPL0244          | HAU2625        |                |              |              | 5.77 | 0.30         | 11.86 |



| QTL                | Env.          | Flanking markers |                 | BC          |              |             | RIL  |              |       |
|--------------------|---------------|------------------|-----------------|-------------|--------------|-------------|------|--------------|-------|
|                    |               |                  |                 | LOD         | Effect value | Var%        | LOD  | Effect value | Var%  |
| <i>qFU-Chr7-1</i>  | 2016E2        | NAU3181          | SHIN0376        |             |              |             | 2.60 | 0.27         | 6.51  |
| <i>qFU-Chr9-1</i>  | 2016E1        | NAU1282          | CGR6771         |             |              |             | 2.77 | 0.20         | 5.40  |
| <i>qFU-Chr11-1</i> | 2016E2        | TMB0628          | HAU0639         |             |              |             | 2.57 | 0.24         | 5.23  |
| <i>qFU-Chr13-1</i> | <u>2016E2</u> | <u>SWU22309</u>  | <u>SWU22324</u> | <u>2.52</u> | <u>-0.24</u> | <u>5.72</u> |      |              |       |
| <i>qFU-Chr14-1</i> | 2016E2        | CIR228           | BNL2485         | 2.67        | 0.25         | 5.53        |      |              |       |
| <i>qFU-Chr21-1</i> | 2015E2        | SWU0830          | HAU2004         | 3.51        | 0.22         | 9.05        |      |              |       |
| <i>qFU-Chr21-2</i> | 2015E2        | JESPR154         | SWU14431a       | 3.99        | 0.22         | 8.76        |      |              |       |
| <i>qFU-Chr22-1</i> | 2015E2        | SWU21635         | SWU21646        | 4.24        | 0.22         | 8.86        |      |              |       |
| <i>qFU-Chr22-2</i> | 2015E2        | SWU21533         | DPL0562         | 2.77        | -0.18        | 5.69        |      |              |       |
| <i>qFS-Chr1-1</i>  | 2016E2        | NAU3384          | CGR5663         |             |              |             | 2.94 | 0.52         | 13.70 |
| <i>qFS-Chr2-1</i>  | 2016E2        | SWU11976         | SWU11950        |             |              |             | 3.96 | 0.45         | 9.66  |
| <i>qFS-Chr3-1</i>  | 2016E2        | SWU12783         | SWU12819        | 3.84        | 0.48         | 22.09       |      |              |       |
| <i>qFS-Chr5-1</i>  | 2016E1        | NAU6240          | PGML1671        |             |              |             | 2.73 | 0.38         | 9.23  |
|                    | 2016E2        | NAU6240          | PGML1671        |             |              |             | 3.23 | 0.46         | 11.01 |
| <i>qFS-Chr9-1</i>  | 2016E1        | NAU1282          | CGR6771         |             |              |             | 4.75 | -0.46        | 13.20 |
|                    | 2016E2        | NAU1282          | CGR6771         |             |              |             | 2.97 | -0.47        | 11.30 |
| <i>qFS-Chr9-2</i>  | 2016E1        | SWU15511         | SWU15413        |             |              |             | 5.08 | -0.41        | 10.04 |
| <i>qFS-Chr20-1</i> | 2016E1        | CGR5548          | SWU20675        |             |              |             | 2.89 | -0.31        | 5.90  |
| <i>qFS-Chr21-1</i> | 2016E2        | SWU0189          | DPL0050a        |             |              |             | 3.40 | -0.41        | 8.42  |
| <i>qFS-Chr21-2</i> | <u>2016E2</u> | <u>BNL3171</u>   | <u>CGR5808</u>  | <u>2.97</u> | <u>-0.29</u> | <u>6.90</u> | 2.89 | -0.35        | 6.27  |
|                    | 2016E1        | CGR5808          | HAU0423         |             |              |             | 5.31 | -0.46        | 13.37 |
|                    | 2016E2        | CGR5808          | HAU0423         |             |              |             | 4.24 | -0.44        | 9.62  |
|                    | 2016E2        | HAU0423          | CGR5806         | 5.18        | -0.34        | 10.14       |      |              |       |
| <i>qFS-Chr21-2</i> | 2016E2        | CGR5217          | BNL3442a        | 2.87        | -0.25        | 5.62        |      |              |       |
| <i>qFE-Chr1-1</i>  | 2016E1        | NAU2218          | SWU11191        |             |              |             | 2.61 | 0.02         | 5.13  |
| <i>qFE-Chr2-1</i>  | 2016E1        | PGML0700         | SWU12016        | 3.62        | 0.02         | 6.90        |      |              |       |
| <i>qFE-Chr2-2</i>  | 2016E1        | TMB2386          | SWU12343        |             |              |             | 5.46 | 0.04         | 22.42 |
|                    | <u>2016E2</u> | <u>TMB2386</u>   | <u>SWU12343</u> | <u>2.53</u> | <u>0.02</u>  | <u>5.71</u> |      |              |       |
| <i>qFE-Chr2-3</i>  | 2016E1        | NBRI0014         | SWU12107        |             |              |             | 3.99 | 0.02         | 8.03  |
|                    | 2016E2        | MGHES24          | ICR11064        | 2.70        | 0.01         | 5.66        |      |              |       |

| QTL                       | Env.          | Flanking markers |                 | BC          |              |              | RIL  |              |       |
|---------------------------|---------------|------------------|-----------------|-------------|--------------|--------------|------|--------------|-------|
|                           |               |                  |                 | LOD         | Effect value | Var%         | LOD  | Effect value | Var%  |
|                           | <u>2016E2</u> | <u>MGHES24</u>   | <u>ICR11064</u> | <u>3.47</u> | <u>0.02</u>  | <u>7.37</u>  |      |              |       |
| <b><i>qFE-Chr3-1</i></b>  | 2016E2        | SWU12783         | SWU12819        | 4.79        | 0.02         | 12.17        |      |              |       |
|                           | 2016E2        | SWU12819         | SWU12765        | <u>2.72</u> | <u>-0.02</u> | <u>8.84</u>  |      |              |       |
| <i>qFE-Chr5-1</i>         | 2016E2        | PGML1671         | PGML1917        |             |              |              | 3.72 | 0.02         | 7.75  |
| <i>qFE-Chr13-1</i>        | 2016E1        | NAU2893          | Gh157           |             |              |              | 3.48 | 0.02         | 7.02  |
| <i>qFE-Chr13-2</i>        | 2016E1        | BNL1495          | CGR5390         |             |              |              | 2.96 | 0.02         | 7.77  |
| <i>qFE-Chr15-1</i>        | 2016E2        | DPL0182          | SWU11691        | 2.63        | 0.02         | 6.60         |      |              |       |
| <i>qFE-Chr18-1</i>        | 2016E1        | SWU22281         | SWU21800        | 2.59        | -0.01        | 5.01         |      |              |       |
| <i>qFE-Chr21-1</i>        | 2016E2        | HAU2004          | CGR5602         |             |              |              | 4.41 | 0.03         | 9.19  |
| <b><i>qFE-Chr21-2</i></b> | 2016E1        | CGR5808          | HAU0423         | 3.02        | -0.01        | 5.77         |      |              |       |
|                           | 2016E2        | DPL0050a         | BNL3171         |             |              |              | 4.54 | -0.03        | 9.48  |
| <i>qFE-Chr24-1</i>        | 2016E1        | SWU13267         | BNL1521         | 3.24        | -0.02        | 6.20         |      |              |       |
| <i>qFE-Chr26-1</i>        | 2015E2        | CGR6254          | SWU16676        | 3.90        | 0.02         | 8.49         |      |              |       |
| <i>qFM-Chr1-2</i>         | 2016E2        | CGR5663          | NAU2343         | 2.79        | 0.06         | 5.80         |      |              |       |
| <i>qFM-Chr2-1</i>         | 2015E2        | SWU12025         | SWU11889        | 3.25        | -0.09        | 12.38        |      |              |       |
| <u><i>qFM-Chr4-1</i></u>  | <u>2016E2</u> | <u>JESPR295</u>  | <u>SWU16782</u> | <u>2.50</u> | <u>0.08</u>  | <u>5.31</u>  |      |              |       |
| <u><i>qFM-Chr4-2</i></u>  | <u>2016E2</u> | <u>SWU16783</u>  | <u>NAU3868</u>  | <u>3.98</u> | <u>0.13</u>  | <u>13.96</u> |      |              |       |
| <i>qFM-Chr5-1</i>         | 2016E2        | PGML1671         | PGML1917        | 3.25        | -0.07        | 8.30         |      |              |       |
| <i>qFM-Chr8-1</i>         | 2016E1        | DC20094          | HAU1470b        | 3.49        | -0.09        | 7.00         |      |              |       |
| <i>qFM-Chr9-1</i>         | 2016E1        | HAU190           | HAU1618         |             |              |              | 2.59 | 0.10         | 5.30  |
| <b><i>qFM-Chr9-2</i></b>  | 2015E2        | NAU1282          | CGR6771         |             |              |              | 2.83 | 0.12         | 5.96  |
|                           | 2016E1        | NAU2873          | NAU1282         |             |              |              | 4.16 | 0.12         | 7.70  |
|                           | <u>2016E2</u> | <u>NAU2873</u>   | <u>NAU1282</u>  | <u>3.65</u> | <u>0.10</u>  | <u>7.81</u>  | 4.98 | 0.12         | 10.34 |
|                           | <u>2016E2</u> | <u>NAU1282</u>   | <u>CGR6771</u>  | <u>3.85</u> | <u>0.14</u>  | <u>14.53</u> | 5.94 | 0.18         | 21.91 |
| <i>qFM-Chr10-1</i>        | 2016E1        | SWU20501b        | CGR5873         | 3.33        | 0.11         | 9.21         |      |              |       |
| <i>qFM-Chr10-2</i>        | 2016E1        | ICR00093         | ICR07050        | 2.77        | 0.08         | 5.56         |      |              |       |
| <i>qFM-Chr12-1</i>        | 2016E1        | Gh631            | HAU1321         |             |              |              | 3.16 | 0.13         | 9.45  |
| <i>qFM-Chr14-1</i>        | 2016E1        | CGR5675          | PGML1368        |             |              |              | 4.04 | 0.12         | 8.04  |
| <i>qFM-Chr14-2</i>        | 2016E1        | PGML1568         | Gh529           |             |              |              | 3.06 | 0.13         | 9.23  |
| <b><i>qFM-Chr15-1</i></b> | 2016E1        | DC40175          | SWU11630        |             |              |              | 6.04 | 0.15         | 12.36 |

| QTL                | Env.          | Flanking markers |                 | BC          |              |             | RIL |              |      |
|--------------------|---------------|------------------|-----------------|-------------|--------------|-------------|-----|--------------|------|
|                    |               |                  |                 | LOD         | Effect value | Var%        | LOD | Effect value | Var% |
|                    | <u>2016E2</u> | <u>DC40175</u>   | <u>SWU11630</u> | <u>2.57</u> | <u>0.06</u>  | <u>5.46</u> |     |              |      |
| <i>qFM-Chr21-1</i> | 2015E2        | SWU0189          | DPL0050a        | 3.34        | 0.07         | 6.94        |     |              |      |
| <i>qFM-Chr26-1</i> | 2016E1        | Gh64             | SWU17257        | 3.09        | -0.09        | 7.61        |     |              |      |

These single locus QTLs were detected by the software QTL Cartographer (version 2.5). Env.: Environment in 2015 and 2016; E1: Handan; E2: Cangzhou. RIL, recombinant inbred line population in maternal and paternal backcross trials, respectively; BC, backcross populations including maternal and paternal BC (BC/M and BC/P) populations. Bold figures indicated the stable QTL detected in more than two environments or populations simultaneously. Figures underlined referred to QTLs identified in BC/M population in 2016E2, the remaining QTLs identified in BC/P population. Effect value: the genetic expectation of one QTL effect when estimated from the mean values of populations, additive effect in RIL population and the additive and dominance effects in BC populations. Var (%), phenotypic variation explained by a single QTL.

Table 5 Summary on M-QTL and E-QTLs controlling fiber quality traits in BC/P and RIL-P datasets in BC/P trials

| Trait              | BC/P |        |         | RIL-P          |                     |         |
|--------------------|------|--------|---------|----------------|---------------------|---------|
|                    | n    | V(A)%  | V(AE)%  | n <sup>b</sup> | V(A)% <sup>c</sup>  | V(AE)%  |
| M-QTL <sup>a</sup> |      |        |         |                |                     |         |
| FL                 | 11   | 3.13   | 0.70    | 13             | 2.63                | 0.27    |
| FU                 | 3    | 3.02   | 3.00    | 7              | 3.15                | 2.40    |
| FS                 | 11   | 2.53   | 0.67    | 14             | 2.92                | 0.25    |
| FE                 | 0    | -      | -       | 12             | 2.77                | 0.59    |
| FM                 | 13   | 2.61   | 0.99    | 10             | 3.41                | 1.01    |
| Mean               | -    | 2.82   | 1.34    | -              | 2.98                | 0.90    |
| E-QTL <sup>a</sup> | n    | V(AA)% | V(AAE)% | n              | V(AA)% <sup>c</sup> | V(AAE)% |
| FL                 | 16   | 3.44   | 0.30    | 52             | 4.33                | 0.22    |
| FU                 | 11   | 1.93   | 2.12    | 0              | -                   | -       |
| FS                 | 5    | 3.32   | 0.52    | 44             | 4.15                | 0.24    |
| FE                 | 1    | 0.76   | 0.01    | 18             | 4.42                | 0.24    |
| FM                 | 13   | 3.44   | 0.73    | 28             | 3.77                | 0.23    |
| Mean               | -    | 2.58   | 0.74    | -              | 4.17                | 0.23    |

<sup>a</sup> M-QTLs and E-QTLs refer to the main effect QTL and epistasis QTLs by environments.

<sup>b</sup> The number of QTLs.

<sup>c</sup> V(A)%, V(AAE)%, V(AA)% and V(AAE)%, the total proportion of phenotypic variation on average explained by single QTL, epistatic QTLs (AA) and them by environments (AE or AAE) at the current scanning position, respectively.

Table 6 Types of epistasis detected for fiber quality traits in the RIL-P and BC/P populations

| Trait            | Type of epistasis <sup>a</sup> |    |     |       |      |    |     |       |
|------------------|--------------------------------|----|-----|-------|------|----|-----|-------|
|                  | RIL-P                          |    |     |       | BC/P |    |     |       |
|                  | I                              | II | III | Total | I    | II | III | Total |
| Fiber length     | 8                              | 29 | 15  | 52    | 2    | 5  | 9   | 16    |
| Fiber uniformity | 0                              | 0  | 0   | 0     | 2    | 5  | 4   | 11    |
| Fiber strength   | 10                             | 22 | 12  | 44    | 0    | 1  | 5   | 6     |
| Fiber elongation | 4                              | 6  | 8   | 18    | 0    | 0  | 1   | 1     |
| Micronaire       | 5                              | 17 | 6   | 28    | 1    | 4  | 8   | 13    |
| Total            | 27                             | 74 | 31  | 142   | 5    | 15 | 27  | 47    |

<sup>a</sup> type I, both loci were M-QTLs, type II, either locus among two loci was M-QTL, and type III, both loci were no

M-QTLs.

**Table S2** Epitasis effects and environmental interactions detected for yield and its components in RIL-P population

| Trait | Chri     | Left Marker | Right Marker | Chrij    | Left Marker | Right Marker | LOD  | V(AA) |
|-------|----------|-------------|--------------|----------|-------------|--------------|------|-------|
| FL    | 1        | CGR6129     | DPL0790      | 3        | SWU12840    | NAU2742      | 5.81 | 4.27  |
|       | 1        | SWU10912    | DPL0090      | 4        | BNL1167     | SWU21415     | 5.27 | 3.53  |
|       | 3        | SWU12840    | NAU2742      | 6        | SWU19541    | CGR5801      | 5.26 | 4.00  |
|       | 5        | PGML1671    | PGML1917     | 9        | NAU1282     | CGR6771      | 6.99 | 5.35  |
|       | 9        | CGR6876     | CGR5758      | 9        | SWU15157    | SWU14934     | 5.40 | 3.61  |
|       | 3        | SWU12783    | SWU12819     | 11       | CGR5421     | ICR08245     | 5.26 | 4.02  |
|       | 5        | CGR5025     | NBRI0694     | 11       | NAU3695     | DPL0050b     | 5.08 | 3.88  |
|       | 1        | CGR5663     | NAU2343      | 11       | NAU1014     | ICR10344     | 5.25 | 4.02  |
|       | 11       | PGML2202    | CGR6580      | 12       | NAU943      | DPL0303      | 5.33 | 3.97  |
|       | 6        | CGR5801     | SWU19249     | 12       | DPL0303     | COT107       | 5.24 | 3.85  |
|       | 5        | SWU20917    | NAU6240      | 14       | SWU14224    | DPL0565      | 6.29 | 4.56  |
|       | 13       | BNL1495     | CGR5390      | 14       | SWU14224    | DPL0565      | 5.95 | 4.52  |
|       | 1        | HAU1417     | NAU2437      | 14       | NAU3820     | NAU2960      | 5.80 | 4.14  |
|       | 11       | SWU15972    | TMB0628      | 15       | DPL0182     | SWU11691     | 7.81 | 5.88  |
|       | 7        | CER0036     | PGML1916     | 16       | HAU1129     | NAU2984      | 5.68 | 3.83  |
|       | 14       | SWU14545    | SWU14543     | 16       | ICR00010    | SWU10038     | 5.56 | 3.95  |
|       | 4        | SWU18881    | NAU2701      | 17       | ICR03391    | SWU12838a    | 6.95 | 5.01  |
|       | 12       | HAU1316     | NAU3519      | 17       | ICR03391    | SWU12838a    | 5.83 | 3.98  |
|       | 1        | NAU6367     | MUSS422      | 17       | NAU3765     | SWU14627     | 5.80 | 3.80  |
|       | 1        | NAU3177     | ICR03724     | 18       | SWU21800    | CIR099       | 5.09 | 4.03  |
|       | 11       | SWU15972    | TMB0628      | 19       | NAU3437     | NAU2894      | 5.78 | 4.48  |
|       | 3        | SWU12840    | NAU2742      | 21       | SWU16487    | SWU16488     | 7.12 | 5.14  |
|       | 12       | DPL0732     | Gh631        | 21       | SWU0189     | DPL0050a     | 9.78 | 6.47  |
|       | 11       | NAU1014     | ICR10344     | 21       | CGR5217     | BNL3442a     | 5.46 | 4.00  |
|       | 11       | SWU15972    | TMB0628      | 22       | DPL0562     | CAU0161      | 5.16 | 3.77  |
|       | 17       | SWU12818    | CGR5576      | 24       | CGR5202     | Gh298        | 5.40 | 3.32  |
|       | 10       | HAU0635     | NAU2139      | 24       | PGML4657    | Gh454        | 5.24 | 4.00  |
|       | 1        | HAU1417     | NAU2437      | 24       | SWU13267    | BNL1521      | 6.26 | 4.89  |
|       | 19       | NAU3437     | NAU2894      | 24       | HAU2504     | SWU13736     | 5.54 | 4.24  |
|       | 5        | SWU20913    | Gh260        | 25       | SWU19848    | CGR6864      | 5.90 | 3.88  |
|       | 22       | PGML0695    | SWU20813     | 25       | DPL0282     | SWU19763     | 7.18 | 5.38  |
|       | 21       | CGR5808     | HAU0423      | 25       | Gh220       | SWU19434     | 5.98 | 3.80  |
|       | 18       | CIR099      | NAU748       | 26       | BNL598      | PGML1637     | 6.33 | 4.77  |
|       | 21       | SWU0830     | HAU2004      | 26       | DPL0491     | Gh64         | 7.30 | 4.86  |
|       | 22       | DPL0562     | CAU0161      | 26       | Gh64        | SWU17257     | 6.70 | 4.96  |
|       | 12       | DPL0732     | Gh631        | 26       | SWU17233    | SWU17251     | 5.05 | 3.75  |
|       | 14       | NAU874      | SWU13824     | 26       | C2_0135     | PGML2321     | 5.38 | 3.71  |
|       | 13       | SWU22413    | CGR5331      | 26       | SWU18488    | SWU18672     | 8.22 | 6.19  |
|       | 19       | SWU17882    | CAU0104      | 26       | SWU18672    | SWU18681     | 5.74 | 4.37  |
|       | 23       | SWU14807    | PGML4185     | 26       | SWU18681    | SWU0598      | 5.68 | 4.40  |
| 5     | PGML1917 | SWU17715    | 27           | ICR11883 | CGR6356     | 5.88         | 4.52 |       |
| 22    | SWU21635 | SWU21646    | 28           | BNL2877  | HAU3071     | 7.19         | 5.24 |       |
| 16    | SWU10056 | SWU10037    | 28           | HAU3071  | CGR5534     | 5.06         | 3.71 |       |
| 4     | SWU18876 | SWU12672    | 28           | CGR5534  | SHIN0219    | 6.58         | 4.77 |       |
| 24    | SWU13745 | Gh273       | 28           | CGR5534  | SHIN0219    | 5.66         | 3.77 |       |
| 2     | PGML0700 | SWU12016    | 28           | CGR5534  | SHIN0219    | 5.69         | 4.21 |       |
| 3     | SWU12819 | SWU12765    | 28           | SHIN0219 | TMB2386     | 5.66         | 4.20 |       |
| 9     | NAU1282  | CGR6771     | 29           | DC20127  | DPL0252     | 6.06         | 4.45 |       |
| 20    | SWU20246 | SWU20501a   | 29           | BNL3261  | CGR5111     | 5.39         | 3.85 |       |





|    |    |                 |                 |    |                 |                 |       |      |
|----|----|-----------------|-----------------|----|-----------------|-----------------|-------|------|
|    | 3  | <b>CER0028</b>  | Gh663           | 15 | <b>CGR6889</b>  | <u>DPL0182</u>  | 7.02  | 5.47 |
|    | 13 | DPL0894         | SWU10800        | 16 | SWU10627        | PGML1309        | 5.20  | 4.09 |
|    | 11 | <u>NAU2152</u>  | <u>NAU5428</u>  | 19 | <b>SWU17882</b> | <b>CAU0104</b>  | 6.21  | 4.92 |
|    | 6  | <b>ICR00143</b> | <b>CGR5108</b>  | 21 | <b>SWU0830</b>  | <b>HAU2004</b>  | 5.74  | 4.67 |
|    | 1  | DPL0090         | Gh398           | 21 | <b>SWU0830</b>  | <b>HAU2004</b>  | 5.37  | 4.13 |
|    | 19 | <b>SWU17882</b> | <b>CAU0104</b>  | 21 | <b>CGR5217</b>  | BNL3442a        | 6.71  | 5.36 |
|    | 9  | NAU5474         | Gh158           | 22 | PGML1712        | SWU21538        | 5.41  | 4.01 |
|    | 19 | NAU3437         | NAU2894         | 24 | BNL1521         | HAU2504         | 5.17  | 4.10 |
|    | 24 | SWU13150        | <u>PGML4657</u> | 24 | SWU13745        | Gh273           | 5.06  | 4.13 |
|    | 11 | CER0098         | CGR5421         | 26 | SWU18488        | SWU18672        | 5.34  | 3.73 |
|    | 19 | <b>SWU17882</b> | <b>CAU0104</b>  | 26 | <b>SWU18681</b> | <b>SWU0598</b>  | 6.36  | 4.52 |
|    | 3  | HAU2424         | <b>CER0028</b>  | 26 | <b>SWU18681</b> | <b>SWU0598</b>  | 5.43  | 4.14 |
|    | 7  | NAU1357         | SWU10067        | 27 | ICR11205        | DPL0847a        | 5.09  | 4.19 |
|    | 12 | NAU943          | <b>DPL0303</b>  | 28 | <b>NBRI0014</b> | SWU12107        | 6.39  | 4.76 |
| FM | 2  | SWU11889        | SWU11887        | 11 | <b>NAU2152</b>  | <b>NAU5428</b>  | 5.22  | 3.25 |
|    | 10 | HAU0635         | NAU2139         | 11 | <b>NAU2152</b>  | <b>NAU5428</b>  | 6.08  | 3.86 |
|    | 6  | CGR5801         | SWU19249        | 11 | CER0098         | CGR5421         | 5.07  | 3.31 |
|    | 9  | HAU190          | <u>HAU1618</u>  | 11 | NAU3695         | DPL0050b        | 5.81  | 3.63 |
|    | 7  | NAU1357         | <b>SWU10067</b> | 11 | <b>CGR6580</b>  | <b>SWU15972</b> | 5.79  | 3.78 |
|    | 5  | <b>CGR5025</b>  | <b>NBRI0694</b> | 13 | <b>DPL0535</b>  | CER0165         | 7.51  | 4.44 |
|    | 3  | <b>SWU12732</b> | <b>SWU12783</b> | 14 | <b>SWU13909</b> | <b>TMB0071</b>  | 5.62  | 3.49 |
|    | 5  | SWU20913        | Gh260           | 14 | <b>TMB0071</b>  | BNL3661         | 5.69  | 3.19 |
|    | 14 | <b>SWU13909</b> | <b>TMB0071</b>  | 16 | ICR00010        | SWU10038        | 5.91  | 3.70 |
|    | 1  | NAU3384         | <b>CGR5663</b>  | 17 | NAU3765         | SWU14627        | 5.74  | 3.52 |
|    | 1  | <b>CGR5663</b>  | NAU2343         | 18 | SWU22287        | SWU22290        | 7.40  | 4.67 |
|    | 5  | <b>CGR5025</b>  | <b>NBRI0694</b> | 18 | DC40150         | ICR02849        | 7.72  | 4.83 |
|    | 3  | SWU12819        | SWU12765        | 19 | HAU3069         | PGML4342        | 5.75  | 3.17 |
|    | 9  | Gh27            | SWU15194        | 20 | SWU1259         | SWU20033        | 5.23  | 3.46 |
|    | 13 | SWU22309        | SWU22324        | 20 | <b>SWU20035</b> | <b>DPL0319</b>  | 6.07  | 2.96 |
|    | 7  | NAU1357         | <b>SWU10067</b> | 21 | Gh451           | SWU16489        | 5.98  | 3.38 |
|    | 9  | NAU3966         | SWU15157        | 21 | SWU16488        | <b>SWU16138</b> | 5.46  | 2.74 |
|    | 8  | CGR6508         | Gh197           | 21 | <b>SWU16138</b> | <b>BNL1053</b>  | 6.88  | 4.36 |
|    | 12 | NAU943          | DPL0303         | 21 | <b>SWU16138</b> | <b>BNL1053</b>  | 6.66  | 4.31 |
|    | 19 | NAU3437         | NAU2894         | 21 | CGR5602         | JESPR154        | 5.90  | 3.52 |
|    | 23 | SWU14807        | PGML4185        | 25 | <b>HAU1382</b>  | <b>SWU19848</b> | 5.37  | 3.53 |
|    | 21 | SWU15915        | SWU0189         | 26 | SWU17336        | NAU5072         | 7.67  | 3.95 |
|    | 11 | <b>SWU15972</b> | TMB0628         | 28 | HAU3071         | <b>CGR5534</b>  | 5.12  | 3.08 |
|    | 3  | <b>SWU12732</b> | <b>SWU12783</b> | 28 | <b>CGR5534</b>  | <b>SHIN0219</b> | 5.93  | 3.81 |
|    | 20 | <b>SWU20035</b> | <b>DPL0319</b>  | 28 | <b>CGR5534</b>  | <b>SHIN0219</b> | 5.45  | 3.05 |
|    | 24 | SWU13745        | Gh273           | 28 | <b>CGR5534</b>  | <b>SHIN0219</b> | 6.39  | 3.93 |
|    | 4  | SWU18876        | SWU12672        | 28 | <b>SHIN0219</b> | <b>TMB2386</b>  | 10.11 | 6.68 |
|    | 25 | <b>HAU1382</b>  | <b>SWU19848</b> | 28 | <b>TMB2386</b>  | SWU12343        | 6.33  | 4.00 |

The result detected by software ICIMapping 4.1. E01 and E03, Cangzhou in 2015 and 2016; E02, Handan in 2016. Chi and C analysis. AA is the epistatic effect between loci i and j. AAE is the effect of the environmental interaction of epistasis. AA environment interactions in E1, E2, E3 and E4, respectively. V(AA)% and V(AAE)%, percentage of the total variation explained between E-QTLs and QEs with the M-QTLs and QEs in RIL populations. Markers in bold a

| V(AAE) | AA    | AAE01 | AAE02 | AAE03 |
|--------|-------|-------|-------|-------|
| 0.20   | -0.21 | 0.05  | -0.06 | 0.01  |
| 0.28   | 0.20  | -0.07 | 0.06  | 0.01  |
| 0.09   | -0.21 | 0.02  | 0.02  | -0.04 |
| 0.10   | -0.24 | 0.00  | 0.03  | -0.03 |
| 0.36   | -0.20 | -0.02 | -0.07 | 0.09  |
| 0.19   | 0.21  | -0.05 | 0.05  | 0.00  |
| 0.06   | -0.20 | 0.03  | -0.01 | -0.02 |
| 0.00   | -0.21 | 0.01  | 0.00  | -0.01 |
| 0.00   | 0.21  | -0.02 | 0.01  | 0.01  |
| 0.19   | 0.20  | -0.03 | 0.06  | -0.02 |
| 0.22   | -0.22 | 0.06  | -0.01 | -0.05 |
| 0.07   | -0.22 | -0.01 | -0.03 | 0.04  |
| 0.28   | -0.21 | 0.04  | 0.04  | -0.07 |
| 0.10   | -0.25 | 0.04  | 0.00  | -0.05 |
| 0.29   | -0.21 | 0.07  | -0.07 | 0.00  |
| 0.19   | -0.21 | 0.06  | -0.02 | -0.04 |
| 0.30   | -0.24 | 0.06  | 0.01  | -0.07 |
| 0.38   | -0.21 | 0.08  | 0.02  | -0.09 |
| 0.64   | -0.21 | 0.12  | -0.08 | -0.05 |
| 0.10   | 0.21  | -0.02 | 0.04  | -0.02 |
| 0.03   | -0.22 | 0.03  | -0.02 | 0.00  |
| 0.36   | 0.24  | -0.09 | 0.03  | 0.06  |
| 0.52   | 0.27  | -0.08 | 0.10  | -0.02 |
| 0.11   | 0.21  | -0.02 | -0.03 | 0.05  |
| 0.21   | -0.22 | 0.03  | 0.04  | -0.07 |
| 0.81   | -0.19 | 0.09  | 0.05  | -0.14 |
| 0.13   | 0.21  | -0.06 | 0.02  | 0.04  |
| 0.04   | -0.23 | 0.00  | -0.01 | 0.02  |
| 0.01   | 0.22  | -0.02 | 0.02  | 0.00  |
| 0.29   | -0.20 | 0.07  | 0.00  | -0.07 |
| 0.04   | -0.24 | 0.03  | 0.00  | -0.03 |
| 0.64   | -0.20 | 0.12  | -0.07 | -0.04 |
| 0.14   | 0.23  | -0.03 | -0.01 | 0.04  |
| 0.67   | 0.23  | -0.12 | 0.09  | 0.03  |
| 0.12   | -0.24 | 0.04  | 0.01  | -0.05 |
| 0.24   | 0.20  | -0.07 | 0.05  | 0.03  |
| 0.26   | 0.20  | -0.08 | 0.03  | 0.05  |
| 0.07   | 0.26  | -0.03 | 0.03  | 0.00  |
| 0.10   | 0.22  | -0.03 | -0.01 | 0.04  |
| 0.06   | 0.22  | 0.00  | -0.03 | 0.03  |
| 0.05   | 0.22  | -0.04 | 0.02  | 0.02  |
| 0.28   | -0.24 | 0.02  | -0.07 | 0.05  |
| 0.22   | -0.21 | 0.06  | -0.06 | 0.00  |
| 0.23   | -0.23 | 0.06  | -0.05 | -0.01 |
| 0.38   | 0.20  | -0.07 | -0.01 | 0.08  |
| 0.03   | 0.21  | -0.03 | 0.03  | -0.01 |
| 0.22   | 0.21  | -0.03 | -0.04 | 0.06  |
| 0.30   | 0.22  | -0.04 | -0.05 | 0.09  |
| 0.31   | -0.21 | 0.08  | -0.04 | -0.04 |

|      |       |       |       |       |
|------|-------|-------|-------|-------|
| 0.47 | -0.20 | 0.01  | -0.09 | 0.08  |
| 0.14 | 0.21  | -0.01 | -0.04 | 0.05  |
| 0.02 | 0.21  | 0.00  | -0.02 | 0.02  |
| 0.34 | -0.27 | -0.06 | 0.11  | -0.05 |
| 0.10 | 0.29  | -0.01 | -0.05 | 0.06  |
| 0.08 | -0.29 | 0.02  | -0.05 | 0.03  |
| 0.02 | 0.32  | 0.00  | -0.04 | 0.03  |
| 0.09 | -0.27 | -0.02 | -0.04 | 0.06  |
| 0.69 | -0.25 | -0.12 | 0.16  | -0.04 |
| 0.30 | -0.28 | -0.10 | 0.04  | 0.07  |
| 0.06 | -0.27 | -0.03 | 0.01  | 0.02  |
| 0.26 | -0.28 | 0.04  | 0.06  | -0.09 |
| 0.14 | 0.26  | 0.02  | -0.01 | 0.00  |
| 0.04 | -0.27 | -0.01 | 0.03  | -0.01 |
| 0.48 | -0.26 | 0.03  | 0.10  | -0.13 |
| 0.09 | -0.29 | -0.06 | 0.03  | 0.03  |
| 0.03 | -0.29 | -0.03 | 0.02  | 0.01  |
| 0.00 | -0.27 | -0.01 | 0.01  | 0.00  |
| 0.29 | -0.30 | -0.08 | 0.10  | -0.02 |
| 0.66 | -0.28 | 0.05  | 0.10  | -0.15 |
| 0.05 | 0.27  | -0.03 | -0.02 | 0.05  |
| 0.00 | 0.28  | 0.01  | -0.01 | 0.00  |
| 0.12 | -0.27 | 0.02  | 0.05  | -0.06 |
| 0.02 | 0.29  | -0.02 | 0.01  | 0.01  |
| 0.52 | -0.28 | -0.10 | -0.03 | 0.13  |
| 0.36 | 0.28  | 0.01  | -0.10 | 0.09  |
| 0.08 | 0.28  | -0.01 | 0.05  | -0.04 |
| 0.88 | 0.30  | 0.18  | -0.08 | -0.11 |
| 0.27 | -0.27 | 0.07  | 0.03  | -0.09 |
| 0.29 | 0.28  | 0.06  | -0.10 | 0.04  |
| 0.85 | -0.25 | -0.16 | 0.02  | 0.15  |
| 0.00 | 0.27  | 0.01  | 0.00  | -0.01 |
| 0.07 | -0.30 | -0.07 | 0.05  | 0.02  |
| 0.21 | -0.29 | 0.05  | 0.03  | -0.08 |
| 0.22 | 0.28  | 0.03  | -0.09 | 0.06  |
| 0.42 | -0.25 | -0.12 | 0.04  | 0.08  |
| 0.34 | -0.30 | -0.08 | -0.04 | 0.12  |
| 0.18 | -0.28 | -0.09 | 0.05  | 0.04  |
| 0.10 | -0.29 | -0.04 | 0.06  | -0.02 |
| 0.40 | 0.27  | 0.09  | -0.12 | 0.03  |
| 0.56 | 0.29  | 0.14  | -0.10 | -0.04 |
| 0.02 | -0.27 | 0.00  | 0.01  | -0.01 |
| 0.15 | 0.28  | -0.07 | 0.06  | 0.01  |
| 0.10 | 0.28  | 0.06  | -0.03 | -0.03 |
| 0.33 | -0.25 | -0.06 | 0.11  | -0.05 |
| 0.11 | -0.31 | -0.06 | 0.04  | 0.02  |
| 0.40 | 0.26  | 0.08  | -0.12 | 0.04  |
| 0.33 | 0.02  | 0.00  | 0.00  | 0.00  |
| 0.40 | -0.02 | 0.00  | 0.00  | 0.00  |
| 0.53 | -0.02 | 0.00  | -0.01 | 0.01  |
| 0.40 | 0.02  | 0.01  | 0.00  | 0.00  |

|      |       |       |       |       |
|------|-------|-------|-------|-------|
| 0.13 | -0.02 | 0.00  | 0.00  | 0.00  |
| 0.33 | 0.02  | 0.00  | 0.00  | 0.00  |
| 0.00 | 0.02  | 0.00  | 0.00  | 0.00  |
| 0.33 | 0.02  | 0.00  | 0.00  | 0.00  |
| 0.07 | 0.02  | 0.00  | 0.00  | 0.00  |
| 0.20 | 0.02  | 0.00  | 0.00  | 0.00  |
| 0.20 | -0.02 | 0.00  | -0.01 | 0.00  |
| 0.33 | 0.02  | 0.00  | 0.00  | 0.00  |
| 0.07 | -0.02 | 0.00  | 0.00  | 0.00  |
| 0.13 | -0.02 | 0.00  | 0.00  | 0.00  |
| 0.46 | 0.02  | 0.00  | -0.01 | 0.00  |
| 0.46 | 0.02  | 0.00  | 0.00  | 0.00  |
| 0.00 | -0.02 | 0.00  | 0.00  | 0.00  |
| 0.00 | 0.02  | 0.00  | 0.00  | 0.00  |
| 0.19 | -0.07 | -0.01 | 0.02  | -0.02 |
| 0.06 | -0.08 | 0.01  | -0.01 | 0.00  |
| 0.04 | -0.07 | 0.01  | 0.00  | -0.01 |
| 0.25 | -0.07 | 0.01  | 0.01  | -0.03 |
| 0.09 | 0.07  | -0.02 | 0.01  | 0.01  |
| 0.39 | -0.08 | 0.01  | 0.03  | -0.03 |
| 0.24 | 0.07  | -0.03 | 0.01  | 0.02  |
| 0.29 | 0.07  | -0.02 | -0.01 | 0.03  |
| 0.14 | 0.07  | 0.02  | -0.01 | -0.01 |
| 0.13 | 0.07  | 0.00  | -0.02 | 0.02  |
| 0.25 | -0.08 | 0.02  | -0.03 | 0.01  |
| 0.18 | -0.09 | 0.01  | 0.02  | -0.02 |
| 0.34 | 0.07  | -0.03 | 0.01  | 0.02  |
| 0.01 | -0.07 | 0.01  | -0.01 | 0.00  |
| 0.90 | 0.07  | -0.02 | -0.04 | 0.05  |
| 0.18 | 0.07  | 0.02  | -0.01 | -0.01 |
| 0.78 | 0.07  | 0.02  | -0.05 | 0.03  |
| 0.07 | -0.08 | 0.01  | -0.01 | 0.00  |
| 0.00 | -0.08 | 0.00  | 0.00  | 0.00  |
| 0.31 | 0.07  | -0.02 | -0.02 | 0.03  |
| 0.17 | 0.07  | 0.01  | -0.02 | 0.00  |
| 0.67 | -0.08 | 0.04  | 0.00  | -0.04 |
| 0.03 | 0.07  | 0.00  | -0.01 | 0.01  |
| 0.08 | 0.07  | -0.02 | 0.00  | 0.01  |
| 0.47 | 0.07  | -0.03 | 0.00  | 0.03  |
| 0.04 | -0.08 | 0.01  | -0.01 | 0.00  |
| 0.05 | 0.10  | -0.01 | 0.01  | 0.01  |
| 0.16 | 0.08  | 0.01  | 0.01  | -0.02 |

Chj represent the linkage group number of the loci being tested in the EI, AAE2, AAE3 and AAE4 indicate the epistatic effects of QTL  $\times$  explained by the AA and AAE. **Bold figures indicate the same QTLs re those flanking M-QTLs identified.**

Table S5 Common single locus QTLs in comparison with the previous studies in multiple years and locations

| No. | QTL                      | Env.          | Flanking markers |                 | BC           |              |              | RIL         |              |              | Reference            |
|-----|--------------------------|---------------|------------------|-----------------|--------------|--------------|--------------|-------------|--------------|--------------|----------------------|
|     |                          |               |                  |                 | LOD          | Effect value | Var%         | LOD         | Effect value | Var%         |                      |
| 1   | <i>qFL-Chr2-1</i>        | 2016E1        | SWU12393         | SWU11013        |              |              |              | 4.24        | 0.31         | 8.25         | In the present study |
|     | <i>qFL-Chr2-1</i>        | 2012E2        | <u>SWU12393</u>  | <u>SWU11013</u> | <u>5.72</u>  | <u>0.40</u>  | <u>11.06</u> |             |              |              | Shang et al., 2016d  |
|     | <i>qFL-Chr2-2</i>        | 2012E2        | <u>SWU12025</u>  | <u>SWU11889</u> |              |              |              | <u>2.38</u> | <u>0.24</u>  | <u>6.92</u>  | Shang et al., 2016d  |
| 2   | <i>qFL-Chr5-1</i>        | 2015E2        | NAU4034          | SWU17713        | 3.80         | 0.19         | 7.70         |             |              |              | In the present study |
|     | <b><i>qFL-chr5-3</i></b> | <u>2015E1</u> | <u>Gh388</u>     | <u>SWU17713</u> | <u>10.22</u> | <u>0.47</u>  | <u>19.63</u> |             |              |              | Ma et al.,2017       |
|     |                          | <u>2015E2</u> | <u>Gh388</u>     | <u>SWU17713</u> | <u>5.39</u>  | <u>0.36</u>  | <u>10.65</u> |             |              |              | Ma et al.,2017       |
|     |                          | <u>2015E2</u> | <u>SWU17713</u>  | <u>HAU1603</u>  |              |              |              | <u>5.62</u> | <u>0.25</u>  | <u>11.52</u> | Ma et al.,2017       |
|     | <i>qFL-Chr5-4</i>        | 2012E1        | <u>NAU4034</u>   | <u>SWU17713</u> |              |              |              | <u>4.30</u> | <u>0.19</u>  | <u>8.57</u>  | Shang et al., 2016d  |
|     |                          | 2012E1        | <u>NAU4034</u>   | <u>SWU17713</u> | <u>8.94</u>  | <u>0.37</u>  | <u>16.39</u> |             |              |              | Shang et al., 2016d  |
|     |                          | 2012E1        | NAU4034          | SWU17713        | 6.39         | 0.34         | 11.68        |             |              |              | Shang et al., 2016d  |
|     |                          | 2012E2        | NAU4034          | SWU17713        | 2.90         | 0.29         | 5.64         |             |              |              | Shang et al., 2016d  |
| 3   | <b><i>qFL-Chr5-2</i></b> | 2016E1        | HAU1603          | PGML4457        | 3.55         | 0.22         | 7.46         |             |              |              | In the present study |
|     |                          | 2015E2        | PGML4457         | MUSS193         | 3.44         | 0.19         | 7.82         |             |              |              | In the present study |
|     | <b><i>qFL-chr5-4</i></b> | <u>2015E3</u> | <u>MUSS193</u>   | <u>PGML4350</u> | <u>4.44</u>  | <u>0.32</u>  | <u>8.55</u>  |             |              |              | Ma et al.,2017       |

| No. | QTL                | Env.          | Flanking markers |                 | BC          |              |              | RIL         |              |              | Reference            |
|-----|--------------------|---------------|------------------|-----------------|-------------|--------------|--------------|-------------|--------------|--------------|----------------------|
|     |                    |               |                  |                 | LOD         | Effect value | Var%         | LOD         | Effect value | Var%         |                      |
|     |                    | <u>2015E2</u> | <u>PGML4350</u>  | <u>SWU17781</u> |             |              |              | <u>3.89</u> | <u>0.22</u>  | <u>8.99</u>  | Ma et al.,2017       |
|     | <i>qFL-Chr5-5</i>  | 2012E4        | <u>PGML4457</u>  | <u>MUSS193</u>  |             |              |              | <u>3.15</u> | <u>0.15</u>  | <u>6.24</u>  | Shang et al., 2016d  |
|     |                    | 2012E4        | <u>PGML4457</u>  | <u>MUSS193</u>  | <u>4.18</u> | <u>0.25</u>  | <u>7.92</u>  |             |              |              | Shang et al., 2016d  |
|     |                    | 2012E4        | PGML4457         | MUSS193         | 4.40        | 0.27         | 8.97         |             |              |              | Shang et al., 2016d  |
| 4   | <i>qFL-Chr5-3</i>  | 2016E1        | CGR5025          | NBRI0694        | 5.57        | 0.26         | 10.49        |             |              |              | In the present study |
|     | <i>qFL-chr5-5</i>  | <u>2015E3</u> | <u>NBRI0694</u>  | <u>DPL0022</u>  | <u>3.66</u> | <u>0.29</u>  | <u>7.13</u>  |             |              |              | Ma et al.,2017       |
|     | <i>qFL-Chr5-6</i>  | 2012E4        | <u>CGR5025</u>   | <u>NBRI0694</u> |             |              |              | <u>4.72</u> | <u>0.18</u>  | <u>9.11</u>  | Shang et al., 2016d  |
|     |                    | 2012E4        | <u>CGR5025</u>   | <u>NBRI0694</u> | <u>9.13</u> | <u>0.35</u>  | <u>15.75</u> |             |              |              | Shang et al., 2016d  |
|     |                    | 2012E4        | NBRI0694         | DPL0022         | 4.83        | 0.27         | 9.47         |             |              |              | Shang et al., 2016d  |
| 5   | <i>qFL-Chr9-1</i>  | 2016E1        | SWU15511         | SWU15413        |             |              |              | 3.53        | -0.28        | 6.78         | In the present study |
|     | <i>qFL-Chr9-1</i>  | 2012E4        | <u>SWU15517</u>  | <u>SWU15511</u> | <u>2.02</u> | <u>-0.15</u> | <u>3.00</u>  |             |              |              | Shang et al., 2016d  |
|     |                    | 2012E1        | <u>SWU15511</u>  | <u>SWU15413</u> | <u>2.70</u> | <u>-0.19</u> | <u>4.50</u>  |             |              |              | Shang et al., 2016d  |
| 6   | <i>qFL-Chr10-2</i> | <u>2016E2</u> | <u>HAU0635</u>   | <u>NAU2139</u>  |             |              |              | <u>4.76</u> | <u>-0.52</u> | <u>17.90</u> | In the present study |
|     | <i>qFL-Chr10-3</i> | 2012E2        | SWU20260         | Gh144           | 3.89        | -0.33        | 7.64         |             |              |              | Shang et al., 2016d  |
|     |                    | 2012E1        | Gh320            | HAU0635         | 2.46        | -0.22        | 5.31         |             |              |              | Shang et al., 2016d  |

| No.               | QTL                | Env.               | Flanking markers |                 | BC             |              |              | RIL          |              |                     | Reference            |
|-------------------|--------------------|--------------------|------------------|-----------------|----------------|--------------|--------------|--------------|--------------|---------------------|----------------------|
|                   |                    |                    |                  |                 | LOD            | Effect value | Var%         | LOD          | Effect value | Var%                |                      |
| 7                 | <i>qFS-Chr21-1</i> | 2012E1             | <u>Gh320</u>     | <u>HAU0635</u>  | <u>5.45</u>    | <u>-0.33</u> | <u>13.47</u> |              |              |                     | Shang et al., 2016d  |
|                   |                    | <u>2016E2</u>      | <u>SWU0189</u>   | <u>DPL0050a</u> |                |              |              | <u>3.40</u>  | <u>-0.41</u> | <u>8.42</u>         | In the present study |
|                   |                    | <u>2015E2</u>      | <u>SWU15915</u>  | <u>SWU0189</u>  | <u>3.28</u>    | <u>-0.37</u> | <u>6.35</u>  |              |              |                     | Ma et al.,2017       |
|                   |                    | 2012E2             | <u>SWU0189</u>   | <u>DPL0050a</u> |                |              |              | <u>2.16</u>  | <u>-0.21</u> | <u>4.72</u>         | Shang et al., 2016d  |
|                   |                    | 2012E2             | <u>SWU0189</u>   | <u>DPL0050a</u> | <u>6.65</u>    | <u>-0.53</u> | <u>15.51</u> |              |              |                     | Shang et al., 2016d  |
|                   |                    | 2012E1             | <u>BNL3171</u>   | <u>CGR5808</u>  |                |              |              | <u>2.89</u>  | <u>-0.24</u> | <u>5.80</u>         | Shang et al., 2016d  |
|                   |                    | 2012E1             | <u>BNL3171</u>   | <u>CGR5808</u>  | <u>3.98</u>    | <u>-0.36</u> | <u>7.10</u>  |              |              |                     | Shang et al., 2016d  |
| 8                 | <i>qFS-Chr21-2</i> | 2016E2             | BNL3171          | CGR5808         |                |              |              | 2.89         | -0.35        | 6.27                | In the present study |
|                   |                    | <u>2016E2</u>      | <u>BNL3171</u>   | <u>CGR5808</u>  | <u>2.97</u>    | <u>-0.29</u> | <u>6.90</u>  |              |              |                     | In the present study |
|                   |                    | <u>2016E2</u>      | <u>CGR5808</u>   | <u>HAU0423</u>  |                |              |              | <u>4.24</u>  | <u>-0.44</u> | <u>9.62</u>         | In the present study |
|                   |                    | 2016E1             | CGR5808          | HAU0423         |                |              |              | 5.31         | -0.46        | 13.37               | In the present study |
|                   |                    | 2016E2             | CGR5808          | HAU0423         |                |              |              | 2.85         | -0.42        | 8.92                | In the present study |
|                   |                    | 2016E2             | HAU0423          | CGR5806         | 5.18           | -0.34        | 10.14        |              |              |                     | In the present study |
|                   |                    | <i>qFS-Chr21-4</i> | 2012E2           | <u>BNL3171</u>  | <u>CGR5808</u> | <u>4.52</u>  | <u>-0.43</u> | <u>10.60</u> |              |                     |                      |
| <i>qFM-Chr4-3</i> | 2012E1             | <u>SWU16783</u>    | <u>NAU3868</u>   | <u>2.57</u>     | <u>0.11</u>    | <u>9.84</u>  |              |              |              | Shang et al., 2016d |                      |



| No. | QTL                | Env.               | Flanking markers |                 | BC              |              |              | RIL         |              |              | Reference            |                     |
|-----|--------------------|--------------------|------------------|-----------------|-----------------|--------------|--------------|-------------|--------------|--------------|----------------------|---------------------|
|     |                    |                    |                  |                 | LOD             | Effect value | Var%         | LOD         | Effect value | Var%         |                      |                     |
| 9   | <i>qFM-Chr15-1</i> | 2012E4             | NAU3868          | SWU21617        | 2.13            | 0.07         | 3.76         |             |              |              | Shang et al., 2016d  |                     |
|     |                    | <u>2016E2</u>      | <u>DC40175</u>   | <u>SWU11630</u> | <u>2.57</u>     | <u>0.06</u>  | <u>5.46</u>  |             |              |              | In the present study |                     |
|     |                    | 2016E1             | DC40175          | SWU11630        |                 |              |              | 6.04        | 0.15         | 12.36        | In the present study |                     |
|     |                    | <i>qFM-Chr15-1</i> | 2012E4           | <u>DC40175</u>  | <u>SWU11630</u> |              |              |             | <u>6.40</u>  | <u>0.07</u>  | <u>12.70</u>         | Shang et al., 2016d |
|     |                    |                    | 2012E4           | <u>DC40175</u>  | <u>SWU11630</u> | <u>5.28</u>  | <u>0.10</u>  | <u>9.85</u> |              |              |                      | Shang et al., 2016d |
| 10  | <i>qFU-Chr22-1</i> | 2012E4             | DC40175          | SWU11630        | 2.80            | 0.08         | 5.26         |             |              |              | Shang et al., 2016d  |                     |
|     |                    | 2015E2             | SWU21635         | SWU21646        | 4.24            | 0.22         | 8.86         |             |              |              | In the present study |                     |
|     |                    | <i>qFM-Chr22-1</i> | 2012E2           | <u>SWU21586</u> | <u>PGML1712</u> |              |              |             | <u>3.04</u>  | <u>0.06</u>  | <u>6.42</u>          | Shang et al., 2016d |
| 11  | <i>qFU-Chr2-1</i>  | 2016E1             | SWU12025         | SWU11889        | 3.91            | -0.28        | 11.30        |             |              |              | In the present study |                     |
|     |                    | <i>qFU-Chr2-1</i>  | 2012E4           | <u>SWU12025</u> | <u>SWU11889</u> | <u>3.54</u>  | <u>-0.23</u> | <u>9.97</u> |              |              |                      | Shang et al., 2016d |
| 12  | <i>qFE-Chr2-1</i>  | 2016E1             | PGML0700         | SWU12016        | 3.62            | 0.02         | 6.90         |             |              |              | In the present study |                     |
|     |                    | <i>qFE-Chr2-3</i>  | 2012E4           | <u>PGML0700</u> | <u>SWU12016</u> |              |              |             | <u>4.43</u>  | <u>0.04</u>  | <u>17.31</u>         | Ma et al.,2017      |
|     |                    | <i>qFL-chr10-1</i> | <u>2015E1</u>    | <u>SWU20260</u> | <u>Gh144</u>    | <u>3.15</u>  | <u>-0.25</u> | <u>5.61</u> |              |              |                      | Ma et al.,2017      |
| 13  | <i>qFL-Chr19-1</i> | 2015E2             | SWU14431b        | SWU17782        | 3.88            | 0.30         | 17.98        |             |              |              | In the present study |                     |
|     |                    | <u>2016E2</u>      | <u>SWU17782</u>  | <u>DPL0056</u>  |                 |              |              | <u>5.28</u> | <u>0.41</u>  | <u>11.05</u> | In the present study |                     |

| No. | QTL                       | Env.          | Flanking markers | BC               |              |      | RIL   |              |             | Reference            |                |
|-----|---------------------------|---------------|------------------|------------------|--------------|------|-------|--------------|-------------|----------------------|----------------|
|     |                           |               |                  | LOD              | Effect value | Var% | LOD   | Effect value | Var%        |                      |                |
|     |                           | 2015E2        | SWU17782         | DPL0056          | 3.16         | 0.24 | 11.35 |              |             | In the present study |                |
|     | <i>qFL-<b>chr19-1</b></i> | <u>2015E2</u> | <u>PGML4342</u>  | <u>SWU14431b</u> |              |      |       | <u>2.76</u>  | <u>0.25</u> | <u>11.16</u>         | Ma et al.,2017 |

**Table S6 Phenotype values of fiber quality traits of BC/M population in three field trials in this study**

| Number of field trial plot | Material | FL/mm  | FU/%   | FS(cN/tex ) | FE/%   | FM     | FL/mm  | FU/%   |
|----------------------------|----------|--------|--------|-------------|--------|--------|--------|--------|
|                            |          | 2015E2 | 2015E2 | 2015E2      | 2015E2 | 2015E2 | 2016E1 | 2016E1 |
| 001                        | 14QM003  | 28.9   | 85.5   | 30.2        | 6.9    | 5.0    | 29.6   | 87.3   |
| 002                        | 14QM003H | 29.6   | 87.3   | 28.9        | 6.9    | 5.0    | 30.3   | 88.2   |
| 003                        | P♂       | 28.1   | 86.5   | 29.3        | 6.8    | 4.1    | 29.5   | 88.0   |
| 004                        | 14QM004H | 29.6   | 85.5   | 30.5        | 7.0    | 4.6    | 29.8   | 87.9   |
| 005                        | 14QM004  | 29.0   | 84.1   | 30.1        | 7.0    | 5.0    | 30.4   | 87.6   |
| 006                        | 14QM005  | 29.3   | 86.3   | 29.8        | 6.9    | 5.2    | 32.3   | 86.0   |
| 007                        | 14QM005H | 28.6   | 84.3   | 29.8        | 6.8    | 4.6    | 30.3   | 86.1   |
| 008                        | P♂       | 29.7   | 86.0   | 29.9        | 6.9    | 4.9    | 29.5   | 88.0   |
| 009                        | 14QM006H | 31.1   | 86.3   | 31.1        | 6.9    | 4.6    | 31.1   | 86.8   |
| 010                        | 14QM006  | 30.6   | 86.1   | 31.4        | 7.0    | 5.3    | 30.7   | 86.9   |
| 011                        | 14QM007  | 29.5   | 86.2   | 29.2        | 6.9    | 5.0    | 29.8   | 86.3   |
| 012                        | 14QM007H | 30.7   | 85.2   | 31.1        | 7.0    | 5.2    | 31.6   | 88.5   |
| 013                        | P♂       | 29.6   | 85.1   | 30.0        | 6.9    | 4.4    | 29.5   | 88.0   |
| 014                        | 14QM008H | 30.9   | 84.7   | 30.7        | 7.0    | 4.5    | 30.8   | 87.6   |
| 015                        | 14QM008  | 29.9   | 85.2   | 28.9        | 6.9    | 4.6    | 31.3   | 86.7   |
| 016                        | 14QM009  | 28.1   | 85.4   | 28.4        | 6.8    | 4.1    | 29.9   | 86.0   |
| 017                        | 14QM009H | 28.7   | 85.4   | 29.0        | 6.8    | 4.8    | 29.0   | 86.7   |
| 018                        | P♂       | 27.8   | 84.7   | 27.6        | 6.9    | 5.0    | 29.5   | 88.0   |
| 019                        | 14QM010H | 30.4   | 86.6   | 30.7        | 7.0    | 4.7    | 30.8   | 87.8   |
| 020                        | 14QM010  | 31.4   | 85.6   | 32.3        | 7.0    | 4.3    | 32.1   | 86.1   |
| 021                        | 14QM011  | 31.5   | 86.0   | 31.9        | 7.0    | 4.9    | 28.9   | 86.4   |
| 022                        | 14QM011H | 31.2   | 87.5   | 31.2        | 7.0    | 5.1    | 32.1   | 87.5   |
| 023                        | P♂       | 30.4   | 87.0   | 30.2        | 6.9    | 4.3    | 29.5   | 88.0   |
| 024                        | 14QM012H | 30.7   | 87.3   | 31.8        | 7.0    | 5.1    | 30.9   | 85.4   |
| 025                        | 14QM012  | 31.6   | 84.9   | 35.6        | 7.0    | 4.3    | 28.8   | 84.3   |
| 026                        | 14QM013  | 29.6   | 85.2   | 30.3        | 7.1    | 4.9    | 28.7   | 85.9   |
| 027                        | 14QM013H | 30.3   | 84.9   | 30.4        | 7.0    | 4.5    | 29.0   | 86.1   |
| 028                        | P♂       | 29.9   | 86.0   | 29.2        | 6.9    | 4.4    | 29.5   | 88.0   |
| 029                        | 14QM014H | 32.5   | 86.6   | 31.3        | 7.0    | 4.9    | 30.6   | 87.0   |
| 030                        | 14QM014  | 29.6   | 83.4   | 29.4        | 6.8    | 3.9    | 29.9   | 85.1   |
| 031                        | 14QM015  | 30.3   | 85.5   | 29.6        | 7.0    | 4.8    | 30.0   | 85.6   |
| 032                        | 14QM015H | 29.2   | 86.1   | 28.3        | 6.8    | 4.6    | 30.5   | 86.9   |
| 033                        | P♂       | 28.6   | 85.7   | 31.0        | 6.8    | 3.9    | 29.5   | 88.0   |
| 034                        | 14QM016H | 30.4   | 85.7   | 30.0        | 6.9    | 5.1    | 29.9   | 87.8   |
| 035                        | 14QM016  | 31.1   | 86.0   | 32.8        | 7.0    | 4.7    | 31.8   | 87.4   |
| 036                        | 14QM017  | 30.5   | 86.1   | 32.6        | 7.0    | 4.2    | 30.7   | 86.5   |
| 037                        | 14QM017H | 30.3   | 84.8   | 30.8        | 7.2    | 5.0    | 31.1   | 87.5   |
| 038                        | P♂       | 29.7   | 85.6   | 29.7        | 6.9    | 4.4    | 29.5   | 88.0   |
| 039                        | 14QM018H | 29.9   | 84.3   | 30.8        | 6.9    | 4.6    | 30.5   | 86.0   |
| 040                        | 14QM018  | 32.0   | 86.7   | 34.1        | 7.0    | 4.0    | 29.9   | 84.9   |
| 041                        | 14QM019  | 30.7   | 86.2   | 32.4        | 7.0    | 4.7    | 28.8   | 84.1   |
| 042                        | 14QM019H | 29.7   | 85.3   | 29.1        | 6.8    | 4.8    | 30.2   | 86.6   |
| 043                        | P♂       | 29.6   | 84.5   | 27.9        | 7.0    | 4.9    | 29.5   | 88.0   |
| 044                        | 14QM020H | 30.4   | 86.0   | 30.7        | 7.0    | 4.5    | 30.5   | 86.9   |
| 045                        | 14QM020  | 30.9   | 82.9   | 29.6        | 6.9    | 4.3    | 32.3   | 86.2   |
| 046                        | 14QM021  | 30.3   | 85.2   | 31.2        | 6.9    | 4.7    | 30.9   | 85.1   |

|     |          |      |      |      |     |     |      |      |
|-----|----------|------|------|------|-----|-----|------|------|
| 047 | 14QM021H | 31.0 | 85.8 | 30.8 | 7.0 | 4.7 | 29.9 | 87.3 |
| 048 | P♂       | 29.6 | 84.8 | 28.1 | 6.9 | 4.7 | 29.5 | 88.0 |
| 049 | 14QM022H | 30.7 | 86.4 | 32.1 | 7.1 | 4.7 | 30.7 | 87.2 |
| 050 | 14QM022  | 30.1 | 84.4 | 30.4 | 7.1 | 4.7 | 30.3 | 86.3 |
| 051 | 14QM023  | 31.9 | 85.2 | 30.5 | 7.0 | 4.5 | 29.9 | 86.0 |
| 052 | 14QM023H | 30.8 | 84.8 | 29.1 | 7.0 | 4.8 | 30.0 | 86.7 |
| 053 | 14QM380  | 30.9 | 86.5 | 29.7 | 7.0 | 4.7 | 28.9 | 86.4 |
| 054 | 14QM024H | 32.2 | 86.5 | 32.5 | 7.3 | 4.5 | 31.4 | 86.1 |
| 055 | 14QM024  | 33.1 | 86.7 | 33.0 | 7.3 | 4.4 | 30.4 | 86.7 |
| 056 | 14QM025  | -    | -    | -    | -   | -   | 30.7 | 85.9 |
| 057 | 14QM025H | 31.6 | 87.2 | 31.9 | 7.1 | 4.9 | 29.5 | 87.8 |
| 058 | P♂       | 29.8 | 85.5 | 29.0 | 6.9 | 4.5 | 28.9 | 86.4 |
| 059 | 14QM026H | 30.2 | 87.0 | 30.0 | 7.0 | 5.0 | 30.1 | 86.9 |
| 060 | 14QM026  | 29.6 | 86.2 | 28.1 | 7.1 | 4.9 | 30.3 | 87.3 |
| 061 | 14QM027  | 30.6 | 85.8 | 28.5 | 7.0 | 4.9 | 29.1 | 87.0 |
| 062 | 14QM027H | 30.8 | 87.4 | 29.3 | 7.0 | 5.1 | 29.9 | 88.2 |
| 063 | P♂       | 32.1 | 85.9 | 31.7 | 7.1 | 4.8 | 28.9 | 86.4 |
| 064 | 14QM028H | 30.3 | 85.9 | 29.7 | 6.9 | 4.6 | 31.0 | 86.8 |
| 065 | 14QM028  | 29.8 | 84.9 | 29.6 | 7.0 | 5.0 | 29.7 | 86.1 |
| 066 | 14QM029  | 32.1 | 86.7 | 29.9 | 7.1 | 4.9 | 31.6 | 87.3 |
| 067 | 14QM029H | 31.1 | 87.2 | 30.6 | 7.0 | 4.8 | 30.4 | 84.1 |
| 068 | P♂       | 30.0 | 87.3 | 29.9 | 6.9 | 4.7 | 28.9 | 86.4 |
| 069 | 14QM030H | 32.1 | 84.8 | 32.7 | 7.0 | 4.2 | 31.3 | 86.8 |
| 070 | 14QM030  | 32.6 | 86.2 | 33.8 | 7.2 | 4.1 | 31.7 | 86.8 |
| 071 | 14QM031  | 32.0 | 87.0 | 31.9 | 7.1 | 4.0 | 31.4 | 84.4 |
| 072 | 14QM031H | 32.0 | 85.8 | 31.4 | 7.0 | 4.5 | 32.0 | 84.8 |
| 073 | P♂       | 31.5 | 86.4 | 31.2 | 7.1 | 4.4 | 28.9 | 86.4 |
| 074 | 14QM032H | 32.1 | 86.4 | 31.7 | 7.0 | 5.2 | 30.6 | 86.3 |
| 075 | 14QM032  | 30.6 | 84.0 | 31.9 | 7.1 | 5.1 | 30.2 | 87.5 |
| 076 | 14QM033  | 29.9 | 86.0 | 31.1 | 6.9 | 4.9 | 30.3 | 86.5 |
| 077 | 14QM033H | 31.3 | 85.7 | 31.3 | 7.1 | 5.3 | 30.7 | 87.0 |
| 078 | P♂       | 30.3 | 87.2 | 29.8 | 6.9 | 4.8 | 28.9 | 86.4 |
| 079 | 14QM034H | 30.4 | 85.6 | 31.0 | 7.0 | 5.0 | 30.6 | 87.8 |
| 080 | 14QM034  | 31.4 | 86.0 | 30.7 | 7.1 | 4.6 | 30.8 | 87.1 |
| 081 | 14QM035  | 32.5 | 86.6 | 33.8 | 7.0 | 4.4 | 30.2 | 86.1 |
| 082 | 14QM035H | 30.5 | 85.1 | 30.7 | 7.0 | 4.8 | 30.6 | 87.0 |
| 083 | P♂       | 30.6 | 86.6 | 29.1 | 6.9 | 4.8 | 28.9 | 86.4 |
| 084 | 14QM036H | 31.4 | 85.4 | 30.4 | 7.0 | 4.6 | 31.0 | 86.6 |
| 085 | 14QM036  | 31.4 | 84.9 | 30.8 | 6.9 | 4.1 | 31.1 | 85.8 |
| 086 | 14QM037  | 29.8 | 84.8 | 30.2 | 6.9 | 5.3 | 30.7 | 87.5 |
| 087 | 14QM037H | 31.2 | 86.7 | 32.1 | 7.0 | 4.5 | 30.7 | 85.7 |
| 088 | P♂       | 29.5 | 85.2 | 30.6 | 6.9 | 4.8 | 28.9 | 86.4 |
| 089 | 14QM038H | 30.1 | 86.9 | 27.3 | 6.9 | 4.8 | 29.6 | 86.7 |
| 090 | 14QM038  | 31.4 | 86.1 | 30.5 | 7.0 | 4.7 | 29.2 | 86.5 |
| 091 | 14QM039  | 30.3 | 86.7 | 30.0 | 7.0 | 5.5 | 29.7 | 85.8 |
| 092 | 14QM039H | 31.0 | 86.5 | 30.8 | 7.0 | 5.3 | 30.4 | 88.1 |
| 093 | P♂       | 29.9 | 87.1 | 28.8 | 6.9 | 5.1 | 28.9 | 86.4 |
| 094 | 14QM040H | 30.9 | 86.9 | 30.0 | 7.0 | 4.8 | 30.1 | 86.0 |
| 095 | 14QM040  | 30.5 | 87.2 | 31.0 | 7.0 | 4.8 | 30.0 | 86.9 |
| 096 | 14QM041  | 32.5 | 87.3 | 32.0 | 7.2 | 4.8 | 31.8 | 86.7 |

|     |          |      |      |      |     |     |      |      |
|-----|----------|------|------|------|-----|-----|------|------|
| 097 | 14QM041H | 31.6 | 86.1 | 32.0 | 7.1 | 4.3 | 30.5 | 86.1 |
| 098 | P♂       | 30.6 | 84.3 | 29.1 | 6.9 | 4.5 | 28.9 | 86.4 |
| 099 | 14QM042H | 30.9 | 85.8 | 30.6 | 7.1 | 5.3 | 29.9 | 88.2 |
| 100 | 14QM042  | 31.2 | 87.0 | 30.2 | 7.1 | 5.1 | 30.2 | 87.3 |
| 101 | 14QM043  | 30.2 | 84.7 | 29.8 | 7.0 | 5.2 | 29.8 | 87.2 |
| 102 | 14QM043H | 32.2 | 87.2 | 30.8 | 7.1 | 5.2 | 30.6 | 87.6 |
| 103 | 14QM380  | 29.5 | 86.4 | 29.1 | 6.9 | 5.0 | 28.1 | 83.1 |
| 104 | 14QM044H | 30.7 | 86.6 | 29.9 | 7.1 | 5.2 | 29.6 | 86.4 |
| 105 | 14QM044  | 30.8 | 84.8 | 29.4 | 7.0 | 5.0 | 31.1 | 87.7 |
| 106 | 14QM045  | 32.4 | 87.1 | 31.6 | 7.1 | 4.7 | 30.7 | 87.3 |
| 107 | 14QM045H | 31.9 | 85.9 | 29.0 | 7.0 | 5.0 | 31.5 | 87.1 |
| 108 | P♂       | 30.9 | 86.1 | 30.2 | 7.0 | 4.4 | 28.1 | 83.1 |
| 109 | 14QM046H | 29.7 | 86.2 | 29.2 | 7.0 | 4.7 | 29.9 | 88.0 |
| 110 | 14QM046  | 29.3 | 84.4 | 28.6 | 6.9 | 4.9 | 29.0 | 87.1 |
| 111 | 14QM047  | 31.5 | 85.4 | 30.7 | 7.0 | 5.1 | 30.9 | 86.1 |
| 112 | 14QM047H | 32.2 | 86.3 | 31.6 | 7.0 | 5.1 | 30.3 | 87.1 |
| 113 | P♂       | 30.5 | 86.6 | 30.4 | 7.0 | 5.0 | 28.1 | 83.1 |
| 114 | 14QM048H | 31.2 | 84.3 | 31.1 | 7.0 | 4.4 | 30.0 | 87.9 |
| 115 | 14QM048  | 30.3 | 85.4 | 30.6 | 7.0 | 4.7 | 29.3 | 84.5 |
| 116 | 14QM049  | 31.1 | 85.1 | 30.6 | 7.1 | 4.1 | 29.5 | 87.5 |
| 117 | 14QM049H | 32.0 | 85.4 | 30.5 | 7.1 | 4.6 | 30.7 | 86.8 |
| 118 | P♂       | 31.1 | 85.8 | 31.6 | 7.0 | 5.1 | 28.1 | 83.1 |
| 119 | 14QM050H | 29.8 | 86.1 | 28.9 | 6.9 | 4.7 | 31.9 | 86.9 |
| 120 | 14QM050  | 32.0 | 86.1 | 31.2 | 7.0 | 4.6 | 31.2 | 86.3 |
| 121 | 14QM051  | 31.7 | 86.5 | 33.2 | 7.0 | 4.6 | 31.2 | 88.3 |
| 122 | 14QM051H | 31.6 | 86.2 | 30.9 | 6.9 | 4.4 | 30.2 | 87.5 |
| 123 | P♂       | 28.7 | 85.8 | 28.6 | 6.9 | 4.7 | 28.1 | 83.1 |
| 124 | 14QM052H | 30.7 | 85.1 | 30.1 | 7.0 | 4.7 | 30.3 | 87.5 |
| 125 | 14QM052  | -    | -    | -    | -   | -   | 29.9 | 86.6 |
| 126 | 14QM053  | 33.0 | 85.7 | 34.3 | 7.1 | 3.6 | 30.9 | 86.4 |
| 127 | 14QM053H | 31.1 | 85.3 | 31.9 | 7.2 | 4.4 | 31.9 | 87.0 |
| 128 | P♂       | 29.4 | 86.5 | 28.9 | 6.9 | 5.0 | 28.1 | 83.1 |
| 129 | 14QM054H | 29.9 | 85.7 | 29.9 | 6.9 | 4.8 | 28.6 | 84.8 |
| 130 | 14QM054  | 30.3 | 86.0 | 28.8 | 7.0 | 4.8 | 29.4 | 86.9 |
| 131 | 14QM055  | 29.9 | 85.4 | 31.4 | 6.9 | 5.4 | 30.0 | 88.1 |
| 132 | 14QM055H | 31.2 | 85.5 | 30.9 | 6.9 | 4.7 | 28.9 | 85.8 |
| 133 | P♂       | 30.4 | 83.8 | 29.7 | 6.9 | 4.3 | 28.1 | 83.1 |
| 134 | 14QM056H | 31.4 | 85.4 | 33.1 | 7.0 | 4.4 | 32.0 | 86.4 |
| 135 | 14QM056  | 29.9 | 82.7 | 33.6 | 6.9 | 3.4 | 32.1 | 85.7 |
| 136 | 14QM057  | 29.6 | 84.1 | 30.2 | 6.9 | 3.9 | 29.3 | 85.8 |
| 137 | 14QM057H | 30.8 | 83.7 | 31.2 | 7.0 | 4.5 | 28.0 | 85.4 |
| 138 | P♂       | 29.4 | 82.9 | 30.6 | 7.0 | 5.0 | 28.1 | 83.1 |
| 139 | 14QM058H | 28.9 | 84.6 | 30.7 | 6.9 | 4.8 | 30.2 | 85.5 |
| 140 | 14QM058  | 31.3 | 83.5 | 32.6 | 7.0 | 4.6 | 31.2 | 85.6 |
| 141 | 14QM059  | 28.2 | 85.0 | 28.3 | 6.8 | 4.6 | 31.0 | 86.3 |
| 142 | 14QM059H | 30.4 | 85.3 | 29.8 | 7.0 | 4.9 | 30.0 | 88.4 |
| 143 | P♂       | 30.8 | 86.5 | 29.4 | 6.9 | 4.7 | 28.1 | 83.1 |
| 144 | 14QM060H | 31.1 | 86.4 | 30.4 | 7.0 | 4.6 | 30.3 | 87.7 |
| 145 | 14QM060  | 33.3 | 85.5 | 33.9 | 7.1 | 4.3 | 31.6 | 86.4 |
| 146 | 14QM061  | 29.5 | 86.4 | 30.0 | 6.9 | 5.3 | 29.1 | 85.3 |

|     |          |      |      |      |     |     |      |      |
|-----|----------|------|------|------|-----|-----|------|------|
| 147 | 14QM061H | 30.1 | 84.7 | 29.2 | 6.8 | 5.1 | 28.8 | 86.3 |
| 148 | P♂       | 31.1 | 85.5 | 29.9 | 7.0 | 4.5 | 28.1 | 83.1 |
| 149 | 14QM062H | 31.7 | 86.7 | 29.9 | 7.0 | 4.6 | 30.6 | 88.5 |
| 150 | 14QM062  | 32.3 | 85.7 | 33.4 | 7.0 | 4.2 | 32.5 | 86.4 |
| 151 | 14QM063  | 31.2 | 86.4 | 31.4 | 7.0 | 5.0 | 29.1 | 86.1 |
| 152 | 14QM063H | 31.1 | 86.1 | 32.8 | 7.0 | 4.6 | 30.9 | 87.5 |
| 153 | 14QM380  | 30.7 | 85.7 | 30.2 | 7.0 | 4.6 | 30.1 | 87.5 |
| 154 | 14QM064H | 30.8 | 85.2 | 30.7 | 7.0 | 5.3 | 29.5 | 87.8 |
| 155 | 14QM064  | 32.3 | 85.6 | 32.2 | 7.1 | 5.1 | 29.9 | 86.4 |
| 156 | 14QM065  | 30.5 | 85.9 | 29.9 | 6.9 | 4.9 | 30.9 | 87.6 |
| 157 | 14QM065H | 30.9 | 85.7 | 32.0 | 7.0 | 4.7 | 30.6 | 87.6 |
| 158 | P♂       | 30.8 | 86.6 | 30.1 | 7.0 | 4.6 | 30.1 | 87.5 |
| 159 | 14QM066H | 31.4 | 87.4 | 29.2 | 7.0 | 5.1 | 28.8 | 87.4 |
| 160 | 14QM066  | 30.9 | 85.6 | 31.5 | 7.0 | 5.0 | 30.5 | 88.1 |
| 161 | 14QM067  | 31.1 | 86.5 | 31.0 | 7.0 | 4.7 | 30.2 | 87.0 |
| 162 | 14QM067H | 30.7 | 84.2 | 29.6 | 7.0 | 4.9 | 28.5 | 85.3 |
| 163 | P♂       | 30.8 | 85.4 | 29.9 | 6.9 | 4.8 | 30.1 | 87.5 |
| 164 | 14QM068H | 32.2 | 86.4 | 30.4 | 7.1 | 4.8 | 28.2 | 86.7 |
| 165 | 14QM068  | 30.7 | 85.2 | 29.8 | 7.0 | 5.5 | 31.1 | 86.8 |
| 166 | 14QM069  | 28.6 | 84.8 | 28.1 | 6.8 | 4.9 | 28.3 | 86.5 |
| 167 | 14QM069H | 29.9 | 85.0 | 29.6 | 6.8 | 5.2 | 28.6 | 87.9 |
| 168 | P♂       | 29.7 | 85.6 | 29.6 | 6.9 | 5.1 | 30.1 | 87.5 |
| 169 | 14QM070H | 31.2 | 84.6 | 30.8 | 7.1 | 4.9 | 30.7 | 88.1 |
| 170 | 14QM070  | 30.8 | 85.0 | 30.4 | 7.0 | 4.6 | 31.7 | 85.7 |
| 171 | 14QM071  | 30.5 | 82.3 | 29.9 | 7.0 | 4.8 | 30.1 | 86.4 |
| 172 | 14QM071H | 31.0 | 84.7 | 30.6 | 6.9 | 4.8 | 29.9 | 87.7 |
| 173 | P♂       | 30.3 | 84.9 | 31.0 | 6.9 | 4.6 | 30.1 | 87.5 |
| 174 | 14QM072H | 31.3 | 85.3 | 31.2 | 7.0 | 4.8 | 30.3 | 89.4 |
| 175 | 14QM072  | 30.6 | 84.8 | 30.0 | 6.9 | 4.9 | 29.0 | 85.3 |
| 176 | 14QM073  | 31.5 | 86.4 | 32.7 | 7.0 | 4.8 | 30.1 | 88.4 |
| 177 | 14QM073H | 31.6 | 86.4 | 30.2 | 7.0 | 5.2 | 30.1 | 88.1 |
| 178 | P♂       | 30.6 | 86.9 | 29.7 | 6.9 | 4.6 | 30.1 | 87.5 |
| 179 | 14QM074H | 32.2 | 85.0 | 31.3 | 7.0 | 4.7 | 30.3 | 87.5 |
| 180 | 14QM074  | 30.9 | 84.2 | 31.4 | 6.9 | 4.5 | 30.2 | 86.7 |
| 181 | 14QM075  | 31.4 | 86.4 | 30.0 | 7.0 | 4.5 | 31.1 | 86.1 |
| 182 | 14QM075H | 31.7 | 86.5 | 31.1 | 7.1 | 4.5 | 29.5 | 86.6 |
| 183 | P♂       | 30.8 | 86.7 | 30.3 | 6.9 | 4.2 | 30.1 | 87.5 |
| 184 | 14QM076H | 30.2 | 86.2 | 29.3 | 7.0 | 5.2 | 29.4 | 86.3 |
| 185 | 14QM076  | 29.1 | 84.9 | 28.1 | 6.9 | 5.4 | 28.2 | 84.2 |
| 186 | 14QM077  | 29.7 | 86.1 | 30.9 | 7.1 | 5.2 | 28.8 | 88.0 |
| 187 | 14QM077H | 30.4 | 86.8 | 31.9 | 7.1 | 4.7 | 30.3 | 86.1 |
| 188 | P♂       | 30.2 | 85.1 | 31.7 | 7.1 | 4.2 | 30.1 | 87.5 |
| 189 | 14QM078H | 30.5 | 85.0 | 30.7 | 7.0 | 5.2 | 30.9 | 86.5 |
| 190 | 14QM078  | 30.1 | 84.9 | 29.6 | 6.9 | 5.1 | 29.0 | 86.3 |
| 191 | 14QM079  | 30.8 | 85.7 | 29.4 | 6.9 | 4.9 | 32.1 | 85.7 |
| 192 | 14QM079H | 31.4 | 85.6 | 29.9 | 6.9 | 4.5 | 29.8 | 87.3 |
| 193 | P♂       | 29.5 | 83.5 | 28.6 | 6.9 | 4.7 | 30.1 | 87.5 |
| 194 | 14QM080H | 30.8 | 86.5 | 31.5 | 7.0 | 4.5 | 29.9 | 87.3 |
| 195 | 14QM080  | 30.2 | 86.1 | 29.4 | 6.9 | 4.5 | 28.8 | 84.1 |
| 196 | 14QM081  | 29.8 | 85.9 | 30.9 | 7.0 | 4.4 | 30.3 | 85.6 |

|     |          |      |      |      |     |     |      |      |
|-----|----------|------|------|------|-----|-----|------|------|
| 197 | 14QM081H | 31.0 | 86.4 | 31.9 | 7.1 | 4.9 | 30.1 | 87.2 |
| 198 | P♂       | 29.8 | 85.6 | 29.3 | 6.9 | 4.2 | 30.1 | 87.5 |
| 199 | 14QM082H | 30.7 | 85.6 | 29.1 | 6.9 | 4.9 | 30.0 | 85.7 |
| 200 | 14QM082  | 32.8 | 85.2 | 34.5 | 7.0 | 4.0 | 31.5 | 86.0 |
| 201 | 14QM083  | 31.9 | 85.7 | 31.0 | 7.1 | 4.7 | 30.8 | 87.1 |
| 202 | 14QM083H | 30.4 | 86.2 | 30.7 | 7.1 | 5.1 | 28.3 | 86.4 |
| 203 | 14QM380  | 29.4 | 86.4 | 28.6 | 6.9 | 4.7 | 30.8 | 87.5 |
| 204 | 14QM084H | 30.5 | 87.3 | 28.6 | 7.0 | 5.2 | 31.2 | 87.6 |
| 205 | 14QM084  | 31.1 | 84.2 | 30.8 | 7.1 | 5.2 | 29.8 | 85.2 |
| 206 | 14QM085  | 31.3 | 85.7 | 33.0 | 7.1 | 4.5 | 29.9 | 79.3 |
| 207 | 14QM085H | 31.7 | 86.7 | 31.1 | 7.1 | 5.0 | 31.1 | 88.0 |
| 208 | P♂       | 30.3 | 86.1 | 30.3 | 7.0 | 4.6 | 30.8 | 87.5 |
| 209 | 14QM086H | 30.1 | 86.8 | 30.8 | 7.0 | 4.4 | 29.0 | 86.2 |
| 210 | 14QM086  | 31.4 | 87.6 | 31.8 | 7.2 | 4.4 | 30.8 | 87.7 |
| 211 | 14QM087  | 30.8 | 85.0 | 30.9 | 6.9 | 4.4 | 30.5 | 87.1 |
| 212 | 14QM087H | 30.2 | 85.2 | 29.9 | 6.9 | 4.8 | 29.0 | 85.7 |
| 213 | P♂       | 31.4 | 85.6 | 30.7 | 7.0 | 4.3 | 30.8 | 87.5 |
| 214 | 14QM088H | 32.5 | 86.9 | 33.9 | 7.1 | 4.4 | 32.0 | 85.8 |
| 215 | 14QM088  | 32.4 | 86.1 | 32.3 | 7.1 | 4.7 | 30.3 | 86.5 |
| 216 | 14QM089  | 29.5 | 84.6 | 29.4 | 6.9 | 5.5 | 28.9 | 85.9 |
| 217 | 14QM089H | 30.4 | 85.3 | 28.2 | 6.9 | 5.1 | 29.8 | 86.2 |
| 218 | P♂       | 30.5 | 84.8 | 30.9 | 7.0 | 4.4 | 30.8 | 87.5 |
| 219 | 14QM090H | 32.1 | 84.7 | 30.8 | 7.0 | 3.8 | 33.3 | 86.5 |
| 220 | 14QM090  | 33.3 | 84.8 | 34.8 | 7.1 | 3.9 | 34.3 | 85.5 |
| 221 | 14QM091  | 31.5 | 85.3 | 29.9 | 7.0 | 4.8 | 30.0 | 85.4 |
| 222 | 14QM091H | 30.7 | 85.4 | 30.5 | 7.0 | 4.5 | 30.2 | 87.0 |
| 223 | P♂       | 30.4 | 87.6 | 31.3 | 7.0 | 4.5 | 30.8 | 87.5 |
| 224 | P♂       | 30.0 | 87.3 | 29.4 | 6.9 | 4.9 | 29.5 | 86.0 |
| 225 | F1       | 31.3 | 85.0 | 31.3 | 7.0 | 4.7 | 30.4 | 86.1 |
| 226 | P♀       | 30.5 | 84.9 | 29.7 | 6.8 | 4.9 | 30.6 | 85.2 |
| 227 | P♂       | 29.6 | 85.9 | 30.3 | 6.9 | 4.5 | 30.8 | 87.5 |
| 228 | 14QM092H | 32.7 | 84.7 | 32.5 | 7.1 | 4.4 | 30.9 | 85.4 |
| 229 | 14QM092  | 32.3 | 84.8 | 32.5 | 7.0 | 3.8 | 31.4 | 87.2 |
| 230 | 14QM093  | 30.6 | 85.2 | 29.1 | 6.9 | 4.8 | 31.7 | 87.9 |
| 231 | 14QM093H | 31.5 | 83.6 | 32.9 | 7.1 | 4.1 | 30.1 | 85.5 |
| 232 | P♂       | 30.4 | 84.6 | 29.8 | 6.9 | 4.7 | 30.8 | 87.5 |
| 233 | 14QM094H | 30.2 | 85.8 | 29.7 | 6.9 | 4.8 | 28.9 | 85.9 |
| 234 | 14QM094  | 30.5 | 85.1 | 28.5 | 6.9 | 4.7 | 28.5 | 86.1 |
| 235 | 14QM095  | 29.2 | 86.0 | 28.7 | 6.9 | 5.2 | 28.4 | 89.2 |
| 236 | 14QM095H | 30.1 | 86.2 | 29.7 | 6.9 | 4.8 | 30.2 | 86.2 |
| 237 | P♂       | 29.7 | 85.0 | 29.6 | 6.9 | 4.2 | 30.8 | 87.5 |
| 238 | 14QM096H | 31.1 | 84.8 | 31.1 | 7.0 | 4.7 | 30.7 | 86.5 |
| 239 | 14QM096  | 31.7 | 85.8 | 31.4 | 7.1 | 4.3 | 30.7 | 86.8 |
| 240 | 14QM097  | 30.2 | 84.7 | 29.4 | 6.9 | 4.9 | 29.6 | 86.1 |
| 241 | 14QM097H | 29.8 | 84.8 | 29.9 | 6.9 | 4.4 | 30.7 | 87.1 |
| 242 | P♂       | 30.2 | 85.5 | 29.5 | 6.9 | 4.6 | 30.8 | 87.5 |
| 243 | 14QM098H | 30.1 | 86.7 | 29.3 | 7.0 | 5.0 | 30.5 | 87.2 |
| 244 | 14QM098  | 30.7 | 86.0 | 31.3 | 7.0 | 4.5 | 30.1 | 86.4 |
| 245 | 14QM099  | 30.2 | 84.9 | 29.4 | 6.9 | 5.3 | 29.6 | 87.5 |
| 246 | 14QM099H | 30.7 | 86.3 | 31.9 | 6.9 | 4.1 | 28.6 | 86.8 |

|     |          |      |      |      |     |     |      |      |
|-----|----------|------|------|------|-----|-----|------|------|
| 247 | P♂       | 31.2 | 86.4 | 31.2 | 7.0 | 4.5 | 30.8 | 87.5 |
| 248 | 14QM100H | 31.0 | 85.5 | 28.9 | 6.8 | 4.0 | 29.7 | 88.8 |
| 249 | 14QM100  | 30.0 | 86.6 | 28.9 | 6.9 | 5.1 | 30.6 | 85.4 |
| 250 | 14QM101  | 30.1 | 87.6 | 29.7 | 6.9 | 4.8 | 29.4 | 87.2 |
| 251 | 14QM101H | 30.8 | 85.6 | 32.0 | 7.1 | 4.8 | 31.2 | 87.1 |
| 252 | 14QM380  | 30.0 | 84.6 | 27.8 | 6.8 | 4.8 | 30.5 | 86.2 |
| 253 | 14QM102H | 31.0 | 84.6 | 29.8 | 7.0 | 4.7 | 30.3 | 85.8 |
| 254 | 14QM102  | 31.1 | 86.7 | 29.9 | 7.0 | 4.6 | 29.7 | 85.7 |
| 255 | 14QM103  | 32.8 | 85.8 | 31.2 | 7.0 | 5.0 | 32.4 | 87.4 |
| 256 | 14QM103H | 32.3 | 85.8 | 30.3 | 7.0 | 4.7 | 31.4 | 87.3 |
| 257 | P♂       | 29.1 | 84.1 | 28.6 | 6.9 | 4.7 | 30.5 | 86.2 |
| 258 | 14QM104H | 32.7 | 86.8 | 31.3 | 7.0 | 5.1 | 30.2 | 86.8 |
| 259 | 14QM104  | 32.7 | 85.7 | 32.4 | 7.0 | 4.3 | 31.1 | 87.4 |
| 260 | 14QM105  | 31.2 | 83.8 | 33.4 | 7.1 | 4.5 | 30.2 | 85.7 |
| 261 | 14QM105H | 31.5 | 84.9 | 30.0 | 7.0 | 5.0 | 29.9 | 86.0 |
| 262 | P♂       | 29.6 | 84.6 | 28.8 | 6.9 | 4.9 | 30.5 | 86.2 |
| 263 | 14QM106H | 32.0 | 85.9 | 29.7 | 7.0 | 5.0 | 30.4 | 86.9 |
| 264 | 14QM106  | 32.6 | 85.7 | 31.7 | 7.2 | 5.0 | 31.6 | 88.2 |
| 265 | 14QM107  | 30.0 | 85.1 | 31.0 | 6.9 | 5.1 | 30.4 | 86.3 |
| 266 | 14QM107H | 31.8 | 85.9 | 30.3 | 7.0 | 5.4 | 29.6 | 86.8 |
| 267 | P♂       | 32.3 | 85.3 | 30.0 | 7.0 | 4.4 | 30.5 | 86.2 |
| 268 | 14QM108H | 31.1 | 86.4 | 29.4 | 7.0 | 5.3 | 30.2 | 87.3 |
| 269 | 14QM108  | 31.4 | 85.1 | 28.1 | 6.9 | 4.7 | 30.6 | 85.4 |
| 270 | 14QM109  | 29.5 | 85.3 | 29.2 | 6.9 | 4.4 | 29.1 | 84.1 |
| 271 | 14QM109H | 30.8 | 85.0 | 29.1 | 6.9 | 4.8 | 30.7 | 87.4 |
| 272 | P♂       | 31.8 | 86.1 | 30.7 | 7.0 | 4.5 | 30.5 | 86.2 |
| 273 | 14QM110H | 31.1 | 86.2 | 31.4 | 7.0 | 5.3 | 30.3 | 86.5 |
| 274 | 14QM110  | 30.5 | 85.5 | 31.4 | 6.9 | 4.9 | 29.8 | 87.6 |
| 275 | 14QM111  | 31.4 | 87.1 | 29.3 | 7.1 | 4.6 | 29.7 | 87.8 |
| 276 | 14QM111H | 31.0 | 85.7 | 30.1 | 6.9 | 4.6 | 31.3 | 87.6 |
| 277 | P♂       | 31.0 | 85.8 | 30.8 | 6.9 | 4.4 | 30.5 | 86.2 |
| 278 | 14QM112H | 31.4 | 85.6 | 29.6 | 7.0 | 5.4 | 31.2 | 86.1 |
| 279 | 14QM112  | 30.2 | 85.4 | 27.5 | 6.9 | 5.3 | 31.8 | 87.7 |
| 280 | 14QM113  | 29.8 | 83.5 | 28.8 | 6.8 | 4.9 | 31.8 | 85.9 |
| 281 | 14QM113H | 31.4 | 85.8 | 31.5 | 7.0 | 4.0 | 30.6 | 87.0 |
| 282 | P♂       | 30.2 | 86.4 | 29.8 | 7.0 | 4.3 | 30.5 | 86.2 |
| 283 | 14QM114H | 31.4 | 86.0 | 28.9 | 6.9 | 4.8 | 30.1 | 85.9 |
| 284 | 14QM114  | 32.2 | 85.8 | 31.5 | 7.1 | 5.2 | 31.6 | 86.8 |
| 285 | 14QM115  | 32.0 | 86.1 | 29.8 | 7.0 | 5.1 | 30.4 | 87.1 |
| 286 | 14QM115H | 31.9 | 86.2 | 31.9 | 7.0 | 4.7 | 30.6 | 87.0 |
| 287 | P♂       | 29.9 | 84.8 | 28.2 | 6.8 | 4.5 | 30.5 | 86.2 |
| 288 | 14QM116H | 31.6 | 87.6 | 29.7 | 7.1 | 5.1 | 30.6 | 86.7 |
| 289 | 14QM116  | 31.8 | 85.4 | 29.3 | 7.0 | 4.7 | 29.7 | 87.3 |
| 290 | 14QM117  | 29.4 | 82.9 | 27.3 | 6.8 | 5.3 | 29.5 | 85.7 |
| 291 | 14QM117H | 30.8 | 83.6 | 27.0 | 6.9 | 5.3 | 30.1 | 85.2 |
| 292 | P♂       | 29.4 | 85.0 | 27.8 | 6.8 | 4.4 | 30.5 | 86.2 |
| 293 | 14QM118H | 30.7 | 86.2 | 29.9 | 6.9 | 4.5 | 31.7 | 86.1 |
| 294 | 14QM118  | 31.4 | 86.5 | 31.9 | 7.1 | 5.1 | 28.8 | 86.7 |
| 295 | 14QM119  | 31.1 | 85.5 | 30.4 | 7.0 | 5.0 | 32.1 | 84.6 |
| 296 | 14QM119H | 30.7 | 85.9 | 30.3 | 7.0 | 4.6 | 31.1 | 85.9 |



|     |          |      |      |      |     |     |      |      |
|-----|----------|------|------|------|-----|-----|------|------|
| 297 | P♂       | 29.8 | 85.9 | 28.6 | 6.9 | 4.7 | 30.5 | 86.2 |
| 298 | 14QM120H | 31.4 | 87.5 | 29.5 | 7.0 | 5.1 | 30.5 | 86.1 |
| 299 | 14QM120  | 30.4 | 86.2 | 31.3 | 6.9 | 4.5 | 29.0 | 84.6 |
| 300 | 14QM121  | 30.5 | 84.9 | 30.5 | 6.9 | 4.4 | 30.5 | 87.4 |
| 301 | 14QM121H | 31.0 | 85.7 | 29.8 | 7.0 | 4.7 | 30.8 | 87.0 |
| 302 | 14QM380  | 29.1 | 83.9 | 28.9 | 6.9 | 4.6 | 30.2 | 87.2 |
| 303 | 14QM122H | 31.1 | 85.6 | 30.3 | 6.9 | 4.0 | 30.5 | 87.2 |
| 304 | 14QM122  | 31.8 | 87.0 | 33.1 | 7.1 | 4.2 | 31.1 | 86.8 |
| 305 | 14QM123  | 31.2 | 86.6 | 31.8 | 7.0 | 4.5 | 30.9 | 87.6 |
| 306 | 14QM123H | 30.6 | 87.1 | 31.0 | 6.9 | 4.3 | 31.3 | 88.3 |
| 307 | P♂       | 29.5 | 85.6 | 28.6 | 6.9 | 5.1 | 30.2 | 87.2 |
| 308 | 14QM124H | 30.0 | 85.3 | 31.5 | 7.0 | 5.0 | 30.4 | 87.0 |
| 309 | 14QM124  | 31.2 | 86.0 | 29.6 | 7.0 | 5.1 | 30.5 | 87.0 |
| 310 | 14QM125  | 29.5 | 84.6 | 28.2 | 6.8 | 4.8 | 28.4 | 86.8 |
| 311 | 14QM125H | 30.4 | 84.9 | 28.7 | 6.9 | 5.1 | 28.0 | 86.1 |
| 312 | P♂       | -    | -    | -    | -   | -   | 30.2 | 87.2 |
| 313 | 14QM126H | 30.8 | 86.4 | 31.4 | 7.0 | 4.7 | 28.7 | 83.7 |
| 314 | 14QM126  | 30.7 | 84.5 | 30.9 | 7.0 | 5.4 | 29.8 | 86.9 |
| 315 | 14QM127  | 30.9 | 86.6 | 31.0 | 6.9 | 4.7 | 30.3 | 86.1 |
| 316 | 14QM127H | 31.3 | 85.7 | 31.0 | 6.9 | 4.3 | 30.4 | 86.3 |
| 317 | P♂       | 31.5 | 85.1 | 30.4 | 6.9 | 4.6 | 30.2 | 87.2 |
| 318 | 14QM128H | 32.1 | 85.3 | 29.5 | 7.0 | 4.5 | 31.3 | 86.3 |
| 319 | 14QM128  | 31.3 | 83.5 | 30.6 | 6.9 | 3.7 | 31.3 | 84.6 |
| 320 | 14QM129  | 31.0 | 86.0 | 30.4 | 7.0 | 4.6 | 31.1 | 86.4 |
| 321 | 14QM129H | 31.3 | 85.6 | 31.3 | 6.9 | 4.2 | 30.7 | 85.9 |
| 322 | P♂       | 30.6 | 85.4 | 29.7 | 6.9 | 4.6 | 30.2 | 87.2 |
| 323 | 14QM130H | 32.3 | 86.7 | 31.6 | 7.0 | 4.3 | 30.8 | 87.2 |
| 324 | 14QM130  | 30.9 | 84.3 | 31.6 | 7.0 | 4.2 | 30.8 | 84.9 |
| 325 | 14QM131  | 32.4 | 86.4 | 32.2 | 7.0 | 4.1 | 30.1 | 85.3 |
| 326 | 14QM131H | 32.3 | 85.6 | 31.5 | 7.0 | 5.0 | 32.1 | 85.5 |
| 327 | P♂       | 31.5 | 86.4 | 29.2 | 6.9 | 4.6 | 30.2 | 87.2 |
| 328 | 14QM132H | 29.6 | 84.3 | 27.8 | 6.9 | 5.5 | 30.2 | 84.5 |
| 329 | 14QM132  | 30.2 | 85.4 | 30.1 | 7.0 | 4.4 | 29.7 | 87.2 |
| 330 | 14QM133  | 31.1 | 86.7 | 30.3 | 6.9 | 4.6 | 30.3 | 83.8 |
| 331 | 14QM133H | 31.9 | 85.8 | 31.9 | 7.1 | 5.1 | 29.6 | 86.8 |
| 332 | P♂       | 30.0 | 85.2 | 28.1 | 6.8 | 4.5 | 30.2 | 87.2 |
| 333 | 14QM134H | 30.4 | 85.6 | 29.6 | 6.9 | 4.6 | 29.6 | 86.9 |
| 334 | 14QM134  | 30.9 | 85.2 | 29.9 | 7.0 | 4.9 | 28.9 | 86.0 |
| 335 | 14QM135  | 31.3 | 82.7 | 28.8 | 6.9 | 3.7 | 31.0 | 86.2 |
| 336 | 14QM135H | 32.5 | 85.5 | 30.6 | 7.0 | 5.0 | 30.6 | 85.8 |
| 337 | P♂       | 30.6 | 85.2 | 28.7 | 6.9 | 4.3 | 30.2 | 87.2 |
| 338 | 14QM136H | 32.2 | 86.2 | 30.7 | 7.0 | 4.7 | 31.6 | 85.8 |
| 339 | 14QM136  | 31.5 | 85.8 | 31.2 | 6.9 | 4.9 | 31.3 | 85.3 |
| 340 | 14QM137  | 31.6 | 81.7 | 34.9 | 7.0 | 3.8 | 31.2 | 84.9 |
| 341 | 14QM137H | 30.3 | 85.0 | 32.1 | 6.9 | 4.5 | 31.1 | 86.2 |
| 342 | P♂       | 32.2 | 84.4 | 35.3 | 7.1 | 4.1 | 30.2 | 87.2 |
| 343 | 14QM138H | 31.1 | 86.1 | 31.2 | 6.9 | 4.6 | 29.6 | 83.7 |
| 344 | 14QM138  | 31.4 | 86.0 | 31.0 | 6.9 | 4.3 | 29.7 | 86.0 |
| 345 | 14QM139  | 30.9 | 86.1 | 29.9 | 7.0 | 4.7 | 28.5 | 85.4 |
| 346 | 14QM139H | 31.5 | 87.4 | 31.3 | 7.0 | 4.3 | 31.4 | 85.7 |

|     |          |      |      |      |     |     |      |      |
|-----|----------|------|------|------|-----|-----|------|------|
| 347 | P♂       | 31.2 | 85.8 | 29.7 | 7.0 | 4.8 | 30.2 | 87.2 |
| 348 | 14QM140H | 31.8 | 85.8 | 31.8 | 7.0 | 4.9 | 33.1 | 86.9 |
| 349 | 14QM140  | 31.4 | 84.7 | 31.6 | 6.9 | 4.3 | 30.8 | 86.4 |
| 350 | 14QM141  | 30.3 | 86.7 | 30.2 | 7.0 | 5.2 | 30.9 | 85.8 |
| 351 | 14QM141H | 31.3 | 86.3 | 31.4 | 7.0 | 4.7 | 30.3 | 85.9 |
| 352 | 14QM380  | 31.4 | 86.9 | 30.0 | 7.0 | 4.3 | 29.3 | 87.2 |
| 353 | 14QM142H | 32.3 | 86.8 | 30.2 | 7.0 | 4.6 | 30.3 | 86.9 |
| 354 | 14QM142  | 31.5 | 86.1 | 32.1 | 7.0 | 4.1 | 31.3 | 84.7 |
| 355 | 14QM143  | 31.8 | 86.7 | 34.5 | 7.1 | 4.6 | 29.5 | 86.6 |
| 356 | 14QM143H | 31.2 | 86.4 | 33.2 | 6.9 | 3.9 | 29.6 | 86.3 |
| 357 | P♂       | 31.0 | 86.3 | 29.2 | 6.9 | 4.7 | 29.3 | 87.2 |
| 358 | 14QM144H | 31.7 | 86.5 | 31.3 | 7.0 | 4.6 | 29.7 | 85.4 |
| 359 | 14QM144  | -    | -    | -    | -   | -   | 27.3 | 82.7 |
| 360 | 14QM145  | 31.0 | 86.2 | 28.4 | 6.9 | 4.4 | 29.7 | 87.4 |
| 361 | 14QM145H | 31.6 | 86.1 | 31.2 | 7.0 | 4.7 | 29.9 | 86.5 |
| 362 | P♂       | 29.9 | 85.8 | 29.1 | 6.8 | 4.4 | 29.3 | 87.2 |
| 363 | 14QM146H | 30.3 | 87.8 | 30.6 | 6.9 | 4.8 | 31.1 | 87.6 |
| 364 | 14QM146  | 29.8 | 86.7 | 29.7 | 6.9 | 4.2 | 31.5 | 86.7 |
| 365 | 14QM147  | 32.7 | 88.3 | 30.4 | 7.2 | 4.4 | 31.6 | 84.8 |
| 366 | 14QM147H | 32.6 | 86.6 | 30.4 | 7.0 | 4.4 | 32.1 | 85.3 |
| 367 | P♂       | 31.1 | 86.2 | 31.0 | 6.9 | 4.7 | 29.3 | 87.2 |
| 368 | 14QM148H | 32.2 | 87.5 | 32.2 | 7.0 | 4.1 | 31.5 | 87.5 |
| 369 | 14QM148  | 31.9 | 86.6 | 32.6 | 7.0 | 4.2 | 31.4 | 86.4 |
| 370 | 14QM149  | 31.9 | 86.7 | 32.0 | 7.0 | 4.2 | 31.9 | 86.0 |
| 371 | 14QM149H | 31.3 | 85.6 | 30.9 | 6.9 | 3.9 | 32.2 | 84.6 |
| 372 | P♂       | 30.3 | 85.4 | 30.2 | 6.9 | 4.5 | 29.3 | 87.2 |
| 373 | 14QM150H | 31.9 | 86.9 | 30.3 | 7.0 | 4.7 | 30.6 | 85.4 |
| 374 | 14QM150  | 31.8 | 87.8 | 33.5 | 7.1 | 4.6 | 30.9 | 86.3 |
| 375 | 14QM151  | 30.7 | 87.8 | 31.3 | 6.9 | 4.5 | 30.7 | 86.3 |
| 376 | 14QM151H | 31.3 | 87.4 | 33.5 | 7.0 | 4.2 | 30.3 | 86.6 |
| 377 | P♂       | 28.2 | 85.7 | 26.7 | 6.8 | 4.8 | 29.3 | 87.2 |
| 378 | 14QM152H | 31.4 | 87.0 | 31.7 | 7.0 | 4.2 | 30.4 | 85.7 |
| 379 | 14QM152  | 31.2 | 86.6 | 31.9 | 6.9 | 4.3 | 30.2 | 87.5 |
| 380 | 14QM153  | 29.9 | 87.2 | 31.0 | 6.9 | 4.7 | 30.0 | 86.8 |
| 381 | 14QM153H | 31.2 | 87.4 | 31.4 | 7.0 | 5.1 | 30.5 | 85.6 |
| 382 | P♂       | 31.3 | 86.8 | 29.7 | 6.9 | 4.5 | 29.3 | 87.2 |
| 383 | 14QM154H | 31.3 | 85.9 | 30.3 | 7.0 | 4.5 | 29.7 | 85.3 |
| 384 | 14QM154  | 31.4 | 86.6 | 29.8 | 6.9 | 4.7 | 31.9 | 85.3 |
| 385 | 14QM155  | 31.4 | 87.7 | 34.2 | 7.1 | 4.8 | 30.6 | 85.4 |
| 386 | 14QM155H | 31.0 | 86.6 | 29.9 | 6.9 | 4.8 | 29.3 | 87.6 |
| 387 | P♂       | 30.4 | 88.2 | 31.2 | 6.9 | 4.1 | 29.3 | 87.2 |
| 388 | 14QM156H | 31.6 | 86.0 | 30.3 | 7.0 | 4.7 | 31.3 | 83.5 |
| 389 | 14QM156  | 30.8 | 85.0 | 31.1 | 7.0 | 4.4 | 30.4 | 86.7 |
| 390 | 14QM157  | 32.5 | 85.0 | 30.4 | 7.0 | 4.6 | 31.0 | 86.4 |
| 391 | 14QM157H | 31.9 | 86.3 | 30.0 | 7.0 | 4.4 | 31.6 | 85.0 |
| 392 | P♂       | 31.7 | 86.7 | 31.4 | 7.0 | 4.2 | 29.3 | 87.2 |
| 393 | 14QM158H | 30.2 | 86.0 | 29.2 | 6.9 | 4.8 | 28.2 | 84.7 |
| 394 | 14QM158  | 29.2 | 86.3 | 28.4 | 6.9 | 5.1 | 24.4 | 82.7 |
| 395 | 14QM159  | 32.9 | 87.8 | 29.7 | 7.1 | 4.7 | 32.5 | 86.3 |
| 396 | 14QM159H | 32.8 | 86.9 | 31.4 | 7.2 | 4.6 | 31.0 | 86.3 |

|     |          |      |      |      |     |     |      |      |
|-----|----------|------|------|------|-----|-----|------|------|
| 397 | P♂       | 31.6 | 86.4 | 30.9 | 6.9 | 4.6 | 29.3 | 87.2 |
| 398 | 14QM160H | 31.3 | 87.3 | 31.3 | 7.0 | 4.7 | 31.2 | 85.6 |
| 399 | 14QM160  | 31.9 | 86.2 | 31.3 | 6.9 | 4.6 | 30.9 | 86.2 |
| 400 | 14QM161  | 31.3 | 85.4 | 29.4 | 6.9 | 4.6 | 29.6 | 85.9 |
| 401 | 14QM161H | 30.8 | 86.1 | 29.2 | 7.0 | 5.1 | 30.5 | 87.1 |
| 402 | 14QM380  | 29.9 | 85.7 | 29.4 | 6.9 | 4.8 | 29.7 | 87.5 |
| 403 | 14QM162H | 31.0 | 86.7 | 31.0 | 7.1 | 4.8 | 29.4 | 85.5 |
| 404 | 14QM162  | 30.3 | 87.5 | 30.2 | 7.0 | 5.5 | 28.7 | 86.4 |
| 405 | 14QM163  | 32.4 | 87.0 | 32.4 | 7.1 | 4.5 | 31.3 | 86.1 |
| 406 | 14QM163H | 31.3 | 87.9 | 32.0 | 7.0 | 4.7 | 31.3 | 85.7 |
| 407 | P♂       | 30.1 | 86.4 | 30.5 | 7.0 | 5.1 | 29.7 | 87.5 |
| 408 | 14QM164H | 31.3 | 87.5 | 33.7 | 7.1 | 4.1 | 29.4 | 85.1 |
| 409 | 14QM164  | 30.3 | 87.9 | 30.2 | 7.0 | 4.6 | 28.4 | 87.0 |
| 410 | 14QM165  | 31.4 | 84.0 | 33.5 | 6.9 | 4.2 | 29.2 | 85.0 |
| 411 | 14QM165H | 31.9 | 87.1 | 32.5 | 6.9 | 4.2 | 31.5 | 86.5 |
| 412 | P♂       | 30.7 | 87.6 | 28.7 | 7.0 | 4.8 | 29.7 | 87.5 |
| 413 | 14QM166H | 33.4 | 86.9 | 32.2 | 7.0 | 4.5 | 30.4 | 85.6 |
| 414 | 14QM166  | 33.4 | 86.8 | 32.8 | 7.0 | 4.2 | 31.4 | 87.6 |
| 415 | 14QM167  | 32.2 | 85.8 | 32.8 | 7.0 | 4.0 | 31.4 | 85.6 |
| 416 | 14QM167H | 32.4 | 86.8 | 33.5 | 7.0 | 4.3 | 31.1 | 83.5 |
| 417 | P♂       | 30.4 | 86.5 | 30.2 | 6.9 | 4.7 | 29.7 | 87.5 |
| 418 | 14QM168H | 31.3 | 86.8 | 30.7 | 7.0 | 4.6 | 29.9 | 85.0 |
| 419 | 14QM168  | 30.0 | 85.9 | 27.7 | 6.8 | 5.1 | 29.2 | 85.0 |
| 420 | 14QM169  | 30.0 | 85.3 | 29.1 | 6.9 | 5.2 | 28.7 | 86.9 |
| 421 | 14QM169H | 29.8 | 87.5 | 28.3 | 6.9 | 5.3 | 28.7 | 86.0 |
| 422 | P♂       | 30.7 | 88.0 | 30.3 | 7.0 | 4.6 | 29.7 | 87.5 |
| 423 | 14QM170H | 29.8 | 85.6 | 28.7 | 6.9 | 4.8 | 29.6 | 86.0 |
| 424 | 14QM170  | 30.1 | 86.7 | 29.2 | 7.1 | 4.9 | 29.7 | 86.2 |
| 425 | 14QM171  | 30.7 | 86.7 | 31.8 | 7.0 | 5.1 | 29.3 | 86.7 |
| 426 | 14QM171H | 30.2 | 86.4 | 29.2 | 6.9 | 4.8 | 30.2 | 85.5 |
| 427 | P♂       | 31.4 | 86.2 | 29.9 | 7.0 | 5.1 | 29.7 | 87.5 |
| 428 | 14QM172H | 31.5 | 84.4 | 31.7 | 7.0 | 4.3 | 30.7 | 84.9 |
| 429 | 14QM172  | 32.0 | 86.6 | 30.7 | 7.1 | 5.0 | 29.5 | 85.5 |
| 430 | 14QM173  | 31.3 | 85.2 | 30.8 | 7.1 | 4.8 | 31.0 | 85.3 |
| 431 | 14QM173H | 30.8 | 85.8 | 30.7 | 7.0 | 4.8 | 30.4 | 84.2 |
| 432 | P♂       | 29.9 | 86.6 | 30.2 | 7.0 | 4.4 | 29.7 | 87.5 |
| 433 | 14QM174H | 30.6 | 85.7 | 30.8 | 6.9 | 4.4 | 26.8 | 84.2 |
| 434 | 14QM174  | 30.5 | 84.9 | 31.3 | 6.9 | 4.3 | 25.2 | 84.2 |
| 435 | 14QM175  | 30.8 | 86.3 | 30.5 | 7.0 | 5.3 | 27.5 | 83.0 |
| 436 | 14QM175H | 31.6 | 86.9 | 31.3 | 7.1 | 5.0 | 31.1 | 86.3 |
| 437 | P♂       | 30.2 | 85.5 | 29.3 | 6.9 | 5.0 | 29.7 | 87.5 |
| 438 | 14QM176H | 32.4 | 85.4 | 32.9 | 7.0 | 4.5 | 31.4 | 85.0 |
| 439 | 14QM176  | 32.5 | 85.0 | 33.3 | 7.0 | 4.5 | 31.4 | 84.2 |
| 440 | 14QM177  | 29.7 | 85.7 | 29.5 | 7.1 | 5.2 | 30.1 | 85.5 |
| 441 | 14QM177H | 30.3 | 87.0 | 29.3 | 6.9 | 4.9 | 29.3 | 87.3 |
| 442 | P♂       | 31.0 | 87.1 | 29.3 | 6.9 | 5.0 | 29.7 | 87.5 |
| 443 | 14QM178H | 31.9 | 87.4 | 32.6 | 7.1 | 5.1 | 29.2 | 84.2 |
| 444 | 14QM178  | 30.7 | 85.6 | 31.2 | 7.0 | 4.5 | 31.6 | 85.6 |
| 445 | 14QM179  | 31.7 | 85.9 | 31.5 | 7.1 | 5.0 | 31.0 | 85.6 |
| 446 | 14QM179H | 31.0 | 86.1 | 29.2 | 7.0 | 5.2 | 31.5 | 86.2 |

|     |          |      |      |      |     |     |      |      |
|-----|----------|------|------|------|-----|-----|------|------|
| 447 | P♂       | 31.6 | 85.5 | 32.8 | 7.1 | 4.2 | 29.7 | 87.5 |
| 448 | P♂       | 31.9 | 85.9 | 30.9 | 6.9 | 4.4 | 29.2 | 86.7 |
| 449 | F1       | 31.4 | 85.7 | 31.8 | 7.0 | 4.3 | 31.4 | 86.2 |
| 450 | P♀       | 30.6 | 85.8 | 31.2 | 7.0 | 5.4 | 31.8 | 85.4 |
| 451 | 14QM003  | 29.7 | 85.6 | 30.7 | 7.0 | 5.2 | 29.4 | 85.2 |
| 452 | 14QM003H | 30.1 | 85.8 | 29.7 | 7.0 | 5.4 | 29.2 | 84.0 |
| 453 | 14QM380  | 30.1 | 86.2 | 28.8 | 7.0 | 5.0 | 29.7 | 86.0 |
| 454 | 14QM004H | 30.4 | 85.3 | 31.2 | 6.9 | 5.1 | 31.0 | 86.1 |
| 455 | 14QM004  | 30.2 | 85.6 | 29.3 | 6.9 | 5.0 | 30.9 | 86.6 |
| 456 | 14QM005  | 32.1 | 83.8 | 32.3 | 7.0 | 5.0 | 32.0 | 85.0 |
| 457 | 14QM005H | 30.9 | 85.9 | 31.9 | 7.0 | 5.3 | 30.6 | 85.7 |
| 458 | P♂       | 31.2 | 86.6 | 30.6 | 7.0 | 5.0 | 29.7 | 86.0 |
| 459 | 14QM006H | 31.3 | 87.2 | 31.7 | 7.1 | 5.3 | 30.3 | 85.0 |
| 460 | 14QM006  | 32.1 | 86.2 | 33.5 | 7.0 | 5.2 | 31.5 | 86.0 |
| 461 | 14QM007  | 30.9 | 86.9 | 30.1 | 7.1 | 5.1 | 29.5 | 84.3 |
| 462 | 14QM007H | 30.8 | 86.8 | 29.7 | 7.0 | 5.2 | 29.6 | 87.2 |
| 463 | P♂       | 30.0 | 84.9 | 29.3 | 6.9 | 4.5 | 29.7 | 86.0 |
| 464 | 14QM008H | 32.1 | 85.4 | 31.5 | 7.0 | 4.1 | 31.4 | 85.3 |
| 465 | 14QM008  | 30.9 | 84.9 | 31.5 | 7.0 | 4.0 | 30.6 | 85.8 |
| 466 | 14QM009  | 29.1 | 85.8 | 28.6 | 6.9 | 4.9 | 29.1 | 87.2 |
| 467 | 14QM009H | 31.7 | 85.9 | 31.4 | 7.0 | 5.0 | 29.7 | 87.8 |
| 468 | P♂       | 29.7 | 86.8 | 29.8 | 6.9 | 4.1 | 29.7 | 86.0 |
| 469 | 14QM010H | 31.2 | 84.9 | 32.9 | 7.0 | 4.3 | 31.4 | 84.9 |
| 470 | 14QM010  | 30.8 | 82.1 | 33.1 | 7.0 | 4.3 | 31.6 | 87.8 |
| 471 | 14QM011  | 31.4 | 86.4 | 32.1 | 7.0 | 5.3 | 30.0 | 86.0 |
| 472 | 14QM011H | 32.0 | 87.4 | 29.9 | 7.0 | 4.9 | 31.1 | 85.6 |
| 473 | P♂       | 31.1 | 84.0 | 30.9 | 6.9 | 4.7 | 29.7 | 86.0 |
| 474 | 14QM012H | 32.3 | 86.4 | 34.1 | 7.1 | 4.6 | 30.3 | 85.4 |
| 475 | 14QM012  | 31.3 | 84.5 | 32.9 | 6.9 | 4.3 | 30.0 | 86.6 |
| 476 | 14QM013  | 30.4 | 85.7 | 29.1 | 7.0 | 4.9 | 29.5 | 84.1 |
| 477 | 14QM013H | 30.9 | 86.1 | 30.4 | 7.0 | 4.5 | 28.8 | 87.3 |
| 478 | P♂       | 31.0 | 86.2 | 31.3 | 7.0 | 4.6 | 29.7 | 86.0 |
| 479 | 14QM014H | 30.1 | 85.4 | 29.5 | 6.9 | 4.7 | 29.7 | 87.0 |
| 480 | 14QM014  | 30.5 | 85.8 | 28.5 | 6.9 | 4.4 | 30.2 | 85.3 |
| 481 | 14QM015  | 30.7 | 86.9 | 29.3 | 7.1 | 4.7 | 29.3 | 85.1 |
| 482 | 14QM015H | 30.2 | 85.4 | 28.0 | 6.9 | 5.2 | 28.7 | 87.6 |
| 483 | P♂       | 31.3 | 86.3 | 30.8 | 7.0 | 4.8 | 29.7 | 86.0 |
| 484 | 14QM016H | 31.7 | 86.3 | 31.0 | 7.0 | 5.0 | 30.1 | 85.8 |
| 485 | 14QM016  | 31.7 | 85.2 | 32.2 | 7.0 | 4.5 | 30.1 | 86.3 |
| 486 | 14QM017  | 32.1 | 85.3 | 31.4 | 7.2 | 4.3 | 31.0 | 86.6 |
| 487 | 14QM017H | 31.1 | 85.6 | 33.0 | 7.1 | 4.0 | 30.4 | 85.6 |
| 488 | P♂       | 30.1 | 86.9 | 31.7 | 6.9 | 4.3 | 29.7 | 86.0 |
| 489 | 14QM018H | 32.1 | 85.6 | 32.5 | 7.0 | 4.0 | 31.5 | 84.9 |
| 490 | 14QM018  | 32.2 | 85.8 | 34.4 | 7.0 | 4.1 | 30.8 | 84.8 |
| 491 | 14QM019  | 31.2 | 85.5 | 33.1 | 7.1 | 4.3 | 30.0 | 85.9 |
| 492 | 14QM019H | 29.9 | 85.9 | 31.7 | 7.1 | 4.8 | 31.0 | 85.3 |
| 493 | P♂       | 30.7 | 85.9 | 30.4 | 7.0 | 5.0 | 29.7 | 86.0 |
| 494 | 14QM020H | 31.9 | 86.0 | 31.9 | 7.1 | 4.9 | 30.2 | 86.2 |
| 495 | 14QM020  | 31.1 | 84.9 | 31.4 | 6.9 | 4.2 | 30.6 | 83.2 |
| 496 | 14QM021  | 30.0 | 85.0 | 30.9 | 7.0 | 4.9 | 31.2 | 85.0 |

|     |          |      |      |      |     |     |      |      |
|-----|----------|------|------|------|-----|-----|------|------|
| 497 | 14QM021H | 29.9 | 85.4 | 29.9 | 7.0 | 4.9 | 30.2 | 86.2 |
| 498 | P♂       | -    | -    | -    | -   | -   | 29.7 | 86.0 |
| 499 | 14QM022H | 31.5 | 85.9 | 31.0 | 7.0 | 4.5 | 31.3 | 86.4 |
| 500 | 14QM022  | 31.2 | 85.4 | 30.6 | 6.9 | 3.9 | 32.1 | 86.7 |
| 501 | 14QM023  | 31.8 | 85.6 | 31.2 | 7.1 | 4.2 | 31.8 | 84.6 |
| 502 | 14QM023H | 30.8 | 85.9 | 30.8 | 7.0 | 4.5 | 31.0 | 85.5 |
| 503 | 14QM380  | 30.6 | 86.4 | 30.0 | 6.9 | 4.9 | 29.4 | 85.9 |
| 504 | 14QM024H | 31.9 | 86.2 | 31.9 | 7.1 | 4.6 | 31.7 | 87.6 |
| 505 | 14QM024  | 32.2 | 86.1 | 32.8 | 7.2 | 4.4 | 32.1 | 86.3 |
| 506 | 14QM025  | -    | -    | -    | -   | -   | 30.5 | 87.2 |
| 507 | 14QM025H | 31.5 | 87.2 | 33.1 | 7.0 | 4.3 | 30.4 | 86.7 |
| 508 | P♂       | 30.5 | 86.2 | 30.2 | 7.0 | 4.7 | 29.4 | 85.9 |
| 509 | 14QM026H | 30.5 | 88.2 | 28.6 | 7.0 | 5.1 | 30.8 | 87.7 |
| 510 | 14QM026  | 31.5 | 87.1 | 30.1 | 7.1 | 4.9 | 31.2 | 86.5 |
| 511 | 14QM027  | 30.4 | 86.3 | 30.1 | 7.1 | 4.7 | 30.2 | 87.0 |
| 512 | 14QM027H | 30.8 | 88.4 | 29.7 | 7.2 | 5.2 | 29.5 | 88.4 |
| 513 | P♂       | 29.9 | 87.0 | 29.6 | 6.9 | 4.4 | 29.4 | 85.9 |
| 514 | 14QM028H | 31.4 | 86.8 | 30.3 | 7.0 | 5.0 | 29.4 | 86.6 |
| 515 | 14QM028  | 30.6 | 86.6 | 31.9 | 7.1 | 4.6 | 29.7 | 88.9 |
| 516 | 14QM029  | 31.3 | 86.7 | 30.4 | 7.2 | 4.6 | 32.3 | 86.5 |
| 517 | 14QM029H | 31.5 | 86.5 | 30.3 | 7.0 | 4.7 | 31.0 | 86.5 |
| 518 | P♂       | 30.2 | 86.4 | 29.1 | 7.0 | 4.6 | 29.4 | 85.9 |
| 519 | 14QM030H | 31.8 | 85.6 | 31.9 | 7.1 | 4.1 | 31.3 | 85.4 |
| 520 | 14QM030  | 31.8 | 86.4 | 31.0 | 7.1 | 4.1 | 30.8 | 85.8 |
| 521 | 14QM031  | 32.2 | 85.6 | 31.2 | 7.3 | 4.5 | 31.7 | 86.3 |
| 522 | 14QM031H | 32.0 | 86.4 | 31.7 | 7.1 | 4.1 | 31.2 | 85.6 |
| 523 | P♂       | 31.7 | 86.7 | 30.8 | 6.9 | 4.7 | 29.4 | 85.9 |
| 524 | 14QM032H | 31.3 | 86.5 | 33.0 | 7.0 | 4.3 | 30.2 | 86.4 |
| 525 | 14QM032  | 31.4 | 86.0 | 31.6 | 7.1 | 5.0 | 30.6 | 85.7 |
| 526 | 14QM033  | 30.4 | 86.7 | 31.0 | 7.0 | 5.6 | 28.1 | 88.0 |
| 527 | 14QM033H | 30.6 | 87.2 | 30.3 | 7.1 | 5.4 | 29.4 | 85.6 |
| 528 | P♂       | 29.8 | 81.8 | 29.1 | 7.0 | 5.2 | 29.4 | 85.9 |
| 529 | 14QM034H | 31.4 | 86.0 | 30.5 | 7.1 | 5.3 | 30.0 | 87.6 |
| 530 | 14QM034  | 31.1 | 86.7 | 33.0 | 7.1 | 5.1 | 31.1 | 87.2 |
| 531 | 14QM035  | 31.6 | 85.9 | 31.9 | 6.9 | 4.5 | 29.6 | 85.8 |
| 532 | 14QM035H | 31.7 | 85.2 | 31.5 | 7.0 | 4.5 | 31.4 | 86.5 |
| 533 | P♂       | 30.6 | 86.6 | 30.1 | 7.0 | 4.7 | 29.4 | 85.9 |
| 534 | 14QM036H | 31.3 | 85.8 | 30.4 | 7.0 | 5.0 | 29.8 | 87.3 |
| 535 | 14QM036  | 31.8 | 85.1 | 30.6 | 7.1 | 4.4 | 29.4 | 86.4 |
| 536 | 14QM037  | 30.3 | 86.1 | 29.4 | 6.9 | 5.2 | 31.0 | 87.2 |
| 537 | 14QM037H | 31.3 | 86.7 | 30.2 | 6.9 | 5.2 | 30.2 | 86.9 |
| 538 | P♂       | 30.6 | 85.7 | 29.8 | 6.9 | 5.0 | 29.4 | 85.9 |
| 539 | 14QM038H | 31.1 | 85.8 | 29.6 | 7.0 | 5.1 | 30.1 | 87.7 |
| 540 | 14QM038  | 29.4 | 85.8 | 27.7 | 6.9 | 4.6 | 28.2 | 85.8 |
| 541 | 14QM039  | 30.1 | 87.3 | 30.6 | 7.0 | 5.1 | 29.4 | 86.5 |
| 542 | 14QM039H | 31.0 | 84.9 | 31.3 | 7.0 | 4.9 | 30.2 | 85.9 |
| 543 | P♂       | 30.7 | 84.7 | 29.9 | 6.9 | 4.9 | 29.4 | 85.9 |
| 544 | 14QM040H | 30.1 | 84.7 | 30.5 | 7.0 | 5.1 | 29.5 | 85.8 |
| 545 | 14QM040  | 29.8 | 85.6 | 28.7 | 6.9 | 5.1 | 29.0 | 86.0 |
| 546 | 14QM041  | 30.6 | 84.6 | 29.3 | 6.9 | 4.8 | 31.4 | 86.6 |

|     |          |      |      |      |     |     |      |      |
|-----|----------|------|------|------|-----|-----|------|------|
| 547 | 14QM041H | 30.6 | 85.3 | 31.4 | 7.0 | 4.4 | 30.1 | 86.0 |
| 548 | P♂       | 28.8 | 87.2 | 28.2 | 6.9 | 5.0 | 29.4 | 85.9 |
| 549 | 14QM042H | 30.0 | 86.8 | 28.4 | 7.0 | 5.2 | 28.3 | 85.6 |
| 550 | 14QM042  | 30.0 | 85.8 | 28.7 | 7.0 | 5.1 | 27.1 | 84.2 |
| 551 | 14QM043  | 29.6 | 85.4 | 28.0 | 6.9 | 5.5 | 28.0 | 85.2 |
| 552 | 14QM043H | 30.1 | 85.5 | 28.2 | 6.9 | 5.3 | 30.3 | 85.8 |
| 553 | 14QM380  | 30.3 | 85.8 | 29.1 | 6.8 | 5.0 | 28.4 | 83.5 |
| 554 | 14QM044H | 31.3 | 85.8 | 30.5 | 7.0 | 4.8 | 29.2 | 86.4 |
| 555 | 14QM044  | 30.4 | 85.8 | 29.6 | 7.0 | 5.0 | 30.3 | 86.5 |
| 556 | 14QM045  | 31.3 | 87.3 | 31.6 | 6.9 | 4.6 | 30.8 | 85.8 |
| 557 | 14QM045H | 31.6 | 85.9 | 29.2 | 7.0 | 5.1 | 31.0 | 86.4 |
| 558 | P♂       | 30.0 | 84.3 | 30.6 | 6.9 | 5.0 | 28.4 | 83.5 |
| 559 | 14QM046H | 30.1 | 87.2 | 30.4 | 7.0 | 4.9 | 30.4 | 86.7 |
| 560 | 14QM046  | 29.8 | 86.3 | 28.3 | 6.9 | 5.0 | 29.5 | 87.0 |
| 561 | 14QM047  | 31.1 | 85.5 | 31.1 | 7.0 | 5.6 | 31.1 | 86.0 |
| 562 | 14QM047H | 31.9 | 85.5 | 32.3 | 7.2 | 5.1 | 30.9 | 86.8 |
| 563 | P♂       | 29.0 | 85.5 | 28.0 | 6.8 | 4.6 | 28.4 | 83.5 |
| 564 | 14QM048H | 29.3 | 85.8 | 29.2 | 7.0 | 5.1 | 30.4 | 85.7 |
| 565 | 14QM048  | 30.6 | 86.4 | 30.8 | 7.0 | 4.8 | 28.9 | 86.5 |
| 566 | 14QM049  | 30.6 | 86.4 | 30.7 | 7.0 | 4.7 | 29.1 | 87.3 |
| 567 | 14QM049H | 30.4 | 85.6 | 30.1 | 6.9 | 4.9 | 29.2 | 87.6 |
| 568 | P♂       | -    | -    | -    | -   | -   | 28.4 | 83.5 |
| 569 | 14QM050H | 31.2 | 86.0 | 30.8 | 7.0 | 5.1 | 30.0 | 86.7 |
| 570 | 14QM050  | 33.5 | 85.1 | 32.4 | 7.1 | 5.1 | 31.5 | 85.4 |
| 571 | 14QM051  | 31.8 | 85.3 | 30.0 | 6.9 | 4.8 | 31.5 | 87.8 |
| 572 | 14QM051H | 31.8 | 85.9 | 30.9 | 7.1 | 5.0 | 32.0 | 85.6 |
| 573 | P♂       | 31.3 | 86.5 | 31.1 | 7.0 | 4.9 | 28.4 | 83.5 |
| 574 | 14QM052H | 31.5 | 86.4 | 31.1 | 7.0 | 4.7 | 31.0 | 86.4 |
| 575 | 14QM052  | 30.7 | 85.1 | 29.6 | 6.9 | 4.5 | 31.1 | 85.8 |
| 576 | 14QM053  | 33.1 | 85.3 | 32.0 | 7.1 | 3.7 | 33.1 | 85.8 |
| 577 | 14QM053H | 30.3 | 84.5 | 30.0 | 6.9 | 4.2 | 31.6 | 85.6 |
| 578 | P♂       | 30.4 | 85.4 | 29.1 | 6.9 | 4.6 | 28.4 | 83.5 |
| 579 | 14QM054H | 30.1 | 86.7 | 28.8 | 6.9 | 4.7 | 30.0 | 86.2 |
| 580 | 14QM054  | 29.7 | 84.7 | 29.0 | 7.0 | 4.9 | 28.2 | 85.4 |
| 581 | 14QM055  | 29.8 | 86.4 | 30.6 | 6.9 | 5.4 | 28.5 | 86.8 |
| 582 | 14QM055H | 30.9 | 86.4 | 29.8 | 7.0 | 5.1 | 29.1 | 86.9 |
| 583 | P♂       | 31.0 | 85.2 | 29.8 | 7.0 | 4.5 | 28.4 | 83.5 |
| 584 | 14QM056H | 32.7 | 85.4 | 34.1 | 7.1 | 4.4 | 30.9 | 85.6 |
| 585 | 14QM056  | 32.5 | 84.9 | 31.6 | 7.0 | 4.6 | 31.1 | 85.0 |
| 586 | 14QM057  | 30.0 | 86.8 | 30.8 | 7.0 | 3.5 | 27.8 | 84.8 |
| 587 | 14QM057H | 29.3 | 83.7 | 27.4 | 6.8 | 4.4 | 29.5 | 86.5 |
| 588 | P♂       | 30.7 | 86.3 | 29.5 | 6.9 | 4.8 | 28.4 | 83.5 |
| 589 | 14QM058H | 29.8 | 85.1 | 29.8 | 6.9 | 5.1 | 30.2 | 86.1 |
| 590 | 14QM058  | 31.3 | 86.3 | 30.8 | 7.0 | 4.9 | 31.5 | 83.2 |
| 591 | 14QM059  | 30.4 | 80.4 | 30.1 | 7.0 | 4.9 | 31.3 | 85.6 |
| 592 | 14QM059H | 29.7 | 86.4 | 29.5 | 7.0 | 4.8 | 28.4 | 85.8 |
| 593 | P♂       | 30.1 | 85.9 | 28.5 | 6.9 | 4.6 | 28.4 | 83.5 |
| 594 | 14QM060H | 32.1 | 85.7 | 31.9 | 7.1 | 4.7 | 30.3 | 86.6 |
| 595 | 14QM060  | 32.1 | 85.7 | 30.5 | 7.0 | 4.9 | 30.8 | 84.5 |
| 596 | 14QM061  | 29.6 | 84.7 | 29.5 | 6.9 | 4.4 | 30.4 | 84.7 |

|     |          |      |      |      |     |     |      |      |
|-----|----------|------|------|------|-----|-----|------|------|
| 597 | 14QM061H | 30.4 | 85.7 | 30.6 | 7.1 | 4.9 | 29.9 | 84.9 |
| 598 | P♂       | 30.0 | 85.5 | 29.3 | 6.9 | 4.2 | 28.4 | 83.5 |
| 599 | 14QM062H | 31.1 | 84.5 | 31.2 | 7.0 | 4.2 | 31.2 | 87.3 |
| 600 | 14QM062  | 33.2 | 86.8 | 33.0 | 7.2 | 4.2 | 31.0 | 84.9 |
| 601 | 14QM063  | 28.7 | 85.0 | 30.1 | 6.9 | 4.5 | 29.2 | 86.2 |
| 602 | 14QM063H | 30.9 | 85.6 | 31.5 | 7.0 | 4.5 | 30.2 | 85.6 |
| 603 | 14QM380  | 30.1 | 84.9 | 31.8 | 7.0 | 4.5 | 31.0 | 86.2 |
| 604 | 14QM064H | 31.3 | 86.3 | 29.3 | 6.9 | 5.0 | 30.1 | 86.9 |
| 605 | 14QM064  | 31.3 | 85.4 | 31.0 | 7.0 | 5.1 | 30.6 | 87.2 |
| 606 | 14QM065  | 31.8 | 85.7 | 31.1 | 7.1 | 5.0 | 30.0 | 85.8 |
| 607 | 14QM065H | 30.7 | 85.7 | 30.2 | 6.9 | 4.3 | 30.1 | 86.2 |
| 608 | P♂       | 30.6 | 86.8 | 29.6 | 7.0 | 4.6 | 31.0 | 86.2 |
| 609 | 14QM066H | 31.7 | 87.1 | 31.0 | 7.1 | 4.8 | 31.6 | 85.3 |
| 610 | 14QM066  | 31.7 | 85.3 | 31.2 | 7.0 | 4.5 | 31.3 | 85.5 |
| 611 | 14QM067  | 30.5 | 86.0 | 29.8 | 6.9 | 4.4 | 30.7 | 86.2 |
| 612 | 14QM067H | 30.8 | 86.2 | 30.2 | 7.0 | 4.4 | 29.7 | 86.8 |
| 613 | P♂       | 30.7 | 86.0 | 28.9 | 6.9 | 5.2 | 31.0 | 86.2 |
| 614 | 14QM068H | 31.2 | 85.9 | 32.3 | 7.1 | 4.8 | 30.1 | 86.3 |
| 615 | 14QM068  | 30.1 | 87.6 | 29.0 | 7.0 | 5.2 | 30.2 | 86.6 |
| 616 | 14QM069  | 29.4 | 85.4 | 29.1 | 6.9 | 5.1 | 27.3 | 86.7 |
| 617 | 14QM069H | 30.5 | 87.8 | 29.9 | 7.0 | 5.0 | 29.5 | 86.0 |
| 618 | P♂       | 29.9 | 87.0 | 29.9 | 7.0 | 4.6 | 31.0 | 86.2 |
| 619 | 14QM070H | 31.6 | 86.4 | 31.7 | 6.9 | 4.6 | 31.6 | 85.9 |
| 620 | 14QM070  | 31.1 | 86.9 | 30.8 | 7.0 | 4.7 | 32.0 | 86.6 |
| 621 | 14QM071  | 31.1 | 85.8 | 29.8 | 6.9 | 4.5 | 30.0 | 84.8 |
| 622 | 14QM071H | 31.0 | 87.7 | 32.0 | 7.0 | 4.3 | 30.0 | 85.1 |
| 623 | P♂       | 29.4 | 85.3 | 29.4 | 6.9 | 4.5 | 31.0 | 86.2 |
| 624 | 14QM072H | 30.5 | 86.1 | 29.4 | 6.9 | 4.8 | 30.2 | 86.8 |
| 625 | 14QM072  | 29.6 | 85.9 | 28.6 | 6.8 | 5.0 | 29.8 | 85.7 |
| 626 | 14QM073  | 31.1 | 87.1 | 31.6 | 6.9 | 4.5 | 30.6 | 86.0 |
| 627 | 14QM073H | 31.6 | 86.7 | 30.2 | 6.9 | 4.6 | 29.7 | 86.5 |
| 628 | P♂       | 31.3 | 85.9 | 28.7 | 7.0 | 4.5 | 31.0 | 86.2 |
| 629 | 14QM074H | 31.3 | 84.5 | 32.2 | 7.0 | 5.0 | 30.5 | 86.2 |
| 630 | 14QM074  | 30.9 | 86.8 | 31.2 | 6.9 | 4.5 | 30.6 | 85.0 |
| 631 | 14QM075  | 30.4 | 85.3 | 29.9 | 6.9 | 4.0 | 31.8 | 85.5 |
| 632 | 14QM075H | 31.5 | 87.2 | 30.0 | 7.0 | 4.3 | 29.9 | 86.0 |
| 633 | P♂       | 31.6 | 85.7 | 30.2 | 7.0 | 5.2 | 31.0 | 86.2 |
| 634 | 14QM076H | 31.6 | 87.1 | 31.7 | 7.2 | 5.1 | 29.0 | 84.2 |
| 635 | 14QM076  | 30.5 | 85.0 | 27.6 | 7.0 | 5.5 | 30.8 | 86.1 |
| 636 | 14QM077  | 29.1 | 87.0 | 29.2 | 7.0 | 5.3 | 28.9 | 87.1 |
| 637 | 14QM077H | 29.6 | 87.1 | 28.1 | 6.8 | 4.8 | 30.5 | 86.1 |
| 638 | P♂       | 31.3 | 88.2 | 31.4 | 7.0 | 4.8 | 31.0 | 86.2 |
| 639 | 14QM078H | 30.5 | 85.9 | 28.1 | 7.0 | 5.3 | 31.0 | 85.2 |
| 640 | 14QM078  | 29.2 | 84.5 | 26.7 | 6.9 | 5.0 | 29.1 | 85.5 |
| 641 | 14QM079  | 30.3 | 86.3 | 31.5 | 6.9 | 5.1 | 30.9 | 86.3 |
| 642 | 14QM079H | 31.8 | 85.7 | 30.8 | 6.9 | 5.0 | 31.2 | 85.2 |
| 643 | P♂       | 30.1 | 87.0 | 28.5 | 6.9 | 5.3 | 31.0 | 86.2 |
| 644 | 14QM080H | 30.3 | 86.3 | 30.5 | 7.0 | 4.6 | 30.0 | 87.5 |
| 645 | 14QM080  | 30.4 | 86.7 | 28.6 | 6.9 | 4.9 | 29.2 | 85.8 |
| 646 | 14QM081  | 30.0 | 84.7 | 29.7 | 6.9 | 4.6 | 30.1 | 86.5 |



|     |          |      |      |      |     |     |      |      |
|-----|----------|------|------|------|-----|-----|------|------|
| 647 | 14QM081H | 31.1 | 86.2 | 31.6 | 7.0 | 4.2 | 30.6 | 86.2 |
| 648 | P♂       | 29.7 | 83.6 | 29.1 | 6.9 | 4.7 | 31.0 | 86.2 |
| 649 | 14QM082H | 30.8 | 86.7 | 31.0 | 6.9 | 4.3 | 31.3 | 86.0 |
| 650 | 14QM082  | 32.6 | 86.1 | 34.1 | 7.1 | 4.5 | 31.3 | 84.6 |
| 651 | 14QM083  | 32.1 | 87.8 | 29.6 | 7.0 | 4.8 | 30.4 | 86.1 |
| 652 | 14QM083H | 31.5 | 86.3 | 31.0 | 7.0 | 4.7 | 30.2 | 87.2 |
| 653 | 14QM380  | 30.9 | 86.3 | 29.5 | 7.0 | 4.9 | 30.5 | 86.8 |
| 654 | 14QM084H | 30.6 | 87.5 | 29.2 | 6.9 | 5.3 | 31.2 | 86.5 |
| 655 | 14QM084  | 31.4 | 87.4 | 29.1 | 7.0 | 5.0 | 29.9 | 87.7 |
| 656 | 14QM085  | 31.7 | 87.6 | 31.8 | 7.1 | 4.9 | 31.1 | 86.4 |
| 657 | 14QM085H | 31.5 | 86.8 | 29.8 | 7.0 | 4.7 | 29.5 | 85.1 |
| 658 | P♂       | 30.3 | 87.4 | 27.4 | 6.9 | 5.3 | 30.5 | 86.8 |
| 659 | 14QM086H | 30.8 | 86.7 | 29.1 | 7.0 | 5.1 | 31.0 | 86.0 |
| 660 | 14QM086  | 29.6 | 89.1 | 30.6 | 7.1 | 5.5 | 29.0 | 86.9 |
| 661 | 14QM087  | 31.7 | 86.5 | 31.8 | 7.0 | 5.0 | 31.0 | 86.5 |
| 662 | 14QM087H | 31.8 | 86.5 | 30.7 | 7.1 | 5.4 | 29.7 | 87.3 |
| 663 | P♂       | 31.2 | 87.9 | 29.7 | 6.9 | 4.9 | 30.5 | 86.8 |
| 664 | 14QM088H | 30.9 | 86.6 | 28.8 | 6.9 | 5.0 | 29.9 | 86.5 |
| 665 | 14QM088  | 31.3 | 86.9 | 33.1 | 6.9 | 3.8 | 29.0 | 84.2 |
| 666 | 14QM089  | 31.0 | 86.6 | 30.0 | 7.0 | 5.2 | 29.6 | 86.4 |
| 667 | 14QM089H | 31.4 | 86.0 | 29.4 | 7.0 | 4.8 | 30.5 | 85.8 |
| 668 | P♂       | 30.0 | 86.2 | 28.6 | 6.9 | 4.9 | 30.5 | 86.8 |
| 669 | 14QM090H | 33.0 | 85.8 | 30.6 | 7.0 | 4.5 | 32.6 | 84.9 |
| 670 | 14QM090  | 33.1 | 87.3 | 33.4 | 7.0 | 4.7 | 33.2 | 86.5 |
| 671 | 14QM091  | 30.3 | 86.4 | 29.8 | 7.0 | 4.8 | 28.0 | 84.0 |
| 672 | 14QM091H | 31.6 | 88.0 | 31.7 | 7.1 | 4.4 | 30.3 | 84.2 |
| 673 | P♂       | 29.7 | 87.0 | 29.4 | 7.0 | 4.4 | 30.5 | 86.8 |
| 674 | P♂       | 31.0 | 84.6 | 30.5 | 6.9 | 4.2 | 30.3 | 86.5 |
| 675 | F1       | 29.9 | 87.6 | 29.1 | 6.9 | 4.7 | 31.0 | 85.8 |
| 676 | P♀       | 30.2 | 86.1 | 29.6 | 6.9 | 5.1 | 29.0 | 84.0 |
| 677 | P♂       | 30.2 | 88.4 | 29.0 | 6.9 | 4.8 | 30.5 | 86.8 |
| 678 | 14QM092H | 31.5 | 85.6 | 30.7 | 7.0 | 4.9 | 31.6 | 85.7 |
| 679 | 14QM092  | 31.9 | 85.9 | 31.3 | 7.0 | 4.0 | 32.2 | 86.7 |
| 680 | 14QM093  | 31.2 | 86.2 | 29.5 | 7.0 | 4.8 | 30.5 | 85.7 |
| 681 | 14QM093H | 31.9 | 85.3 | 30.8 | 7.0 | 4.9 | 30.0 | 85.2 |
| 682 | P♂       | 29.7 | 85.4 | 29.0 | 6.9 | 4.7 | 30.5 | 86.8 |
| 683 | 14QM094H | 31.1 | 85.9 | 29.4 | 6.9 | 4.8 | 30.0 | 87.0 |
| 684 | 14QM094  | 29.3 | 85.1 | 29.2 | 6.9 | 4.9 | 29.4 | 86.3 |
| 685 | 14QM095  | 30.8 | 87.2 | 33.8 | 7.1 | 4.5 | 29.7 | 86.4 |
| 686 | 14QM095H | 29.7 | 87.3 | 28.8 | 6.9 | 4.6 | 28.9 | 86.4 |
| 687 | P♂       | 30.4 | 86.5 | 29.1 | 6.9 | 4.5 | 30.5 | 86.8 |
| 688 | 14QM096H | 32.1 | 87.1 | 30.9 | 7.1 | 4.7 | 30.9 | 85.2 |
| 689 | 14QM096  | 32.7 | 86.2 | 32.1 | 7.1 | 4.7 | 31.1 | 86.5 |
| 690 | 14QM097  | 30.0 | 84.5 | 29.5 | 7.0 | 4.5 | 28.9 | 86.0 |
| 691 | 14QM097H | 31.1 | 86.1 | 31.1 | 7.0 | 4.4 | 29.5 | 85.9 |
| 692 | P♂       | 30.4 | 86.2 | 30.9 | 6.9 | 4.7 | 30.5 | 86.8 |
| 693 | 14QM098H | 31.6 | 86.3 | 29.3 | 7.0 | 4.1 | 29.7 | 86.5 |
| 694 | 14QM098  | 30.6 | 86.5 | 28.6 | 6.9 | 4.8 | 28.6 | 85.5 |
| 695 | 14QM099  | 30.9 | 86.1 | 31.8 | 6.9 | 4.2 | 29.5 | 84.9 |
| 696 | 14QM099H | 30.8 | 84.0 | 30.9 | 7.0 | 4.5 | 28.3 | 85.5 |



|     |          |      |      |      |     |     |      |      |
|-----|----------|------|------|------|-----|-----|------|------|
| 697 | P♂       | 31.7 | 85.3 | 29.8 | 7.0 | 4.4 | 30.5 | 86.8 |
| 698 | 14QM100H | 31.6 | 88.1 | 31.0 | 7.1 | 4.8 | 29.7 | 85.9 |
| 699 | 14QM100  | 29.4 | 84.8 | 27.4 | 6.8 | 4.7 | 29.2 | 85.3 |
| 700 | 14QM101  | 29.6 | 86.6 | 29.6 | 6.9 | 4.6 | 29.9 | 86.7 |
| 701 | 14QM101H | 30.6 | 87.1 | 29.0 | 6.9 | 4.8 | 29.7 | 87.9 |
| 702 | 14QM380  | 31.4 | 85.3 | 31.9 | 7.0 | 4.5 | 29.2 | 86.9 |
| 703 | 14QM102H | 31.3 | 85.8 | 30.8 | 7.1 | 5.0 | 31.4 | 86.0 |
| 704 | 14QM102  | 32.5 | 84.9 | 31.3 | 7.0 | 4.6 | 30.6 | 84.6 |
| 705 | 14QM103  | 32.9 | 85.2 | 33.2 | 7.2 | 4.4 | 32.6 | 86.6 |
| 706 | 14QM103H | 31.5 | 84.4 | 30.9 | 7.0 | 4.8 | 31.7 | 85.1 |
| 707 | P♂       | 29.7 | 85.4 | 28.0 | 6.9 | 4.4 | 29.2 | 86.9 |
| 708 | 14QM104H | 31.4 | 86.9 | 29.9 | 7.1 | 4.7 | 30.6 | 86.0 |
| 709 | 14QM104  | 31.2 | 86.7 | 31.0 | 7.1 | 4.8 | 31.1 | 84.9 |
| 710 | 14QM105  | 31.6 | 84.4 | 31.2 | 7.1 | 4.7 | 31.4 | 84.7 |
| 711 | 14QM105H | 31.6 | 86.6 | 29.8 | 7.0 | 4.7 | 29.5 | 86.7 |
| 712 | P♂       | 31.1 | 84.7 | 30.9 | 7.0 | 4.3 | 29.2 | 86.9 |
| 713 | 14QM106H | -    | -    | -    | -   | -   | 31.1 | 86.6 |
| 714 | 14QM106  | 32.5 | 85.5 | 30.4 | 7.1 | 4.6 | 30.7 | 86.0 |
| 715 | 14QM107  | 30.9 | 85.7 | 31.6 | 7.0 | 5.0 | 28.9 | 82.7 |
| 716 | 14QM107H | 31.2 | 86.2 | 30.8 | 7.0 | 5.2 | 30.8 | 86.2 |
| 717 | P♂       | 29.7 | 85.9 | 28.5 | 7.0 | 5.1 | 29.2 | 86.9 |
| 718 | 14QM108H | 30.5 | 86.4 | 28.9 | 7.0 | 5.3 | 30.0 | 84.3 |
| 719 | 14QM108  | 32.0 | 85.8 | 28.5 | 7.0 | 5.0 | 30.6 | 84.9 |
| 720 | 14QM109  | 29.5 | 85.9 | 28.2 | 6.9 | 4.7 | 30.7 | 85.5 |
| 721 | 14QM109H | 30.1 | 84.3 | 28.8 | 6.8 | 4.1 | 29.4 | 86.9 |
| 722 | P♂       | 29.0 | 85.6 | 27.7 | 6.9 | 5.1 | 29.2 | 86.9 |
| 723 | 14QM110H | 30.9 | 86.6 | 31.4 | 6.9 | 4.7 | 30.0 | 85.9 |
| 724 | 14QM110  | 30.2 | 86.8 | 30.9 | 7.0 | 5.2 | 30.1 | 85.8 |
| 725 | 14QM111  | 31.5 | 86.4 | 32.2 | 7.0 | 4.0 | 30.6 | 86.4 |
| 726 | 14QM111H | 32.0 | 86.3 | 30.4 | 7.0 | 4.9 | 31.1 | 85.8 |
| 727 | P♂       | 31.4 | 85.9 | 32.2 | 7.0 | 4.0 | 29.2 | 86.9 |
| 728 | 14QM112H | 30.6 | 87.3 | 31.2 | 7.0 | 4.8 | 31.4 | 85.9 |
| 729 | 14QM112  | 29.6 | 86.2 | 27.9 | 6.9 | 5.0 | 30.8 | 85.7 |
| 730 | 14QM113  | -    | -    | -    | -   | -   | 31.1 | 85.5 |
| 731 | 14QM113H | 32.1 | 86.7 | 30.0 | 7.0 | 5.3 | 31.6 | 85.5 |
| 732 | P♂       | 30.5 | 87.0 | 28.6 | 6.9 | 4.6 | 29.2 | 86.9 |
| 733 | 14QM114H | 32.6 | 86.4 | 29.7 | 7.0 | 5.2 | 29.7 | 85.6 |
| 734 | 14QM114  | 31.5 | 86.9 | 30.5 | 7.0 | 5.0 | 31.2 | 86.6 |
| 735 | 14QM115  | 31.9 | 87.0 | 33.0 | 7.0 | 4.2 | 31.4 | 84.4 |
| 736 | 14QM115H | 30.6 | 84.7 | 30.1 | 7.0 | 5.3 | 31.9 | 86.2 |
| 737 | P♂       | 29.9 | 86.6 | 27.6 | 6.9 | 4.6 | 29.2 | 86.9 |
| 738 | 14QM116H | 30.2 | 85.4 | 29.4 | 7.0 | 4.9 | 30.3 | 85.3 |
| 739 | 14QM116  | 30.7 | 86.1 | 29.5 | 6.9 | 4.9 | 28.6 | 85.7 |
| 740 | 14QM117  | 31.8 | 85.9 | 30.4 | 7.0 | 4.9 | 31.3 | 85.3 |
| 741 | 14QM117H | 31.9 | 84.6 | 31.6 | 7.0 | 4.4 | 31.1 | 82.3 |
| 742 | P♂       | 29.8 | 86.1 | 27.9 | 6.8 | 4.6 | 29.2 | 86.9 |
| 743 | 14QM118H | 31.3 | 87.1 | 31.7 | 7.1 | 4.6 | 32.4 | 85.3 |
| 744 | 14QM118  | 31.7 | 84.9 | 30.8 | 7.0 | 4.9 | 30.5 | 86.4 |
| 745 | 14QM119  | 32.4 | 85.0 | 32.3 | 7.0 | 4.5 | 31.3 | 84.7 |
| 746 | 14QM119H | 31.5 | 86.2 | 30.6 | 7.0 | 4.8 | 31.3 | 86.5 |

|     |          |      |      |      |     |     |      |      |
|-----|----------|------|------|------|-----|-----|------|------|
| 747 | P♂       | 30.4 | 86.1 | 28.6 | 6.9 | 5.0 | 29.2 | 86.9 |
| 748 | 14QM120H | 31.0 | 85.5 | 32.3 | 7.0 | 4.5 | 30.4 | 86.6 |
| 749 | 14QM120  | 30.3 | 85.8 | 30.7 | 6.9 | 4.1 | 29.9 | 87.0 |
| 750 | 14QM121  | 31.3 | 85.3 | 30.9 | 7.0 | 5.0 | 30.6 | 86.2 |
| 751 | 14QM121H | 32.1 | 86.8 | 30.6 | 7.0 | 5.2 | 30.5 | 86.5 |
| 752 | 14QM380  | 30.2 | 86.2 | 28.9 | 6.9 | 4.9 | 30.1 | 85.2 |
| 753 | 14QM122H | 32.1 | 86.0 | 30.8 | 7.0 | 5.2 | 30.5 | 86.0 |
| 754 | 14QM122  | 32.2 | 86.7 | 31.2 | 7.2 | 5.3 | 31.3 | 85.5 |
| 755 | 14QM123  | 31.8 | 86.8 | 31.7 | 6.9 | 4.5 | 29.3 | 86.3 |
| 756 | 14QM123H | 31.2 | 85.8 | 28.8 | 7.0 | 5.4 | 30.2 | 86.5 |
| 757 | P♂       | 30.1 | 85.2 | 28.7 | 6.9 | 5.7 | 30.1 | 85.2 |
| 758 | 14QM124H | 30.8 | 86.1 | 29.3 | 6.9 | 5.3 | 29.9 | 85.7 |
| 759 | 14QM124  | 29.8 | 83.7 | 29.5 | 7.0 | 5.4 | 30.3 | 84.1 |
| 760 | 14QM125  | 29.8 | 86.4 | 28.2 | 6.9 | 5.3 | 28.6 | 82.9 |
| 761 | 14QM125H | 29.4 | 85.9 | 29.1 | 6.9 | 5.1 | 29.9 | 87.0 |
| 762 | P♂       | 29.3 | 86.4 | 28.1 | 6.9 | 5.1 | 30.1 | 85.2 |
| 763 | 14QM126H | 29.2 | 84.3 | 28.9 | 7.0 | 5.3 | 29.3 | 86.3 |
| 764 | 14QM126  | 30.4 | 87.0 | 30.7 | 7.2 | 5.9 | 29.7 | 86.5 |
| 765 | 14QM127  | 30.4 | 85.4 | 31.9 | 6.9 | 4.2 | 29.9 | 84.3 |
| 766 | 14QM127H | 31.0 | 86.5 | 30.6 | 6.9 | 4.7 | 30.2 | 85.7 |
| 767 | P♂       | 30.6 | 86.8 | 29.0 | 7.0 | 5.0 | 30.1 | 85.2 |
| 768 | 14QM128H | 31.7 | 87.1 | 30.2 | 7.0 | 4.9 | 31.1 | 86.3 |
| 769 | 14QM128  | 31.4 | 85.9 | 29.8 | 7.0 | 4.5 | 31.9 | 85.3 |
| 770 | 14QM129  | 31.7 | 86.7 | 29.7 | 7.0 | 5.3 | 31.1 | 84.9 |
| 771 | 14QM129H | 32.2 | 86.2 | 31.5 | 7.0 | 4.8 | 29.7 | 87.6 |
| 772 | P♂       | 30.8 | 86.4 | 30.2 | 7.0 | 4.7 | 30.1 | 85.2 |
| 773 | 14QM130H | 31.6 | 86.7 | 30.2 | 7.0 | 5.1 | 31.8 | 85.2 |
| 774 | 14QM130  | 33.2 | 86.1 | 32.8 | 7.2 | 4.0 | 31.4 | 84.5 |
| 775 | 14QM131  | 32.7 | 86.9 | 32.5 | 7.2 | 4.6 | 31.2 | 86.0 |
| 776 | 14QM131H | 32.0 | 86.6 | 29.9 | 7.0 | 4.9 | 32.5 | 85.8 |
| 777 | P♂       | 30.5 | 86.6 | 29.0 | 6.9 | 5.1 | 30.1 | 85.2 |
| 778 | 14QM132H | 30.3 | 86.0 | 29.4 | 7.0 | 5.3 | 30.0 | 86.6 |
| 779 | 14QM132  | 29.4 | 85.0 | 28.8 | 6.8 | 4.5 | 29.6 | 85.1 |
| 780 | 14QM133  | 32.0 | 87.2 | 31.9 | 7.1 | 5.0 | 32.1 | 86.4 |
| 781 | 14QM133H | 32.5 | 87.0 | 31.3 | 7.1 | 5.2 | 31.2 | 83.2 |
| 782 | P♂       | 30.7 | 85.5 | 29.3 | 6.9 | 4.9 | 30.1 | 85.2 |
| 783 | 14QM134H | 29.9 | 85.9 | 28.6 | 6.9 | 4.7 | 29.9 | 87.1 |
| 784 | 14QM134  | -    | -    | -    | -   | -   | 28.9 | 86.8 |
| 785 | 14QM135  | 32.1 | 85.2 | 33.1 | 7.1 | 4.6 | 30.3 | 84.7 |
| 786 | 14QM135H | 30.6 | 85.8 | 29.5 | 7.0 | 4.6 | 31.1 | 84.7 |
| 787 | P♂       | 30.7 | 85.6 | 29.9 | 7.1 | 4.7 | 30.1 | 85.2 |
| 788 | 14QM136H | 31.3 | 84.7 | 31.0 | 7.0 | 4.8 | 31.3 | 85.0 |
| 789 | 14QM136  | -    | -    | -    | -   | -   | 32.8 | 85.1 |
| 790 | 14QM137  | 30.5 | 84.5 | 29.5 | 6.8 | 4.6 | 32.2 | 84.1 |
| 791 | 14QM137H | 31.7 | 85.3 | 33.0 | 7.1 | 4.6 | 31.4 | 85.8 |
| 792 | P♂       | 31.4 | 85.4 | 30.1 | 7.0 | 4.5 | 30.1 | 85.2 |
| 793 | 14QM138H | 31.9 | 85.9 | 31.0 | 7.0 | 4.7 | 30.0 | 85.6 |
| 794 | 14QM138  | 30.6 | 85.2 | 29.8 | 6.9 | 4.1 | 29.3 | 84.6 |
| 795 | 14QM139  | 29.6 | 85.6 | 28.4 | 6.9 | 4.7 | 30.4 | 86.0 |
| 796 | 14QM139H | 30.7 | 85.7 | 30.4 | 7.0 | 4.5 | 30.6 | 85.7 |

|     |          |      |      |      |     |     |      |      |
|-----|----------|------|------|------|-----|-----|------|------|
| 797 | P♂       | 29.5 | 85.2 | 28.4 | 6.8 | 4.7 | 30.1 | 85.2 |
| 798 | 14QM140H | -    | -    | -    | -   | -   | 31.9 | 86.2 |
| 799 | 14QM140  | 32.4 | 86.3 | 31.8 | 7.0 | 4.5 | 31.0 | 86.2 |
| 800 | 14QM141  | 31.3 | 87.5 | 32.1 | 7.1 | 4.9 | 30.5 | 86.5 |
| 801 | 14QM141H | 31.5 | 86.2 | 31.1 | 7.0 | 4.6 | 30.9 | 86.1 |
| 802 | 14QM380  | 30.4 | 87.3 | 30.3 | 7.0 | 4.8 | 29.9 | 85.0 |
| 803 | 14QM142H | 31.0 | 87.7 | 31.3 | 7.0 | 4.5 | 28.0 | 84.2 |
| 804 | 14QM142  | 30.8 | 86.7 | 31.9 | 7.1 | 4.5 | 31.1 | 85.2 |
| 805 | 14QM143  | 31.1 | 86.6 | 32.8 | 7.0 | 5.0 | 30.4 | 87.1 |
| 806 | 14QM143H | 30.8 | 85.1 | 30.9 | 6.9 | 4.5 | 29.8 | 87.0 |
| 807 | P♂       | 30.7 | 86.5 | 31.6 | 7.0 | 4.5 | 29.9 | 85.0 |
| 808 | 14QM144H | 31.0 | 87.1 | 32.1 | 7.0 | 4.9 | 31.0 | 86.0 |
| 809 | 14QM144  | 31.4 | 86.4 | 32.1 | 7.0 | 5.1 | 30.0 | 86.3 |
| 810 | 14QM145  | 29.8 | 86.3 | 29.1 | 6.8 | 4.4 | 31.7 | 86.4 |
| 811 | 14QM145H | 30.6 | 86.6 | 30.4 | 7.0 | 4.4 | 30.2 | 86.0 |
| 812 | P♂       | 30.5 | 85.6 | 32.5 | 7.0 | 4.7 | 29.9 | 85.0 |
| 813 | 14QM146H | 29.3 | 86.2 | 29.6 | 6.9 | 4.8 | 29.1 | 87.4 |
| 814 | 14QM146  | 30.6 | 86.9 | 32.3 | 7.0 | 4.1 | 31.5 | 86.2 |
| 815 | 14QM147  | 32.4 | 86.3 | 31.3 | 7.2 | 4.3 | 32.7 | 84.2 |
| 816 | 14QM147H | 32.4 | 87.4 | 29.5 | 7.1 | 4.6 | 29.2 | 84.2 |
| 817 | P♂       | 29.6 | 86.6 | 28.2 | 6.9 | 4.7 | 29.9 | 85.0 |
| 818 | 14QM148H | 31.5 | 84.6 | 32.0 | 7.1 | 4.9 | 31.0 | 85.8 |
| 819 | 14QM148  | 31.9 | 86.7 | 33.1 | 7.1 | 4.3 | 32.0 | 86.5 |
| 820 | 14QM149  | 30.5 | 85.4 | 31.6 | 6.9 | 4.2 | 32.2 | 85.4 |
| 821 | 14QM149H | 31.7 | 85.6 | 30.0 | 7.0 | 4.9 | 32.3 | 85.8 |
| 822 | P♂       | 30.3 | 86.4 | 30.6 | 7.0 | 4.1 | 29.9 | 85.0 |
| 823 | 14QM150H | 30.2 | 87.6 | 30.3 | 7.0 | 4.3 | 31.3 | 85.5 |
| 824 | 14QM150  | 31.7 | 87.6 | 31.5 | 7.0 | 4.4 | 31.5 | 86.1 |
| 825 | 14QM151  | 30.3 | 85.3 | 29.3 | 6.9 | 4.6 | 29.9 | 87.1 |
| 826 | 14QM151H | 31.2 | 85.8 | 31.0 | 7.0 | 4.1 | 31.3 | 85.7 |
| 827 | P♂       | 29.6 | 85.8 | 28.3 | 7.0 | 4.6 | 29.9 | 85.0 |
| 828 | 14QM152H | 29.8 | 84.9 | 29.3 | 6.9 | 4.9 | 29.8 | 85.8 |
| 829 | 14QM152  | 30.1 | 85.4 | 30.8 | 6.9 | 4.9 | 29.6 | 86.8 |
| 830 | 14QM153  | 29.5 | 86.0 | 30.4 | 6.9 | 5.3 | 29.2 | 87.5 |
| 831 | 14QM153H | 30.8 | 87.2 | 30.3 | 7.0 | 4.8 | 31.5 | 86.4 |
| 832 | P♂       | 29.6 | 87.5 | 29.3 | 6.9 | 5.3 | 29.9 | 85.0 |
| 833 | 14QM154H | 30.4 | 84.7 | 31.5 | 6.9 | 4.7 | 30.3 | 86.1 |
| 834 | 14QM154  | 32.1 | 87.2 | 32.6 | 7.0 | 4.7 | 31.7 | 86.1 |
| 835 | 14QM155  | 31.0 | 84.8 | 32.7 | 7.0 | 4.9 | 30.4 | 86.0 |
| 836 | 14QM155H | 31.5 | 86.0 | 30.5 | 7.1 | 5.0 | 31.2 | 86.8 |
| 837 | P♂       | 30.7 | 86.5 | 31.2 | 6.9 | 4.4 | 29.9 | 85.0 |
| 838 | 14QM156H | 31.4 | 86.8 | 30.6 | 7.1 | 4.9 | 30.7 | 86.1 |
| 839 | 14QM156  | 30.1 | 87.1 | 30.8 | 7.1 | 5.1 | 30.0 | 85.2 |
| 840 | 14QM157  | 30.7 | 85.6 | 31.7 | 7.2 | 4.9 | 31.6 | 86.2 |
| 841 | 14QM157H | 31.3 | 87.8 | 32.3 | 7.1 | 4.4 | 30.0 | 86.6 |
| 842 | P♂       | 30.7 | 86.3 | 31.9 | 7.0 | 4.6 | 29.9 | 85.0 |
| 843 | 14QM158H | 28.7 | 86.5 | 27.1 | 6.8 | 5.4 | 27.8 | 85.7 |
| 844 | 14QM158  | 28.2 | 84.2 | 26.6 | 6.8 | 4.8 | 28.3 | 85.9 |
| 845 | 14QM159  | 32.2 | 86.1 | 30.5 | 7.0 | 4.2 | 31.9 | 86.3 |
| 846 | 14QM159H | 33.2 | 87.3 | 31.2 | 7.2 | 4.7 | 30.9 | 86.8 |

|     |          |      |      |      |     |     |      |      |
|-----|----------|------|------|------|-----|-----|------|------|
| 847 | P♂       | 30.4 | 86.7 | 30.0 | 6.9 | 4.4 | 29.9 | 85.0 |
| 848 | 14QM160H | 29.9 | 84.3 | 32.2 | 7.0 | 5.0 | 29.1 | 86.1 |
| 849 | 14QM160  | 31.6 | 86.7 | 31.7 | 7.1 | 4.7 | 30.5 | 85.2 |
| 850 | 14QM161  | 30.8 | 86.0 | 31.3 | 7.0 | 4.8 | 30.5 | 85.9 |
| 851 | 14QM161H | 30.7 | 85.8 | 30.7 | 6.9 | 4.2 | 31.0 | 85.4 |
| 852 | 14QM380  | 29.5 | 84.7 | 30.5 | 6.9 | 3.9 | 29.3 | 85.5 |
| 853 | 14QM162H | 30.5 | 87.0 | 30.3 | 7.0 | 5.2 | 31.1 | 85.8 |
| 854 | 14QM162  | 29.2 | 87.2 | 31.8 | 7.1 | 5.4 | 30.1 | 84.6 |
| 855 | 14QM163  | 32.2 | 87.2 | 32.6 | 7.2 | 4.7 | 31.4 | 85.7 |
| 856 | 14QM163H | 31.6 | 87.0 | 32.3 | 7.0 | 4.5 | 31.1 | 85.2 |
| 857 | P♂       | 30.4 | 87.5 | 30.8 | 7.0 | 4.4 | 29.3 | 85.5 |
| 858 | 14QM164H | 31.2 | 86.7 | 32.9 | 7.2 | 5.1 | 29.7 | 87.9 |
| 859 | 14QM164  | 29.4 | 84.9 | 29.5 | 6.9 | 5.2 | 28.7 | 86.3 |
| 860 | 14QM165  | 29.8 | 87.3 | 32.8 | 6.9 | 4.3 | 31.4 | 84.0 |
| 861 | 14QM165H | 32.1 | 87.0 | 32.5 | 7.0 | 4.5 | 32.2 | 85.3 |
| 862 | P♂       | 30.2 | 85.9 | 30.3 | 6.9 | 4.6 | 29.3 | 85.5 |
| 863 | 14QM166H | 32.5 | 88.1 | 31.9 | 7.1 | 4.6 | 31.3 | 85.2 |
| 864 | 14QM166  | 32.5 | 86.9 | 34.0 | 7.0 | 4.2 | 31.1 | 85.0 |
| 865 | 14QM167  | 31.8 | 86.8 | 32.0 | 7.0 | 4.6 | 31.2 | 84.3 |
| 866 | 14QM167H | 31.5 | 87.0 | 31.4 | 7.1 | 4.6 | 29.9 | 85.3 |
| 867 | P♂       | 30.1 | 87.3 | 30.2 | 6.9 | 5.1 | 29.3 | 85.5 |
| 868 | 14QM168H | 31.3 | 86.3 | 32.7 | 7.0 | 4.5 | 30.8 | 85.7 |
| 869 | 14QM168  | 29.2 | 85.2 | 29.3 | 6.8 | 5.0 | 28.7 | 86.1 |
| 870 | 14QM169  | 28.9 | 85.2 | 26.9 | 6.8 | 4.9 | 28.0 | 85.0 |
| 871 | 14QM169H | 28.6 | 85.5 | 28.3 | 6.9 | 4.7 | 29.4 | 87.4 |
| 872 | P♂       | 29.4 | 84.6 | 31.6 | 7.1 | 4.5 | 29.3 | 85.5 |
| 873 | 14QM170H | 30.6 | 87.5 | 31.5 | 7.0 | 4.9 | 30.5 | 86.6 |
| 874 | 14QM170  | 29.9 | 84.5 | 29.2 | 7.0 | 5.5 | 30.1 | 86.4 |
| 875 | 14QM171  | 30.2 | 86.5 | 30.1 | 6.9 | 5.1 | 31.2 | 84.9 |
| 876 | 14QM171H | 30.7 | 85.1 | 31.2 | 6.9 | 4.1 | 30.4 | 85.4 |
| 877 | P♂       | 31.0 | 85.8 | 28.7 | 7.0 | 5.2 | 29.3 | 85.5 |
| 878 | 14QM172H | 31.2 | 85.3 | 31.2 | 7.0 | 4.7 | 29.8 | 83.5 |
| 879 | 14QM172  | 31.1 | 85.2 | 32.5 | 7.0 | 4.4 | 30.4 | 85.3 |
| 880 | 14QM173  | 32.1 | 85.4 | 32.3 | 7.1 | 4.7 | 30.4 | 85.0 |
| 881 | 14QM173H | 31.0 | 85.6 | 31.4 | 7.0 | 5.0 | 30.7 | 86.1 |
| 882 | P♂       | 30.3 | 86.6 | 29.8 | 6.9 | 4.6 | 29.3 | 85.5 |
| 883 | 14QM174H | 28.7 | 85.3 | 30.1 | 7.0 | 4.8 | 28.6 | 86.3 |
| 884 | 14QM174  | 30.2 | 86.7 | 30.6 | 7.0 | 4.9 | 30.8 | 87.2 |
| 885 | 14QM175  | 30.4 | 85.3 | 32.0 | 7.1 | 4.8 | 31.0 | 84.4 |
| 886 | 14QM175H | 31.4 | 86.3 | 31.0 | 6.9 | 4.5 | 30.0 | 86.1 |
| 887 | P♂       | 30.5 | 84.5 | 31.3 | 6.9 | 4.4 | 29.3 | 85.5 |
| 888 | 14QM176H | 31.6 | 87.0 | 30.4 | 6.9 | 4.6 | 31.9 | 86.2 |
| 889 | 14QM176  | 33.1 | 86.5 | 32.1 | 7.0 | 4.4 | 32.8 | 85.1 |
| 890 | 14QM177  | 29.9 | 85.9 | 30.4 | 6.9 | 4.2 | 29.0 | 84.5 |
| 891 | 14QM177H | 31.6 | 84.9 | 32.0 | 7.0 | 4.1 | 31.2 | 88.1 |
| 892 | P♂       | 30.4 | 85.2 | 30.0 | 7.0 | 4.4 | 29.3 | 85.5 |
| 893 | 14QM178H | 31.0 | 83.8 | 32.3 | 7.0 | 4.7 | 30.1 | 84.8 |
| 894 | 14QM178  | 32.4 | 85.2 | 31.7 | 7.0 | 4.7 | 32.6 | 84.7 |
| 895 | 14QM179  | 31.2 | 85.3 | 30.9 | 7.0 | 4.7 | 30.6 | 85.6 |
| 896 | 14QM179H | 31.0 | 85.8 | 30.5 | 7.1 | 5.4 | 30.6 | 85.6 |

|     |    |      |      |      |     |     |      |      |
|-----|----|------|------|------|-----|-----|------|------|
| 897 | P♂ | 29.7 | 83.6 | 29.3 | 6.9 | 4.6 | 29.3 | 85.5 |
| 898 | P♂ | 30.0 | 85.3 | 30.1 | 6.9 | 4.5 | 30.8 | 86.3 |
| 899 | F1 | 31.3 | 86.0 | 30.9 | 7.1 | 5.1 | 31.4 | 86.4 |
| 900 | P♀ | 30.3 | 84.9 | 30.0 | 6.9 | 5.0 | 31.3 | 85.8 |

4QM003H- 14QM179H refer to 177 F<sub>14</sub>BC progenies in BC/P population.

| FS(cN/tex<br>) | FE/%   | FM     | FL/mm  | FU/%   | FS(cN/tex<br>) | FE/%   | FM     |
|----------------|--------|--------|--------|--------|----------------|--------|--------|
| 2016E1         | 2016E1 | 2016E1 | 2016E2 | 2016E2 | 2016E2         | 2016E2 | 2016E2 |
| 28.1           | 6.7    | 5.5    | 29.3   | 86.2   | 28.9           | 6.8    | 5.0    |
| 29.0           | 6.8    | 5.1    | 30.7   | 86.3   | 31.9           | 6.9    | 4.8    |
| 26.3           | 6.8    | 5.5    | 28.4   | 84.9   | 29.2           | 6.6    | 4.9    |
| 27.5           | 6.8    | 5.0    | 30.1   | 87.2   | 30.2           | 6.8    | 4.9    |
| 27.0           | 6.7    | 5.1    | 30.5   | 86.0   | 29.6           | 6.8    | 4.9    |
| 31.8           | 6.8    | 4.9    | 29.3   | 82.9   | 31.1           | 6.7    | 4.8    |
| 28.0           | 6.7    | 4.3    | 30.8   | 85.3   | 30.6           | 6.7    | 4.3    |
| 26.3           | 6.8    | 5.5    | 28.4   | 84.9   | 29.2           | 6.6    | 4.9    |
| 27.6           | 6.7    | 5.2    | 29.9   | 85.7   | 28.6           | 6.7    | 5.1    |
| 31.1           | 6.9    | 4.8    | 30.3   | 85.6   | 30.5           | 6.7    | 4.8    |
| 27.2           | 6.8    | 5.5    | 29.5   | 85.0   | 28.2           | 6.8    | 5.6    |
| 27.2           | 6.9    | 5.5    | 29.8   | 86.3   | 29.0           | 6.8    | 5.3    |
| 26.3           | 6.8    | 5.5    | 28.4   | 84.9   | 29.2           | 6.6    | 4.9    |
| 28.7           | 6.8    | 4.5    | 29.3   | 84.1   | 29.0           | 6.7    | 4.7    |
| 29.6           | 6.8    | 4.5    | 27.8   | 84.6   | 28.8           | 6.6    | 4.8    |
| 28.6           | 6.7    | 4.2    | 28.6   | 85.3   | 26.7           | 6.7    | 5.7    |
| 25.9           | 6.6    | 5.3    | 28.9   | 85.0   | 28.4           | 6.7    | 5.4    |
| 26.3           | 6.8    | 5.5    | 28.4   | 84.9   | 29.2           | 6.6    | 4.9    |
| 28.1           | 6.9    | 4.4    | 29.9   | 86.8   | 28.5           | 6.8    | 5.1    |
| 30.8           | 6.8    | 4.7    | 29.0   | 86.7   | 28.9           | 6.7    | 4.9    |
| 27.0           | 6.6    | 5.6    | 30.6   | 87.5   | 29.4           | 6.8    | 5.6    |
| 29.3           | 6.9    | 5.3    | 31.4   | 87.2   | 29.3           | 6.8    | 4.8    |
| 26.3           | 6.8    | 5.5    | 28.4   | 84.9   | 29.2           | 6.6    | 4.9    |
| 31.0           | 6.9    | 4.5    | 30.3   | 85.6   | 30.9           | 6.8    | 4.9    |
| 29.5           | 6.8    | 5.2    | 29.8   | 85.2   | 29.8           | 6.7    | 5.1    |
| 27.0           | 6.7    | 5.5    | 29.1   | 86.3   | 27.7           | 6.8    | 5.7    |
| 28.2           | 6.7    | 3.8    | 29.5   | 85.2   | 27.3           | 6.7    | 5.3    |
| 26.3           | 6.8    | 5.5    | 28.4   | 84.9   | 29.2           | 6.6    | 4.9    |
| 30.5           | 6.8    | 4.4    | 30.3   | 87.1   | 27.7           | 6.7    | 5.3    |
| 26.8           | 6.7    | 4.9    | 29.4   | 86.0   | 27.9           | 6.7    | 5.0    |
| 27.7           | 6.8    | 4.5    | 30.6   | 86.7   | 28.4           | 6.9    | 4.8    |
| 27.4           | 6.8    | 5.1    | 29.9   | 84.1   | 29.0           | 6.8    | 5.0    |
| 26.3           | 6.8    | 5.5    | 28.4   | 84.9   | 29.2           | 6.6    | 4.9    |
| 27.8           | 6.8    | 5.1    | 29.9   | 87.0   | 28.7           | 6.8    | 5.3    |
| 28.9           | 6.8    | 5.2    | 29.0   | 85.2   | 27.8           | 6.7    | 5.4    |
| 29.8           | 6.9    | 4.4    | 29.7   | 86.8   | 30.1           | 6.7    | 4.6    |
| 28.6           | 6.9    | 4.7    | 30.3   | 85.5   | 29.5           | 6.8    | 5.1    |
| 26.3           | 6.8    | 5.5    | 28.4   | 84.9   | 29.2           | 6.6    | 4.9    |
| 28.9           | 6.8    | 4.7    | 28.9   | 85.2   | 29.4           | 6.7    | 5.0    |
| 31.9           | 6.9    | 4.3    | 30.7   | 86.4   | 30.2           | 6.8    | 4.5    |
| 28.0           | 6.7    | 4.6    | 28.5   | 85.7   | 29.1           | 6.7    | 5.6    |
| 31.4           | 6.8    | 4.3    | 28.9   | 85.3   | 29.1           | 6.8    | 5.6    |
| 26.3           | 6.8    | 5.5    | 28.4   | 84.9   | 29.2           | 6.6    | 4.9    |
| 28.4           | 6.8    | 4.5    | 30.4   | 85.6   | 30.1           | 6.8    | 5.1    |
| 29.3           | 6.9    | 4.6    | 30.6   | 83.4   | 30.5           | 6.8    | 4.8    |
| 29.2           | 6.8    | 4.6    | 28.4   | 84.3   | 28.6           | 6.7    | 5.7    |

|      |     |     |      |      |      |     |     |
|------|-----|-----|------|------|------|-----|-----|
| 27.6 | 6.8 | 4.8 | 29.5 | 85.4 | 28.4 | 6.8 | 5.4 |
| 26.3 | 6.8 | 5.5 | 28.4 | 84.9 | 29.2 | 6.6 | 4.9 |
| 28.5 | 6.8 | 4.6 | 29.9 | 87.2 | 28.9 | 6.8 | 5.4 |
| 28.5 | 6.8 | 4.6 | 30.7 | 87.4 | 32.4 | 7.0 | 4.9 |
| 28.9 | 6.7 | 4.4 | 28.0 | 85.1 | 27.4 | 6.6 | 5.0 |
| 29.5 | 6.8 | 4.5 | 29.0 | 85.2 | 27.8 | 6.7 | 5.3 |
| 26.4 | 6.7 | 4.4 | 28.6 | 84.8 | 27.1 | 6.8 | 5.9 |
| 30.1 | 6.9 | 4.5 | 29.5 | 84.1 | 29.7 | 6.8 | 4.5 |
| 28.9 | 6.8 | 4.5 | 27.6 | 85.2 | 29.8 | 6.7 | 4.3 |
| 30.7 | 6.7 | 3.8 | 29.3 | 85.6 | 28.7 | 6.8 | 4.9 |
| 28.7 | 6.9 | 5.7 | 28.2 | 86.6 | 26.3 | 6.6 | 5.0 |
| 26.4 | 6.7 | 4.4 | 28.6 | 84.8 | 27.1 | 6.8 | 5.9 |
| 28.0 | 6.8 | 4.9 | 30.2 | 86.6 | 28.0 | 6.8 | 4.9 |
| 28.6 | 6.9 | 5.3 | 29.4 | 86.6 | 27.8 | 6.8 | 5.4 |
| 27.4 | 6.8 | 4.7 | 29.3 | 85.1 | 28.1 | 6.7 | 5.0 |
| 27.8 | 6.8 | 4.7 | 28.7 | 84.9 | 28.0 | 6.7 | 5.4 |
| 26.4 | 6.7 | 4.4 | 28.6 | 84.8 | 27.1 | 6.8 | 5.9 |
| 27.9 | 6.8 | 5.1 | 28.7 | 86.2 | 28.1 | 6.7 | 5.4 |
| 27.9 | 6.8 | 5.3 | 26.5 | 84.0 | 26.8 | 6.6 | 5.6 |
| 28.8 | 6.9 | 4.5 | 30.4 | 86.8 | 29.5 | 6.8 | 4.7 |
| 28.2 | 6.8 | 4.1 | 30.5 | 85.6 | 29.5 | 6.8 | 5.1 |
| 26.4 | 6.7 | 4.4 | 28.6 | 84.8 | 27.1 | 6.8 | 5.9 |
| 29.1 | 6.9 | 3.9 | 29.9 | 87.8 | 27.7 | 6.7 | 4.7 |
| 29.1 | 6.8 | 4.1 | 30.2 | 84.5 | 28.7 | 6.8 | 4.7 |
| 27.8 | 6.7 | 3.5 | 29.9 | 86.9 | 28.9 | 6.7 | 4.8 |
| 30.2 | 6.9 | 4.0 | 29.5 | 86.0 | 28.4 | 6.8 | 4.7 |
| 26.4 | 6.7 | 4.4 | 28.6 | 84.8 | 27.1 | 6.8 | 5.9 |
| 28.3 | 6.8 | 5.3 | 29.7 | 83.9 | 28.2 | 6.7 | 5.3 |
| 29.7 | 6.9 | 5.4 | 25.9 | 83.0 | 26.2 | 6.6 | 5.8 |
| 28.0 | 6.8 | 5.6 | 30.0 | 87.0 | 29.8 | 6.8 | 4.9 |
| 27.8 | 6.8 | 5.7 | 29.4 | 85.3 | 28.5 | 6.7 | 5.1 |
| 26.4 | 6.7 | 4.4 | 28.6 | 84.8 | 27.1 | 6.8 | 5.9 |
| 28.1 | 6.8 | 5.5 | 26.6 | 83.5 | 26.2 | 6.6 | 5.4 |
| 29.2 | 6.8 | 5.4 | 29.1 | 84.5 | 29.8 | 6.7 | 4.6 |
| 29.1 | 6.7 | 4.6 | 30.1 | 85.4 | 28.2 | 6.7 | 4.8 |
| 29.1 | 6.7 | 4.6 | 29.8 | 84.8 | 29.3 | 6.7 | 4.6 |
| 26.4 | 6.7 | 4.4 | 28.6 | 84.8 | 27.1 | 6.8 | 5.9 |
| 27.8 | 6.8 | 5.1 | 29.3 | 87.0 | 29.1 | 6.7 | 4.9 |
| 27.4 | 6.9 | 4.8 | 29.7 | 87.4 | 28.9 | 6.8 | 5.3 |
| 29.5 | 6.7 | 4.7 | 30.0 | 87.1 | 31.2 | 6.7 | 4.2 |
| 27.7 | 6.7 | 4.9 | 29.8 | 85.2 | 29.4 | 6.7 | 4.6 |
| 26.4 | 6.7 | 4.4 | 28.6 | 84.8 | 27.1 | 6.8 | 5.9 |
| 27.3 | 6.7 | 4.9 | 28.3 | 84.4 | 28.8 | 6.7 | 5.0 |
| 26.4 | 6.6 | 4.9 | 30.1 | 85.5 | 29.2 | 6.8 | 5.1 |
| 27.8 | 6.8 | 5.6 | 28.7 | 85.4 | 27.7 | 6.7 | 5.5 |
| 28.0 | 6.8 | 5.4 | 29.8 | 86.4 | 28.8 | 6.8 | 5.4 |
| 26.4 | 6.7 | 4.4 | 28.6 | 84.8 | 27.1 | 6.8 | 5.9 |
| 28.5 | 6.7 | 4.4 | 30.0 | 87.8 | 28.1 | 6.8 | 5.4 |
| 29.3 | 6.8 | 5.0 | 27.5 | 82.2 | 27.5 | 6.6 | 5.1 |
| 30.3 | 6.9 | 4.9 | 29.1 | 83.6 | 28.4 | 6.7 | 4.6 |

|      |     |     |      |      |      |     |     |
|------|-----|-----|------|------|------|-----|-----|
| 29.6 | 6.7 | 3.9 | 27.9 | 84.6 | 28.8 | 6.7 | 4.5 |
| 26.4 | 6.7 | 4.4 | 28.6 | 84.8 | 27.1 | 6.8 | 5.9 |
| 27.9 | 6.9 | 5.4 | 29.9 | 86.0 | 28.1 | 6.7 | 5.1 |
| 28.8 | 6.9 | 5.3 | 30.9 | 85.6 | 28.9 | 6.9 | 5.8 |
| 26.7 | 6.8 | 5.3 | 28.2 | 86.2 | 28.3 | 6.7 | 4.9 |
| 29.0 | 6.9 | 4.7 | 28.7 | 85.1 | 27.4 | 6.7 | 5.0 |
| 28.0 | 6.8 | 3.9 | 27.6 | 84.1 | 27.0 | 6.6 | 5.0 |
| 27.7 | 6.8 | 5.1 | 29.6 | 85.3 | 31.1 | 6.8 | 5.1 |
| 27.2 | 6.8 | 5.0 | 27.6 | 82.1 | 26.8 | 6.6 | 5.7 |
| 29.7 | 6.8 | 5.1 | 28.1 | 83.9 | 28.8 | 6.7 | 4.8 |
| 31.0 | 7.0 | 4.8 | 30.2 | 87.4 | 29.2 | 6.8 | 4.7 |
| 28.0 | 6.8 | 3.9 | 27.6 | 84.1 | 27.0 | 6.6 | 5.0 |
| 28.8 | 6.8 | 4.6 | 29.8 | 86.0 | 26.8 | 6.7 | 5.4 |
| 27.1 | 6.7 | 5.2 | 29.9 | 86.6 | 28.3 | 6.7 | 4.9 |
| 29.4 | 6.8 | 5.3 | 29.2 | 86.2 | 29.3 | 6.7 | 5.1 |
| 27.6 | 6.8 | 5.7 | 29.7 | 87.2 | 28.3 | 6.7 | 4.9 |
| 28.0 | 6.8 | 3.9 | 27.6 | 84.1 | 27.0 | 6.6 | 5.0 |
| 28.0 | 6.7 | 4.4 | 28.5 | 85.6 | 28.6 | 6.7 | 4.5 |
| 27.7 | 6.6 | 4.3 | 28.9 | 86.6 | 28.2 | 6.7 | 4.6 |
| 29.6 | 6.8 | 4.5 | 28.4 | 86.9 | 29.5 | 6.7 | 4.2 |
| 28.3 | 6.8 | 4.8 | 30.4 | 88.2 | 28.6 | 6.8 | 4.8 |
| 28.0 | 6.8 | 3.9 | 27.6 | 84.1 | 27.0 | 6.6 | 5.0 |
| 28.4 | 6.8 | 4.7 | 30.4 | 86.5 | 29.6 | 6.8 | 5.1 |
| 31.4 | 6.8 | 4.8 | 28.9 | 84.9 | 29.2 | 6.7 | 5.3 |
| 28.9 | 6.8 | 5.1 | 28.0 | 85.5 | 28.3 | 6.6 | 5.3 |
| 29.0 | 6.7 | 4.7 | 29.1 | 85.3 | 28.9 | 6.7 | 5.7 |
| 28.0 | 6.8 | 3.9 | 27.6 | 84.1 | 27.0 | 6.6 | 5.0 |
| 29.1 | 6.8 | 4.9 | 28.5 | 84.7 | 28.0 | 6.7 | 5.1 |
| 28.1 | 6.7 | 5.1 | 28.8 | 86.9 | 29.6 | 6.7 | 5.0 |
| 29.8 | 6.7 | 4.8 | 30.5 | 84.7 | 30.9 | 6.7 | 4.5 |
| 30.6 | 6.9 | 4.8 | 31.0 | 86.8 | 31.3 | 6.8 | 4.6 |
| 28.0 | 6.8 | 3.9 | 27.6 | 84.1 | 27.0 | 6.6 | 5.0 |
| 26.0 | 6.6 | 5.0 | 29.5 | 85.3 | 28.8 | 6.8 | 4.7 |
| 27.1 | 6.7 | 4.6 | 29.2 | 86.0 | 29.7 | 6.8 | 4.9 |
| 27.0 | 6.6 | 4.9 | 26.2 | 83.4 | 28.9 | 6.5 | 5.0 |
| 28.9 | 6.7 | 4.6 | 29.5 | 86.5 | 28.9 | 6.7 | 5.4 |
| 28.0 | 6.8 | 3.9 | 27.6 | 84.1 | 27.0 | 6.6 | 5.0 |
| 29.9 | 6.8 | 4.7 | 30.2 | 86.7 | 29.1 | 6.8 | 4.8 |
| 30.9 | 6.8 | 4.7 | 28.9 | 84.6 | 29.6 | 6.7 | 4.6 |
| 27.1 | 6.8 | 4.8 | 26.6 | 81.6 | 26.5 | 6.6 | 5.0 |
| 26.3 | 6.7 | 4.9 | 27.4 | 83.9 | 26.7 | 6.6 | 4.9 |
| 28.0 | 6.8 | 3.9 | 27.6 | 84.1 | 27.0 | 6.6 | 5.0 |
| 27.6 | 6.8 | 4.7 | 29.2 | 86.5 | 30.6 | 6.8 | 4.6 |
| 31.2 | 6.9 | 4.6 | 29.4 | 85.8 | 31.8 | 6.7 | 4.2 |
| 28.9 | 6.7 | 4.5 | 25.5 | 82.8 | 25.5 | 6.5 | 5.2 |
| 30.1 | 6.9 | 5.0 | 28.1 | 86.2 | 27.2 | 6.6 | 5.1 |
| 28.0 | 6.8 | 3.9 | 27.6 | 84.1 | 27.0 | 6.6 | 5.0 |
| 27.5 | 6.8 | 5.3 | 29.2 | 86.4 | 29.0 | 6.7 | 4.9 |
| 29.2 | 6.9 | 5.5 | 29.8 | 86.2 | 31.9 | 6.8 | 4.6 |
| 28.0 | 6.8 | 5.6 | 27.0 | 84.7 | 28.9 | 6.6 | 5.0 |



|      |     |     |      |      |      |     |     |
|------|-----|-----|------|------|------|-----|-----|
| 26.5 | 6.7 | 5.4 | 29.2 | 86.5 | 29.7 | 6.7 | 4.9 |
| 28.0 | 6.8 | 3.9 | 27.6 | 84.1 | 27.0 | 6.6 | 5.0 |
| 28.1 | 6.9 | 5.3 | 28.7 | 84.1 | 31.9 | 6.7 | 4.2 |
| 30.2 | 6.9 | 5.0 | 26.9 | 81.0 | 29.6 | 6.6 | 4.5 |
| 27.7 | 6.7 | 4.9 | 29.0 | 86.5 | 31.0 | 6.7 | 4.8 |
| 29.4 | 6.9 | 5.0 | 27.7 | 84.5 | 29.0 | 6.6 | 4.6 |
| 27.8 | 6.8 | 5.2 | 30.0 | 87.3 | 30.4 | 6.8 | 4.6 |
| 29.2 | 6.8 | 4.8 | 27.9 | 84.2 | 29.6 | 6.7 | 5.2 |
| 27.3 | 6.7 | 5.2 | 30.2 | 86.4 | 31.1 | 6.8 | 5.4 |
| 30.1 | 6.8 | 4.4 | 30.4 | 87.2 | 29.8 | 6.7 | 5.0 |
| 28.6 | 6.8 | 5.1 | 30.3 | 86.3 | 30.0 | 6.7 | 4.5 |
| 27.8 | 6.8 | 5.2 | 30.0 | 87.3 | 30.4 | 6.8 | 4.6 |
| 27.1 | 6.6 | 5.0 | 28.9 | 83.2 | 29.2 | 6.7 | 5.3 |
| 27.0 | 6.7 | 5.2 | 28.4 | 83.2 | 27.5 | 6.7 | 5.1 |
| 29.1 | 6.7 | 4.6 | 29.0 | 85.5 | 27.7 | 6.7 | 5.4 |
| 28.5 | 6.7 | 3.5 | 28.8 | 86.3 | 28.4 | 6.7 | 5.0 |
| 27.8 | 6.8 | 5.2 | 30.0 | 87.3 | 30.4 | 6.8 | 4.6 |
| 27.0 | 6.7 | 5.0 | 30.5 | 86.7 | 29.3 | 6.8 | 5.0 |
| 28.2 | 6.8 | 5.3 | 30.2 | 84.8 | 30.5 | 6.8 | 4.7 |
| 26.6 | 6.7 | 5.8 | 27.5 | 84.7 | 26.9 | 6.6 | 5.6 |
| 27.4 | 6.8 | 5.6 | 28.7 | 85.6 | 28.1 | 6.7 | 5.2 |
| 27.8 | 6.8 | 5.2 | 30.0 | 87.3 | 30.4 | 6.8 | 4.6 |
| 26.9 | 6.8 | 5.0 | 28.7 | 85.2 | 28.8 | 6.6 | 4.4 |
| 29.2 | 6.8 | 5.4 | 30.1 | 86.1 | 28.9 | 6.7 | 4.8 |
| 28.6 | 6.8 | 4.5 | 29.7 | 87.1 | 30.8 | 6.8 | 4.5 |
| 26.4 | 6.8 | 5.6 | 29.2 | 85.5 | 29.5 | 6.7 | 4.6 |
| 27.8 | 6.8 | 5.2 | 30.0 | 87.3 | 30.4 | 6.8 | 4.6 |
| 29.2 | 6.8 | 4.6 | 29.3 | 85.1 | 30.2 | 6.7 | 4.3 |
| 28.5 | 6.7 | 5.0 | 28.9 | 83.5 | 28.7 | 6.6 | 4.8 |
| 31.9 | 6.9 | 5.0 | 30.7 | 85.2 | 31.7 | 6.8 | 4.7 |
| 28.2 | 6.8 | 5.0 | 29.8 | 87.2 | 30.5 | 6.8 | 4.8 |
| 27.8 | 6.8 | 5.2 | 30.0 | 87.3 | 30.4 | 6.8 | 4.6 |
| 31.0 | 6.9 | 4.8 | 29.5 | 86.0 | 30.2 | 6.8 | 5.1 |
| 30.9 | 6.8 | 4.7 | 27.2 | 83.2 | 26.2 | 6.5 | 5.1 |
| 27.6 | 6.9 | 4.2 | 30.0 | 84.5 | 27.4 | 6.7 | 4.3 |
| 27.9 | 6.7 | 3.9 | 30.3 | 85.6 | 28.7 | 6.8 | 4.7 |
| 27.8 | 6.8 | 5.2 | 30.0 | 87.3 | 30.4 | 6.8 | 4.6 |
| 26.3 | 6.7 | 4.9 | 29.4 | 85.0 | 28.1 | 6.7 | 4.6 |
| 25.8 | 6.7 | 5.3 | 28.5 | 84.9 | 27.1 | 6.7 | 4.9 |
| 27.6 | 6.7 | 4.9 | 28.6 | 85.5 | 27.4 | 6.7 | 5.2 |
| 28.1 | 6.8 | 4.3 | 28.7 | 85.1 | 29.2 | 6.8 | 5.1 |
| 27.8 | 6.8 | 5.2 | 30.0 | 87.3 | 30.4 | 6.8 | 4.6 |
| 29.2 | 6.8 | 4.4 | 31.1 | 86.8 | 28.6 | 6.8 | 4.6 |
| 27.0 | 6.7 | 5.1 | 29.1 | 85.4 | 28.8 | 6.7 | 4.7 |
| 30.3 | 6.8 | 4.7 | 30.8 | 85.9 | 29.5 | 6.7 | 5.1 |
| 29.0 | 6.7 | 4.7 | 30.0 | 85.9 | 29.8 | 6.7 | 5.1 |
| 27.8 | 6.8 | 5.2 | 30.0 | 87.3 | 30.4 | 6.8 | 4.6 |
| 29.0 | 6.8 | 4.7 | 27.5 | 84.6 | 27.9 | 6.6 | 4.6 |
| 28.7 | 6.7 | 4.3 | 27.0 | 82.4 | 26.5 | 6.6 | 4.9 |
| 29.5 | 6.8 | 4.8 | 30.2 | 87.1 | 29.6 | 6.7 | 4.8 |

|      |     |     |      |      |      |     |     |
|------|-----|-----|------|------|------|-----|-----|
| 28.6 | 6.7 | 4.6 | 29.5 | 85.6 | 28.1 | 6.7 | 4.9 |
| 27.8 | 6.8 | 5.2 | 30.0 | 87.3 | 30.4 | 6.8 | 4.6 |
| 28.0 | 6.7 | 4.4 | 27.4 | 84.0 | 27.7 | 6.6 | 4.9 |
| 31.4 | 6.8 | 4.8 | 29.9 | 86.2 | 30.2 | 6.8 | 4.9 |
| 28.8 | 6.9 | 5.1 | 29.4 | 85.0 | 29.0 | 6.8 | 5.5 |
| 28.6 | 6.7 | 4.6 | 27.1 | 84.3 | 26.4 | 6.6 | 5.3 |
| 29.9 | 6.9 | 5.3 | 28.9 | 86.2 | 27.0 | 6.7 | 5.1 |
| 31.1 | 6.9 | 4.5 | 30.1 | 87.1 | 28.3 | 6.7 | 4.9 |
| 27.1 | 6.8 | 5.6 | 29.1 | 85.9 | 30.5 | 6.8 | 5.4 |
| 31.4 | 6.8 | 4.3 | 30.4 | 85.6 | 31.2 | 6.8 | 4.9 |
| 29.4 | 6.9 | 4.8 | 30.1 | 86.0 | 28.5 | 6.7 | 5.1 |
| 29.9 | 6.9 | 5.3 | 28.9 | 86.2 | 27.0 | 6.7 | 5.1 |
| 27.4 | 6.8 | 5.2 | 30.9 | 87.1 | 29.7 | 6.9 | 5.7 |
| 27.6 | 6.8 | 5.4 | 29.4 | 86.0 | 27.4 | 6.8 | 6.0 |
| 29.1 | 6.9 | 5.2 | 28.6 | 83.8 | 30.2 | 6.8 | 5.6 |
| 27.8 | 6.7 | 4.9 | 28.0 | 84.5 | 28.1 | 6.7 | 5.0 |
| 29.9 | 6.9 | 5.3 | 28.9 | 86.2 | 27.0 | 6.7 | 5.1 |
| 28.3 | 6.9 | 5.2 | 28.7 | 84.6 | 27.9 | 6.6 | 4.3 |
| 28.6 | 6.9 | 5.8 | 28.3 | 85.3 | 28.6 | 6.7 | 5.7 |
| 28.2 | 6.7 | 5.7 | 27.2 | 84.4 | 27.6 | 6.7 | 5.9 |
| 26.9 | 6.8 | 5.4 | 28.5 | 84.0 | 28.7 | 6.7 | 5.1 |
| 29.9 | 6.9 | 5.3 | 28.9 | 86.2 | 27.0 | 6.7 | 5.1 |
| 28.4 | 6.9 | 5.2 | 30.2 | 85.7 | 27.9 | 6.7 | 5.3 |
| 31.0 | 6.9 | 4.5 | 30.9 | 85.9 | 31.8 | 6.8 | 4.2 |
| 29.4 | 6.8 | 4.9 | 28.1 | 84.0 | 27.0 | 6.6 | 5.0 |
| 28.0 | 6.8 | 5.1 | 27.9 | 82.7 | 27.4 | 6.6 | 4.8 |
| 29.9 | 6.9 | 5.3 | 28.9 | 86.2 | 27.0 | 6.7 | 5.1 |
| 29.4 | 6.8 | 5.1 | 27.8 | 85.4 | 26.7 | 6.6 | 5.5 |
| 28.2 | 6.8 | 5.7 | 29.8 | 86.7 | 30.0 | 6.7 | 5.1 |
| 29.8 | 6.8 | 5.3 | 29.8 | 86.4 | 29.1 | 6.7 | 5.7 |
| 29.9 | 6.9 | 5.3 | 28.9 | 86.2 | 27.0 | 6.7 | 5.1 |
| 28.1 | 6.8 | 5.0 | 29.4 | 86.2 | 29.9 | 6.8 | 5.5 |
| 27.4 | 6.8 | 4.8 | 31.3 | 87.2 | 30.1 | 6.8 | 5.1 |
| 27.9 | 6.8 | 4.8 | 29.0 | 84.4 | 28.4 | 6.7 | 4.9 |
| 29.4 | 6.8 | 4.6 | 28.7 | 84.3 | 27.5 | 6.7 | 5.1 |
| 29.9 | 6.9 | 5.3 | 28.9 | 86.2 | 27.0 | 6.7 | 5.1 |
| 28.7 | 6.7 | 5.1 | 28.6 | 85.6 | 28.0 | 6.7 | 4.8 |
| 26.1 | 6.6 | 5.6 | 28.8 | 84.3 | 27.9 | 6.7 | 5.4 |
| 29.1 | 6.8 | 5.4 | 27.6 | 83.7 | 27.4 | 6.7 | 5.5 |
| 29.9 | 6.8 | 4.8 | 30.1 | 86.0 | 27.6 | 6.7 | 4.9 |
| 29.9 | 6.9 | 5.3 | 28.9 | 86.2 | 27.0 | 6.7 | 5.1 |
| 27.6 | 6.8 | 5.1 | 29.0 | 84.1 | 27.6 | 6.7 | 4.6 |
| 28.4 | 6.8 | 4.6 | 31.4 | 84.4 | 29.6 | 6.8 | 4.5 |
| 28.5 | 6.8 | 5.3 | 27.7 | 82.7 | 27.0 | 6.6 | 5.0 |
| 30.0 | 6.8 | 4.5 | 29.0 | 85.7 | 27.0 | 6.7 | 4.9 |
| 29.9 | 6.9 | 5.3 | 28.9 | 86.2 | 27.0 | 6.7 | 5.1 |
| 28.5 | 6.9 | 5.3 | 29.9 | 84.2 | 29.8 | 6.8 | 4.2 |
| 28.4 | 6.8 | 4.6 | 28.0 | 83.2 | 27.5 | 6.7 | 5.0 |
| 27.4 | 6.7 | 4.7 | 29.6 | 87.0 | 29.8 | 6.8 | 5.2 |
| 25.9 | 6.6 | 5.3 | 28.3 | 82.7 | 28.9 | 6.7 | 5.1 |

|      |     |     |      |      |      |     |     |
|------|-----|-----|------|------|------|-----|-----|
| 29.9 | 6.9 | 5.3 | 28.9 | 86.2 | 27.0 | 6.7 | 5.1 |
| 27.3 | 6.8 | 5.6 | 29.3 | 83.2 | 31.4 | 6.8 | 4.1 |
| 27.6 | 6.8 | 5.5 | 29.3 | 86.2 | 28.9 | 6.8 | 5.4 |
| 29.3 | 6.8 | 5.2 | 28.7 | 86.6 | 29.3 | 6.7 | 5.2 |
| 29.0 | 6.8 | 5.5 | 29.4 | 86.0 | 29.8 | 6.8 | 5.0 |
| 29.6 | 6.9 | 5.4 | 27.7 | 84.9 | 27.2 | 6.6 | 4.6 |
| 28.9 | 6.8 | 4.4 | 29.1 | 86.2 | 28.6 | 6.7 | 4.6 |
| 26.5 | 6.8 | 5.1 | 28.9 | 85.5 | 28.0 | 6.7 | 4.8 |
| 30.8 | 6.9 | 4.5 | 30.6 | 84.5 | 31.7 | 6.9 | 4.6 |
| 27.2 | 6.8 | 4.9 | 31.6 | 87.2 | 31.9 | 6.9 | 4.5 |
| 29.6 | 6.9 | 5.4 | 27.7 | 84.9 | 27.2 | 6.6 | 4.6 |
| 27.5 | 6.8 | 4.9 | 29.3 | 84.8 | 28.5 | 6.7 | 4.5 |
| 29.3 | 6.9 | 4.6 | 29.5 | 87.8 | 30.1 | 6.8 | 4.6 |
| 28.8 | 6.8 | 4.9 | 29.6 | 87.8 | 29.5 | 6.8 | 4.7 |
| 30.5 | 6.8 | 4.3 | 29.5 | 86.9 | 30.8 | 6.7 | 4.3 |
| 29.6 | 6.9 | 5.4 | 27.7 | 84.9 | 27.2 | 6.6 | 4.6 |
| 28.4 | 6.8 | 4.3 | 29.4 | 86.4 | 29.8 | 6.8 | 4.7 |
| 29.9 | 6.9 | 4.9 | 31.5 | 86.8 | 31.4 | 6.8 | 4.6 |
| 29.1 | 6.8 | 5.6 | 29.2 | 85.7 | 30.7 | 6.7 | 4.9 |
| 28.8 | 6.9 | 5.6 | 29.2 | 86.7 | 27.8 | 6.7 | 5.1 |
| 29.6 | 6.9 | 5.4 | 27.7 | 84.9 | 27.2 | 6.6 | 4.6 |
| 28.2 | 6.8 | 5.3 | 28.8 | 84.6 | 28.0 | 6.7 | 5.1 |
| 27.3 | 6.8 | 4.8 | 27.5 | 82.8 | 26.6 | 6.6 | 5.2 |
| 26.9 | 6.7 | 4.2 | 28.6 | 86.3 | 28.9 | 6.7 | 4.7 |
| 28.8 | 6.8 | 4.4 | 29.1 | 84.4 | 30.2 | 6.8 | 4.6 |
| 29.6 | 6.9 | 5.4 | 27.7 | 84.9 | 27.2 | 6.6 | 4.6 |
| 29.1 | 6.7 | 4.8 | 29.7 | 85.3 | 31.9 | 6.8 | 4.2 |
| 28.9 | 6.7 | 5.4 | 28.5 | 84.0 | 30.3 | 6.7 | 5.1 |
| 27.1 | 6.8 | 5.1 | 29.4 | 84.6 | 31.7 | 6.8 | 4.6 |
| 31.4 | 6.9 | 3.9 | 29.7 | 85.6 | 30.9 | 6.8 | 4.3 |
| 29.6 | 6.9 | 5.4 | 27.7 | 84.9 | 27.2 | 6.6 | 4.6 |
| 29.8 | 6.8 | 4.4 | 30.2 | 87.4 | 31.9 | 6.9 | 4.5 |
| 29.4 | 7.0 | 5.4 | 29.1 | 85.9 | 29.8 | 6.8 | 4.8 |
| 29.1 | 6.9 | 4.9 | 28.1 | 85.3 | 28.8 | 6.7 | 5.4 |
| 29.4 | 6.9 | 4.6 | 29.3 | 84.1 | 32.0 | 6.9 | 5.2 |
| 29.6 | 6.9 | 5.4 | 27.7 | 84.9 | 27.2 | 6.6 | 4.6 |
| 28.0 | 6.8 | 4.9 | 29.4 | 84.0 | 30.3 | 6.8 | 4.7 |
| 29.5 | 6.9 | 5.0 | 27.9 | 84.0 | 30.3 | 6.7 | 5.0 |
| 29.0 | 7.0 | 5.6 | 29.9 | 84.5 | 30.5 | 6.9 | 5.5 |
| 27.2 | 7.0 | 5.5 | 29.9 | 86.5 | 29.4 | 6.7 | 5.1 |
| 29.6 | 6.9 | 5.4 | 27.7 | 84.9 | 27.2 | 6.6 | 4.6 |
| 28.2 | 6.9 | 5.1 | 27.8 | 82.3 | 29.2 | 6.7 | 4.8 |
| 26.9 | 6.8 | 4.8 | 30.2 | 86.9 | 31.3 | 6.9 | 4.6 |
| 27.4 | 6.9 | 5.5 | 26.6 | 84.3 | 26.5 | 6.6 | 5.2 |
| 28.1 | 6.8 | 4.5 | 29.6 | 85.2 | 29.1 | 6.7 | 4.7 |
| 29.6 | 6.9 | 5.4 | 27.7 | 84.9 | 27.2 | 6.6 | 4.6 |
| 30.2 | 6.9 | 4.9 | 29.6 | 85.0 | 31.2 | 6.8 | 4.7 |
| 27.0 | 6.6 | 5.0 | 27.2 | 82.7 | 26.9 | 6.6 | 5.5 |
| 30.6 | 6.8 | 4.4 | 29.1 | 84.6 | 31.3 | 6.7 | 4.3 |
| 29.5 | 6.8 | 5.1 | 29.4 | 86.4 | 30.5 | 6.8 | 4.8 |

|      |     |     |      |      |      |     |     |
|------|-----|-----|------|------|------|-----|-----|
| 29.6 | 6.9 | 5.4 | 27.7 | 84.9 | 27.2 | 6.6 | 4.6 |
| 28.3 | 6.7 | 4.9 | 28.6 | 85.3 | 27.5 | 6.7 | 5.2 |
| 28.3 | 6.7 | 4.8 | 28.0 | 82.8 | 27.0 | 6.6 | 5.4 |
| 28.0 | 6.8 | 5.3 | 28.7 | 84.3 | 28.6 | 6.6 | 5.0 |
| 30.5 | 6.9 | 4.7 | 29.4 | 86.4 | 30.1 | 6.8 | 4.5 |
| 29.6 | 6.9 | 4.7 | 29.6 | 85.7 | 29.4 | 6.8 | 4.8 |
| 29.4 | 6.8 | 4.9 | 28.8 | 84.8 | 28.6 | 6.7 | 4.6 |
| 28.8 | 6.8 | 4.7 | 30.4 | 86.2 | 31.1 | 6.9 | 5.0 |
| 30.1 | 6.9 | 5.4 | 28.5 | 84.4 | 28.7 | 6.6 | 4.5 |
| 28.5 | 6.8 | 5.0 | 29.4 | 86.4 | 31.9 | 6.8 | 5.3 |
| 29.6 | 6.9 | 4.7 | 29.6 | 85.7 | 29.4 | 6.8 | 4.8 |
| 27.6 | 6.8 | 5.6 | 29.2 | 84.6 | 30.3 | 6.7 | 4.7 |
| 29.5 | 6.9 | 5.6 | 27.6 | 82.9 | 27.2 | 6.6 | 5.6 |
| 25.1 | 6.6 | 5.8 | 28.0 | 84.8 | 28.3 | 6.7 | 5.1 |
| 27.3 | 6.7 | 4.9 | 29.4 | 87.3 | 29.0 | 6.8 | 5.1 |
| 29.6 | 6.9 | 4.7 | 29.6 | 85.7 | 29.4 | 6.8 | 4.8 |
| 27.0 | 6.7 | 5.6 | 28.5 | 85.2 | 29.6 | 6.8 | 5.1 |
| 29.9 | 6.9 | 5.5 | 29.1 | 84.7 | 30.6 | 6.8 | 4.9 |
| 28.7 | 6.7 | 4.8 | 30.0 | 85.2 | 31.5 | 6.7 | 4.1 |
| 30.6 | 6.8 | 4.9 | 29.9 | 85.0 | 30.6 | 6.7 | 4.8 |
| 29.6 | 6.9 | 4.7 | 29.6 | 85.7 | 29.4 | 6.8 | 4.8 |
| 29.9 | 6.9 | 4.6 | 30.1 | 83.0 | 29.5 | 6.8 | 4.5 |
| 28.0 | 6.8 | 4.5 | 30.2 | 86.6 | 30.0 | 6.8 | 4.8 |
| 28.7 | 6.9 | 4.9 | 30.5 | 83.9 | 30.0 | 6.8 | 4.7 |
| 26.9 | 6.8 | 4.5 | 30.2 | 83.0 | 32.5 | 6.9 | 4.7 |
| 29.6 | 6.9 | 4.7 | 29.6 | 85.7 | 29.4 | 6.8 | 4.8 |
| 30.1 | 6.9 | 4.5 | 30.9 | 86.6 | 30.7 | 6.8 | 4.8 |
| 30.6 | 6.9 | 4.6 | 29.4 | 83.6 | 30.7 | 6.7 | 3.9 |
| 27.5 | 6.7 | 3.9 | 30.4 | 83.3 | 30.4 | 6.8 | 4.2 |
| 30.1 | 6.8 | 4.8 | 30.5 | 86.2 | 30.3 | 6.8 | 4.3 |
| 29.6 | 6.9 | 4.7 | 29.6 | 85.7 | 29.4 | 6.8 | 4.8 |
| 28.5 | 6.8 | 4.1 | 28.5 | 84.3 | 28.7 | 6.8 | 5.3 |
| 28.9 | 6.8 | 4.9 | 28.8 | 85.3 | 27.2 | 6.7 | 5.1 |
| 29.7 | 6.8 | 4.7 | 30.6 | 86.7 | 31.7 | 6.9 | 5.4 |
| 30.2 | 6.8 | 4.6 | 30.4 | 84.6 | 31.2 | 6.8 | 5.0 |
| 29.6 | 6.9 | 4.7 | 29.6 | 85.7 | 29.4 | 6.8 | 4.8 |
| 27.5 | 6.8 | 4.7 | 28.0 | 82.3 | 28.6 | 6.7 | 4.9 |
| 29.4 | 6.8 | 5.1 | 27.9 | 84.8 | 27.4 | 6.6 | 5.2 |
| 29.7 | 6.8 | 5.0 | 30.8 | 85.4 | 30.4 | 6.8 | 4.7 |
| 30.1 | 6.8 | 3.5 | 29.6 | 83.6 | 27.9 | 6.7 | 5.0 |
| 29.6 | 6.9 | 4.7 | 29.6 | 85.7 | 29.4 | 6.8 | 4.8 |
| 29.3 | 6.9 | 5.4 | 30.5 | 84.9 | 29.2 | 6.8 | 5.0 |
| 29.4 | 6.8 | 5.3 | 30.8 | 86.2 | 30.2 | 6.8 | 4.8 |
| 28.5 | 6.7 | 5.2 | 31.5 | 83.8 | 31.3 | 6.8 | 4.5 |
| 30.0 | 6.8 | 4.7 | 28.0 | 77.9 | 29.4 | 6.7 | 4.8 |
| 29.6 | 6.9 | 4.7 | 29.6 | 85.7 | 29.4 | 6.8 | 4.8 |
| 27.1 | 6.8 | 5.0 | 29.5 | 85.8 | 28.5 | 6.7 | 5.0 |
| 28.0 | 6.8 | 5.4 | 29.5 | 84.2 | 28.9 | 6.7 | 4.6 |
| 28.6 | 6.6 | 4.3 | 29.1 | 84.8 | 28.6 | 6.7 | 5.0 |
| 28.3 | 6.9 | 4.8 | 30.5 | 87.0 | 30.9 | 6.8 | 4.5 |

|      |     |     |      |      |      |     |     |
|------|-----|-----|------|------|------|-----|-----|
| 29.6 | 6.9 | 4.7 | 29.6 | 85.7 | 29.4 | 6.8 | 4.8 |
| 31.9 | 6.9 | 4.9 | 30.5 | 86.3 | 29.2 | 6.8 | 5.2 |
| 28.4 | 6.9 | 5.5 | 30.0 | 84.9 | 29.4 | 6.7 | 5.3 |
| 30.9 | 6.8 | 5.0 | 30.3 | 87.9 | 30.4 | 6.8 | 4.5 |
| 28.9 | 6.7 | 5.2 | 31.6 | 84.6 | 30.3 | 6.9 | 4.4 |
| 27.5 | 6.7 | 4.8 | 29.9 | 83.8 | 27.7 | 6.7 | 5.0 |
| 26.9 | 6.8 | 4.9 | 29.4 | 84.9 | 28.4 | 6.7 | 4.8 |
| 30.3 | 6.9 | 5.4 | 28.2 | 82.3 | 28.2 | 6.7 | 4.7 |
| 28.3 | 6.7 | 4.6 | 28.8 | 82.7 | 30.0 | 6.7 | 4.4 |
| 29.4 | 6.7 | 4.9 | 29.8 | 83.5 | 28.9 | 6.8 | 5.1 |
| 27.5 | 6.7 | 4.8 | 29.9 | 83.8 | 27.7 | 6.7 | 5.0 |
| 29.1 | 6.8 | 5.2 | 30.0 | 85.0 | 28.9 | 6.8 | 4.8 |
| 25.2 | 6.6 | 2.9 | 30.7 | 85.9 | 28.8 | 6.8 | 5.4 |
| 28.5 | 6.8 | 4.7 | 29.5 | 84.9 | 27.3 | 6.7 | 4.5 |
| 30.5 | 6.8 | 4.0 | 29.7 | 85.7 | 30.1 | 6.8 | 4.4 |
| 27.5 | 6.7 | 4.8 | 29.9 | 83.8 | 27.7 | 6.7 | 5.0 |
| 29.5 | 6.8 | 5.0 | 28.2 | 84.6 | 28.5 | 6.7 | 4.7 |
| 27.2 | 6.8 | 4.7 | 28.7 | 82.6 | 27.0 | 6.7 | 4.8 |
| 28.0 | 6.8 | 5.2 | 28.6 | 84.2 | 28.5 | 6.7 | 4.5 |
| 28.1 | 7.0 | 5.3 | 29.8 | 82.0 | 29.7 | 6.8 | 5.1 |
| 27.5 | 6.7 | 4.8 | 29.9 | 83.8 | 27.7 | 6.7 | 5.0 |
| 28.1 | 6.9 | 5.4 | 28.2 | 85.2 | 28.1 | 6.7 | 4.9 |
| 31.0 | 6.9 | 4.4 | 29.8 | 86.3 | 27.8 | 6.7 | 5.2 |
| 29.8 | 6.9 | 4.3 | 29.5 | 87.1 | 28.3 | 6.7 | 5.2 |
| 28.7 | 6.8 | 4.9 | 27.8 | 82.3 | 28.0 | 6.7 | 5.4 |
| 27.5 | 6.7 | 4.8 | 29.9 | 83.8 | 27.7 | 6.7 | 5.0 |
| 27.7 | 6.7 | 4.0 | 28.6 | 85.2 | 28.3 | 6.7 | 5.4 |
| 30.0 | 6.8 | 4.3 | 27.9 | 81.5 | 27.6 | 6.7 | 5.0 |
| 29.2 | 6.9 | 5.4 | 29.3 | 85.0 | 28.5 | 6.7 | 5.7 |
| 28.5 | 6.8 | 4.5 | 29.7 | 83.6 | 29.7 | 6.8 | 5.1 |
| 27.5 | 6.7 | 4.8 | 29.9 | 83.8 | 27.7 | 6.7 | 5.0 |
| 29.3 | 6.8 | 5.0 | 28.7 | 85.2 | 29.9 | 6.7 | 5.1 |
| 27.7 | 6.8 | 5.1 | 27.6 | 83.9 | 27.4 | 6.6 | 5.2 |
| 28.8 | 6.8 | 5.3 | 27.6 | 85.1 | 27.6 | 6.6 | 5.7 |
| 31.5 | 6.9 | 4.2 | 27.9 | 83.1 | 27.0 | 6.6 | 5.9 |
| 27.5 | 6.7 | 4.8 | 29.9 | 83.8 | 27.7 | 6.7 | 5.0 |
| 30.4 | 6.7 | 4.2 | 28.8 | 83.8 | 28.2 | 6.7 | 5.3 |
| 30.8 | 6.8 | 4.5 | 29.5 | 87.6 | 28.7 | 6.7 | 5.2 |
| 30.5 | 6.8 | 5.0 | 27.9 | 83.5 | 28.2 | 6.6 | 5.1 |
| 28.4 | 6.8 | 5.4 | 29.2 | 80.8 | 28.9 | 6.7 | 5.4 |
| 27.5 | 6.7 | 4.8 | 29.9 | 83.8 | 27.7 | 6.7 | 5.0 |
| 28.4 | 6.7 | 4.8 | 29.9 | 87.8 | 30.0 | 6.8 | 5.0 |
| 28.4 | 6.8 | 4.7 | 29.0 | 82.7 | 28.9 | 6.7 | 4.8 |
| 28.3 | 6.8 | 4.5 | 30.9 | 84.8 | 29.2 | 6.8 | 4.5 |
| 30.7 | 6.8 | 4.1 | 31.3 | 87.2 | 30.8 | 6.9 | 4.6 |
| 27.5 | 6.7 | 4.8 | 29.9 | 83.8 | 27.7 | 6.7 | 5.0 |
| 27.0 | 6.7 | 4.9 | 29.9 | 83.9 | 28.3 | 6.7 | 4.8 |
| 22.9 | 6.4 | 4.4 | 28.1 | 84.7 | 28.2 | 6.7 | 4.7 |
| 30.1 | 6.9 | 4.6 | 29.8 | 82.5 | 30.1 | 6.8 | 4.9 |
| 29.9 | 6.8 | 4.1 | 30.1 | 83.5 | 30.2 | 6.8 | 4.8 |

|      |     |     |      |      |      |     |     |
|------|-----|-----|------|------|------|-----|-----|
| 27.5 | 6.7 | 4.8 | 29.9 | 83.8 | 27.7 | 6.7 | 5.0 |
| 29.7 | 6.8 | 4.5 | 30.4 | 86.1 | 30.2 | 6.8 | 4.4 |
| 32.1 | 6.8 | 4.2 | 30.1 | 84.0 | 30.2 | 6.8 | 5.1 |
| 28.5 | 6.8 | 4.9 | 29.6 | 82.1 | 30.2 | 6.8 | 4.9 |
| 28.2 | 6.7 | 5.1 | 31.1 | 83.7 | 32.6 | 6.9 | 4.7 |
| 28.4 | 6.8 | 5.1 | 29.1 | 83.9 | 28.9 | 6.7 | 4.7 |
| 27.3 | 6.7 | 5.8 | 28.5 | 85.4 | 29.7 | 6.7 | 4.8 |
| 28.3 | 6.7 | 5.8 | 27.7 | 84.0 | 27.4 | 6.7 | 5.6 |
| 29.7 | 6.8 | 4.3 | 30.5 | 87.8 | 29.4 | 6.8 | 4.8 |
| 29.9 | 6.8 | 4.4 | 31.1 | 86.4 | 30.2 | 6.9 | 5.4 |
| 28.4 | 6.8 | 5.1 | 29.1 | 83.9 | 28.9 | 6.7 | 4.7 |
| 29.2 | 6.7 | 5.3 | 29.1 | 84.8 | 32.8 | 6.8 | 4.9 |
| 29.3 | 6.7 | 5.2 | 27.6 | 83.5 | 29.4 | 6.7 | 4.9 |
| 31.0 | 6.7 | 4.5 | 32.1 | 85.5 | 32.8 | 6.8 | 4.5 |
| 29.7 | 6.7 | 4.4 | 28.5 | 79.5 | 30.7 | 6.7 | 4.8 |
| 28.4 | 6.8 | 5.1 | 29.1 | 83.9 | 28.9 | 6.7 | 4.7 |
| 27.7 | 6.7 | 5.1 | 29.5 | 81.9 | 30.5 | 6.8 | 5.0 |
| 29.7 | 6.8 | 4.5 | 29.9 | 85.7 | 33.3 | 6.8 | 3.8 |
| 29.1 | 6.8 | 4.7 | 30.1 | 85.2 | 30.1 | 6.7 | 4.9 |
| 30.7 | 6.8 | 4.3 | 30.9 | 83.8 | 29.9 | 6.8 | 5.1 |
| 28.4 | 6.8 | 5.1 | 29.1 | 83.9 | 28.9 | 6.7 | 4.7 |
| 27.8 | 6.8 | 4.4 | 29.2 | 86.1 | 28.7 | 6.7 | 4.6 |
| 26.8 | 6.7 | 5.9 | 26.6 | 82.3 | 26.0 | 6.5 | 5.7 |
| 27.9 | 6.7 | 5.2 | 28.1 | 85.5 | 28.3 | 6.6 | 4.9 |
| 27.9 | 6.7 | 5.1 | 26.9 | 86.0 | 26.8 | 6.5 | 4.9 |
| 28.4 | 6.8 | 5.1 | 29.1 | 83.9 | 28.9 | 6.7 | 4.7 |
| 29.3 | 6.8 | 4.1 | 30.1 | 86.7 | 28.8 | 6.8 | 4.6 |
| 29.9 | 6.8 | 4.0 | 29.1 | 84.9 | 28.3 | 6.8 | 5.2 |
| 28.2 | 6.6 | 4.8 | 28.3 | 83.3 | 30.3 | 6.7 | 4.3 |
| 28.9 | 6.8 | 4.9 | 29.0 | 86.8 | 31.1 | 6.7 | 4.7 |
| 28.4 | 6.8 | 5.1 | 29.1 | 83.9 | 28.9 | 6.7 | 4.7 |
| 29.7 | 6.7 | 4.6 | 30.1 | 85.9 | 30.9 | 6.8 | 4.6 |
| 26.6 | 6.7 | 4.8 | 29.6 | 83.1 | 28.4 | 6.7 | 4.4 |
| 31.3 | 6.8 | 4.2 | 28.1 | 81.6 | 29.3 | 6.7 | 4.5 |
| 29.3 | 6.7 | 3.9 | 29.2 | 86.5 | 27.6 | 6.7 | 4.7 |
| 28.4 | 6.8 | 5.1 | 29.1 | 83.9 | 28.9 | 6.7 | 4.7 |
| 26.5 | 6.7 | 4.5 | 30.2 | 85.0 | 28.8 | 6.7 | 4.5 |
| 24.4 | 6.4 | 4.3 | 28.0 | 84.4 | 27.7 | 6.7 | 5.3 |
| 27.3 | 6.7 | 4.9 | 28.2 | 85.5 | 29.4 | 6.6 | 4.3 |
| 30.0 | 6.9 | 4.5 | 30.1 | 84.4 | 29.4 | 6.8 | 4.8 |
| 28.4 | 6.8 | 5.1 | 29.1 | 83.9 | 28.9 | 6.7 | 4.7 |
| 29.4 | 6.9 | 5.1 | 30.3 | 86.3 | 30.8 | 6.8 | 4.9 |
| 29.8 | 6.8 | 4.8 | 31.8 | 85.6 | 31.0 | 6.7 | 4.5 |
| 28.1 | 6.8 | 4.8 | 27.9 | 83.4 | 28.6 | 6.7 | 4.3 |
| 28.4 | 6.7 | 4.6 | 30.0 | 85.9 | 31.1 | 6.8 | 4.2 |
| 28.4 | 6.8 | 5.1 | 29.1 | 83.9 | 28.9 | 6.7 | 4.7 |
| 29.4 | 6.7 | 4.0 | 30.9 | 85.9 | 28.9 | 6.7 | 4.8 |
| 31.0 | 6.8 | 4.3 | 29.3 | 84.6 | 30.4 | 6.7 | 4.6 |
| 29.4 | 6.9 | 5.2 | 30.5 | 86.7 | 28.9 | 6.8 | 5.3 |
| 28.9 | 6.8 | 4.9 | 30.9 | 87.3 | 30.6 | 6.8 | 5.2 |

|      |     |     |      |      |      |     |     |
|------|-----|-----|------|------|------|-----|-----|
| 28.4 | 6.8 | 5.1 | 29.1 | 83.9 | 28.9 | 6.7 | 4.7 |
| 27.3 | 6.7 | 4.8 | 28.8 | 83.2 | 27.7 | 6.6 | 4.6 |
| 27.9 | 6.9 | 5.3 | 30.7 | 85.4 | 31.8 | 6.8 | 4.5 |
| 29.6 | 6.8 | 4.6 | 29.8 | 85.8 | 30.0 | 6.7 | 5.1 |
| 28.7 | 6.7 | 5.2 | 28.4 | 85.6 | 28.2 | 6.6 | 5.3 |
| 28.1 | 6.7 | 3.9 | 29.3 | 86.1 | 28.0 | 6.7 | 5.5 |
| 28.1 | 6.7 | 4.7 | 28.6 | 86.1 | 26.8 | 6.7 | 5.5 |
| 29.8 | 6.8 | 4.8 | 28.2 | 83.9 | 27.6 | 6.7 | 4.8 |
| 29.4 | 6.8 | 5.0 | 28.7 | 85.7 | 27.0 | 6.7 | 5.8 |
| 29.7 | 6.8 | 5.1 | 29.6 | 85.3 | 29.5 | 6.7 | 5.6 |
| 30.5 | 6.9 | 5.0 | 28.4 | 85.4 | 27.8 | 6.6 | 5.6 |
| 28.1 | 6.7 | 4.7 | 28.6 | 86.1 | 26.8 | 6.7 | 5.5 |
| 28.4 | 6.8 | 4.7 | 29.0 | 85.9 | 28.3 | 6.7 | 5.3 |
| 28.7 | 6.9 | 5.1 | 29.1 | 84.5 | 28.1 | 6.6 | 4.8 |
| 27.0 | 6.8 | 5.2 | 27.5 | 82.2 | 27.9 | 6.7 | 5.7 |
| 27.6 | 6.8 | 4.9 | 27.2 | 84.3 | 25.9 | 6.6 | 5.1 |
| 28.1 | 6.7 | 4.7 | 28.6 | 86.1 | 26.8 | 6.7 | 5.5 |
| 29.8 | 6.9 | 4.5 | 29.2 | 88.0 | 27.0 | 6.7 | 5.4 |
| 27.8 | 6.9 | 5.1 | 27.4 | 86.0 | 26.2 | 6.6 | 5.1 |
| 28.5 | 6.9 | 5.5 | 29.8 | 85.4 | 29.7 | 6.8 | 4.8 |
| 28.7 | 6.8 | 5.1 | 28.1 | 85.5 | 27.4 | 6.6 | 5.4 |
| 28.1 | 6.7 | 4.7 | 28.6 | 86.1 | 26.8 | 6.7 | 5.5 |
| 27.6 | 6.8 | 4.8 | 30.2 | 86.3 | 29.7 | 6.8 | 5.0 |
| 29.5 | 7.0 | 5.2 | 30.1 | 85.5 | 29.7 | 6.8 | 5.7 |
| 29.4 | 6.8 | 4.6 | 28.7 | 85.1 | 27.0 | 6.6 | 5.6 |
| 30.6 | 6.9 | 5.0 | 29.1 | 84.5 | 28.8 | 6.7 | 5.5 |
| 28.1 | 6.7 | 4.7 | 28.6 | 86.1 | 26.8 | 6.7 | 5.5 |
| 29.8 | 6.8 | 4.4 | 30.2 | 85.7 | 30.6 | 6.8 | 4.5 |
| 29.7 | 6.8 | 4.6 | 29.0 | 85.5 | 31.5 | 6.8 | 4.8 |
| 29.4 | 6.8 | 4.3 | 28.9 | 85.2 | 27.0 | 6.7 | 5.2 |
| 28.0 | 6.9 | 5.2 | 27.8 | 83.8 | 28.1 | 6.7 | 4.9 |
| 28.1 | 6.7 | 4.7 | 28.6 | 86.1 | 26.8 | 6.7 | 5.5 |
| 28.3 | 6.8 | 4.7 | 29.5 | 85.6 | 29.2 | 6.7 | 4.8 |
| 30.1 | 6.8 | 4.3 | 29.1 | 83.7 | 27.9 | 6.7 | 4.5 |
| 27.7 | 6.8 | 4.6 | 27.0 | 84.3 | 25.3 | 6.6 | 5.0 |
| 26.7 | 6.7 | 5.3 | 26.5 | 84.4 | 25.7 | 6.6 | 5.1 |
| 28.1 | 6.7 | 4.7 | 28.6 | 86.1 | 26.8 | 6.7 | 5.5 |
| 27.4 | 6.8 | 5.1 | 28.9 | 85.0 | 28.5 | 6.7 | 4.9 |
| 30.3 | 6.8 | 5.4 | 29.4 | 85.2 | 29.3 | 6.8 | 5.1 |
| 31.4 | 7.0 | 4.5 | 31.5 | 85.9 | 32.0 | 6.9 | 4.7 |
| 28.8 | 6.8 | 4.7 | 30.3 | 86.9 | 28.4 | 6.8 | 4.8 |
| 28.1 | 6.7 | 4.7 | 28.6 | 86.1 | 26.8 | 6.7 | 5.5 |
| 30.7 | 6.8 | 4.5 | 30.8 | 85.4 | 29.9 | 6.8 | 5.0 |
| 32.6 | 6.9 | 4.0 | 29.4 | 84.0 | 32.3 | 6.7 | 3.9 |
| 30.1 | 6.8 | 4.8 | 27.3 | 83.0 | 29.2 | 6.7 | 4.9 |
| 30.3 | 6.9 | 4.7 | 28.0 | 82.0 | 28.9 | 6.7 | 4.6 |
| 28.1 | 6.7 | 4.7 | 28.6 | 86.1 | 26.8 | 6.7 | 5.5 |
| 30.7 | 6.9 | 4.5 | 28.1 | 82.9 | 29.9 | 6.6 | 3.7 |
| 29.6 | 6.8 | 3.2 | 29.4 | 83.4 | 29.1 | 6.7 | 4.7 |
| 30.5 | 6.8 | 4.5 | 29.1 | 84.6 | 32.1 | 6.8 | 5.0 |

|      |     |     |      |      |      |     |     |
|------|-----|-----|------|------|------|-----|-----|
| 29.7 | 6.8 | 3.8 | 29.5 | 85.8 | 31.0 | 6.8 | 4.8 |
| 28.1 | 6.7 | 4.7 | 28.6 | 86.1 | 26.8 | 6.7 | 5.5 |
| 31.4 | 7.0 | 4.4 | 28.5 | 81.3 | 28.9 | 6.7 | 4.6 |
| 31.0 | 6.9 | 4.2 | 30.7 | 86.4 | 35.4 | 7.0 | 4.1 |
| 29.6 | 6.7 | 3.5 | 29.4 | 86.0 | 29.3 | 6.8 | 4.6 |
| 30.3 | 6.9 | 4.3 | 28.4 | 84.9 | 27.7 | 6.7 | 5.0 |
| 29.3 | 6.8 | 5.0 | 28.4 | 85.7 | 27.8 | 6.7 | 4.9 |
| 29.6 | 6.9 | 4.8 | 28.4 | 85.0 | 28.4 | 6.7 | 5.0 |
| 31.4 | 7.0 | 4.9 | 29.8 | 87.6 | 30.7 | 6.8 | 4.8 |
| 30.2 | 6.9 | 5.0 | 30.3 | 87.0 | 29.8 | 6.8 | 5.0 |
| 29.7 | 6.8 | 4.6 | 29.5 | 85.8 | 31.0 | 6.8 | 4.6 |
| 29.3 | 6.8 | 5.0 | 28.4 | 85.7 | 27.8 | 6.7 | 4.9 |
| 28.0 | 6.9 | 5.1 | 28.2 | 84.1 | 28.2 | 6.7 | 4.7 |
| 29.1 | 6.8 | 5.0 | 28.8 | 84.6 | 28.8 | 6.8 | 5.1 |
| 27.4 | 6.9 | 5.0 | 28.4 | 84.4 | 28.0 | 6.7 | 4.7 |
| 29.1 | 6.8 | 5.3 | 29.2 | 84.4 | 28.0 | 6.7 | 5.0 |
| 29.3 | 6.8 | 5.0 | 28.4 | 85.7 | 27.8 | 6.7 | 4.9 |
| 28.9 | 6.8 | 4.9 | 26.7 | 81.6 | 26.9 | 6.6 | 4.9 |
| 29.1 | 6.9 | 5.3 | 29.0 | 85.1 | 30.0 | 6.8 | 4.8 |
| 28.7 | 6.9 | 4.6 | 30.5 | 85.9 | 29.6 | 6.8 | 4.6 |
| 28.7 | 6.9 | 4.6 | 27.2 | 83.6 | 28.1 | 6.6 | 4.4 |
| 29.3 | 6.8 | 5.0 | 28.4 | 85.7 | 27.8 | 6.7 | 4.9 |
| 28.8 | 6.9 | 4.5 | 29.6 | 84.0 | 30.3 | 6.8 | 4.5 |
| 29.8 | 6.9 | 4.3 | 29.2 | 83.7 | 28.8 | 6.7 | 4.2 |
| 29.0 | 6.9 | 4.6 | 29.0 | 85.5 | 30.0 | 6.7 | 4.8 |
| 30.4 | 6.8 | 4.0 | 28.7 | 86.2 | 28.3 | 6.7 | 4.8 |
| 29.3 | 6.8 | 5.0 | 28.4 | 85.7 | 27.8 | 6.7 | 4.9 |
| 28.3 | 6.9 | 5.3 | 28.4 | 85.7 | 27.8 | 6.7 | 5.1 |
| 30.1 | 6.8 | 4.8 | 26.1 | 85.1 | 27.1 | 6.6 | 5.6 |
| 27.0 | 6.6 | 5.9 | 24.2 | 82.8 | 23.9 | 6.3 | 5.9 |
| 27.5 | 6.7 | 5.7 | 29.2 | 86.9 | 28.4 | 6.7 | 5.0 |
| 29.3 | 6.8 | 5.0 | 28.4 | 85.7 | 27.8 | 6.7 | 4.9 |
| 28.8 | 6.8 | 4.9 | 30.3 | 87.1 | 28.8 | 6.8 | 5.4 |
| 29.9 | 7.0 | 5.3 | 28.3 | 83.5 | 29.0 | 6.7 | 5.5 |
| 30.0 | 6.6 | 4.5 | 28.8 | 84.0 | 29.7 | 6.6 | 4.5 |
| 30.5 | 6.8 | 4.9 | 30.0 | 86.4 | 29.3 | 6.7 | 4.9 |
| 29.3 | 6.8 | 5.0 | 28.4 | 85.7 | 27.8 | 6.7 | 4.9 |
| 29.4 | 6.7 | 4.6 | 28.8 | 86.1 | 27.7 | 6.7 | 4.8 |
| 27.0 | 6.7 | 4.6 | 25.0 | 80.1 | 24.7 | 6.5 | 5.4 |
| 29.9 | 6.8 | 4.6 | 28.8 | 83.7 | 28.7 | 6.6 | 5.1 |
| 29.7 | 6.8 | 4.8 | 28.0 | 85.4 | 28.3 | 6.7 | 5.2 |
| 29.3 | 6.8 | 5.0 | 28.4 | 85.7 | 27.8 | 6.7 | 4.9 |
| 28.3 | 6.9 | 5.0 | 29.2 | 87.3 | 27.0 | 6.7 | 5.6 |
| 26.9 | 6.7 | 4.9 | 29.2 | 84.5 | 30.0 | 6.7 | 5.2 |
| 27.4 | 6.8 | 5.3 | 25.7 | 82.9 | 25.5 | 6.5 | 5.7 |
| 26.5 | 6.8 | 5.2 | 26.9 | 84.9 | 28.0 | 6.6 | 5.6 |
| 29.3 | 6.8 | 5.0 | 28.4 | 85.7 | 27.8 | 6.7 | 4.9 |
| 28.0 | 6.7 | 4.9 | 28.1 | 85.1 | 28.2 | 6.7 | 4.8 |
| 29.1 | 6.8 | 5.1 | 28.7 | 85.9 | 29.3 | 6.7 | 4.6 |
| 29.7 | 6.9 | 4.7 | 30.3 | 85.3 | 29.9 | 6.8 | 4.9 |



|      |     |     |      |      |      |     |     |
|------|-----|-----|------|------|------|-----|-----|
| 29.7 | 6.8 | 4.1 | 29.2 | 85.1 | 28.4 | 6.7 | 5.0 |
| 29.3 | 6.8 | 5.0 | 28.4 | 85.7 | 27.8 | 6.7 | 4.9 |
| 28.0 | 6.8 | 4.9 | 28.9 | 86.5 | 27.7 | 6.8 | 5.5 |
| 27.5 | 6.7 | 5.3 | 28.1 | 84.8 | 26.6 | 6.7 | 5.5 |
| 28.4 | 6.7 | 4.6 | 27.3 | 84.7 | 26.2 | 6.6 | 5.7 |
| 30.4 | 6.7 | 4.5 | 28.4 | 85.8 | 27.5 | 6.7 | 5.3 |
| 25.8 | 6.6 | 4.1 | 28.5 | 86.2 | 27.1 | 6.7 | 5.0 |
| 28.6 | 6.8 | 5.0 | 29.1 | 87.6 | 28.4 | 6.7 | 4.9 |
| 27.1 | 6.9 | 5.9 | 28.9 | 87.6 | 27.2 | 6.8 | 5.7 |
| 30.2 | 6.9 | 5.0 | 30.6 | 87.5 | 29.3 | 6.8 | 5.0 |
| 30.5 | 6.9 | 4.6 | 30.2 | 86.3 | 28.5 | 6.7 | 5.2 |
| 25.8 | 6.6 | 4.1 | 28.5 | 86.2 | 27.1 | 6.7 | 5.0 |
| 28.7 | 6.7 | 4.9 | 29.6 | 85.5 | 28.4 | 6.7 | 4.5 |
| 27.8 | 6.7 | 5.0 | 26.8 | 84.2 | 25.7 | 6.6 | 5.1 |
| 33.6 | 6.9 | 5.1 | 29.3 | 85.3 | 29.2 | 6.7 | 5.7 |
| 31.2 | 6.8 | 4.8 | 29.7 | 86.1 | 29.3 | 6.7 | 5.1 |
| 25.8 | 6.6 | 4.1 | 28.5 | 86.2 | 27.1 | 6.7 | 5.0 |
| 31.5 | 6.8 | 4.5 | 27.8 | 82.9 | 27.3 | 6.6 | 5.0 |
| 30.1 | 6.8 | 3.3 | 25.8 | 82.3 | 24.1 | 6.5 | 4.9 |
| 30.2 | 6.8 | 3.6 | 27.1 | 84.4 | 27.5 | 6.6 | 4.7 |
| 29.3 | 6.8 | 4.3 | 29.5 | 86.6 | 28.1 | 6.7 | 4.5 |
| 25.8 | 6.6 | 4.1 | 28.5 | 86.2 | 27.1 | 6.7 | 5.0 |
| 29.4 | 6.8 | 5.3 | 28.5 | 85.6 | 29.0 | 6.7 | 5.0 |
| 31.3 | 6.8 | 5.2 | 30.3 | 86.9 | 29.4 | 6.8 | 4.8 |
| 31.7 | 6.8 | 5.1 | 29.2 | 85.3 | 28.6 | 6.7 | 5.3 |
| 31.6 | 6.9 | 4.5 | 28.5 | 85.3 | 28.2 | 6.6 | 4.7 |
| 25.8 | 6.6 | 4.1 | 28.5 | 86.2 | 27.1 | 6.7 | 5.0 |
| 30.3 | 6.9 | 5.0 | 29.4 | 85.7 | 28.1 | 6.7 | 4.8 |
| 30.1 | 6.9 | 4.8 | 29.2 | 84.4 | 28.4 | 6.7 | 4.6 |
| 30.6 | 7.0 | 4.8 | 30.4 | 85.2 | 29.7 | 6.7 | 4.4 |
| 31.0 | 7.0 | 5.1 | 28.3 | 83.8 | 28.5 | 6.6 | 4.9 |
| 25.8 | 6.6 | 4.1 | 28.5 | 86.2 | 27.1 | 6.7 | 5.0 |
| 29.1 | 6.9 | 4.9 | 28.9 | 84.7 | 27.0 | 6.7 | 5.0 |
| 27.5 | 6.8 | 4.7 | 28.7 | 84.8 | 28.3 | 6.7 | 4.8 |
| 28.7 | 6.7 | 5.4 | 28.4 | 85.4 | 28.0 | 6.6 | 5.3 |
| 29.5 | 6.8 | 5.1 | 29.6 | 87.9 | 28.0 | 6.7 | 5.4 |
| 25.8 | 6.6 | 4.1 | 28.5 | 86.2 | 27.1 | 6.7 | 5.0 |
| 30.4 | 6.9 | 4.9 | 30.0 | 86.3 | 30.3 | 6.8 | 4.9 |
| 30.1 | 6.8 | 5.0 | 29.9 | 81.4 | 29.8 | 6.8 | 5.3 |
| 27.0 | 6.7 | 4.3 | 26.3 | 84.3 | 25.8 | 6.6 | 4.8 |
| 27.9 | 6.9 | 5.1 | 28.1 | 86.7 | 27.1 | 6.7 | 5.0 |
| 25.8 | 6.6 | 4.1 | 28.5 | 86.2 | 27.1 | 6.7 | 5.0 |
| 28.6 | 6.8 | 5.4 | 28.9 | 85.3 | 29.7 | 6.8 | 5.2 |
| 31.4 | 6.8 | 3.3 | 29.4 | 85.4 | 28.2 | 6.7 | 5.1 |
| 31.7 | 6.9 | 4.5 | 30.4 | 87.3 | 28.9 | 6.7 | 5.1 |
| 26.9 | 6.7 | 5.1 | 29.1 | 86.6 | 28.6 | 6.7 | 4.7 |
| 25.8 | 6.6 | 4.1 | 28.5 | 86.2 | 27.1 | 6.7 | 5.0 |
| 28.9 | 6.8 | 4.0 | 30.1 | 86.2 | 28.0 | 6.7 | 5.0 |
| 31.5 | 6.8 | 3.8 | 31.5 | 86.8 | 29.0 | 6.8 | 5.5 |
| 30.9 | 6.8 | 4.5 | 26.7 | 83.2 | 25.6 | 6.5 | 4.9 |

|      |     |     |      |      |      |     |     |
|------|-----|-----|------|------|------|-----|-----|
| 29.4 | 6.7 | 4.6 | 28.5 | 85.7 | 28.3 | 6.7 | 4.9 |
| 25.8 | 6.6 | 4.1 | 28.5 | 86.2 | 27.1 | 6.7 | 5.0 |
| 28.1 | 6.9 | 4.7 | 28.1 | 84.3 | 27.7 | 6.7 | 5.0 |
| 29.9 | 6.8 | 4.5 | 29.6 | 81.7 | 30.7 | 6.7 | 4.5 |
| 29.2 | 6.8 | 4.9 | 29.1 | 86.4 | 29.6 | 6.7 | 4.4 |
| 30.3 | 6.9 | 4.2 | 28.2 | 82.6 | 31.2 | 6.8 | 4.4 |
| 29.9 | 6.9 | 5.3 | 28.0 | 85.0 | 27.0 | 6.6 | 4.3 |
| 29.3 | 6.8 | 5.0 | 28.4 | 84.7 | 28.9 | 6.7 | 4.9 |
| 28.3 | 6.7 | 4.7 | 28.1 | 83.3 | 28.1 | 6.7 | 5.5 |
| 29.7 | 6.8 | 5.2 | 28.7 | 83.8 | 29.4 | 6.7 | 4.7 |
| 30.5 | 6.9 | 4.8 | 29.6 | 86.0 | 27.5 | 6.7 | 4.9 |
| 29.9 | 6.9 | 5.3 | 28.0 | 85.0 | 27.0 | 6.6 | 4.3 |
| 30.2 | 6.9 | 5.1 | 27.2 | 85.3 | 27.0 | 6.6 | 5.5 |
| 29.3 | 6.8 | 5.4 | 26.2 | 85.4 | 26.2 | 6.5 | 5.5 |
| 28.7 | 6.8 | 5.3 | 29.4 | 85.9 | 29.3 | 6.7 | 5.8 |
| 28.2 | 6.9 | 5.5 | 28.8 | 86.4 | 28.7 | 6.7 | 5.1 |
| 29.9 | 6.9 | 5.3 | 28.0 | 85.0 | 27.0 | 6.6 | 4.3 |
| 28.4 | 6.8 | 5.0 | 28.8 | 86.6 | 30.0 | 6.8 | 5.2 |
| 28.0 | 6.8 | 5.5 | 29.1 | 86.5 | 28.0 | 6.7 | 5.2 |
| 26.2 | 6.6 | 5.2 | 28.8 | 87.0 | 28.2 | 6.7 | 5.8 |
| 29.1 | 6.8 | 5.0 | 28.2 | 86.3 | 27.9 | 6.7 | 5.4 |
| 29.9 | 6.9 | 5.3 | 28.0 | 85.0 | 27.0 | 6.6 | 4.3 |
| 28.3 | 6.8 | 5.0 | 29.7 | 86.0 | 29.8 | 6.7 | 4.5 |
| 29.7 | 6.9 | 5.4 | 29.2 | 83.7 | 31.2 | 6.7 | 4.4 |
| 27.9 | 6.7 | 4.7 | 29.1 | 83.0 | 31.1 | 6.7 | 4.2 |
| 27.8 | 6.7 | 5.0 | 29.0 | 85.4 | 29.8 | 6.7 | 4.1 |
| 29.9 | 6.9 | 5.3 | 28.0 | 85.0 | 27.0 | 6.6 | 4.3 |
| 27.7 | 6.7 | 4.9 | 29.8 | 86.0 | 29.3 | 6.7 | 4.8 |
| 30.3 | 6.7 | 5.0 | 29.2 | 84.2 | 30.2 | 6.7 | 4.5 |
| 28.4 | 6.7 | 5.0 | 29.3 | 86.1 | 29.7 | 6.8 | 5.2 |
| 28.3 | 6.8 | 5.1 | 29.5 | 85.7 | 29.8 | 6.7 | 5.5 |
| 29.9 | 6.9 | 5.3 | 28.0 | 85.0 | 27.0 | 6.6 | 4.3 |
| 29.4 | 6.9 | 5.7 | 29.5 | 86.9 | 31.4 | 6.7 | 4.3 |
| 30.7 | 6.8 | 5.3 | 29.9 | 85.9 | 28.8 | 6.7 | 5.4 |
| 29.3 | 6.8 | 4.1 | 30.8 | 84.5 | 28.7 | 6.7 | 4.4 |
| 29.2 | 6.8 | 4.0 | 29.6 | 85.8 | 30.6 | 6.8 | 4.1 |
| 29.9 | 6.9 | 5.3 | 28.0 | 85.0 | 27.0 | 6.6 | 4.3 |
| 28.5 | 6.8 | 4.9 | 29.9 | 85.6 | 30.1 | 6.8 | 4.9 |
| 28.8 | 6.9 | 5.3 | 28.7 | 84.3 | 26.6 | 6.7 | 5.4 |
| 28.5 | 6.8 | 4.9 | 28.8 | 84.3 | 29.7 | 6.7 | 3.4 |
| 29.6 | 6.8 | 3.9 | 29.3 | 86.2 | 29.0 | 6.8 | 5.0 |
| 29.9 | 6.9 | 5.3 | 28.0 | 85.0 | 27.0 | 6.6 | 4.3 |
| 30.2 | 6.8 | 3.7 | 29.3 | 82.5 | 29.1 | 6.7 | 4.6 |
| 27.3 | 6.7 | 5.0 | 29.7 | 84.9 | 29.2 | 6.7 | 4.9 |
| 28.8 | 6.6 | 4.6 | 29.8 | 84.6 | 31.0 | 6.7 | 4.5 |
| 29.1 | 6.8 | 4.7 | 29.8 | 85.3 | 30.3 | 6.7 | 4.8 |
| 29.9 | 6.9 | 5.3 | 28.0 | 85.0 | 27.0 | 6.6 | 4.3 |
| 28.3 | 6.8 | 4.9 | 30.0 | 85.4 | 29.5 | 6.8 | 5.3 |
| 27.5 | 6.7 | 4.1 | 28.8 | 85.8 | 28.7 | 6.7 | 4.7 |
| 28.3 | 6.8 | 4.7 | 29.5 | 85.7 | 29.7 | 6.7 | 4.6 |

|      |     |     |      |      |      |     |     |
|------|-----|-----|------|------|------|-----|-----|
| 28.8 | 6.8 | 4.6 | 29.1 | 84.3 | 28.3 | 6.7 | 5.1 |
| 29.9 | 6.9 | 5.3 | 28.0 | 85.0 | 27.0 | 6.6 | 4.3 |
| 29.1 | 6.7 | 4.8 | 29.8 | 85.4 | 31.9 | 6.8 | 4.1 |
| 30.9 | 6.9 | 4.8 | 29.1 | 84.4 | 29.7 | 6.7 | 5.1 |
| 29.6 | 6.8 | 3.2 | 26.5 | 83.7 | 26.5 | 6.6 | 5.9 |
| 27.9 | 6.8 | 5.5 | 28.7 | 85.3 | 28.2 | 6.7 | 4.9 |
| 29.4 | 6.9 | 4.9 | 28.4 | 85.3 | 28.6 | 6.7 | 4.7 |
| 29.3 | 6.9 | 5.3 | 29.5 | 87.0 | 29.3 | 6.7 | 5.0 |
| 28.5 | 6.9 | 5.8 | 29.6 | 85.6 | 29.3 | 6.8 | 5.0 |
| 30.2 | 6.9 | 5.2 | 31.3 | 85.9 | 31.1 | 6.8 | 5.1 |
| 28.8 | 6.8 | 5.1 | 30.0 | 85.5 | 30.1 | 6.8 | 5.1 |
| 29.4 | 6.9 | 4.9 | 28.4 | 85.3 | 28.6 | 6.7 | 4.7 |
| 29.3 | 6.9 | 5.0 | 29.4 | 85.6 | 28.6 | 6.8 | 5.7 |
| 27.9 | 6.9 | 5.6 | 27.1 | 82.4 | 27.6 | 6.6 | 5.3 |
| 30.5 | 6.9 | 5.4 | 30.0 | 84.7 | 29.1 | 6.8 | 5.5 |
| 28.4 | 6.9 | 5.4 | 30.3 | 85.9 | 31.9 | 6.8 | 4.2 |
| 29.4 | 6.9 | 4.9 | 28.4 | 85.3 | 28.6 | 6.7 | 4.7 |
| 30.6 | 6.8 | 4.9 | 29.1 | 82.9 | 28.6 | 6.8 | 5.8 |
| 28.5 | 6.9 | 5.7 | 27.0 | 83.0 | 27.0 | 6.6 | 5.5 |
| 29.6 | 6.8 | 5.4 | 29.3 | 85.3 | 29.1 | 6.8 | 5.9 |
| 30.2 | 6.8 | 5.0 | 29.3 | 85.8 | 27.4 | 6.6 | 4.5 |
| 29.4 | 6.9 | 4.9 | 28.4 | 85.3 | 28.6 | 6.7 | 4.7 |
| 31.5 | 6.9 | 4.6 | 31.1 | 86.5 | 32.0 | 6.8 | 4.8 |
| 33.6 | 6.9 | 4.1 | 32.3 | 85.1 | 33.2 | 6.8 | 4.1 |
| 27.4 | 6.7 | 4.9 | 28.3 | 82.6 | 27.7 | 6.7 | 5.3 |
| 31.1 | 6.9 | 4.6 | 28.1 | 82.7 | 25.5 | 6.6 | 4.7 |
| 29.4 | 6.9 | 4.9 | 28.4 | 85.3 | 28.6 | 6.7 | 4.7 |
| 29.0 | 6.8 | 5.3 | 29.1 | 85.9 | 28.6 | 6.7 | 4.3 |
| 29.1 | 6.8 | 5.1 | 31.2 | 85.5 | 29.7 | 6.8 | 5.0 |
| 28.2 | 6.7 | 4.8 | 28.4 | 82.8 | 27.7 | 6.7 | 5.5 |
| 29.4 | 6.9 | 4.9 | 28.4 | 85.3 | 28.6 | 6.7 | 4.7 |
| 29.0 | 6.8 | 4.5 | 30.1 | 86.0 | 31.1 | 6.7 | 4.3 |
| 31.7 | 6.8 | 4.6 | 31.4 | 85.4 | 30.2 | 6.8 | 5.3 |
| 27.6 | 6.9 | 5.3 | 30.1 | 84.3 | 29.0 | 6.7 | 4.1 |
| 29.4 | 6.7 | 3.8 | 28.3 | 82.9 | 26.4 | 6.6 | 4.5 |
| 29.4 | 6.9 | 4.9 | 28.4 | 85.3 | 28.6 | 6.7 | 4.7 |
| 29.6 | 6.8 | 4.8 | 30.1 | 87.0 | 29.7 | 6.8 | 4.8 |
| 27.8 | 6.8 | 5.5 | 28.6 | 86.2 | 27.7 | 6.7 | 4.8 |
| 30.9 | 6.9 | 4.7 | 28.4 | 85.0 | 31.3 | 6.8 | 5.1 |
| 27.0 | 6.7 | 5.4 | 30.0 | 87.2 | 29.6 | 6.8 | 5.5 |
| 29.4 | 6.9 | 4.9 | 28.4 | 85.3 | 28.6 | 6.7 | 4.7 |
| 28.5 | 6.9 | 5.2 | 29.2 | 85.3 | 28.1 | 6.7 | 4.9 |
| 31.9 | 7.0 | 4.7 | 28.6 | 82.0 | 29.1 | 6.7 | 4.5 |
| 29.6 | 6.7 | 4.6 | 27.7 | 82.1 | 26.8 | 6.6 | 5.1 |
| 27.3 | 6.7 | 4.7 | 30.2 | 86.0 | 28.6 | 6.7 | 5.0 |
| 29.4 | 6.9 | 4.9 | 28.4 | 85.3 | 28.6 | 6.7 | 4.7 |
| 28.2 | 6.8 | 4.7 | 29.2 | 85.1 | 26.9 | 6.6 | 5.1 |
| 28.0 | 6.7 | 4.2 | 29.9 | 86.4 | 27.5 | 6.7 | 5.6 |
| 30.0 | 6.8 | 4.7 | 27.1 | 82.7 | 28.8 | 6.6 | 5.1 |
| 27.0 | 6.5 | 4.3 | 28.2 | 84.1 | 27.6 | 6.6 | 4.8 |

|      |     |     |      |      |      |     |     |
|------|-----|-----|------|------|------|-----|-----|
| 29.4 | 6.9 | 4.9 | 28.4 | 85.3 | 28.6 | 6.7 | 4.7 |
| 27.7 | 6.8 | 5.4 | 27.8 | 83.6 | 27.6 | 6.6 | 4.9 |
| 28.2 | 6.8 | 4.3 | 28.8 | 84.7 | 27.3 | 6.6 | 5.5 |
| 28.2 | 6.8 | 4.7 | 28.9 | 84.3 | 28.6 | 6.7 | 5.4 |
| 27.4 | 6.8 | 5.3 | 30.5 | 86.9 | 30.9 | 6.9 | 5.4 |
| 29.8 | 6.7 | 3.8 | 27.6 | 84.8 | 28.0 | 6.6 | 5.3 |
| 30.9 | 6.8 | 4.2 | 31.0 | 85.9 | 31.2 | 6.8 | 4.4 |
| 30.2 | 6.9 | 5.4 | 30.6 | 86.9 | 29.7 | 6.8 | 5.2 |
| 31.2 | 6.9 | 5.4 | 32.3 | 86.8 | 31.1 | 6.9 | 5.0 |
| 31.7 | 6.9 | 4.2 | 31.3 | 86.5 | 29.8 | 6.9 | 4.8 |
| 29.8 | 6.7 | 3.8 | 27.6 | 84.8 | 28.0 | 6.6 | 5.3 |
| 30.2 | 6.8 | 4.8 | 31.1 | 85.6 | 29.3 | 6.8 | 4.9 |
| 32.5 | 6.9 | 3.5 | 31.0 | 86.0 | 32.3 | 7.0 | 4.7 |
| 30.8 | 6.8 | 4.2 | 30.4 | 86.3 | 32.2 | 6.8 | 4.6 |
| 29.3 | 6.8 | 5.4 | 29.7 | 85.3 | 29.2 | 6.8 | 4.7 |
| 29.8 | 6.7 | 3.8 | 27.6 | 84.8 | 28.0 | 6.6 | 5.3 |
| 28.0 | 6.8 | 4.8 | 31.0 | 85.2 | 28.9 | 6.8 | 5.1 |
| 29.4 | 6.8 | 4.7 | 30.5 | 87.3 | 30.4 | 6.8 | 5.2 |
| 31.0 | 6.7 | 4.8 | 27.7 | 84.9 | 30.0 | 6.7 | 5.7 |
| 28.8 | 6.8 | 4.7 | 29.6 | 85.2 | 29.5 | 6.8 | 5.2 |
| 29.8 | 6.7 | 3.8 | 27.6 | 84.8 | 28.0 | 6.6 | 5.3 |
| 30.5 | 6.7 | 3.7 | 31.1 | 86.4 | 30.2 | 6.9 | 4.9 |
| 27.6 | 6.8 | 5.2 | 30.2 | 84.6 | 30.0 | 6.8 | 4.6 |
| 30.2 | 6.9 | 4.6 | 30.1 | 86.5 | 29.2 | 6.7 | 4.4 |
| 30.2 | 6.8 | 4.2 | 29.3 | 86.3 | 29.5 | 6.8 | 5.0 |
| 29.8 | 6.7 | 3.8 | 27.6 | 84.8 | 28.0 | 6.6 | 5.3 |
| 27.6 | 6.8 | 5.3 | 29.9 | 86.7 | 29.2 | 6.8 | 5.2 |
| 31.1 | 6.8 | 5.1 | 27.6 | 84.3 | 29.0 | 6.7 | 5.6 |
| 28.4 | 6.9 | 5.0 | 30.0 | 86.5 | 31.4 | 6.8 | 4.5 |
| 29.5 | 6.8 | 4.0 | 30.0 | 85.9 | 31.0 | 6.9 | 5.0 |
| 29.8 | 6.7 | 3.8 | 27.6 | 84.8 | 28.0 | 6.6 | 5.3 |
| 27.9 | 6.8 | 5.0 | 29.0 | 84.0 | 28.5 | 6.7 | 5.0 |
| 29.9 | 6.9 | 4.7 | 28.7 | 85.4 | 31.0 | 6.9 | 5.0 |
| 28.3 | 6.8 | 5.3 | 28.7 | 83.7 | 29.5 | 6.7 | 4.9 |
| 29.4 | 6.9 | 4.8 | 28.4 | 83.9 | 28.3 | 6.7 | 5.4 |
| 29.8 | 6.7 | 3.8 | 27.6 | 84.8 | 28.0 | 6.6 | 5.3 |
| 28.5 | 6.8 | 5.2 | 28.6 | 84.3 | 29.5 | 6.8 | 5.2 |
| 30.3 | 6.8 | 4.6 | 30.5 | 85.4 | 28.9 | 6.8 | 5.1 |
| 30.1 | 6.9 | 4.6 | 29.8 | 83.7 | 29.1 | 6.8 | 4.9 |
| 30.4 | 7.0 | 4.7 | 29.9 | 85.0 | 30.4 | 6.8 | 4.6 |
| 29.8 | 6.7 | 3.8 | 27.6 | 84.8 | 28.0 | 6.6 | 5.3 |
| 29.4 | 6.8 | 3.9 | 30.0 | 85.5 | 28.6 | 6.8 | 5.1 |
| 28.1 | 6.6 | 4.2 | 29.8 | 85.2 | 28.9 | 6.8 | 4.9 |
| 27.7 | 6.9 | 5.3 | 28.9 | 85.3 | 27.4 | 6.7 | 5.3 |
| 27.8 | 6.8 | 4.8 | 29.9 | 84.5 | 28.5 | 6.8 | 5.1 |
| 29.8 | 6.7 | 3.8 | 27.6 | 84.8 | 28.0 | 6.6 | 5.3 |
| 30.6 | 6.9 | 4.7 | 29.8 | 85.0 | 29.9 | 6.8 | 5.1 |
| 30.9 | 6.8 | 4.6 | 28.3 | 84.9 | 27.0 | 6.6 | 5.4 |
| 30.9 | 6.8 | 4.4 | 30.9 | 85.7 | 31.3 | 6.8 | 4.2 |
| 28.4 | 6.8 | 4.9 | 30.5 | 86.2 | 29.7 | 6.8 | 4.9 |

|      |     |     |      |      |      |     |     |
|------|-----|-----|------|------|------|-----|-----|
| 29.8 | 6.7 | 3.8 | 27.6 | 84.8 | 28.0 | 6.6 | 5.3 |
| 30.4 | 6.8 | 4.6 | 29.7 | 84.1 | 31.9 | 6.8 | 4.6 |
| 26.1 | 6.6 | 5.2 | 29.0 | 85.2 | 28.8 | 6.7 | 4.8 |
| 28.5 | 6.8 | 4.8 | 30.2 | 87.3 | 30.7 | 6.8 | 4.7 |
| 27.9 | 6.8 | 5.2 | 30.3 | 88.0 | 29.2 | 6.8 | 4.7 |
| 29.4 | 6.7 | 3.5 | 29.4 | 85.8 | 28.8 | 6.7 | 5.3 |
| 29.6 | 6.8 | 4.8 | 30.9 | 87.4 | 29.9 | 6.8 | 5.1 |
| 31.4 | 6.9 | 4.7 | 29.0 | 83.7 | 29.0 | 6.7 | 5.5 |
| 26.3 | 6.6 | 5.1 | 29.4 | 85.6 | 28.0 | 6.7 | 5.5 |
| 29.2 | 6.9 | 5.4 | 30.3 | 85.3 | 29.8 | 6.8 | 5.1 |
| 29.4 | 6.7 | 3.5 | 29.4 | 85.8 | 28.8 | 6.7 | 5.3 |
| 29.1 | 6.9 | 5.2 | 29.6 | 83.7 | 29.4 | 6.8 | 5.4 |
| 29.1 | 6.7 | 4.0 | 27.1 | 80.9 | 26.4 | 6.6 | 5.6 |
| 27.6 | 6.7 | 5.1 | 28.7 | 84.7 | 27.3 | 6.7 | 5.3 |
| 27.9 | 6.8 | 5.4 | 29.4 | 84.9 | 28.4 | 6.7 | 4.8 |
| 29.4 | 6.7 | 3.5 | 29.4 | 85.8 | 28.8 | 6.7 | 5.3 |
| 28.5 | 6.9 | 5.3 | 29.9 | 85.6 | 29.0 | 6.8 | 5.4 |
| 29.7 | 6.9 | 5.3 | 29.4 | 85.2 | 30.6 | 6.8 | 5.1 |
| 28.4 | 6.7 | 4.0 | 30.3 | 86.3 | 29.6 | 6.8 | 4.5 |
| 28.9 | 6.8 | 4.7 | 29.5 | 85.4 | 29.8 | 6.8 | 4.7 |
| 29.4 | 6.7 | 3.5 | 29.4 | 85.8 | 28.8 | 6.7 | 5.3 |
| 28.9 | 6.9 | 4.7 | 30.5 | 85.8 | 31.2 | 6.8 | 4.4 |
| 29.2 | 6.9 | 4.9 | 30.9 | 85.7 | 29.1 | 6.7 | 4.5 |
| 29.5 | 6.8 | 4.5 | 29.4 | 85.9 | 29.3 | 6.8 | 5.2 |
| 27.2 | 6.8 | 4.8 | 30.5 | 85.1 | 30.6 | 6.8 | 5.4 |
| 29.4 | 6.7 | 3.5 | 29.4 | 85.8 | 28.8 | 6.7 | 5.3 |
| 30.0 | 6.9 | 4.1 | 29.1 | 82.7 | 28.2 | 6.8 | 5.4 |
| 28.2 | 6.9 | 4.6 | 31.6 | 88.3 | 30.0 | 6.9 | 4.7 |
| 29.1 | 6.9 | 4.5 | 29.4 | 83.1 | 29.9 | 6.7 | 4.0 |
| 29.4 | 6.8 | 3.8 | 30.2 | 84.9 | 29.8 | 6.7 | 4.3 |
| 29.4 | 6.7 | 3.5 | 29.4 | 85.8 | 28.8 | 6.7 | 5.3 |
| 28.4 | 6.9 | 5.4 | 29.8 | 85.4 | 29.9 | 6.8 | 5.0 |
| 27.5 | 6.9 | 4.7 | 27.9 | 84.3 | 28.8 | 6.7 | 4.8 |
| 32.5 | 7.0 | 4.9 | 31.0 | 86.2 | 30.8 | 6.9 | 5.6 |
| 30.7 | 6.9 | 4.5 | 32.4 | 84.5 | 33.7 | 6.9 | 5.0 |
| 29.4 | 6.7 | 3.5 | 29.4 | 85.8 | 28.8 | 6.7 | 5.3 |
| 29.2 | 6.8 | 5.1 | 29.6 | 86.5 | 28.2 | 6.7 | 5.0 |
| 27.8 | 6.8 | 5.6 | 29.2 | 85.3 | 29.6 | 6.8 | 5.3 |
| 29.1 | 6.9 | 4.9 | 31.0 | 85.9 | 31.5 | 6.8 | 4.9 |
| 29.0 | 6.8 | 4.5 | 30.6 | 85.8 | 29.6 | 6.7 | 4.8 |
| 29.4 | 6.7 | 3.5 | 29.4 | 85.8 | 28.8 | 6.7 | 5.3 |
| 28.6 | 6.8 | 4.5 | 29.3 | 84.1 | 28.7 | 6.7 | 5.5 |
| 29.7 | 6.9 | 5.2 | 29.9 | 86.1 | 28.7 | 6.6 | 5.0 |
| 29.0 | 6.7 | 4.3 | 30.8 | 86.4 | 29.3 | 6.7 | 4.9 |
| 29.1 | 6.9 | 5.0 | 31.3 | 86.4 | 28.9 | 6.7 | 4.4 |
| 29.4 | 6.7 | 3.5 | 29.4 | 85.8 | 28.8 | 6.7 | 5.3 |
| 27.9 | 6.8 | 4.8 | 29.8 | 86.4 | 27.0 | 6.7 | 5.2 |
| 28.0 | 6.7 | 5.1 | 30.1 | 85.9 | 29.3 | 6.8 | 5.0 |
| 30.3 | 6.9 | 4.7 | 30.9 | 86.6 | 28.5 | 6.8 | 4.6 |
| 29.3 | 6.8 | 5.0 | 29.3 | 86.5 | 27.3 | 6.7 | 5.3 |

|      |     |     |      |      |      |     |     |
|------|-----|-----|------|------|------|-----|-----|
| 29.4 | 6.7 | 3.5 | 29.4 | 85.8 | 28.8 | 6.7 | 5.3 |
| 29.1 | 6.9 | 5.2 | 30.1 | 86.1 | 29.5 | 6.8 | 5.3 |
| 29.0 | 6.8 | 5.4 | 30.9 | 86.0 | 30.1 | 6.8 | 5.3 |
| 29.2 | 6.9 | 5.6 | 29.5 | 82.5 | 28.9 | 6.8 | 5.1 |
| 29.0 | 6.9 | 4.9 | 30.2 | 84.6 | 27.0 | 6.7 | 5.1 |
| 29.9 | 6.8 | 3.9 | 30.1 | 86.6 | 30.1 | 6.8 | 4.6 |
| 26.3 | 6.6 | 3.8 | 28.0 | 82.7 | 28.4 | 6.6 | 4.6 |
| 28.0 | 6.8 | 5.2 | 31.9 | 86.4 | 31.2 | 6.9 | 4.6 |
| 28.9 | 6.8 | 5.2 | 29.3 | 84.4 | 29.7 | 6.7 | 5.3 |
| 28.3 | 6.8 | 5.4 | 30.6 | 83.7 | 31.4 | 6.9 | 4.7 |
| 29.9 | 6.8 | 3.9 | 30.1 | 86.6 | 30.1 | 6.8 | 4.6 |
| 28.6 | 6.8 | 4.4 | 30.7 | 86.2 | 30.3 | 6.9 | 4.9 |
| 27.6 | 6.8 | 5.3 | 29.7 | 84.9 | 28.2 | 6.7 | 5.4 |
| 28.9 | 6.8 | 4.4 | 28.7 | 85.0 | 27.1 | 6.6 | 4.8 |
| 28.1 | 6.8 | 4.8 | 28.0 | 84.3 | 28.0 | 6.6 | 4.8 |
| 29.9 | 6.8 | 3.9 | 30.1 | 86.6 | 30.1 | 6.8 | 4.6 |
| 25.9 | 6.7 | 5.4 | 25.1 | 81.5 | 24.9 | 6.5 | 5.0 |
| 28.0 | 6.9 | 5.1 | 26.5 | 79.1 | 26.8 | 6.5 | 4.4 |
| 29.0 | 6.9 | 4.6 | 30.5 | 83.7 | 28.8 | 6.8 | 5.1 |
| 28.2 | 6.8 | 4.3 | 32.0 | 85.8 | 29.0 | 6.9 | 4.8 |
| 29.9 | 6.8 | 3.9 | 30.1 | 86.6 | 30.1 | 6.8 | 4.6 |
| 28.5 | 6.8 | 4.7 | 30.0 | 86.2 | 28.0 | 6.7 | 4.6 |
| 28.4 | 6.8 | 4.7 | 31.0 | 82.9 | 30.4 | 6.8 | 4.1 |
| 28.9 | 6.9 | 5.1 | 31.3 | 84.4 | 28.6 | 6.7 | 5.0 |
| 30.1 | 6.9 | 4.9 | 30.6 | 85.1 | 30.2 | 6.8 | 4.4 |
| 29.9 | 6.8 | 3.9 | 30.1 | 86.6 | 30.1 | 6.8 | 4.6 |
| 28.4 | 6.9 | 4.6 | 30.8 | 85.7 | 30.2 | 6.8 | 4.7 |
| 28.3 | 6.7 | 3.9 | 31.3 | 87.1 | 29.8 | 6.8 | 5.0 |
| 28.2 | 6.7 | 5.3 | 30.0 | 86.2 | 29.2 | 6.8 | 5.3 |
| 28.4 | 6.8 | 4.8 | 29.4 | 86.2 | 28.5 | 6.7 | 4.6 |
| 29.9 | 6.8 | 3.9 | 30.1 | 86.6 | 30.1 | 6.8 | 4.6 |
| 27.0 | 6.7 | 4.6 | 28.7 | 83.1 | 31.7 | 6.7 | 5.0 |
| 28.7 | 6.8 | 5.5 | 28.7 | 86.3 | 29.7 | 6.7 | 5.5 |
| 27.8 | 6.8 | 5.6 | 30.8 | 86.0 | 31.0 | 6.9 | 5.2 |
| 29.8 | 6.9 | 5.0 | 31.7 | 86.0 | 31.2 | 7.0 | 5.1 |
| 29.9 | 6.8 | 3.9 | 30.1 | 86.6 | 30.1 | 6.8 | 4.6 |
| 29.0 | 6.8 | 4.6 | 31.2 | 82.5 | 30.6 | 6.8 | 5.1 |
| 30.4 | 6.8 | 4.8 | 30.5 | 84.3 | 30.8 | 6.8 | 4.9 |
| 31.3 | 6.8 | 4.7 | 30.9 | 85.8 | 31.7 | 6.8 | 4.6 |
| 27.2 | 6.9 | 5.5 | 30.8 | 86.6 | 30.9 | 6.8 | 4.8 |
| 29.9 | 6.8 | 3.9 | 30.1 | 86.6 | 30.1 | 6.8 | 4.6 |
| 28.1 | 6.9 | 5.3 | 30.1 | 84.8 | 29.4 | 6.8 | 5.5 |
| 31.2 | 6.7 | 4.0 | 28.9 | 84.9 | 26.5 | 6.7 | 5.2 |
| 29.8 | 6.9 | 4.8 | 30.6 | 85.8 | 30.3 | 6.9 | 5.1 |
| 29.5 | 6.8 | 4.6 | 30.4 | 86.3 | 29.4 | 6.8 | 5.1 |
| 29.9 | 6.8 | 3.9 | 30.1 | 86.6 | 30.1 | 6.8 | 4.6 |
| 25.1 | 6.6 | 5.5 | 29.6 | 86.0 | 27.8 | 6.6 | 5.0 |
| 26.4 | 6.7 | 5.3 | 28.0 | 84.6 | 26.9 | 6.7 | 5.3 |
| 29.0 | 7.0 | 5.2 | 28.9 | 81.7 | 27.8 | 6.7 | 4.7 |
| 30.2 | 6.9 | 4.8 | 30.7 | 86.6 | 30.8 | 6.9 | 4.7 |

|      |     |     |      |      |      |     |     |
|------|-----|-----|------|------|------|-----|-----|
| 29.9 | 6.8 | 3.9 | 30.1 | 86.6 | 30.1 | 6.8 | 4.6 |
| 28.7 | 6.8 | 5.2 | 31.3 | 87.2 | 30.6 | 6.8 | 4.9 |
| 30.7 | 6.8 | 4.7 | 30.6 | 86.5 | 30.9 | 6.7 | 4.4 |
| 28.7 | 6.8 | 5.4 | 30.5 | 85.2 | 31.8 | 6.8 | 4.3 |
| 28.9 | 6.9 | 5.3 | 30.5 | 85.4 | 28.8 | 6.8 | 4.6 |
| 27.0 | 6.7 | 4.8 | 29.1 | 87.2 | 28.8 | 6.7 | 4.8 |
| 28.7 | 6.9 | 5.3 | 29.7 | 86.4 | 28.3 | 6.7 | 5.4 |
| 28.6 | 6.8 | 5.4 | 27.7 | 84.0 | 27.7 | 6.6 | 5.2 |
| 31.5 | 6.9 | 4.0 | 30.0 | 85.4 | 30.1 | 6.8 | 4.8 |
| 29.0 | 6.9 | 4.8 | 29.8 | 84.9 | 30.5 | 6.8 | 4.4 |
| 27.0 | 6.7 | 4.8 | 29.1 | 87.2 | 28.8 | 6.7 | 4.8 |
| 29.4 | 6.8 | 5.2 | 27.8 | 81.6 | 29.3 | 6.7 | 5.3 |
| 29.2 | 6.7 | 4.5 | 28.2 | 85.9 | 29.9 | 6.7 | 5.1 |
| 29.7 | 6.7 | 4.8 | 28.1 | 85.1 | 31.9 | 6.7 | 4.8 |
| 30.2 | 6.8 | 4.9 | 29.2 | 84.0 | 29.3 | 6.6 | 4.7 |
| 27.0 | 6.7 | 4.8 | 29.1 | 87.2 | 28.8 | 6.7 | 4.8 |
| 29.9 | 6.8 | 4.0 | 29.6 | 86.4 | 31.4 | 6.8 | 4.4 |
| 30.1 | 6.9 | 4.5 | 30.7 | 86.3 | 29.5 | 6.7 | 4.7 |
| 29.2 | 6.7 | 4.4 | 31.1 | 85.4 | 30.8 | 6.8 | 4.5 |
| 29.4 | 6.8 | 4.6 | 30.2 | 83.7 | 29.3 | 6.8 | 5.4 |
| 27.0 | 6.7 | 4.8 | 29.1 | 87.2 | 28.8 | 6.7 | 4.8 |
| 28.3 | 6.8 | 4.4 | 27.8 | 85.4 | 27.0 | 6.6 | 5.7 |
| 25.8 | 6.6 | 5.6 | 25.5 | 83.4 | 25.2 | 6.5 | 5.7 |
| 27.5 | 6.6 | 5.2 | 26.3 | 83.2 | 26.8 | 6.5 | 4.7 |
| 27.4 | 6.8 | 5.1 | 27.4 | 83.2 | 27.5 | 6.6 | 5.2 |
| 27.0 | 6.7 | 4.8 | 29.1 | 87.2 | 28.8 | 6.7 | 4.8 |
| 29.1 | 6.9 | 5.2 | 27.7 | 84.5 | 27.0 | 6.6 | 5.4 |
| 28.4 | 6.9 | 5.1 | 29.0 | 85.9 | 27.8 | 6.8 | 5.2 |
| 29.1 | 6.7 | 5.0 | 28.6 | 86.4 | 28.7 | 6.7 | 5.2 |
| 29.7 | 6.8 | 4.4 | 29.5 | 84.6 | 30.5 | 6.8 | 5.3 |
| 27.0 | 6.7 | 4.8 | 29.1 | 87.2 | 28.8 | 6.7 | 4.8 |
| 28.2 | 6.8 | 4.9 | 30.6 | 85.0 | 29.4 | 6.8 | 5.2 |
| 29.0 | 6.8 | 4.5 | 29.8 | 82.3 | 30.2 | 6.8 | 4.8 |
| 28.7 | 6.7 | 3.7 | 31.0 | 85.0 | 30.7 | 6.8 | 4.3 |
| 27.9 | 6.8 | 4.6 | 31.0 | 85.4 | 30.8 | 6.8 | 4.5 |
| 27.0 | 6.7 | 4.8 | 29.1 | 87.2 | 28.8 | 6.7 | 4.8 |
| 26.4 | 6.6 | 4.3 | 29.0 | 84.9 | 29.1 | 6.7 | 4.8 |
| 28.8 | 6.9 | 5.1 | 29.3 | 86.5 | 28.5 | 6.7 | 5.2 |
| 29.5 | 6.8 | 3.4 | 28.8 | 85.1 | 27.6 | 6.6 | 5.1 |
| 28.0 | 6.8 | 4.9 | 31.2 | 86.1 | 30.4 | 6.8 | 5.0 |
| 27.0 | 6.7 | 4.8 | 29.1 | 87.2 | 28.8 | 6.7 | 4.8 |
| 29.6 | 6.8 | 5.2 | 30.2 | 86.8 | 28.3 | 6.7 | 5.1 |
| 31.7 | 7.0 | 4.8 | 30.5 | 85.2 | 30.1 | 6.7 | 5.0 |
| 27.9 | 6.7 | 4.7 | 26.5 | 82.7 | 26.7 | 6.6 | 4.9 |
| 28.3 | 6.8 | 5.2 | 28.0 | 83.0 | 28.2 | 6.7 | 5.2 |
| 27.0 | 6.7 | 4.8 | 29.1 | 87.2 | 28.8 | 6.7 | 4.8 |
| 29.1 | 6.7 | 5.0 | 29.1 | 85.2 | 28.4 | 6.7 | 5.0 |
| 30.6 | 6.9 | 4.6 | 31.6 | 86.1 | 30.0 | 6.7 | 4.5 |
| 27.7 | 6.9 | 5.7 | 27.3 | 84.0 | 27.1 | 6.6 | 4.9 |
| 28.3 | 6.8 | 5.4 | 31.2 | 85.7 | 30.2 | 6.9 | 4.9 |

|      |     |     |      |      |      |     |     |
|------|-----|-----|------|------|------|-----|-----|
| 27.0 | 6.7 | 4.8 | 29.1 | 87.2 | 28.8 | 6.7 | 4.8 |
| 29.4 | 6.8 | 5.2 | 28.5 | 84.8 | 28.8 | 6.7 | 4.8 |
| 27.4 | 6.8 | 5.3 | 29.7 | 84.2 | 29.2 | 6.7 | 5.3 |
| 29.0 | 6.8 | 5.5 | 28.9 | 84.0 | 29.8 | 6.7 | 5.6 |

---













































**Table S7 Phenotype values of fiber quality traits in field trial of BC/P population in this study**

| Number of field trial plot | Material | FL/mm  | FU/%   | FS(cN/tex) | FE/%   | FM     |
|----------------------------|----------|--------|--------|------------|--------|--------|
|                            |          | 2016E2 | 2016E2 | 2016E2     | 2016E2 | 2016E2 |
| 001                        | 14QM003  | 29.4   | 85.7   | 30.4       | 6.8    | 4.8    |
| 002                        | 14QM003H | 30.0   | 86.5   | 31.0       | 6.8    | 5.0    |
| 003                        | P♀       | 28.4   | 82.9   | 30.6       | 6.8    | 5.4    |
| 004                        | 14QM004H | 29.8   | 83.5   | 30.3       | 6.8    | 5.2    |
| 005                        | 14QM004  | 30.7   | 85.8   | 30.3       | 6.8    | 4.7    |
| 006                        | 14QM005  | 29.3   | 84.8   | 33.0       | 6.8    | 5.2    |
| 007                        | 14QM005H | 29.1   | 85.4   | 30.8       | 6.7    | 5.4    |
| 008                        | P♀       | 28.4   | 82.9   | 30.6       | 6.8    | 5.4    |
| 009                        | 14QM006H | 29.9   | 85.4   | 30.9       | 6.8    | 5.0    |
| 010                        | 14QM006  | 30.9   | 86.0   | 31.5       | 6.7    | 4.6    |
| 011                        | 14QM007  | 29.1   | 85.2   | 28.3       | 6.8    | 5.2    |
| 012                        | 14QM007H | 29.3   | 83.2   | 29.7       | 6.8    | 5.2    |
| 013                        | P♀       | 28.4   | 82.9   | 30.6       | 6.8    | 5.4    |
| 014                        | 14QM008H | 29.5   | 85.3   | 29.6       | 6.7    | 4.9    |
| 015                        | 14QM008  | 31.3   | 84.4   | 30.6       | 6.9    | 4.4    |
| 016                        | 14QM009  | 26.3   | 80.8   | 25.6       | 6.5    | 5.1    |
| 017                        | 14QM009H | 28.3   | 83.1   | 29.0       | 6.7    | 5.2    |
| 018                        | P♀       | 28.4   | 82.9   | 30.6       | 6.8    | 5.4    |
| 019                        | 14QM010H | 30.0   | 84.8   | 28.9       | 6.8    | 5.3    |
| 020                        | 14QM010  | 30.1   | 82.9   | 31.8       | 6.8    | 5.4    |
| 021                        | 14QM011  | 29.9   | 86.2   | 29.9       | 6.8    | 5.3    |
| 022                        | 14QM011H | 30.3   | 84.9   | 30.5       | 6.8    | 5.3    |
| 023                        | P♀       | 28.4   | 82.9   | 30.6       | 6.8    | 5.4    |
| 024                        | 14QM012H | 29.8   | 82.1   | 32.1       | 6.8    | 5.2    |
| 025                        | 14QM012  | 30.1   | 84.5   | 32.0       | 6.9    | 5.3    |
| 026                        | 14QM013  | 27.6   | 84.6   | 27.2       | 6.7    | 5.6    |
| 027                        | 14QM013H | 28.9   | 86.2   | 27.9       | 6.7    | 5.4    |
| 028                        | P♀       | 28.4   | 82.9   | 30.6       | 6.8    | 5.4    |
| 029                        | 14QM014H | 30.0   | 84.3   | 29.8       | 6.7    | 4.9    |
| 030                        | 14QM014  | 28.4   | 85.2   | 27.9       | 6.7    | 4.7    |
| 031                        | 14QM015  | 28.9   | 86.3   | 27.8       | 6.7    | 4.7    |
| 032                        | 14QM015H | 28.1   | 83.2   | 28.5       | 6.7    | 5.1    |
| 033                        | P♀       | 28.4   | 82.9   | 30.6       | 6.8    | 5.4    |
| 034                        | 14QM016H | 27.1   | 84.7   | 27.7       | 6.6    | 5.4    |
| 035                        | 14QM016  | 30.9   | 85.8   | 32.0       | 6.9    | 5.1    |
| 036                        | 14QM017  | 30.4   | 85.1   | 30.8       | 6.8    | 4.3    |
| 037                        | 14QM017H | 28.4   | 84.6   | 31.0       | 6.7    | 4.9    |
| 038                        | P♀       | 28.4   | 82.9   | 30.6       | 6.8    | 5.4    |
| 039                        | 14QM018H | 30.3   | 85.3   | 30.2       | 6.8    | 4.7    |
| 040                        | 14QM018  | 30.0   | 85.5   | 29.7       | 6.7    | 4.7    |
| 041                        | 14QM019  | 27.9   | 84.3   | 29.9       | 6.7    | 5.0    |
| 042                        | 14QM019H | 30.1   | 83.4   | 31.1       | 6.8    | 4.9    |
| 043                        | P♀       | 28.4   | 82.9   | 30.6       | 6.8    | 5.4    |
| 044                        | 14QM020H | 28.7   | 85.4   | 28.1       | 6.6    | 5.2    |
| 045                        | 14QM020  | 29.5   | 84.9   | 29.6       | 6.7    | 4.5    |
| 046                        | 14QM021  | 28.7   | 84.1   | 28.1       | 6.7    | 5.2    |
| 047                        | 14QM021H | 29.8   | 85.3   | 29.8       | 6.7    | 5.0    |
| 048                        | P♀       | 28.4   | 82.9   | 30.6       | 6.8    | 5.4    |
| 049                        | 14QM022H | 29.5   | 86.0   | 29.7       | 6.7    | 5.1    |
| 050                        | 14QM022  | 30.2   | 86.1   | 31.1       | 6.8    | 4.6    |
| 051                        | 14QM023  | 28.5   | 85.2   | 28.0       | 6.7    | 4.8    |
| 052                        | 14QM023H | 30.4   | 84.2   | 30.7       | 6.8    | 5.1    |
| 053                        | P♀       | 30.2   | 84.9   | 30.4       | 6.8    | 5.4    |
| 054                        | 14QM024H | 30.5   | 83.5   | 30.2       | 6.8    | 4.9    |
| 055                        | 14QM024  | 30.9   | 86.2   | 30.1       | 6.8    | 4.4    |
| 056                        | 14QM025  | 29.8   | 81.4   | 28.6       | 6.7    | 5.4    |

|     |          |      |      |      |     |     |
|-----|----------|------|------|------|-----|-----|
| 057 | 14QM025H | 28.9 | 84.4 | 29.8 | 6.7 | 5.4 |
| 058 | P♀       | 30.2 | 84.9 | 30.4 | 6.8 | 5.4 |
| 059 | 14QM026H | 28.6 | 84.1 | 28.2 | 6.7 | 5.2 |
| 060 | 14QM026  | 28.7 | 85.2 | 27.3 | 6.7 | 5.1 |
| 061 | 14QM027  | 27.8 | 82.3 | 26.9 | 6.7 | 5.6 |
| 062 | 14QM027H | 27.8 | 84.5 | 27.2 | 6.7 | 5.2 |
| 063 | P♀       | 30.2 | 84.9 | 30.4 | 6.8 | 5.4 |
| 064 | 14QM028H | 30.4 | 86.4 | 30.2 | 6.8 | 5.2 |
| 065 | 14QM028  | 29.0 | 86.8 | 27.5 | 6.7 | 5.3 |
| 066 | 14QM029  | 30.9 | 86.2 | 28.9 | 6.7 | 4.9 |
| 067 | 14QM029H | 32.4 | 87.8 | 30.3 | 6.9 | 4.7 |
| 068 | P♀       | 30.2 | 84.9 | 30.4 | 6.8 | 5.4 |
| 069 | 14QM030H | 30.0 | 81.8 | 29.7 | 6.8 | 4.5 |
| 070 | 14QM030  | 31.6 | 84.3 | 30.7 | 6.8 | 3.8 |
| 071 | 14QM031  | 32.7 | 86.7 | 30.9 | 6.9 | 4.1 |
| 072 | 14QM031H | 30.0 | 83.1 | 30.2 | 6.7 | 4.6 |
| 073 | P♀       | 30.2 | 84.9 | 30.4 | 6.8 | 5.4 |
| 074 | 14QM032H | 26.8 | 84.1 | 28.4 | 6.6 | 5.6 |
| 075 | 14QM032  | 31.9 | 87.6 | 31.9 | 6.9 | 4.7 |
| 076 | 14QM033  | 25.3 | 84.2 | 25.1 | 6.5 | 6.0 |
| 077 | 14QM033H | 26.0 | 84.7 | 25.3 | 6.5 | 5.4 |
| 078 | P♀       | 30.2 | 84.9 | 30.4 | 6.8 | 5.4 |
| 079 | 14QM034H | 30.8 | 87.5 | 29.7 | 6.8 | 5.4 |
| 080 | 14QM034  | 27.4 | 82.9 | 28.1 | 6.6 | 5.1 |
| 081 | 14QM035  | 27.6 | 83.1 | 28.9 | 6.6 | 4.3 |
| 082 | 14QM035H | 27.4 | 83.2 | 28.7 | 6.6 | 5.2 |
| 083 | P♀       | 30.2 | 84.9 | 30.4 | 6.8 | 5.4 |
| 084 | 14QM036H | 28.0 | 84.7 | 29.2 | 6.7 | 4.9 |
| 085 | 14QM036  | 28.6 | 85.5 | 26.5 | 6.7 | 5.6 |
| 086 | 14QM037  | 26.3 | 83.1 | 26.3 | 6.5 | 4.7 |
| 087 | 14QM037H | 30.7 | 86.7 | 30.6 | 6.8 | 5.2 |
| 088 | P♀       | 30.2 | 84.9 | 30.4 | 6.8 | 5.4 |
| 089 | 14QM038H | 29.0 | 84.5 | 30.1 | 6.7 | 5.2 |
| 090 | 14QM038  | 27.2 | 82.3 | 28.7 | 6.7 | 5.4 |
| 091 | 14QM039  | 26.3 | 84.4 | 26.2 | 6.5 | 5.2 |
| 092 | 14QM039H | 30.3 | 85.5 | 28.4 | 6.8 | 5.7 |
| 093 | P♀       | 30.2 | 84.9 | 30.4 | 6.8 | 5.4 |
| 094 | 14QM040H | 30.7 | 86.3 | 31.3 | 6.8 | 4.8 |
| 095 | 14QM040  | 25.8 | 84.1 | 25.9 | 6.5 | 4.9 |
| 096 | 14QM041  | 29.2 | 84.7 | 28.7 | 6.7 | 4.6 |
| 097 | 14QM041H | 28.4 | 85.3 | 30.3 | 6.7 | 5.0 |
| 098 | P♀       | 30.2 | 84.9 | 30.4 | 6.8 | 5.4 |
| 099 | 14QM042H | 29.8 | 86.1 | 29.7 | 6.8 | 5.3 |
| 100 | 14QM042  | 27.3 | 82.5 | 27.1 | 6.6 | 5.4 |
| 101 | 14QM043  | 28.4 | 85.0 | 28.5 | 6.7 | 5.1 |
| 102 | 14QM043H | 28.7 | 84.1 | 28.6 | 6.7 | 5.5 |
| 103 | P♀       | 29.2 | 87.2 | 30.6 | 6.7 | 4.7 |
| 104 | 14QM044H | 29.6 | 85.9 | 29.0 | 6.8 | 5.5 |
| 105 | 14QM044  | 29.4 | 83.1 | 28.6 | 6.7 | 5.0 |
| 106 | 14QM045  | 30.5 | 85.5 | 30.5 | 6.8 | 4.8 |
| 107 | 14QM045H | 30.3 | 86.6 | 30.8 | 6.8 | 4.7 |
| 108 | P♀       | 29.2 | 87.2 | 30.6 | 6.7 | 4.7 |
| 109 | 14QM046H | 28.0 | 84.4 | 29.9 | 6.7 | 4.6 |
| 110 | 14QM046  | 27.8 | 84.6 | 28.3 | 6.7 | 5.2 |
| 111 | 14QM047  | 29.4 | 85.7 | 30.5 | 6.7 | 4.8 |
| 112 | 14QM047H | 28.9 | 86.2 | 30.7 | 6.7 | 4.8 |
| 113 | P♀       | 29.2 | 87.2 | 30.6 | 6.7 | 4.7 |
| 114 | 14QM048H | 28.5 | 84.4 | 27.7 | 6.7 | 5.4 |
| 115 | 14QM048  | 28.7 | 85.6 | 28.3 | 6.7 | 4.6 |

|     |          |      |      |      |     |     |
|-----|----------|------|------|------|-----|-----|
| 116 | 14QM049  | 28.9 | 86.8 | 29.7 | 6.7 | 4.2 |
| 117 | 14QM049H | 28.1 | 84.8 | 27.1 | 6.6 | 5.2 |
| 118 | P♀       | 29.2 | 87.2 | 30.6 | 6.7 | 4.7 |
| 119 | 14QM050H | 28.5 | 84.9 | 28.0 | 6.6 | 5.3 |
| 120 | 14QM050  | 31.1 | 84.7 | 30.4 | 6.8 | 4.8 |
| 121 | 14QM051  | 29.2 | 82.8 | 28.8 | 6.7 | 4.5 |
| 122 | 14QM051H | 28.6 | 86.2 | 28.0 | 6.6 | 5.4 |
| 123 | P♀       | 29.2 | 87.2 | 30.6 | 6.7 | 4.7 |
| 124 | 14QM052H | 27.5 | 83.8 | 28.0 | 6.6 | 5.6 |
| 125 | 14QM052  | 28.0 | 84.0 | 28.4 | 6.7 | 4.7 |
| 126 | 14QM053  | 31.1 | 85.6 | 30.5 | 6.7 | 4.9 |
| 127 | 14QM053H | 29.3 | 83.7 | 29.8 | 6.7 | 4.8 |
| 128 | P♀       | 29.2 | 87.2 | 30.6 | 6.7 | 4.7 |
| 129 | 14QM054H | 27.7 | 84.6 | 27.0 | 6.6 | 5.4 |
| 130 | 14QM054  | 27.6 | 84.7 | 26.6 | 6.6 | 5.2 |
| 131 | 14QM055  | 27.0 | 84.4 | 27.1 | 6.5 | 5.6 |
| 132 | 14QM055H | 28.4 | 85.9 | 29.1 | 6.6 | 5.0 |
| 133 | P♀       | 29.2 | 87.2 | 30.6 | 6.7 | 4.7 |
| 134 | 14QM056H | 30.1 | 85.7 | 30.1 | 6.7 | 5.1 |
| 135 | 14QM056  | 28.6 | 84.8 | 30.8 | 6.7 | 4.9 |
| 136 | 14QM057  | 28.0 | 83.8 | 27.7 | 6.7 | 5.3 |
| 137 | 14QM057H | 28.6 | 85.2 | 28.2 | 6.7 | 5.2 |
| 138 | P♀       | 29.2 | 87.2 | 30.6 | 6.7 | 4.7 |
| 139 | 14QM058H | 27.9 | 85.7 | 29.9 | 6.7 | 5.3 |
| 140 | 14QM058  | 27.8 | 81.8 | 29.0 | 6.7 | 5.0 |
| 141 | 14QM059  | 26.3 | 84.1 | 27.2 | 6.6 | 5.1 |
| 142 | 14QM059H | 26.9 | 84.4 | 28.9 | 6.7 | 5.3 |
| 143 | P♀       | 29.2 | 87.2 | 30.6 | 6.7 | 4.7 |
| 144 | 14QM060H | 31.1 | 85.2 | 32.0 | 6.8 | 4.9 |
| 145 | 14QM060  | 31.2 | 85.6 | 30.8 | 6.8 | 4.7 |
| 146 | 14QM061  | 26.9 | 82.6 | 29.3 | 6.7 | 5.5 |
| 147 | 14QM061H | 28.4 | 85.0 | 28.4 | 6.7 | 5.4 |
| 148 | P♀       | 29.2 | 87.2 | 30.6 | 6.7 | 4.7 |
| 149 | 14QM062H | 31.0 | 84.1 | 31.9 | 6.8 | 4.7 |
| 150 | 14QM062  | 30.3 | 86.4 | 29.8 | 6.8 | 5.0 |
| 151 | 14QM063  | 28.9 | 84.7 | 30.2 | 6.8 | 4.9 |
| 152 | 14QM063H | 29.6 | 86.0 | 29.9 | 6.7 | 4.2 |
| 153 | P♀       | 28.2 | 83.3 | 27.1 | 6.6 | 5.2 |
| 154 | 14QM064H | 30.2 | 84.2 | 29.2 | 6.7 | 4.9 |
| 155 | 14QM064  | 28.7 | 85.4 | 29.7 | 6.7 | 5.6 |
| 156 | 14QM065  | 28.8 | 84.2 | 29.1 | 6.7 | 4.8 |
| 157 | 14QM065H | 29.1 | 86.1 | 29.2 | 6.7 | 5.1 |
| 158 | P♀       | 28.2 | 83.3 | 27.1 | 6.6 | 5.2 |
| 159 | 14QM066H | 30.3 | 86.1 | 28.9 | 6.7 | 5.0 |
| 160 | 14QM066  | 29.0 | 82.7 | 27.4 | 6.6 | 5.1 |
| 161 | 14QM067  | 30.0 | 87.0 | 28.8 | 6.7 | 5.2 |
| 162 | 14QM067H | 28.9 | 85.7 | 29.3 | 6.8 | 5.1 |
| 163 | P♀       | 28.2 | 83.3 | 27.1 | 6.6 | 5.2 |
| 164 | 14QM068H | 30.3 | 86.1 | 29.9 | 6.7 | 4.7 |
| 165 | 14QM068  | 26.9 | 82.1 | 28.5 | 6.6 | 5.4 |
| 166 | 14QM069  |      |      |      |     |     |
| 167 | 14QM069H | 27.9 | 84.2 | 29.1 | 6.7 | 5.4 |
| 168 | P♀       | 28.2 | 83.3 | 27.1 | 6.6 | 5.2 |
| 169 | 14QM070H | 28.9 | 85.0 | 29.1 | 6.7 | 5.6 |
| 170 | 14QM070  | 29.2 | 85.7 | 28.3 | 6.7 | 5.4 |
| 171 | 14QM071  | 28.2 | 84.6 | 28.2 | 6.6 | 4.8 |
| 172 | 14QM071H | 29.9 | 85.7 | 30.4 | 6.8 | 5.4 |
| 173 | P♀       | 28.2 | 83.3 | 27.1 | 6.6 | 5.2 |
| 174 | 14QM072H | 31.0 | 86.0 | 31.0 | 6.9 | 5.0 |

|     |          |      |      |      |     |     |
|-----|----------|------|------|------|-----|-----|
| 175 | 14QM072  | 28.5 | 83.3 | 31.5 | 6.8 | 5.3 |
| 176 | 14QM073  | 28.4 | 84.2 | 31.9 | 6.7 | 4.4 |
| 177 | 14QM073H | 26.9 | 82.6 | 28.2 | 6.6 | 5.1 |
| 178 | P♀       | 28.2 | 83.3 | 27.1 | 6.6 | 5.2 |
| 179 | 14QM074H | 30.2 | 85.5 | 29.7 | 6.7 | 4.9 |
| 180 | 14QM074  | 29.5 | 83.7 | 29.4 | 6.7 | 5.6 |
| 181 | 14QM075  | 26.1 | 79.2 | 26.4 | 6.6 | 5.0 |
| 182 | 14QM075H | 30.7 | 86.8 | 29.1 | 6.8 | 4.7 |
| 183 | P♀       | 28.2 | 83.3 | 27.1 | 6.6 | 5.2 |
| 184 | 14QM076H | 29.8 | 83.8 | 29.6 | 6.8 | 5.4 |
| 185 | 14QM076  | 28.9 | 84.4 | 29.8 | 6.7 | 4.5 |
| 186 | 14QM077  | 28.5 | 84.9 | 30.8 | 6.7 | 4.5 |
| 187 | 14QM077H | 28.9 | 84.2 | 29.2 | 6.7 | 4.9 |
| 188 | P♀       | 28.2 | 83.3 | 27.1 | 6.6 | 5.2 |
| 189 | 14QM078H | 29.2 | 86.3 | 31.0 | 6.7 | 4.7 |
| 190 | 14QM078  | 29.4 | 85.2 | 28.5 | 6.7 | 4.8 |
| 191 | 14QM079  | 30.2 | 85.2 | 30.5 | 6.7 | 4.9 |
| 192 | 14QM079H | 28.8 | 84.9 | 31.6 | 6.7 | 5.0 |
| 193 | P♀       | 28.2 | 83.3 | 27.1 | 6.6 | 5.2 |
| 194 | 14QM080H | 26.8 | 84.7 | 27.1 | 6.5 | 4.9 |
| 195 | 14QM080  | 28.5 | 83.2 | 28.2 | 6.7 | 5.1 |
| 196 | 14QM081  | 27.8 | 83.6 | 29.4 | 6.7 | 4.9 |
| 197 | 14QM081H | 29.9 | 86.4 | 29.6 | 6.8 | 4.8 |
| 198 | P♀       | 28.2 | 83.3 | 27.1 | 6.6 | 5.2 |
| 199 | 14QM082H | 29.2 | 84.5 | 31.0 | 6.7 | 4.9 |
| 200 | 14QM082  | 30.2 | 83.7 | 31.9 | 6.9 | 5.2 |
| 201 | 14QM083  | 29.0 | 85.8 | 28.9 | 6.7 | 5.1 |
| 202 | 14QM083H | 26.2 | 84.6 | 27.3 | 6.6 | 5.4 |
| 203 | P♀       | 29.0 | 85.1 | 28.9 | 6.7 | 5.0 |
| 204 | 14QM084H | 28.5 | 85.6 | 27.9 | 6.7 | 5.3 |
| 205 | 14QM084  | 29.0 | 85.9 | 28.9 | 6.8 | 5.6 |
| 206 | 14QM085  | 28.7 | 82.2 | 28.2 | 6.7 | 5.3 |
| 207 | 14QM085H | 29.6 | 85.4 | 31.0 | 6.8 | 5.3 |
| 208 | P♀       | 29.0 | 85.1 | 28.9 | 6.7 | 5.0 |
| 209 | 14QM086H | 26.4 | 84.3 | 26.3 | 6.6 | 5.5 |
| 210 | 14QM086  | 28.7 | 86.7 | 27.8 | 6.7 | 5.6 |
| 211 | 14QM087  | 28.6 | 85.9 | 28.2 | 6.7 | 5.0 |
| 212 | 14QM087H | 29.9 | 86.0 | 29.4 | 6.8 | 5.3 |
| 213 | P♀       | 29.0 | 85.1 | 28.9 | 6.7 | 5.0 |
| 214 | 14QM088H | 29.5 | 84.7 | 30.1 | 6.8 | 5.5 |
| 215 | 14QM088  | 28.5 | 84.3 | 28.1 | 6.8 | 5.8 |
| 216 | 14QM089  | 25.6 | 83.1 | 24.7 | 6.5 | 5.9 |
| 217 | 14QM089H | 29.5 | 86.0 | 30.2 | 6.8 | 5.4 |
| 218 | P♀       | 29.0 | 85.1 | 28.9 | 6.7 | 5.0 |
| 219 | 14QM090H | 30.0 | 85.5 | 28.5 | 6.7 | 4.7 |
| 220 | 14QM090  | 32.5 | 87.2 | 30.5 | 6.8 | 4.8 |
| 221 | 14QM091  | 30.7 | 87.1 | 29.7 | 6.8 | 5.2 |
| 222 | 14QM091H | 28.3 | 83.8 | 28.0 | 6.6 | 5.0 |
| 223 | P♀       | 29.0 | 85.1 | 28.9 | 6.7 | 5.0 |
| 224 | P♂       | 28.6 | 85.3 | 27.2 | 6.6 | 5.1 |
| 225 | F1       | 29.9 | 85.7 | 29.4 | 6.7 | 5.0 |
| 226 | P♀       | 28.4 | 85.7 | 28.1 | 6.7 | 4.9 |
| 227 | P♀       | 29.0 | 85.1 | 28.9 | 6.7 | 5.0 |
| 228 | 14QM092H | 28.6 | 84.2 | 28.9 | 6.6 | 4.3 |
| 229 | 14QM092  | 31.9 | 86.1 | 31.8 | 6.8 | 4.4 |
| 230 | 14QM093  | 28.1 | 84.6 | 28.1 | 6.7 | 4.7 |
| 231 | 14QM093H | 29.7 | 85.0 | 27.4 | 6.7 | 5.1 |
| 232 | P♀       | 29.0 | 85.1 | 28.9 | 6.7 | 5.0 |
| 233 | 14QM094H | 28.0 | 85.5 | 28.6 | 6.7 | 5.1 |

|     |          |      |      |      |     |     |
|-----|----------|------|------|------|-----|-----|
| 234 | 14QM094  | 29.1 | 85.9 | 27.7 | 6.7 | 5.5 |
| 235 | 14QM095  | 29.7 | 87.5 | 28.8 | 6.8 | 5.7 |
| 236 | 14QM095H | 28.9 | 83.9 | 27.9 | 6.7 | 5.2 |
| 237 | P♀       | 29.0 | 85.1 | 28.9 | 6.7 | 5.0 |
| 238 | 14QM096H | 30.0 | 85.2 | 30.3 | 6.8 | 4.9 |
| 239 | 14QM096  | 31.0 | 86.6 | 27.8 | 6.7 | 4.7 |
| 240 | 14QM097  | 27.9 | 82.2 | 26.7 | 6.5 | 4.9 |
| 241 | 14QM097H | 29.2 | 84.9 | 27.9 | 6.7 | 5.2 |
| 242 | P♀       | 29.0 | 85.1 | 28.9 | 6.7 | 5.0 |
| 243 | 14QM098H | 29.6 | 84.8 | 28.4 | 6.6 | 4.6 |
| 244 | 14QM098  | 28.6 | 84.4 | 27.4 | 6.7 | 4.6 |
| 245 | 14QM099  | 30.3 | 83.5 | 30.0 | 6.8 | 5.1 |
| 246 | 14QM099H | 27.7 | 81.7 | 26.4 | 6.6 | 4.9 |
| 247 | P♀       | 29.0 | 85.1 | 28.9 | 6.7 | 5.0 |
| 248 | 14QM100H | 30.2 | 83.7 | 29.4 | 6.7 | 5.2 |
| 249 | 14QM100  | 29.7 | 83.4 | 28.0 | 6.7 | 4.9 |
| 250 | 14QM101  | 29.3 | 85.0 | 29.7 | 6.7 | 5.2 |
| 251 | 14QM101H | 29.8 | 85.5 | 31.4 | 6.8 | 5.3 |
| 252 | P♀       | 30.2 | 84.6 | 29.5 | 6.7 | 5.3 |
| 253 | 14QM102H | 29.4 | 84.9 | 29.6 | 6.7 | 4.9 |
| 254 | 14QM102  | 29.4 | 82.8 | 29.7 | 6.8 | 5.3 |
| 255 | 14QM103  | 31.5 | 83.3 | 31.0 | 6.8 | 5.4 |
| 256 | 14QM103H | 31.1 | 86.3 | 30.6 | 6.8 | 5.4 |
| 257 | P♀       | 30.2 | 84.6 | 29.5 | 6.7 | 5.3 |
| 258 | 14QM104H | 31.4 | 87.3 | 30.7 | 6.9 | 5.1 |
| 259 | 14QM104  | 30.8 | 86.8 | 31.7 | 6.8 | 5.0 |
| 260 | 14QM105  | 28.4 | 82.4 | 28.9 | 6.8 | 5.3 |
| 261 | 14QM105H | 29.9 | 84.9 | 29.8 | 6.8 | 5.3 |
| 262 | P♀       | 30.2 | 84.6 | 29.5 | 6.7 | 5.3 |
| 263 | 14QM106H | 31.2 | 86.1 | 30.0 | 6.9 | 5.2 |
| 264 | 14QM106  | 31.3 | 84.1 | 31.2 | 6.8 | 4.7 |
| 265 | 14QM107  | 29.6 | 86.1 | 33.8 | 6.8 | 4.8 |
| 266 | 14QM107H | 28.7 | 83.9 | 32.3 | 6.8 | 4.8 |
| 267 | P♀       | 30.2 | 84.6 | 29.5 | 6.7 | 5.3 |
| 268 | 14QM108H | 28.6 | 83.4 | 28.5 | 6.7 | 5.8 |
| 269 | 14QM108  | 30.1 | 84.6 | 30.3 | 6.8 | 4.7 |
| 270 | 14QM109  | 29.2 | 85.1 | 28.7 | 6.7 | 4.3 |
| 271 | 14QM109H | 28.8 | 84.4 | 27.0 | 6.7 | 5.3 |
| 272 | P♀       | 30.2 | 84.6 | 29.5 | 6.7 | 5.3 |
| 273 | 14QM110H | 29.8 | 85.3 | 30.6 | 6.7 | 5.0 |
| 274 | 14QM110  | 28.4 | 83.2 | 29.2 | 6.6 | 4.8 |
| 275 | 14QM111  | 28.7 | 83.9 | 31.2 | 6.7 | 4.0 |
| 276 | 14QM111H | 29.3 | 86.7 | 29.3 | 6.7 | 4.7 |
| 277 | P♀       | 30.2 | 84.6 | 29.5 | 6.7 | 5.3 |
| 278 | 14QM112H | 29.0 | 85.4 | 29.2 | 6.7 | 5.4 |
| 279 | 14QM112  | 28.2 | 82.5 | 27.6 | 6.6 | 5.2 |
| 280 | 14QM113  | 29.7 | 85.6 | 29.1 | 6.7 | 5.1 |
| 281 | 14QM113H | 29.2 | 85.6 | 27.8 | 6.6 | 4.6 |
| 282 | P♀       | 30.2 | 84.6 | 29.5 | 6.7 | 5.3 |
| 283 | 14QM114H | 30.5 | 84.6 | 30.3 | 6.7 | 5.1 |
| 284 | 14QM114  | 30.2 | 84.5 | 29.6 | 6.7 | 4.7 |
| 285 | 14QM115  | 30.4 | 85.9 | 30.1 | 6.9 | 5.4 |
| 286 | 14QM115H | 29.6 | 86.1 | 28.4 | 6.8 | 5.7 |
| 287 | P♀       | 30.2 | 84.6 | 29.5 | 6.7 | 5.3 |
| 288 | 14QM116H | 28.5 | 83.9 | 30.6 | 6.7 | 5.0 |
| 289 | 14QM116  | 28.6 | 84.2 | 28.7 | 6.7 | 5.3 |
| 290 | 14QM117  | 29.5 | 83.6 | 28.1 | 6.7 | 5.3 |
| 291 | 14QM117H | 28.2 | 84.5 | 27.4 | 6.6 | 5.4 |
| 292 | P♀       | 30.2 | 84.6 | 29.5 | 6.7 | 5.3 |



|     |          |      |      |      |     |     |
|-----|----------|------|------|------|-----|-----|
| 293 | 14QM118H | 28.9 | 85.8 | 28.4 | 6.7 | 5.3 |
| 294 | 14QM118  | 28.0 | 83.6 | 28.2 | 6.6 | 4.8 |
| 295 | 14QM119  | 30.1 | 85.4 | 30.0 | 6.7 | 4.7 |
| 296 | 14QM119H | 28.9 | 84.4 | 31.6 | 6.7 | 4.6 |
| 297 | P♀       | 30.2 | 84.6 | 29.5 | 6.7 | 5.3 |
| 298 | 14QM120H | 29.0 | 85.3 | 28.1 | 6.6 | 5.2 |
| 299 | 14QM120  | 27.8 | 85.0 | 27.9 | 6.7 | 5.1 |
| 300 | 14QM121  | 27.6 | 83.8 | 28.9 | 6.6 | 5.2 |
| 301 | 14QM121H | 28.3 | 85.1 | 28.8 | 6.7 | 5.0 |
| 302 | P♀       | 28.6 | 82.8 | 31.0 | 6.7 | 4.7 |
| 303 | 14QM122H | 28.6 | 83.7 | 30.3 | 6.8 | 4.9 |
| 304 | 14QM122  | 28.1 | 83.5 | 28.7 | 6.8 | 4.6 |
| 305 | 14QM123  | 29.9 | 84.1 | 31.9 | 6.8 | 5.1 |
| 306 | 14QM123H | 30.3 | 86.2 | 30.7 | 6.8 | 5.3 |
| 307 | P♀       | 28.6 | 82.8 | 31.0 | 6.7 | 4.7 |
| 308 | 14QM124H | 27.5 | 85.5 | 29.4 | 6.7 | 5.2 |
| 309 | 14QM124  | 29.2 | 85.2 | 27.9 | 6.7 | 5.5 |
| 310 | 14QM125  | 27.5 | 85.7 | 27.8 | 6.6 | 4.9 |
| 311 | 14QM125H | 27.7 | 84.1 | 28.0 | 6.6 | 5.4 |
| 312 | P♀       | 28.6 | 82.8 | 31.0 | 6.7 | 4.7 |
| 313 | 14QM126H | 27.7 | 83.2 | 28.7 | 6.6 | 5.0 |
| 314 | 14QM126  | 26.6 | 83.5 | 27.2 | 6.5 | 5.5 |
| 315 | 14QM127  | 29.6 | 84.8 | 31.4 | 6.7 | 4.7 |
| 316 | 14QM127H | 29.4 | 84.1 | 29.7 | 6.7 | 5.4 |
| 317 | P♀       | 28.6 | 82.8 | 31.0 | 6.7 | 4.7 |
| 318 | 14QM128H | 29.8 | 83.7 | 30.3 | 6.7 | 5.1 |
| 319 | 14QM128  | 28.9 | 80.4 | 31.6 | 6.7 | 4.5 |
| 320 | 14QM129  | 30.5 | 84.6 | 31.2 | 6.9 | 5.0 |
| 321 | 14QM129H | 29.7 | 85.2 | 30.8 | 6.8 | 5.1 |
| 322 | P♀       | 28.6 | 82.8 | 31.0 | 6.7 | 4.7 |
| 323 | 14QM130H | 28.2 | 80.9 | 29.5 | 6.7 | 5.0 |
| 324 | 14QM130  | 30.5 | 84.7 | 31.2 | 6.8 | 4.2 |
| 325 | 14QM131  | 30.3 | 85.8 | 30.2 | 6.7 | 3.7 |
| 326 | 14QM131H | 29.0 | 82.7 | 30.2 | 6.8 | 4.9 |
| 327 | P♀       | 28.6 | 82.8 | 31.0 | 6.7 | 4.7 |
| 328 | 14QM132H | 27.6 | 83.3 | 31.2 | 6.7 | 4.5 |
| 329 | 14QM132  | 28.6 | 85.6 | 28.2 | 6.7 | 5.2 |
| 330 | 14QM133  | 29.0 | 85.5 | 30.2 | 6.8 | 5.5 |
| 331 | 14QM133H | 30.2 | 83.6 | 31.4 | 6.8 | 5.3 |
| 332 | P♀       | 28.6 | 82.8 | 31.0 | 6.7 | 4.7 |
| 333 | 14QM134H | 30.0 | 86.3 | 31.1 | 6.8 | 5.4 |
| 334 | 14QM134  | 27.9 | 83.3 | 28.7 | 6.7 | 5.4 |
| 335 | 14QM135  | 29.9 | 85.9 | 32.6 | 6.8 | 4.6 |
| 336 | 14QM135H | 30.9 | 85.7 | 31.3 | 6.8 | 5.1 |
| 337 | P♀       | 28.6 | 82.8 | 31.0 | 6.7 | 4.7 |
| 338 | 14QM136H | 29.8 | 83.2 | 31.1 | 6.8 | 5.0 |
| 339 | 14QM136  | 29.9 | 83.6 | 30.5 | 6.8 | 4.9 |
| 340 | 14QM137  | 31.5 | 85.7 | 32.1 | 6.8 | 4.9 |
| 341 | 14QM137H | 30.9 | 84.0 | 30.6 | 6.8 | 4.9 |
| 342 | P♀       | 28.6 | 82.8 | 31.0 | 6.7 | 4.7 |
| 343 | 14QM138H | 30.1 | 84.5 | 30.4 | 6.8 | 5.0 |
| 344 | 14QM138  | 29.4 | 84.9 | 29.1 | 6.7 | 4.7 |
| 345 | 14QM139  | 28.7 | 82.5 | 30.4 | 6.7 | 5.0 |
| 346 | 14QM139H | 30.6 | 87.2 | 33.6 | 6.9 | 4.9 |
| 347 | P♀       | 28.6 | 82.8 | 31.0 | 6.7 | 4.7 |
| 348 | 14QM140H | 30.6 | 84.6 | 31.5 | 6.8 | 4.9 |
| 349 | 14QM140  | 32.2 | 86.0 | 31.3 | 6.9 | 5.1 |
| 350 | 14QM141  | 31.4 | 84.4 | 28.9 | 6.8 | 5.4 |
| 351 | 14QM141H | 29.0 | 85.0 | 33.0 | 6.9 | 5.2 |

|     |          |      |      |      |     |     |
|-----|----------|------|------|------|-----|-----|
| 352 | P♀       | 29.1 | 84.7 | 29.6 | 6.7 | 5.2 |
| 353 | 14QM142H | 30.4 | 86.1 | 31.1 | 6.8 | 4.7 |
| 354 | 14QM142  | 29.4 | 86.0 | 31.9 | 6.8 | 4.3 |
| 355 | 14QM143  | 29.2 | 84.5 | 30.0 | 6.7 | 4.8 |
| 356 | 14QM143H | 30.4 | 86.4 | 30.5 | 6.8 | 5.6 |
| 357 | P♀       | 29.1 | 84.7 | 29.6 | 6.7 | 5.2 |
| 358 | 14QM144H | 28.4 | 85.0 | 28.1 | 6.6 | 4.7 |
| 359 | 14QM144  | 27.1 | 82.1 | 27.3 | 6.6 | 5.4 |
| 360 | 14QM145  | 28.5 | 80.4 | 28.6 | 6.7 | 4.7 |
| 361 | 14QM145H | 29.4 | 86.3 | 28.0 | 6.7 | 5.1 |
| 362 | P♀       | 29.1 | 84.7 | 29.6 | 6.7 | 5.2 |
| 363 | 14QM146H | 27.4 | 82.3 | 28.2 | 6.7 | 5.2 |
| 364 | 14QM146  | 29.6 | 84.0 | 28.7 | 6.8 | 4.5 |
| 365 | 14QM147  | 29.3 | 85.6 | 28.8 | 6.7 | 4.5 |
| 366 | 14QM147H | 30.6 | 85.3 | 30.8 | 6.8 | 5.0 |
| 367 | P♀       | 29.1 | 84.7 | 29.6 | 6.7 | 5.2 |
| 368 | 14QM148H | 28.1 | 86.0 | 28.3 | 6.7 | 5.2 |
| 369 | 14QM148  | 30.8 | 86.4 | 29.5 | 6.9 | 4.8 |
| 370 | 14QM149  | 30.1 | 86.7 | 29.5 | 6.7 | 5.2 |
| 371 | 14QM149H | 27.0 | 84.0 | 28.5 | 6.6 | 5.5 |
| 372 | P♀       | 29.1 | 84.7 | 29.6 | 6.7 | 5.2 |
| 373 | 14QM150H | 28.8 | 86.6 | 28.8 | 6.7 | 5.4 |
| 374 | 14QM150  | 28.8 | 86.7 | 28.1 | 6.7 | 5.2 |
| 375 | 14QM151  | 28.0 | 86.5 | 27.0 | 6.6 | 5.7 |
| 376 | 14QM151H | 26.9 | 84.3 | 27.1 | 6.5 | 5.2 |
| 377 | P♀       | 29.1 | 84.7 | 29.6 | 6.7 | 5.2 |
| 378 | 14QM152H | 29.0 | 88.3 | 30.5 | 6.8 | 5.5 |
| 379 | 14QM152  | 28.1 | 85.0 | 28.2 | 6.6 | 5.1 |
| 380 | 14QM153  | 28.4 | 85.0 | 27.3 | 6.6 | 5.4 |
| 381 | 14QM153H | 29.0 | 85.3 | 29.1 | 6.7 | 5.1 |
| 382 | P♀       | 29.1 | 84.7 | 29.6 | 6.7 | 5.2 |
| 383 | 14QM154H | 28.2 | 82.8 | 30.7 | 6.7 | 5.4 |
| 384 | 14QM154  | 28.7 | 82.8 | 28.8 | 6.7 | 4.8 |
| 385 | 14QM155  | 28.7 | 86.8 | 29.2 | 6.7 | 5.7 |
| 386 | 14QM155H | 27.9 | 83.6 | 29.4 | 6.7 | 5.6 |
| 387 | P♀       | 29.1 | 84.7 | 29.6 | 6.7 | 5.2 |
| 388 | 14QM156H | 28.4 | 85.1 | 27.8 | 6.7 | 5.6 |
| 389 | 14QM156  | 28.9 | 85.8 | 29.1 | 6.7 | 5.3 |
| 390 | 14QM157  | 28.9 | 85.2 | 28.0 | 6.7 | 5.3 |
| 391 | 14QM157H | 29.4 | 86.0 | 28.3 | 6.7 | 5.6 |
| 392 | P♀       | 29.1 | 84.7 | 29.6 | 6.7 | 5.2 |
| 393 | 14QM158H | 27.0 | 82.1 | 27.6 | 6.6 | 5.7 |
| 394 | 14QM158  | 26.2 | 83.3 | 25.9 | 6.6 | 5.5 |
| 395 | 14QM159  | 29.8 | 83.9 | 29.4 | 6.8 | 5.0 |
| 396 | 14QM159H | 28.7 | 85.9 | 29.6 | 6.8 | 5.6 |
| 397 | P♀       | 29.1 | 84.7 | 29.6 | 6.7 | 5.2 |
| 398 | 14QM160H | 29.1 | 86.3 | 29.9 | 6.7 | 5.0 |
| 399 | 14QM160  | 28.9 | 87.7 | 32.1 | 6.8 | 5.2 |
| 400 | 14QM161  | 29.5 | 83.0 | 28.4 | 6.7 | 5.4 |
| 401 | 14QM161H | 27.2 | 83.1 | 28.1 | 6.6 | 5.4 |
| 402 | P♀       | 27.1 | 83.8 | 27.0 | 6.6 | 5.9 |
| 403 | 14QM162H | 28.1 | 85.9 | 28.9 | 6.7 | 5.6 |
| 404 | 14QM162  | 28.1 | 84.2 | 26.7 | 6.6 | 5.7 |
| 405 | 14QM163  | 27.9 | 84.5 | 27.5 | 6.7 | 5.2 |
| 406 | 14QM163H | 29.1 | 84.1 | 30.7 | 6.8 | 4.5 |
| 407 | P♀       | 27.1 | 83.8 | 27.0 | 6.6 | 5.9 |
| 408 | 14QM164H | 29.9 | 85.2 | 28.4 | 6.7 | 5.5 |
| 409 | 14QM164  | 28.4 | 87.2 | 28.6 | 6.7 | 5.0 |
| 410 | 14QM165  | 30.5 | 86.5 | 31.7 | 6.7 | 4.6 |

|     |          |      |      |      |     |     |
|-----|----------|------|------|------|-----|-----|
| 411 | 14QM165H | 30.8 | 86.9 | 31.2 | 6.8 | 5.2 |
| 412 | P♀       | 27.1 | 83.8 | 27.0 | 6.6 | 5.9 |
| 413 | 14QM166H | 31.3 | 87.1 | 30.5 | 6.8 | 5.3 |
| 414 | 14QM166  | 31.8 | 87.7 | 30.4 | 6.9 | 5.0 |
| 415 | 14QM167  | 27.8 | 85.2 | 27.5 | 6.6 | 4.9 |
| 416 | 14QM167H | 31.0 | 84.0 | 31.8 | 6.8 | 5.4 |
| 417 | P♀       | 27.1 | 83.8 | 27.0 | 6.6 | 5.9 |
| 418 | 14QM168H | 27.5 | 83.1 | 27.1 | 6.6 | 5.7 |
| 419 | 14QM168  | 26.6 | 83.4 | 25.8 | 6.5 | 5.6 |
| 420 | 14QM169  | 28.6 | 82.2 | 28.0 | 6.7 | 5.4 |
| 421 | 14QM169H | 29.5 | 84.2 | 28.8 | 6.7 | 5.2 |
| 422 | P♀       | 27.1 | 83.8 | 27.0 | 6.6 | 5.9 |
| 423 | 14QM170H | 29.4 | 84.6 | 27.6 | 6.7 | 5.4 |
| 424 | 14QM170  | 30.0 | 85.6 | 28.9 | 6.8 | 5.1 |
| 425 | 14QM171  | 29.0 | 86.2 | 29.0 | 6.7 | 5.0 |
| 426 | 14QM171H | 29.4 | 84.8 | 30.6 | 6.7 | 5.4 |
| 427 | P♀       | 27.1 | 83.8 | 27.0 | 6.6 | 5.9 |
| 428 | 14QM172H | 31.2 | 86.6 | 29.7 | 6.8 | 5.4 |
| 429 | 14QM172  | 30.3 | 85.6 | 32.0 | 6.9 | 4.5 |
| 430 | 14QM173  | 31.2 | 85.1 | 30.1 | 6.8 | 4.6 |
| 431 | 14QM173H | 29.9 | 84.4 | 30.7 | 6.8 | 4.8 |
| 432 | P♀       | 27.1 | 83.8 | 27.0 | 6.6 | 5.9 |
| 433 | 14QM174H | 29.9 | 86.6 | 30.1 | 6.8 | 5.1 |
| 434 | 14QM174  | 30.0 | 86.3 | 29.0 | 6.8 | 4.8 |
| 435 | 14QM175  | 29.2 | 85.4 | 29.7 | 6.8 | 5.3 |
| 436 | 14QM175H | 31.6 | 85.0 | 29.4 | 6.8 | 5.3 |
| 437 | P♀       | 27.1 | 83.8 | 27.0 | 6.6 | 5.9 |
| 438 | 14QM176H | 29.9 | 85.8 | 29.9 | 6.8 | 5.3 |
| 439 | 14QM176  | 32.7 | 85.3 | 31.1 | 6.8 | 4.8 |
| 440 | 14QM177  | 27.6 | 86.4 | 27.4 | 6.6 | 4.9 |
| 441 | 14QM177H | 30.0 | 86.3 | 29.4 | 6.8 | 5.6 |
| 442 | P♀       | 27.1 | 83.8 | 27.0 | 6.6 | 5.9 |
| 443 | 14QM178H | 31.5 | 85.8 | 33.0 | 7.0 | 4.9 |
| 444 | 14QM178  | 31.7 | 84.3 | 31.9 | 6.8 | 4.5 |
| 445 | 14QM179  | 29.6 | 85.4 | 30.8 | 6.8 | 4.6 |
| 446 | 14QM179H | 30.7 | 85.9 | 32.5 | 6.9 | 5.2 |
| 447 | P♀       | 27.1 | 83.8 | 27.0 | 6.6 | 5.9 |
| 448 | P♂       | 29.7 | 85.4 | 28.8 | 6.8 | 5.2 |
| 449 | F1       | 27.4 | 85.1 | 28.8 | 6.7 | 5.4 |
| 450 | P♀       | 29.2 | 85.2 | 29.0 | 6.7 | 5.6 |
| 451 | 14QM003  | 28.1 | 86.3 | 28.3 | 6.7 | 5.3 |
| 452 | 14QM003H | 29.9 | 84.3 | 29.4 | 6.7 | 5.2 |
| 453 | P♀       | 27.9 | 82.8 | 29.4 | 6.7 | 4.8 |
| 454 | 14QM004H | 29.8 | 86.8 | 29.3 | 6.7 | 5.0 |
| 455 | 14QM004  | 30.4 | 88.0 | 29.4 | 6.8 | 4.7 |
| 456 | 14QM005  | 29.1 | 85.5 | 28.9 | 6.6 | 5.2 |
| 457 | 14QM005H | 29.4 | 85.7 | 29.1 | 6.7 | 5.3 |
| 458 | P♀       | 27.9 | 82.8 | 29.4 | 6.7 | 4.8 |
| 459 | 14QM006H | 29.6 | 86.3 | 29.9 | 6.7 | 5.4 |
| 460 | 14QM006  | 29.0 | 84.9 | 31.0 | 6.7 | 5.2 |
| 461 | 14QM007  | 29.6 | 86.5 | 30.4 | 6.9 | 5.4 |
| 462 | 14QM007H | 30.0 | 86.9 | 29.2 | 6.8 | 5.3 |
| 463 | P♀       | 27.9 | 82.8 | 29.4 | 6.7 | 4.8 |
| 464 | 14QM008H | 28.6 | 84.5 | 29.1 | 6.7 | 5.0 |
| 465 | 14QM008  | 30.9 | 87.5 | 32.5 | 6.9 | 4.1 |
| 466 | 14QM009  | 28.1 | 85.4 | 28.6 | 6.7 | 5.4 |
| 467 | 14QM009H | 27.1 | 85.4 | 27.3 | 6.6 | 5.9 |
| 468 | P♀       | 27.9 | 82.8 | 29.4 | 6.7 | 4.8 |
| 469 | 14QM010H | 29.3 | 86.1 | 29.5 | 6.7 | 4.7 |

|     |          |      |      |      |     |     |
|-----|----------|------|------|------|-----|-----|
| 470 | 14QM010  | 29.3 | 87.3 | 28.2 | 6.7 | 5.7 |
| 471 | 14QM011  | 30.6 | 87.4 | 28.5 | 6.7 | 5.8 |
| 472 | 14QM011H | 29.4 | 85.8 | 28.4 | 6.7 | 5.4 |
| 473 | P♀       | 27.9 | 82.8 | 29.4 | 6.7 | 4.8 |
| 474 | 14QM012H | 30.1 | 87.4 | 29.2 | 6.8 | 5.8 |
| 475 | 14QM012  | 30.0 | 85.2 | 30.6 | 6.8 | 5.3 |
| 476 | 14QM013  | 28.8 | 87.2 | 27.3 | 6.7 | 5.4 |
| 477 | 14QM013H | 27.0 | 82.8 | 26.5 | 6.6 | 5.6 |
| 478 | P♀       | 27.9 | 82.8 | 29.4 | 6.7 | 4.8 |
| 479 | 14QM014H | 28.8 | 85.3 | 29.1 | 6.7 | 5.3 |
| 480 | 14QM014  | 29.6 | 85.0 | 28.5 | 6.8 | 5.3 |
| 481 | 14QM015  | 29.5 | 85.2 | 27.7 | 6.7 | 4.6 |
| 482 | 14QM015H | 29.4 | 85.9 | 28.4 | 6.8 | 5.1 |
| 483 | P♀       | 27.9 | 82.8 | 29.4 | 6.7 | 4.8 |
| 484 | 14QM016H | 26.8 | 84.5 | 28.8 | 6.6 | 4.6 |
| 485 | 14QM016  | 29.1 | 85.5 | 27.8 | 6.7 | 5.6 |
| 486 | 14QM017  | 30.8 | 86.2 | 29.1 | 6.8 | 4.5 |
| 487 | 14QM017H | 29.7 | 85.7 | 29.9 | 6.8 | 5.3 |
| 488 | P♀       | 27.9 | 82.8 | 29.4 | 6.7 | 4.8 |
| 489 | 14QM018H | 27.8 | 83.2 | 28.7 | 6.6 | 5.1 |
| 490 | 14QM018  | 29.8 | 84.0 | 30.3 | 6.7 | 4.5 |
| 491 | 14QM019  | 28.5 | 83.2 | 29.4 | 6.7 | 5.7 |
| 492 | 14QM019H | 29.0 | 85.1 | 29.0 | 6.7 | 5.1 |
| 493 | P♀       | 27.9 | 82.8 | 29.4 | 6.7 | 4.8 |
| 494 | 14QM020H | 30.6 | 87.3 | 30.4 | 6.8 | 5.2 |
| 495 | 14QM020  | 30.8 | 85.3 | 30.1 | 6.7 | 4.4 |
| 496 | 14QM021  | 30.7 | 86.0 | 30.6 | 6.8 | 5.3 |
| 497 | 14QM021H | 30.0 | 86.7 | 30.2 | 6.8 | 5.4 |
| 498 | P♀       | 27.9 | 82.8 | 29.4 | 6.7 | 4.8 |
| 499 | 14QM022H | 29.4 | 87.9 | 28.7 | 6.7 | 5.3 |
| 500 | 14QM022  | 31.2 | 86.4 | 30.8 | 6.9 | 5.0 |
| 501 | 14QM023  | 28.8 | 86.9 | 26.9 | 6.6 | 4.8 |
| 502 | 14QM023H | 30.1 | 84.6 | 28.5 | 6.7 | 4.7 |
| 503 | P♀       | 27.2 | 84.0 | 28.4 | 6.6 | 5.1 |
| 504 | 14QM024H | 31.6 | 87.1 | 30.5 | 7.0 | 5.2 |
| 505 | 14QM024  | 30.4 | 85.2 | 32.6 | 6.9 | 4.6 |
| 506 | 14QM025  | 30.1 | 85.8 | 28.9 | 6.7 | 4.9 |
| 507 | 14QM025H | 31.2 | 87.7 | 30.8 | 6.8 | 5.7 |
| 508 | P♀       | 27.2 | 84.0 | 28.4 | 6.6 | 5.1 |
| 509 | 14QM026H | 30.4 | 86.8 | 28.8 | 6.8 | 5.5 |
| 510 | 14QM026  | 30.1 | 86.2 | 28.8 | 6.7 | 5.2 |
| 511 | 14QM027  |      |      |      |     |     |
| 512 | 14QM027H | 31.1 | 86.7 | 29.2 | 6.8 | 4.9 |
| 513 | P♀       | 27.2 | 84.0 | 28.4 | 6.6 | 5.1 |
| 514 | 14QM028H | 30.0 | 87.1 | 31.2 | 6.8 | 4.8 |
| 515 | 14QM028  | 29.1 | 86.4 | 28.5 | 6.8 | 5.2 |
| 516 | 14QM029  | 31.6 | 85.1 | 29.3 | 6.8 | 4.5 |
| 517 | 14QM029H | 31.0 | 85.5 | 30.0 | 6.8 | 5.1 |
| 518 | P♀       | 27.2 | 84.0 | 28.4 | 6.6 | 5.1 |
| 519 | 14QM030H | 31.7 | 87.7 | 31.2 | 6.9 | 4.7 |
| 520 | 14QM030  | 30.7 | 85.7 | 30.3 | 6.7 | 4.0 |
| 521 | 14QM031  | 32.8 | 87.1 | 30.3 | 6.9 | 4.9 |
| 522 | 14QM031H | 30.9 | 87.5 | 31.0 | 6.8 | 4.8 |
| 523 | P♀       | 27.2 | 84.0 | 28.4 | 6.6 | 5.1 |
| 524 | 14QM032H | 30.5 | 86.6 | 33.4 | 6.9 | 5.4 |
| 525 | 14QM032  | 29.8 | 86.9 | 30.6 | 6.9 | 5.7 |
| 526 | 14QM033  | 27.2 | 86.6 | 28.0 | 6.6 | 5.5 |
| 527 | 14QM033H | 27.8 | 86.5 | 29.3 | 6.7 | 5.5 |
| 528 | P♀       | 27.2 | 84.0 | 28.4 | 6.6 | 5.1 |

|     |          |      |      |      |     |     |
|-----|----------|------|------|------|-----|-----|
| 529 | 14QM034H | 29.5 | 86.9 | 29.4 | 6.7 | 5.5 |
| 530 | 14QM034  | 28.0 | 83.4 | 29.5 | 6.7 | 5.4 |
| 531 | 14QM035  | 28.2 | 84.1 | 27.4 | 6.6 | 4.8 |
| 532 | 14QM035H | 29.0 | 84.7 | 27.8 | 6.6 | 5.1 |
| 533 | P♀       | 27.2 | 84.0 | 28.4 | 6.6 | 5.1 |
| 534 | 14QM036H | 27.3 | 83.8 | 27.1 | 6.6 | 5.1 |
| 535 | 14QM036  | 28.9 | 85.9 | 27.9 | 6.7 | 5.8 |
| 536 | 14QM037  | 28.7 | 85.7 | 29.4 | 6.7 | 4.8 |
| 537 | 14QM037H | 28.9 | 85.4 | 29.6 | 6.7 | 4.8 |
| 538 | P♀       | 27.2 | 84.0 | 28.4 | 6.6 | 5.1 |
| 539 | 14QM038H | 28.5 | 86.2 | 28.3 | 6.6 | 5.2 |
| 540 | 14QM038  | 28.3 | 85.3 | 26.8 | 6.6 | 4.8 |
| 541 | 14QM039  | 27.9 | 86.3 | 28.3 | 6.6 | 5.2 |
| 542 | 14QM039H | 27.9 | 84.1 | 28.7 | 6.7 | 5.2 |
| 543 | P♀       | 27.2 | 84.0 | 28.4 | 6.6 | 5.1 |
| 544 | 14QM040H | 30.1 | 86.7 | 30.2 | 6.8 | 5.2 |
| 545 | 14QM040  | 26.6 | 84.7 | 27.7 | 6.6 | 5.3 |
| 546 | 14QM041  | 28.8 | 82.8 | 30.1 | 6.7 | 4.5 |
| 547 | 14QM041H | 29.0 | 83.7 | 27.7 | 6.6 | 4.4 |
| 548 | P♀       | 27.2 | 84.0 | 28.4 | 6.6 | 5.1 |
| 549 | 14QM042H | 30.1 | 87.1 | 28.5 | 6.8 | 5.9 |
| 550 | 14QM042  | 27.4 | 85.5 | 25.9 | 6.6 | 5.3 |
| 551 | 14QM043  | 28.4 | 86.5 | 27.8 | 6.7 | 5.2 |
| 552 | 14QM043H | 28.8 | 85.4 | 27.6 | 6.7 | 5.7 |
| 553 | P♀       | 29.0 | 86.0 | 28.8 | 6.7 | 5.1 |
| 554 | 14QM044H | 28.0 | 85.2 | 29.7 | 6.7 | 5.5 |
| 555 | 14QM044  | 28.5 | 84.3 | 28.8 | 6.8 | 5.6 |
| 556 | 14QM045  | 29.4 | 86.5 | 30.1 | 6.8 | 4.8 |
| 557 | 14QM045H | 28.6 | 85.8 | 31.1 | 6.7 | 5.2 |
| 558 | P♀       | 29.0 | 86.0 | 28.8 | 6.7 | 5.1 |
| 559 | 14QM046H | 27.4 | 83.8 | 28.4 | 6.6 | 5.4 |
| 560 | 14QM046  | 28.8 | 87.5 | 29.3 | 6.7 | 5.4 |
| 561 | 14QM047  | 29.3 | 85.8 | 31.0 | 6.7 | 5.2 |
| 562 | 14QM047H | 28.8 | 86.9 | 32.7 | 6.8 | 5.3 |
| 563 | P♀       | 29.0 | 86.0 | 28.8 | 6.7 | 5.1 |
| 564 | 14QM048H | 27.7 | 84.9 | 28.8 | 6.6 | 5.1 |
| 565 | 14QM048  | 28.6 | 83.7 | 29.3 | 6.7 | 4.7 |
| 566 | 14QM049  | 28.7 | 85.0 | 29.6 | 6.7 | 4.5 |
| 567 | 14QM049H | 27.8 | 85.1 | 29.9 | 6.7 | 4.8 |
| 568 | P♀       | 29.0 | 86.0 | 28.8 | 6.7 | 5.1 |
| 569 | 14QM050H | 29.0 | 84.8 | 31.2 | 6.7 | 4.7 |
| 570 | 14QM050  | 28.4 | 83.6 | 27.6 | 6.6 | 5.1 |
| 571 | 14QM051  | 28.6 | 84.0 | 30.0 | 6.7 | 4.7 |
| 572 | 14QM051H | 30.1 | 85.3 | 29.9 | 6.7 | 4.9 |
| 573 | P♀       | 29.0 | 86.0 | 28.8 | 6.7 | 5.1 |
| 574 | 14QM052H | 28.9 | 82.5 | 30.0 | 6.7 | 5.2 |
| 575 | 14QM052  | 29.0 | 83.1 | 29.6 | 6.7 | 4.9 |
| 576 | 14QM053  | 31.7 | 84.7 | 32.3 | 6.8 | 3.8 |
| 577 | 14QM053H | 29.5 | 85.0 | 28.3 | 6.6 | 5.2 |
| 578 | P♀       | 29.0 | 86.0 | 28.8 | 6.7 | 5.1 |
| 579 | 14QM054H | 28.0 | 85.7 | 28.1 | 6.7 | 5.5 |
| 580 | 14QM054  | 27.9 | 85.1 | 28.2 | 6.6 | 4.9 |
| 581 | 14QM055  | 27.7 | 86.5 | 31.4 | 6.7 | 5.3 |
| 582 | 14QM055H | 29.7 | 88.9 | 30.7 | 6.7 | 5.4 |
| 583 | P♀       | 29.0 | 86.0 | 28.8 | 6.7 | 5.1 |
| 584 | 14QM056H | 30.3 | 85.9 | 29.5 | 6.7 | 5.1 |
| 585 | 14QM056  | 30.5 | 84.5 | 29.3 | 6.7 | 4.7 |
| 586 | 14QM057  | 28.0 | 83.1 | 28.7 | 6.7 | 4.7 |
| 587 | 14QM057H | 27.8 | 84.6 | 26.6 | 6.6 | 5.7 |

|     |          |      |      |      |     |     |
|-----|----------|------|------|------|-----|-----|
| 588 | P♀       | 29.0 | 86.0 | 28.8 | 6.7 | 5.1 |
| 589 | 14QM058H | 27.6 | 84.8 | 28.6 | 6.7 | 6.0 |
| 590 | 14QM058  | 28.0 | 84.4 | 27.8 | 6.6 | 5.3 |
| 591 | 14QM059  | 27.2 | 84.2 | 26.3 | 6.6 | 5.5 |
| 592 | 14QM059H | 28.2 | 84.5 | 27.0 | 6.6 | 5.5 |
| 593 | P♀       | 29.0 | 86.0 | 28.8 | 6.7 | 5.1 |
| 594 | 14QM060H | 29.9 | 85.8 | 29.0 | 6.7 | 5.0 |
| 595 | 14QM060  | 31.4 | 86.3 | 29.3 | 6.8 | 5.4 |
| 596 | 14QM061  | 28.2 | 83.9 | 27.5 | 6.6 | 5.0 |
| 597 | 14QM061H | 28.4 | 84.8 | 27.6 | 6.6 | 5.6 |
| 598 | P♀       | 29.0 | 86.0 | 28.8 | 6.7 | 5.1 |
| 599 | 14QM062H | 29.8 | 86.0 | 30.8 | 6.7 | 5.4 |
| 600 | 14QM062  | 31.7 | 86.3 | 31.2 | 6.9 | 4.7 |
| 601 | 14QM063  | 28.9 | 83.7 | 28.1 | 6.7 | 5.1 |
| 602 | 14QM063H | 28.7 | 84.5 | 30.1 | 6.7 | 5.0 |
| 603 | P♀       | 30.4 | 87.0 | 29.4 | 6.8 | 5.6 |
| 604 | 14QM064H | 29.5 | 86.8 | 29.8 | 6.7 | 5.6 |
| 605 | 14QM064  | 29.2 | 85.3 | 29.7 | 6.7 | 5.4 |
| 606 | 14QM065  | 30.2 | 85.7 | 29.9 | 6.7 | 4.8 |
| 607 | 14QM065H | 29.2 | 86.5 | 29.7 | 6.7 | 5.4 |
| 608 | P♀       | 30.4 | 87.0 | 29.4 | 6.8 | 5.6 |
| 609 | 14QM066H | 27.8 | 83.3 | 27.5 | 6.6 | 5.1 |
| 610 | 14QM066  | 28.2 | 86.8 | 26.5 | 6.6 | 5.1 |
| 611 | 14QM067  | 28.3 | 86.6 | 28.0 | 6.7 | 5.6 |
| 612 | 14QM067H | 28.5 | 84.3 | 28.0 | 6.6 | 5.4 |
| 613 | P♀       | 30.4 | 87.0 | 29.4 | 6.8 | 5.6 |
| 614 | 14QM068H | 28.9 | 85.0 | 28.2 | 6.7 | 5.6 |
| 615 | 14QM068  | 29.6 | 86.8 | 27.0 | 6.6 | 5.6 |
| 616 | 14QM069  | 27.6 | 84.6 | 26.5 | 6.7 | 5.9 |
| 617 | 14QM069H | 25.1 | 82.1 | 24.5 | 6.5 | 5.9 |
| 618 | P♀       | 30.4 | 87.0 | 29.4 | 6.8 | 5.6 |
| 619 | 14QM070H | 29.1 | 87.0 | 28.8 | 6.7 | 4.9 |
| 620 | 14QM070  | 29.6 | 86.6 | 29.2 | 6.7 | 5.2 |
| 621 | 14QM071  | 28.6 | 86.4 | 26.5 | 6.6 | 5.4 |
| 622 | 14QM071H | 28.5 | 85.7 | 27.2 | 6.7 | 5.2 |
| 623 | P♀       | 30.4 | 87.0 | 29.4 | 6.8 | 5.6 |
| 624 | 14QM072H | 27.0 | 85.5 | 27.4 | 6.5 | 5.1 |
| 625 | 14QM072  | 27.6 | 83.3 | 28.1 | 6.6 | 4.7 |
| 626 | 14QM073  | 29.1 | 85.2 | 29.1 | 6.7 | 5.2 |
| 627 | 14QM073H | 28.1 | 82.8 | 28.1 | 6.6 | 5.0 |
| 628 | P♀       | 30.4 | 87.0 | 29.4 | 6.8 | 5.6 |
| 629 | 14QM074H | 28.5 | 84.0 | 28.0 | 6.6 | 5.9 |
| 630 | 14QM074  | 29.0 | 82.2 | 27.9 | 6.6 | 4.8 |
| 631 | 14QM075  | 28.3 | 82.4 | 27.0 | 6.6 | 4.3 |
| 632 | 14QM075H | 29.4 | 84.4 | 27.7 | 6.7 | 5.2 |
| 633 | P♀       | 30.4 | 87.0 | 29.4 | 6.8 | 5.6 |
| 634 | 14QM076H |      |      |      |     |     |
| 635 | 14QM076  | 27.2 | 85.4 | 26.5 | 6.7 | 5.7 |
| 636 | 14QM077  | 27.4 | 83.8 | 28.1 | 6.6 | 4.7 |
| 637 | 14QM077H | 27.4 | 86.0 | 28.5 | 6.6 | 5.0 |
| 638 | P♀       | 30.4 | 87.0 | 29.4 | 6.8 | 5.6 |
| 639 | 14QM078H | 28.4 | 83.3 | 28.1 | 6.6 | 4.7 |
| 640 | 14QM078  | 28.2 | 82.2 | 27.9 | 6.7 | 5.4 |
| 641 | 14QM079  | 28.5 | 84.2 | 29.4 | 6.6 | 4.8 |
| 642 | 14QM079H | 27.7 | 82.7 | 29.4 | 6.6 | 4.8 |
| 643 | P♀       | 30.4 | 87.0 | 29.4 | 6.8 | 5.6 |
| 644 | 14QM080H | 27.6 | 84.7 | 27.1 | 6.6 | 4.9 |
| 645 | 14QM080  | 28.0 | 84.9 | 27.6 | 6.6 | 4.7 |
| 646 | 14QM081  | 30.1 | 86.4 | 28.6 | 6.7 | 4.6 |

|     |          |      |      |      |     |     |
|-----|----------|------|------|------|-----|-----|
| 647 | 14QM081H | 30.3 | 85.9 | 30.7 | 6.8 | 4.4 |
| 648 | P♀       | 30.4 | 87.0 | 29.4 | 6.8 | 5.6 |
| 649 | 14QM082H | 29.4 | 83.3 | 29.0 | 6.7 | 5.0 |
| 650 | 14QM082  | 30.5 | 86.4 | 32.8 | 6.9 | 5.0 |
| 651 | 14QM083  | 29.1 | 86.0 | 29.0 | 6.8 | 5.4 |
| 652 | 14QM083H | 29.8 | 85.9 | 28.4 | 6.7 | 5.3 |
| 653 | P♀       | 28.6 | 83.4 | 27.8 | 6.6 | 5.1 |
| 654 | 14QM084H | 29.4 | 85.0 | 29.2 | 6.7 | 4.8 |
| 655 | 14QM084  | 28.6 | 84.4 | 30.3 | 6.7 | 5.0 |
| 656 | 14QM085  | 30.8 | 85.6 | 30.1 | 6.8 | 4.9 |
| 657 | 14QM085H | 30.5 | 85.3 | 32.1 | 6.9 | 5.1 |
| 658 | P♀       | 28.6 | 83.4 | 27.8 | 6.6 | 5.1 |
| 659 | 14QM086H | 28.8 | 84.1 | 28.5 | 6.7 | 5.1 |
| 660 | 14QM086  | 28.8 | 85.1 | 29.4 | 6.7 | 5.6 |
| 661 | 14QM087  | 29.4 | 85.0 | 29.4 | 6.7 | 5.2 |
| 662 | 14QM087H | 30.1 | 84.6 | 30.2 | 6.8 | 5.7 |
| 663 | P♀       | 28.6 | 83.4 | 27.8 | 6.6 | 5.1 |
| 664 | 14QM088H | 30.8 | 85.6 | 28.7 | 6.8 | 5.6 |
| 665 | 14QM088  | 30.6 | 84.3 | 32.6 | 6.9 | 5.0 |
| 666 | 14QM089  | 29.5 | 84.9 | 29.0 | 6.7 | 5.8 |
| 667 | 14QM089H | 27.9 | 83.1 | 28.5 | 6.7 | 5.3 |
| 668 | P♀       | 28.6 | 83.4 | 27.8 | 6.6 | 5.1 |
| 669 | 14QM090H | 30.8 | 86.2 | 31.8 | 6.8 | 5.0 |
| 670 | 14QM090  | 31.6 | 83.3 | 31.9 | 6.7 | 4.4 |
| 671 | 14QM091  | 30.4 | 85.0 | 30.7 | 6.8 | 5.3 |
| 672 | 14QM091H | 29.3 | 84.0 | 28.9 | 6.7 | 4.7 |
| 673 | P♀       | 28.6 | 83.4 | 27.8 | 6.6 | 5.1 |
| 674 | P♂       | 30.0 | 86.2 | 28.4 | 6.7 | 5.1 |
| 675 | F1       | 28.0 | 82.3 | 29.0 | 6.7 | 4.7 |
| 676 | P♀       | 29.4 | 86.4 | 29.4 | 6.7 | 5.3 |
| 677 | P♀       | 28.6 | 83.4 | 27.8 | 6.6 | 5.1 |
| 678 | 14QM092H | 28.7 | 84.8 | 28.6 | 6.7 | 5.4 |
| 679 | 14QM092  | 31.2 | 86.1 | 32.1 | 6.9 | 4.8 |
| 680 | 14QM093  | 27.9 | 80.4 | 28.0 | 6.6 | 4.3 |
| 681 | 14QM093H | 30.9 | 86.3 | 30.9 | 6.9 | 4.7 |
| 682 | P♀       | 28.6 | 83.4 | 27.8 | 6.6 | 5.1 |
| 683 | 14QM094H | 29.8 | 85.5 | 30.8 | 6.7 | 4.4 |
| 684 | 14QM094  | 28.9 | 84.4 | 28.6 | 6.7 | 5.4 |
| 685 | 14QM095  | 27.9 | 86.4 | 28.5 | 6.6 | 4.9 |
| 686 | 14QM095H | 31.1 | 87.1 | 30.3 | 6.8 | 5.2 |
| 687 | P♀       | 28.6 | 83.4 | 27.8 | 6.6 | 5.1 |
| 688 | 14QM096H | 30.4 | 86.9 | 31.1 | 6.8 | 4.4 |
| 689 | 14QM096  | 30.0 | 84.6 | 30.9 | 6.9 | 4.9 |
| 690 | 14QM097  | 28.7 | 84.6 | 28.0 | 6.6 | 4.8 |
| 691 | 14QM097H | 29.5 | 84.5 | 28.8 | 6.7 | 4.8 |
| 692 | P♀       | 28.6 | 83.4 | 27.8 | 6.6 | 5.1 |
| 693 | 14QM098H | 30.4 | 84.6 | 31.1 | 6.8 | 5.2 |
| 694 | 14QM098  | 28.7 | 83.7 | 27.1 | 6.6 | 4.8 |
| 695 | 14QM099  | 27.7 | 82.0 | 27.9 | 6.6 | 5.2 |
| 696 | 14QM099H | 29.6 | 82.8 | 29.7 | 6.8 | 5.6 |
| 697 | P♀       | 28.6 | 83.4 | 27.8 | 6.6 | 5.1 |
| 698 | 14QM100H | 30.3 | 86.0 | 29.3 | 6.7 | 5.2 |
| 699 | 14QM100  | 28.9 | 86.1 | 29.1 | 6.8 | 5.6 |
| 700 | 14QM101  | 28.0 | 84.1 | 27.0 | 6.6 | 5.3 |
| 701 | 14QM101H | 28.6 | 84.4 | 29.3 | 6.7 | 5.5 |
| 702 | P♀       | 29.8 | 83.2 | 29.1 | 6.7 | 5.4 |
| 703 | 14QM102H | 28.5 | 86.9 | 27.0 | 6.7 | 5.1 |
| 704 | 14QM102  | 30.2 | 86.0 | 29.0 | 6.8 | 4.8 |
| 705 | 14QM103  | 31.5 | 88.0 | 29.5 | 6.8 | 5.3 |

|     |          |      |      |      |     |     |
|-----|----------|------|------|------|-----|-----|
| 706 | 14QM103H | 30.5 | 84.8 | 28.5 | 6.7 | 5.2 |
| 707 | P♀       | 29.8 | 83.2 | 29.1 | 6.7 | 5.4 |
| 708 | 14QM104H | 29.0 | 86.6 | 30.3 | 6.7 | 4.7 |
| 709 | 14QM104  | 30.1 | 87.1 | 29.7 | 6.7 | 4.5 |
| 710 | 14QM105  | 29.1 | 84.3 | 29.4 | 6.7 | 5.4 |
| 711 | 14QM105H | 30.5 | 87.6 | 30.3 | 6.8 | 4.9 |
| 712 | P♀       | 29.8 | 83.2 | 29.1 | 6.7 | 5.4 |
| 713 | 14QM106H | 30.3 | 85.5 | 30.0 | 6.7 | 5.4 |
| 714 | 14QM106  | 31.0 | 86.4 | 28.9 | 6.8 | 4.8 |
| 715 | 14QM107  | 29.4 | 86.1 | 31.7 | 6.7 | 4.6 |
| 716 | 14QM107H | 29.6 | 84.3 | 27.6 | 6.7 | 5.5 |
| 717 | P♀       | 29.8 | 83.2 | 29.1 | 6.7 | 5.4 |
| 718 | 14QM108H | 28.3 | 83.9 | 28.2 | 6.7 | 5.4 |
| 719 | 14QM108  | 29.6 | 85.2 | 27.3 | 6.7 | 5.2 |
| 720 | 14QM109  | 27.8 | 85.4 | 25.9 | 6.6 | 5.3 |
| 721 | 14QM109H | 29.0 | 84.7 | 27.1 | 6.6 | 5.0 |
| 722 | P♀       | 29.8 | 83.2 | 29.1 | 6.7 | 5.4 |
| 723 | 14QM110H | 30.5 | 86.5 | 29.8 | 6.8 | 5.8 |
| 724 | 14QM110  | 29.8 | 84.8 | 29.4 | 6.7 | 5.7 |
| 725 | 14QM111  | 30.7 | 87.5 | 30.6 | 6.8 | 4.6 |
| 726 | 14QM111H | 30.2 | 86.8 | 28.3 | 6.7 | 5.6 |
| 727 | P♀       | 29.8 | 83.2 | 29.1 | 6.7 | 5.4 |
| 728 | 14QM112H | 29.9 | 84.7 | 27.3 | 6.7 | 5.2 |
| 729 | 14QM112  | 28.8 | 87.7 | 27.5 | 6.7 | 5.6 |
| 730 | 14QM113  | 28.8 | 83.6 | 28.8 | 6.7 | 5.3 |
| 731 | 14QM113H | 30.6 | 84.5 | 28.6 | 6.7 | 5.3 |
| 732 | P♀       | 29.8 | 83.2 | 29.1 | 6.7 | 5.4 |
| 733 | 14QM114H | 30.4 | 85.8 | 29.6 | 6.8 | 5.2 |
| 734 | 14QM114  | 29.7 | 84.5 | 30.4 | 6.8 | 4.6 |
| 735 | 14QM115  | 30.6 | 87.0 | 30.1 | 6.9 | 5.4 |
| 736 | 14QM115H | 31.0 | 86.3 | 32.7 | 7.0 | 5.4 |
| 737 | P♀       | 29.8 | 83.2 | 29.1 | 6.7 | 5.4 |
| 738 | 14QM116H | 28.6 | 84.6 | 29.0 | 6.7 | 5.6 |
| 739 | 14QM116  | 29.6 | 85.2 | 30.1 | 6.7 | 5.1 |
| 740 | 14QM117  | 28.9 | 83.3 | 28.2 | 6.7 | 4.5 |
| 741 | 14QM117H | 30.2 | 85.0 | 29.2 | 6.8 | 5.2 |
| 742 | P♀       | 29.8 | 83.2 | 29.1 | 6.7 | 5.4 |
| 743 | 14QM118H | -    | -    | -    | -   | -   |
| 744 | 14QM118  | 27.7 | 83.1 | 27.4 | 6.6 | 5.1 |
| 745 | 14QM119  | 31.2 | 85.0 | 31.5 | 6.8 | 4.5 |
| 746 | 14QM119H | 29.6 | 83.0 | 30.5 | 6.8 | 4.9 |
| 747 | P♀       | 29.8 | 83.2 | 29.1 | 6.7 | 5.4 |
| 748 | 14QM120H | 29.2 | 84.4 | 28.4 | 6.7 | 5.2 |
| 749 | 14QM120  | 27.4 | 83.2 | 26.7 | 6.5 | 4.7 |
| 750 | 14QM121  | 28.9 | 83.8 | 30.8 | 6.7 | 4.9 |
| 751 | 14QM121H | 28.9 | 85.2 | 31.2 | 6.8 | 4.9 |
| 752 | P♀       | 30.1 | 86.3 | 30.5 | 6.8 | 5.0 |
| 753 | 14QM122H | 30.2 | 85.8 | 29.0 | 6.8 | 4.9 |
| 754 | 14QM122  | 29.8 | 85.5 | 30.5 | 6.8 | 5.0 |
| 755 | 14QM123  | 29.6 | 87.1 | 28.7 | 6.7 | 5.1 |
| 756 | 14QM123H | 30.4 | 86.0 | 31.9 | 6.8 | 5.5 |
| 757 | P♀       | 30.1 | 86.3 | 30.5 | 6.8 | 5.0 |
| 758 | 14QM124H | 29.0 | 85.0 | 30.8 | 6.7 | 4.8 |
| 759 | 14QM124  | 30.5 | 85.7 | 30.6 | 6.8 | 5.4 |
| 760 | 14QM125  | 28.4 | 84.7 | 28.6 | 6.7 | 5.1 |
| 761 | 14QM125H | 25.9 | 81.8 | 27.6 | 6.6 | 5.2 |
| 762 | P♀       | 30.1 | 86.3 | 30.5 | 6.8 | 5.0 |
| 763 | 14QM126H | 28.1 | 83.2 | 29.8 | 6.7 | 5.9 |
| 764 | 14QM126  | 28.5 | 86.0 | 30.0 | 6.8 | 5.6 |



|     |          |      |      |      |     |     |
|-----|----------|------|------|------|-----|-----|
| 765 | 14QM127  | 30.8 | 86.0 | 30.1 | 6.8 | 4.6 |
| 766 | 14QM127H | 30.9 | 86.7 | 31.7 | 6.8 | 4.6 |
| 767 | P♀       | 30.1 | 86.3 | 30.5 | 6.8 | 5.0 |
| 768 | 14QM128H | 29.2 | 84.3 | 31.2 | 6.8 | 4.9 |
| 769 | 14QM128  | 30.8 | 80.0 | 32.5 | 6.9 | 4.2 |
| 770 | 14QM129  | 28.4 | 84.4 | 28.5 | 6.7 | 5.1 |
| 771 | 14QM129H | 31.4 | 85.5 | 30.4 | 6.8 | 5.7 |
| 772 | P♀       | 30.1 | 86.3 | 30.5 | 6.8 | 5.0 |
| 773 | 14QM130H | 30.2 | 85.7 | 30.3 | 6.9 | 5.1 |
| 774 | 14QM130  | 30.9 | 85.5 | 30.6 | 6.8 | 4.6 |
| 775 | 14QM131  | 29.2 | 83.7 | 29.4 | 6.7 | 4.7 |
| 776 | 14QM131H | 29.3 | 86.7 | 30.0 | 6.8 | 5.2 |
| 777 | P♀       | 30.1 | 86.3 | 30.5 | 6.8 | 5.0 |
| 778 | 14QM132H | 29.1 | 85.6 | 29.2 | 6.7 | 5.8 |
| 779 | 14QM132  | 27.9 | 85.2 | 27.9 | 6.7 | 5.0 |
| 780 | 14QM133  | 27.9 | 86.5 | 29.4 | 6.7 | 5.5 |
| 781 | 14QM133H | 29.8 | 84.0 | 30.9 | 6.8 | 5.4 |
| 782 | P♀       | 30.1 | 86.3 | 30.5 | 6.8 | 5.0 |
| 783 | 14QM134H | 29.4 | 85.6 | 28.6 | 6.7 | 5.4 |
| 784 | 14QM134  | 27.9 | 83.0 | 28.0 | 6.6 | 5.1 |
| 785 | 14QM135  | 31.2 | 86.5 | 31.8 | 6.8 | 5.0 |
| 786 | 14QM135H | 31.2 | 85.0 | 30.0 | 6.9 | 5.6 |
| 787 | P♀       | 30.1 | 86.3 | 30.5 | 6.8 | 5.0 |
| 788 | 14QM136H | 28.2 | 83.8 | 30.7 | 6.7 | 5.2 |
| 789 | 14QM136  | 31.2 | 85.2 | 32.2 | 6.9 | 5.1 |
| 790 | 14QM137  | 30.0 | 83.5 | 31.6 | 6.7 | 4.6 |
| 791 | 14QM137H | 30.5 | 84.6 | 31.8 | 6.8 | 4.4 |
| 792 | P♀       | 30.1 | 86.3 | 30.5 | 6.8 | 5.0 |
| 793 | 14QM138H | 28.3 | 82.6 | 29.9 | 6.7 | 5.2 |
| 794 | 14QM138  | 29.5 | 83.3 | 29.4 | 6.7 | 5.1 |
| 795 | 14QM139  | 29.9 | 86.6 | 29.6 | 6.8 | 5.0 |
| 796 | 14QM139H | 29.3 | 84.9 | 29.4 | 6.7 | 5.1 |
| 797 | P♀       | 30.1 | 86.3 | 30.5 | 6.8 | 5.0 |
| 798 | 14QM140H | 30.6 | 86.9 | 29.7 | 6.8 | 5.2 |
| 799 | 14QM140  | 30.4 | 86.5 | 30.7 | 6.8 | 5.7 |
| 800 | 14QM141  | 28.8 | 83.6 | 29.6 | 6.7 | 4.7 |
| 801 | 14QM141H | 30.0 | 86.1 | 30.3 | 6.8 | 5.1 |
| 802 | P♀       | 27.5 | 84.8 | 27.7 | 6.6 | 5.5 |
| 803 | 14QM142H | 29.0 | 81.7 | 29.7 | 6.7 | 5.2 |
| 804 | 14QM142  | 29.4 | 85.7 | 29.2 | 6.8 | 5.3 |
| 805 | 14QM143  | 29.8 | 84.0 | 28.3 | 6.7 | 5.0 |
| 806 | 14QM143H | 29.7 | 86.3 | 28.8 | 6.7 | 5.4 |
| 807 | P♀       | 27.5 | 84.8 | 27.7 | 6.6 | 5.5 |
| 808 | 14QM144H | 30.5 | 86.9 | 29.6 | 6.8 | 5.1 |
| 809 | 14QM144  | 26.6 | 83.8 | 26.5 | 6.5 | 5.3 |
| 810 | 14QM145  | 27.8 | 83.2 | 27.9 | 6.6 | 4.5 |
| 811 | 14QM145H | 29.6 | 87.5 | 29.6 | 6.7 | 5.0 |
| 812 | P♀       | 27.5 | 84.8 | 27.7 | 6.6 | 5.5 |
| 813 | 14QM146H | 30.2 | 86.5 | 29.4 | 6.8 | 5.3 |
| 814 | 14QM146  | 25.8 | 83.3 | 26.1 | 6.5 | 4.8 |
| 815 | 14QM147  | 29.2 | 87.0 | 27.9 | 6.7 | 4.8 |
| 816 | 14QM147H | 30.4 | 86.0 | 29.8 | 6.8 | 5.2 |
| 817 | P♀       | 27.5 | 84.8 | 27.7 | 6.6 | 5.5 |
| 818 | 14QM148H | 31.1 | 87.2 | 30.2 | 6.9 | 5.2 |
| 819 | 14QM148  | 29.8 | 87.3 | 28.2 | 6.7 | 4.9 |
| 820 | 14QM149  | 28.9 | 84.6 | 29.5 | 6.7 | 4.4 |
| 821 | 14QM149H | 28.9 | 86.5 | 28.3 | 6.6 | 5.1 |
| 822 | P♀       | 27.5 | 84.8 | 27.7 | 6.6 | 5.5 |
| 823 | 14QM150H | 30.7 | 87.9 | 29.3 | 6.8 | 5.1 |

|     |          |      |      |      |     |     |
|-----|----------|------|------|------|-----|-----|
| 824 | 14QM150  | 28.4 | 85.4 | 27.3 | 6.7 | 5.2 |
| 825 | 14QM151  | 29.3 | 87.6 | 27.9 | 6.7 | 5.4 |
| 826 | 14QM151H | 29.2 | 87.7 | 29.0 | 6.7 | 5.3 |
| 827 | P♀       | 27.5 | 84.8 | 27.7 | 6.6 | 5.5 |
| 828 | 14QM152H | 27.7 | 83.6 | 27.2 | 6.6 | 5.7 |
| 829 | 14QM152  | 28.0 | 85.8 | 28.6 | 6.7 | 5.0 |
| 830 | 14QM153  | 28.0 | 88.0 | 27.8 | 6.7 | 5.7 |
| 831 | 14QM153H | 28.2 | 84.7 | 26.2 | 6.6 | 5.9 |
| 832 | P♀       | 27.5 | 84.8 | 27.7 | 6.6 | 5.5 |
| 833 | 14QM154H | 28.4 | 84.0 | 30.7 | 6.8 | 5.1 |
| 834 | 14QM154  | 30.3 | 86.2 | 30.5 | 6.8 | 5.0 |
| 835 | 14QM155  | 28.7 | 84.1 | 29.3 | 6.6 | 5.2 |
| 836 | 14QM155H | 28.3 | 85.6 | 29.3 | 6.7 | 5.0 |
| 837 | P♀       | 27.5 | 84.8 | 27.7 | 6.6 | 5.5 |
| 838 | 14QM156H | 29.4 | 86.3 | 29.6 | 6.8 | 5.3 |
| 839 | 14QM156  | 28.6 | 85.8 | 28.5 | 6.6 | 4.9 |
| 840 | 14QM157  | 29.4 | 84.8 | 30.1 | 6.8 | 5.3 |
| 841 | 14QM157H | 28.9 | 87.4 | 29.4 | 6.7 | 5.8 |
| 842 | P♀       | 27.5 | 84.8 | 27.7 | 6.6 | 5.5 |
| 843 | 14QM158H | 29.1 | 85.9 | 28.2 | 6.7 | 5.3 |
| 844 | 14QM158  | 25.9 | 83.0 | 25.1 | 6.5 | 5.2 |
| 845 | 14QM159  | 30.4 | 85.5 | 28.4 | 6.8 | 5.1 |
| 846 | 14QM159H | 29.2 | 84.8 | 29.5 | 6.8 | 4.8 |
| 847 | P♀       | 27.5 | 84.8 | 27.7 | 6.6 | 5.5 |
| 848 | 14QM160H | 28.8 | 86.3 | 27.9 | 6.6 | 5.6 |
| 849 | 14QM160  | 29.2 | 87.2 | 29.7 | 6.7 | 5.6 |
| 850 | 14QM161  | 27.1 | 83.8 | 26.8 | 6.6 | 4.9 |
| 851 | 14QM161H | 27.4 | 85.2 | 25.4 | 6.5 | 5.3 |
| 852 | P♀       | 29.5 | 86.1 | 28.3 | 6.7 | 5.6 |
| 853 | 14QM162H | 28.7 | 85.9 | 27.5 | 6.7 | 6.0 |
| 854 | 14QM162  | 28.0 | 87.2 | 27.3 | 6.6 | 5.6 |
| 855 | 14QM163  | 29.8 | 86.6 | 28.9 | 6.8 | 4.9 |
| 856 | 14QM163H | 29.4 | 87.4 | 29.6 | 6.7 | 4.8 |
| 857 | P♀       | 29.5 | 86.1 | 28.3 | 6.7 | 5.6 |
| 858 | 14QM164H | 29.9 | 86.1 | 29.8 | 6.8 | 5.4 |
| 859 | 14QM164  | 27.5 | 83.7 | 28.7 | 6.7 | 5.2 |
| 860 | 14QM165  | 30.4 | 85.5 | 30.8 | 6.7 | 4.8 |
| 861 | 14QM165H | 28.8 | 85.8 | 31.3 | 6.7 | 5.4 |
| 862 | P♀       | 29.5 | 86.1 | 28.3 | 6.7 | 5.6 |
| 863 | 14QM166H | 31.0 | 87.1 | 30.2 | 6.8 | 5.5 |
| 864 | 14QM166  | 28.7 | 85.2 | 30.6 | 6.7 | 5.3 |
| 865 | 14QM167  | 30.1 | 84.3 | 30.8 | 6.7 | 4.6 |
| 866 | 14QM167H | 27.7 | 82.7 | 28.8 | 6.7 | 5.5 |
| 867 | P♀       | 29.5 | 86.1 | 28.3 | 6.7 | 5.6 |
| 868 | 14QM168H | 27.9 | 82.4 | 28.9 | 6.7 | 5.3 |
| 869 | 14QM168  | 27.1 | 83.5 | 27.6 | 6.6 | 5.5 |
| 870 | 14QM169  | 25.8 | 81.8 | 25.9 | 6.5 | 5.4 |
| 871 | 14QM169H | 28.3 | 84.4 | 28.3 | 6.7 | 5.6 |
| 872 | P♀       | 29.5 | 86.1 | 28.3 | 6.7 | 5.6 |
| 873 | 14QM170H | 28.9 | 83.5 | 29.1 | 6.7 | 5.0 |
| 874 | 14QM170  | 28.9 | 85.3 | 28.9 | 6.7 | 5.2 |
| 875 | 14QM171  | 30.0 | 86.8 | 30.0 | 6.7 | 4.4 |
| 876 | 14QM171H | 29.9 | 86.7 | 28.8 | 6.7 | 5.1 |
| 877 | P♀       | 29.5 | 86.1 | 28.3 | 6.7 | 5.6 |
| 878 | 14QM172H | 28.3 | 83.1 | 26.0 | 6.6 | 5.3 |
| 879 | 14QM172  | 28.2 | 84.2 | 27.0 | 6.6 | 5.1 |
| 880 | 14QM173  | 29.9 | 83.9 | 29.2 | 6.7 | 4.8 |
| 881 | 14QM173H | 28.9 | 83.8 | 27.9 | 6.6 | 4.7 |
| 882 | P♀       | 29.5 | 86.1 | 28.3 | 6.7 | 5.6 |

|     |          |      |      |      |     |     |
|-----|----------|------|------|------|-----|-----|
| 883 | 14QM174H | 28.7 | 85.5 | 29.1 | 6.7 | 4.8 |
| 884 | 14QM174  | 29.4 | 85.4 | 29.8 | 6.7 | 4.7 |
| 885 | 14QM175  | 30.1 | 85.5 | 30.3 | 6.9 | 5.3 |
| 886 | 14QM175H | 27.6 | 83.0 | 29.5 | 6.7 | 5.8 |
| 887 | P♀       | 29.5 | 86.1 | 28.3 | 6.7 | 5.6 |
| 888 | 14QM176H | 31.2 | 86.3 | 30.2 | 6.8 | 5.2 |
| 889 | 14QM176  | 30.5 | 85.6 | 31.3 | 6.7 | 4.6 |
| 890 | 14QM177  | 28.5 | 83.7 | 28.5 | 6.6 | 4.8 |
| 891 | 14QM177H | 29.7 | 86.5 | 28.8 | 6.7 | 5.1 |
| 892 | P♀       | 29.5 | 86.1 | 28.3 | 6.7 | 5.6 |
| 893 | 14QM178H | 30.5 | 84.7 | 30.7 | 6.8 | 5.0 |
| 894 | 14QM178  | 29.3 | 82.1 | 31.0 | 6.7 | 4.4 |
| 895 | 14QM179  | 29.3 | 84.5 | 30.4 | 6.8 | 5.3 |
| 896 | 14QM179H | 29.7 | 85.1 | 29.1 | 6.8 | 5.5 |
| 897 | P♀       | 29.5 | 86.1 | 28.3 | 6.7 | 5.6 |
| 898 | P♂       | 29.2 | 87.3 | 29.0 | 6.7 | 5.1 |
| 899 | F1       | 30.3 | 87.1 | 29.9 | 6.7 | 4.9 |
| 900 | P♀       | 30.1 | 84.4 | 30.3 | 6.8 | 5.8 |

Note: 14QM003- 14QM179 refer to 177 RILs. 14QM003H - 14QM179H refer to 177 F<sub>14</sub>BC progenies in BC/M population.

**Table S8 Genotypes of RIL (A), BC/M (B) and BC/P (C) populations.**

**A. Genotypes of RIL population.**

| Number | Marker    | 1 | 2 | 3 | 4 | 5 | 6 | 7 | 8 | 9 | 10 | 11 | 12 | 13 | 14 | 15 | 16 | 17 | 18 | 19 |
|--------|-----------|---|---|---|---|---|---|---|---|---|----|----|----|----|----|----|----|----|----|----|
| 1      | *BNL1026  | A | B | A | A | A | B | A | A | A | B  | B  | B  | B  | B  | A  | A  | -  | A  | A  |
| 2      | *BNL1053  | B | B | B | B | B | A | - | A | A | B  | A  | A  | B  | A  | A  | B  | A  | A  | B  |
| 3      | *BNL1167  | A | B | A | B | A | A | B | B | A | A  | B  | A  | A  | A  | A  | B  | B  | B  | B  |
| 4      | *BNL1317  | A | B | - | B | B | B | B | B | A | A  | B  | A  | A  | A  | B  | B  | B  | A  | B  |
| 5      | *BNL1495  | A | A | B | B | A | A | A | A | B | A  | B  | A  | A  | B  | A  | B  | A  | A  | A  |
| 6      | *BNL1521  | A | A | B | A | B | A | A | A | A | B  | B  | A  | B  | A  | A  | B  | A  | B  | B  |
| 7      | *BNL1552  | A | B | A | A | B | B | A | B | B | A  | B  | B  | B  | A  | A  | B  | B  | A  | B  |
| 8      | *BNL243   | A | A | A | A | A | B | A | A | A | B  | B  | B  | A  | A  | B  | A  | A  | B  | B  |
| 9      | *BNL2449  | A | A | B | B | A | B | B | A | B | A  | A  | B  | A  | B  | A  | B  | B  | A  | A  |
| 10     | *BNL2485  | A | A | A | A | A | B | A | B | A | B  | B  | B  | B  | B  | -  | B  | B  | B  | B  |
| 11     | *BNL2495  | A | B | B | B | A | A | B | B | B | B  | B  | A  | A  | B  | A  | A  | A  | A  | B  |
| 12     | *BNL2496  | A | A | B | B | B | B | B | B | A | A  | B  | B  | B  | A  | A  | B  | A  | A  | A  |
| 13     | *BNL2827a | A | A | A | A | A | B | A | A | A | B  | A  | A  | B  | A  | B  | B  | A  | B  | A  |
| 14     | *BNL2827b | A | A | A | A | A | B | A | A | A | B  | A  | A  | B  | A  | B  | B  | A  | B  | A  |
| 15     | *BNL2877  | A | A | B | B | A | B | B | A | A | A  | A  | A  | B  | B  | B  | A  | A  | A  | B  |
| 16     | *BNL2960  | B | B | - | A | B | A | - | B | A | A  | A  | B  | A  | B  | B  | A  | B  | B  | A  |
| 17     | *BNL3171  | B | A | - | A | A | A | A | B | A | B  | A  | B  | A  | A  | A  | B  | A  | A  | B  |
| 18     | *BNL3261  | B | A | - | A | A | A | B | - | A | A  | B  | A  | A  | A  | -  | B  | B  | B  | B  |
| 19     | *BNL3442a | B | A | B | B | B | A | B | A | A | B  | A  | A  | B  | A  | B  | B  | A  | B  | B  |
| 20     | *BNL3442b | A | A | B | B | A | A | B | A | B | B  | A  | B  | B  | B  | B  | B  | B  | A  | A  |
| 21     | *BNL3594  | B | B | A | B | A | B | B | B | A | A  | B  | B  | A  | B  | A  | B  | B  | B  | A  |
| 22     | *BNL3650  | A | A | - | A | B | B | - | A | B | A  | A  | B  | B  | A  | B  | B  | B  | A  | B  |
| 23     | *BNL3661  | A | A | A | A | A | A | A | A | A | A  | A  | A  | A  | B  | A  | A  | A  | A  | B  |
| 24     | *BNL3937  | B | B | B | B | B | B | B | B | A | B  | A  | B  | B  | A  | B  | A  | A  | B  | B  |
| 25     | *BNL4028  | B | B | A | A | B | B | A | A | B | A  | B  | A  | A  | A  | A  | A  | B  | B  | -  |
| 26     | *BNL4030  | A | B | A | A | B | A | A | A | B | A  | A  | A  | A  | B  | A  | A  | B  | A  | B  |
| 27     | *BNL530   | A | B | A | B | A | A | B | B | A | A  | B  | A  | B  | B  | A  | A  | A  | B  | B  |
| 28     | *BNL598   | A | A | B | B | B | A | B | A | B | B  | A  | A  | A  | A  | A  | A  | A  | B  | B  |
| 29     | *C2-0011B | B | A | B | B | A | B | A | A | A | A  | A  | A  | B  | A  | A  | A  | A  | A  | A  |
| 30     | *C2-0115  | B | A | - | A | A | A | - | B | A | B  | A  | A  | A  | A  | B  | B  | B  | B  | B  |
| 31     | *C2-0135  | A | B | B | B | B | A | B | - | B | B  | B  | A  | A  | B  | A  | A  | A  | A  | B  |
| 32     | *CAU0003  | B | B | B | A | A | A | A | A | A | A  | A  | A  | B  | B  | A  | B  | A  | A  | A  |
| 33     | *CAU0104  | B | A | A | B | A | A | A | A | B | A  | A  | A  | B  | B  | A  | A  | A  | A  | B  |
| 34     | *CAU0161  | A | A | A | A | B | A | A | A | B | A  | A  | A  | A  | A  | A  | A  | B  | A  | B  |
| 35     | *CER0028  | A | B | - | A | A | B | A | B | B | B  | B  | A  | A  | A  | A  | B  | B  | A  | A  |
| 36     | *CER0036  | B | A | B | A | A | B | A | A | B | A  | A  | B  | A  | A  | B  | A  | B  | B  | A  |
| 37     | *CER0042  | B | B | B | B | A | B | B | B | A | B  | A  | B  | B  | A  | B  | A  | A  | B  | B  |

|    |          |   |   |   |   |   |   |   |   |   |   |   |   |   |   |   |   |   |   |   |
|----|----------|---|---|---|---|---|---|---|---|---|---|---|---|---|---|---|---|---|---|---|
| 38 | *CER0098 | A | A | A | A | B | A | A | B | B | A | B | B | B | B | A | A | A | B | A |
| 39 | *CER0144 | A | A | A | A | B | A | A | B | B | B | B | A | A | B | A | A | A | A | B |
| 40 | *CER0165 | A | A | B | B | B | A | A | A | B | A | A | A | A | B | A | B | B | A | A |
| 41 | *CER0167 | B | A | A | A | B | B | A | B | B | A | A | B | B | A | B | B | B | A | B |
| 42 | *CER0168 | A | A | A | A | A | A | A | A | A | B | B | B | A | A | B | A | A | B | B |
| 43 | *CGR5001 | B | A | A | A | B | B | A | A | A | B | A | A | B | A | A | A | A | A | A |
| 44 | *CGR5009 | B | A | B | B | B | A | B | A | A | A | B | A | A | A | B | B | B | B | B |
| 45 | *CGR5025 | B | B | A | A | A | A | A | A | A | A | B | B | A | A | B | B | B | B | B |
| 46 | *CGR5056 | A | A | - | B | B | B | B | A | A | A | A | A | A | A | A | A | A | A | A |
| 47 | *CGR5108 | A | A | - | A | A | B | A | A | A | A | B | A | A | - | A | B | B | B | A |
| 48 | *CGR5111 | B | A | - | A | A | A | - | B | A | B | B | A | A | A | B | B | B | B | B |
| 49 | *CGR5124 | B | A | A | A | A | A | A | A | A | A | B | A | A | B | B | B | A | B |   |
| 50 | *CGR5202 | B | A | B | A | B | B | A | A | B | B | B | B | B | A | A | A | B | B | A |
| 51 | *CGR5217 | B | A | B | A | B | A | A | A | A | B | A | B | B | A | A | B | B | A | A |
| 52 | *CGR5331 | A | A | B | B | B | A | B | A | B | B | A | B | A | B | B | A | B | A | B |
| 53 | *CGR5352 | A | A | A | A | A | B | - | A | A | B | B | B | A | A | B | A | A | B | B |
| 54 | *CGR5355 | - | A | B | A | B | B | A | A | B | A | A | B | B | A | B | B | B | A | B |
| 55 | *CGR5372 | A | A | A | A | B | B | - | A | B | A | A | B | A | B | B | B | B | A | B |
| 56 | *CGR5390 | A | A | A | A | A | A | - | A | B | A | B | B | A | B | B | A | B | A | A |
| 57 | *CGR5421 | A | A | B | B | A | A | B | B | B | - | - | B | A | B | A | A | B | A | A |
| 58 | *CGR5423 | A | A | B | B | A | B | B | A | A | B | B | A | A | A | B | A | A | A | B |
| 59 | *CGR5452 | A | A | A | A | B | A | A | B | B | B | B | A | A | B | A | A | A | A | B |
| 60 | *CGR5534 | A | A | B | B | A | B | B | A | A | A | A | A | B | B | B | A | B | A | A |
| 61 | *CGR5539 | B | A | A | A | A | A | A | A | A | B | A | A | A | B | A | - | A | - | B |
| 62 | *CGR5548 | B | B | B | B | A | B | B | B | A | B | A | B | A | B | A | B | A | A | A |
| 63 | *CGR5554 | A | A | B | B | B | A | B | A | B | B | A | B | A | B | B | A | B | A | - |
| 64 | *CGR5576 | B | B | B | B | A | B | B | B | B | A | A | A | A | A | A | A | A | A | A |
| 65 | *CGR5602 | B | B | A | A | B | A | A | A | A | B | A | B | A | A | A | B | A | A | B |
| 66 | *CGR5663 | A | A | A | A | A | A | A | A | A | B | B | B | A | A | B | A | B | B | A |
| 67 | *CGR5675 | A | B | B | A | A | B | A | B | A | A | A | A | A | B | A | A | A | B | B |
| 68 | *CGR5758 | B | B | A | B | B | B | B | B | A | A | B | A | A | A | B | B | B | A | B |
| 69 | *CGR5801 | B | A | B | A | A | A | B | A | B | A | B | B | B | A | B | B | B | A | B |
| 70 | *CGR5806 | B | A | B | A | A | A | A | B | A | B | A | B | A | A | A | B | A | A | B |
| 71 | *CGR5808 | B | A | B | A | A | A | A | B | A | A | A | B | B | A | A | B | B | A | A |
| 72 | *CGR5867 | A | B | A | B | B | B | B | B | A | A | B | A | A | A | B | B | B | A | B |
| 73 | *CGR5871 | A | B | A | B | B | A | B | B | A | A | B | B | B | B | A | B | B | B | A |
| 74 | *CGR5873 | A | B | A | A | A | A | A | B | A | A | A | B | A | B | A | B | B | A | B |
| 75 | *CGR5883 | B | A | B | A | B | B | A | A | B | A | A | B | B | A | B | B | B | A | B |
| 76 | *CGR6017 | B | B | A | A | A | B | A | B | B | B | A | A | A | B | B | A | A | B | A |
| 77 | *CGR6129 | A | B | A | A | A | A | A | A | A | B | B | B | A | B | A | B | A | B | B |

|     |          |   |   |   |   |   |   |   |   |   |   |   |   |   |   |   |   |   |   |   |
|-----|----------|---|---|---|---|---|---|---|---|---|---|---|---|---|---|---|---|---|---|---|
| 78  | *CGR6154 | B | B | A | B | A | A | - | B | A | A | A | B | B | B | A | B | A | B | B |
| 79  | *CGR6254 | A | A | B | - | A | A | B | B | B | B | A | B | B | B | B | B | B | B | B |
| 80  | *CGR6356 | A | A | B | B | B | B | B | A | A | A | A | B | A | A | B | A | A | A | A |
| 81  | *CGR6508 | A | A | B | B | A | A | B | B | B | B | B | B | A | A | B | A | A | A | A |
| 82  | *CGR6525 | B | A | B | A | A | A | A | B | B | B | A | A | B | B | A | A | B | A | - |
| 83  | *CGR6528 | - | A | B | A | A | A | A | B | B | B | B | A | A | B | A | B | A | A | A |
| 84  | *CGR6580 | B | B | - | A | A | A | A | A | A | A | A | A | B | B | A | B | A | A | A |
| 85  | *CGR6586 | A | A | A | A | B | B | A | A | B | A | A | B | A | B | B | B | B | A | B |
| 86  | *CGR6683 | B | A | B | B | B | B | B | A | B | A | A | A | A | A | A | A | B | A | B |
| 87  | *CGR6695 | B | A | A | A | B | B | A | A | B | A | B | B | A | A | B | B | A | B | A |
| 88  | *CGR6732 | A | A | B | B | A | B | A | A | B | A | A | B | A | B | A | B | B | A | A |
| 89  | *CGR6749 | B | B | B | A | A | B | B | A | A | A | A | B | A | A | B | B | B | A | B |
| 90  | *CGR6771 | B | A | B | B | B | A | B | A | A | A | B | A | A | A | B | B | B | B | B |
| 91  | *CGR6784 | B | B | B | B | B | B | B | A | B | A | A | A | B | A | A | A | B | A | B |
| 92  | *CGR6802 | B | - | B | B | B | B | B | A | A | A | B | A | A | B | B | A | B | A | A |
| 93  | *CGR6812 | A | A | A | A | A | A | A | A | A | B | B | B | A | A | B | A | A | B | B |
| 94  | *CGR6857 | A | A | B | B | B | B | B | A | A | A | A | A | A | A | A | A | A | A | A |
| 95  | *CGR6864 | B | B | A | B | A | A | B | B | B | B | B | B | A | B | A | B | B | B | B |
| 96  | *CGR6876 | B | B | - | B | B | B | B | B | A | A | B | A | A | A | B | B | B | A | B |
| 97  | *CGR6880 | A | A | A | A | B | A | A | B | B | B | B | A | A | B | A | A | A | A | B |
| 98  | *CGR6889 | A | B | A | A | B | A | A | A | B | A | B | B | B | A | A | B | A | B | A |
| 99  | *CGR6930 | A | A | A | A | B | A | A | B | B | B | B | A | A | B | A | A | A | A | B |
| 100 | *CIR099  | A | A | A | A | A | B | A | A | B | A | A | A | B | A | A | B | A | B | A |
| 101 | *CIR139  | A | B | A | A | B | B | A | A | A | A | A | A | B | A | A | A | B | B | B |
| 102 | *CIR216  | B | B | - | B | B | A | - | A | A | A | B | B | B | A | A | B | A | A | B |
| 103 | *CIR228  | A | A | A | A | A | B | A | B | A | B | B | A | B | B | A | B | B | B | B |
| 104 | *CIR307  | A | B | A | A | B | A | A | A | B | A | B | B | B | A | A | B | A | B | A |
| 105 | *CIR334  | A | B | A | A | B | A | A | A | B | A | B | B | B | A | A | B | A | B | A |
| 106 | *COT059  | A | B | A | A | B | A | A | A | B | A | B | B | B | A | A | B | A | B | A |
| 107 | *COT064  | A | A | B | B | B | B | - | B | A | A | B | B | B | B | A | B | B | B | A |
| 108 | *COT107  | A | A | A | B | A | A | B | A | B | B | B | A | A | B | A | A | B | A | B |
| 109 | *DC20046 | A | A | B | B | B | B | - | A | A | A | A | A | A | A | A | A | A | A | A |
| 110 | *DC20094 | A | A | - | B | B | A | B | B | A | A | A | B | A | B | A | A | A | A | A |
| 111 | *DC20124 | B | A | B | B | A | B | B | A | A | A | A | A | B | A | A | A | A | A | A |
| 112 | *DC20127 | B | A | A | A | A | A | A | B | A | B | A | A | A | A | B | A | B | B | A |
| 113 | *DC30107 | A | B | B | - | B | - | - | - | B | B | B | A | A | B | A | A | A | A | B |
| 114 | *DC40052 | A | A | B | B | B | B | - | A | A | A | A | A | A | A | A | A | A | A | A |
| 115 | *DC40065 | B | A | B | B | A | B | - | A | A | A | A | A | B | A | A | A | A | A | A |
| 116 | *DC40122 | A | B | A | A | B | B | A | A | A | A | A | A | B | A | A | A | B | B | B |
| 117 | *DC40150 | A | B | B | B | B | B | B | A | B | B | A | B | B | B | A | B | B | B | A |

|     |           |   |   |   |   |   |   |   |   |   |   |   |   |   |   |   |   |   |
|-----|-----------|---|---|---|---|---|---|---|---|---|---|---|---|---|---|---|---|---|
| 118 | *DC40175  | A | B | A | A | A | A | A | A | B | A | B | A | B | B | A | B | A |
| 119 | *DC40183  | A | B | A | A | A | A | B | A | B | A | B | A | B | B | A | B | A |
| 120 | *DC40250  | B | B | - | A | A | A | A | A | A | - | A | B | B | A | B | A | A |
| 121 | *DC40407  | A | B | B | B | A | A | B | B | A | A | A | B | A | B | B | B | A |
| 122 | *DC40417  | B | A | - | A | B | B | A | A | B | A | A | B | B | A | B | B | A |
| 123 | *DPL0003  | - | - | - | - | - | - | - | - | - | A | A | B | A | A | B | A | A |
| 124 | *DPL0022  | B | B | A | A | A | A | B | B | A | A | B | B | A | A | B | B | B |
| 125 | *DPL0048  | A | B | A | A | A | B | A | - | A | B | B | B | B | B | A | A | A |
| 126 | *DPL0050a | B | B | A | A | A | A | A | B | A | B | A | B | A | A | A | B | A |
| 127 | *DPL0050b | B | A | B | A | A | A | A | A | A | A | A | B | B | A | B | B | A |
| 128 | *DPL0056  | B | A | B | B | A | A | B | A | B | A | A | A | B | B | A | A | A |
| 129 | *DPL0057  | A | A | B | A | A | A | A | B | B | B | A | B | B | B | B | A | B |
| 130 | *DPL0070  | A | B | B | B | B | A | B | B | B | B | B | A | A | B | A | A | A |
| 131 | *DPL0090  | A | B | A | A | B | A | - | A | A | B | - | B | A | B | A | B | A |
| 132 | *DPL0131  | B | A | B | B | B | A | B | A | A | B | A | A | B | A | B | B | B |
| 133 | *DPL0152a | A | A | A | A | B | A | A | A | B | B | A | B | A | A | B | A | A |
| 134 | *DPL0152b | A | A | B | B | A | B | B | A | A | B | B | A | A | A | B | A | A |
| 135 | *DPL0182  | A | B | A | A | - | A | A | - | B | A | B | B | B | A | A | B | A |
| 136 | *DPL0217  | B | A | B | A | B | B | A | A | B | A | B | B | A | A | B | B | A |
| 137 | *DPL0244  | B | A | B | A | B | B | A | A | - | A | A | - | B | A | B | B | A |
| 138 | *DPL0252  | B | A | A | A | A | A | B | - | A | B | B | A | A | A | B | A | B |
| 139 | *DPL0282  | A | A | B | A | B | A | A | B | A | A | A | A | A | B | A | B | B |
| 140 | *DPL0303  | A | A | A | B | A | A | B | A | B | B | B | A | A | B | A | A | B |
| 141 | *DPL0308  | A | - | B | B | B | B | B | A | B | A | A | A | A | B | A | B | A |
| 142 | *DPL0319  | A | A | A | A | B | - | - | A | A | B | A | B | A | A | - | A | B |
| 143 | *DPL0491  | A | B | A | A | B | A | A | B | B | B | B | A | A | B | A | A | A |
| 144 | *DPL0502  | A | A | A | A | A | B | A | B | A | B | B | A | B | B | A | B | B |
| 145 | *DPL0535  | A | A | B | B | B | B | A | A | B | A | A | A | A | B | A | B | B |
| 146 | *DPL0562  | B | B | A | B | A | A | A | A | A | B | A | A | A | A | A | A | B |
| 147 | *DPL0565  | A | A | A | B | B | B | B | A | A | A | A | A | A | B | A | A | B |
| 148 | *DPL0572  | A | A | B | B | A | B | B | A | B | A | A | B | A | B | A | B | B |
| 149 | *DPL0590  | B | A | A | A | A | A | - | A | A | A | A | B | A | A | B | B | B |
| 150 | *DPL0707  | A | B | A | B | A | B | B | B | B | A | B | A | A | A | A | B | A |
| 151 | *DPL0732  | A | A | A | B | A | A | B | A | B | B | B | A | A | B | A | A | B |
| 152 | *DPL0752  | A | A | B | B | B | B | B | A | A | A | A | A | A | A | A | A | A |
| 153 | *DPL0777  | B | A | A | A | A | A | A | A | A | B | A | B | B | A | A | B | B |
| 154 | *DPL0790  | A | B | A | A | A | A | A | B | A | B | B | B | A | B | A | B | B |
| 155 | *DPL0847a | A | A | B | B | B | B | B | A | A | A | A | A | A | A | A | A | A |
| 156 | *DPL0847b | B | B | - | A | A | B | - | A | A | A | A | B | A | A | B | B | B |
| 157 | *DPL0864  | A | B | A | A | A | B | A | A | B | B | A | B | B | A | A | A | B |

|     |          |   |   |   |   |   |   |   |   |   |   |   |   |   |   |   |   |   |   |   |   |
|-----|----------|---|---|---|---|---|---|---|---|---|---|---|---|---|---|---|---|---|---|---|---|
| 158 | *DPL0883 | A | A | B | B | B | B | - | B | A | A | B | B | B | B | A | B | B | B | A |   |
| 159 | *DPL0894 | A | A | A | A | A | A | - | A | B | A | B | B | A | B | B | A | B | A | A |   |
| 160 | *DPL0897 | A | B | A | A | A | B | A | A | A | B | B | B | B | B | B | A | A | A | A |   |
| 161 | *Gh111   | A | A | A | B | A | B | B | B | B | B | A | A | B | A | B | B | B | B | B |   |
| 162 | *Gh120   | A | A | A | B | B | B | A | A | A | A | A | A | A | B | A | A | B | A | B |   |
| 163 | *Gh137   | A | B | A | A | A | B | - | A | A | B | B | B | B | B | B | A | A | A | A |   |
| 164 | *Gh144   | A | B | A | B | A | B | - | B | B | A | B | A | A | A | A | A | B | A | A |   |
| 165 | *Gh145   | A | B | B | B | B | B | B | A | B | B | A | B | B | A | B | B | A | B | A |   |
| 166 | *Gh157   | A | A | B | B | A | A | B | A | B | A | B | B | A | B | A | B | A | A | A |   |
| 167 | *Gh158   | A | B | A | B | A | A | B | B | A | A | A | A | B | A | B | B | B | A | B |   |
| 168 | *Gh197   | A | A | - | B | B | A | B | B | A | A | A | A | A | A | B | A | A | A | A |   |
| 169 | *Gh199   | B | B | A | A | B | A | A | B | A | A | A | B | A | B | B | A | B | B | A |   |
| 170 | *Gh220   | B | B | B | B | A | - | B | B | A | B | A | B | B | A | B | A | A | B | B |   |
| 171 | *Gh247   | A | B | - | B | B | B | B | B | A | A | B | A | A | A | B | B | B | A | B |   |
| 172 | *Gh256   | A | A | A | A | B | A | A | B | B | A | B | B | B | B | A | A | A | B | A |   |
| 173 | *Gh260   | A | A | B | B | B | B | B | B | A | A | B | B | A | A | B | A | B | B | B |   |
| 174 | *Gh268   | B | A | - | A | A | A | A | A | B | B | A | A | B | A | A | B | B | A | A |   |
| 175 | *Gh27    | A | A | A | B | A | B | B | B | B | B | A | A | B | A | B | B | B | B | B |   |
| 176 | *Gh273   | A | A | B | A | B | A | - | A | B | B | B | A | A | A | B | B | A | A | B |   |
| 177 | *Gh298   | B | A | A | A | B | B | A | A | B | B | B | B | B | A | A | A | B | B | A |   |
| 178 | *Gh308   | A | B | A | B | B | B | B | A | B | B | A | B | B | A | B | B | A | B | A |   |
| 179 | *Gh316   | A | A | - | A | A | A | - | A | A | A | B | B | A | B | B | B | B | B | A |   |
| 180 | *Gh320   | A | B | A | - | A | B | - | B | B | A | B | A | A | A | A | A | B | - | A |   |
| 181 | *Gh327   | A | B | A | A | B | A | A | B | B | B | B | A | A | A | A | A | B | B | A |   |
| 182 | *Gh388   | B | B | A | A | A | A | - | A | A | A | B | B | B | A | B | A | B | A | A |   |
| 183 | *Gh398   | A | B | A | A | A | A | A | A | A | B | B | B | A | B | A | B | A | B | B |   |
| 184 | *Gh451   | A | B | B | A | B | B | A | B | B | A | B | B | B | A | A | B | B | A | B |   |
| 185 | *Gh454   | B | A | A | A | A | A | A | A | B | B | B | A | B | A | A | B | B | A | A |   |
| 186 | *Gh474   | A | B | - | B | B | B | B | A | B | B | - | B | B | A | B | B | A | B | A |   |
| 187 | *Gh499   | A | A | - | B | A | B | B | B | B | B | A | A | B | A | B | B | B | B | B |   |
| 188 | *Gh501   | A | - | A | A | A | B | A | A | B | B | A | B | B | A | B | A | A | B | B |   |
| 189 | *Gh529   | A | A | B | A | A | B | A | B | A | A | B | A | A | A | B | B | B | B | B |   |
| 190 | *Gh56    | B | A | B | B | A | B | B | A | B | A | B | A | B | A | A | A | A | A | A |   |
| 191 | *Gh60    | A | B | A | A | A | B | A | A | B | B | A | B | B | A | B | A | A | B | B |   |
| 192 | *Gh616   | A | B | A | A | B | B | A | A | A | A | A | A | A | B | A | A | A | B | B | B |
| 193 | *Gh631   | B | A | - | B | A | A | B | A | B | B | B | A | A | B | A | A | B | A | B |   |
| 194 | *Gh64    | B | A | B | B | A | A | A | A | B | A | B | A | B | B | A | A | B | A | B |   |
| 195 | *Gh663   | A | B | - | A | A | A | A | B | B | B | B | A | A | B | A | B | B | A | A |   |
| 196 | *Gh72    | A | B | A | A | B | B | A | A | A | A | A | A | B | A | A | A | B | B | B |   |
| 197 | *HAU0250 | A | A | A | A | A | B | - | A | A | B | B | B | A | A | B | A | A | B | B |   |



|     |           |   |   |   |   |   |   |   |   |   |   |   |   |   |   |   |   |   |   |   |
|-----|-----------|---|---|---|---|---|---|---|---|---|---|---|---|---|---|---|---|---|---|---|
| 198 | *HAU0423  | B | A | B | A | A | A | A | B | A | B | A | A | A | B | A | A | B |   |   |
| 199 | *HAU0483  | B | A | - | A | B | B | A | A | B | A | A | B | B | A | B | B | A | B |   |
| 200 | *HAU0635  | A | B | A | B | B | B | - | B | A | A | B | B | A | B | A | A | B | A | B |
| 201 | *HAU0639  | A | A | B | A | A | A | B | A | A | A | B | B | A | B | B | B | B | B | A |
| 202 | *HAU0878  | A | B | A | A | B | B | A | A | A | A | A | A | B | A | A | A | B | B | B |
| 203 | *HAU0921  | B | A | A | A | B | B | A | A | B | A | A | B | B | A | B | B | B | A | B |
| 204 | *HAU1001  | A | B | A | A | A | A | A | A | A | A | A | B | A | B | A | A | B | A | B |
| 205 | *HAU1057  | B | A | A | B | B | B | B | A | B | A | A | A | A | A | A | A | B | A | B |
| 206 | *HAU1129  | B | A | A | A | B | B | A | A | A | B | B | B | A | A | B | A | B | A | A |
| 207 | *HAU1316  | A | B | B | B | A | A | B | A | A | A | A | B | B | A | A | A | B | A | A |
| 208 | *HAU1321  | A | B | B | B | A | A | B | A | A | A | A | B | B | A | A | A | B | A | A |
| 209 | *HAU1332  | - | - | - | - | - | - | - | - | - | - | - | - | - | - | - | - | - | - | - |
| 210 | *HAU1371  | B | B | A | A | A | B | A | A | A | A | A | B | A | A | B | B | B | A | B |
| 211 | *HAU1378  | A | A | A | A | A | B | A | A | A | A | A | B | A | A | B | A | B | B | A |
| 212 | *HAU1382  | B | B | B | B | B | B | B | A | A | A | B | A | A | B | B | B | A | A | A |
| 213 | *HAU1413  | B | B | A | A | A | B | A | B | B | B | A | B | A | B | B | A | A | B | A |
| 214 | *HAU1417  | A | A | A | A | A | A | A | A | A | B | A | B | A | A | B | A | A | B | A |
| 215 | *HAU1455  | A | B | B | B | B | B | B | A | A | A | A | A | A | B | A | A | A | A | B |
| 216 | *HAU1460  | A | - | A | A | A | A | A | A | A | A | A | B | A | A | B | B | B | A | B |
| 217 | *HAU1470a | A | B | B | B | A | A | B | B | B | A | A | B | A | B | B | A | A | A | A |
| 218 | *HAU1470b | A | B | A | B | A | A | A | A | A | A | A | B | A | B | B | A | A | A | A |
| 219 | *HAU1483a | A | B | B | B | B | B | B | A | B | B | A | B | B | A | B | B | A | B | A |
| 220 | *HAU1483b | A | B | B | B | B | B | B | A | B | B | A | B | B | A | B | B | A | B | A |
| 221 | *HAU1571  | A | A | B | B | B | A | B | A | B | B | A | A | A | A | A | A | A | B | B |
| 222 | *HAU1603  | B | B | B | A | A | A | B | A | A | A | B | B | B | A | B | A | B | A | A |
| 223 | *HAU1618  | B | A | A | A | B | A | A | B | A | A | B | A | B | A | B | B | B | B | B |
| 224 | *HAU190   | B | A | A | A | B | A | A | B | A | B | B | A | B | A | B | B | A | B | B |
| 225 | *HAU2004  | B | B | A | A | B | A | A | - | A | B | A | B | A | A | A | B | A | A | B |
| 226 | *HAU2424  | A | B | B | A | - | - | - | - | B | B | B | A | B | B | A | B | B | A | A |
| 227 | *HAU2504  | A | - | A | A | B | A | A | A | B | B | B | B | B | A | A | B | A | A | B |
| 228 | *HAU2558  | A | A | B | B | A | B | - | A | B | A | A | B | A | B | A | A | A | A | A |
| 229 | *HAU2625  | B | A | B | A | B | B | A | A | B | A | A | B | B | A | B | B | B | A | B |
| 230 | *HAU2768  | B | A | B | A | B | B | B | - | B | A | A | B | B | A | B | B | B | A | B |
| 231 | *HAU2786a | B | A | B | B | B | B | A | B | B | B | A | B | A | A | A | B | A | B | B |
| 232 | *HAU2786b | B | B | A | A | A | B | A | B | B | B | A | B | A | B | B | A | A | B | A |
| 233 | *HAU2857  | A | A | B | B | B | B | B | A | B | A | A | B | A | A | A | A | B | A | B |
| 234 | *HAU3069  | B | A | B | B | A | A | B | A | A | A | A | A | A | A | A | A | B | A | B |
| 235 | *HAU3071  | A | A | B | B | A | B | B | A | A | A | A | A | B | B | B | A | B | A | B |
| 236 | *HAU3177  | - | A | B | B | A | A | B | B | A | B | A | B | A | A | B | A | A | A | A |
| 237 | *JESPR154 | B | B | A | A | B | A | A | B | A | B | A | B | A | A | A | B | A | A | B |

|     |           |   |   |   |   |   |   |   |   |   |   |   |   |   |   |   |   |   |   |   |   |
|-----|-----------|---|---|---|---|---|---|---|---|---|---|---|---|---|---|---|---|---|---|---|---|
| 238 | *JESPR295 | A | B | B | B | A | B | B | B | A | B | A | A | A | B | A | A | B | B | B |   |
| 239 | *JESPR297 | A | B | A | A | A | B | - | - | A | B | B | B | B | B | B | A | A | A | A |   |
| 240 | *JESPR304 | B | A | B | B | A | A | B | A | A | A | B | A | A | A | B | B | A | A | A |   |
| 241 | *MGHES18  | B | A | - | A | B | B | A | A | - | A | A | B | - | A | B | B | B | A | B |   |
| 242 | *MGHES24  | A | A | B | B | B | B | B | B | A | A | B | B | B | B | A | B | B | B | A |   |
| 243 | *MGHES31  | A | A | B | B | B | A | A | A | B | B | A | A | A | A | A | A | A | B | B |   |
| 244 | *MGHES58  | B | A | A | A | B | B | A | A | A | B | A | A | B | A | A | A | A | A | A |   |
| 245 | *MUSS059  | A | B | A | A | B | A | - | A | A | B | B | A | A | B | B | A | B | A | B |   |
| 246 | *MUSS193  | B | B | A | A | A | A | A | A | A | A | B | B | A | A | B | B | B | A | B |   |
| 247 | *MUSS422  | A | B | A | A | A | A | A | A | B | A | B | A | B | A | B | B | A | B | A |   |
| 248 | *NAU1014  | A | A | A | A | A | A | A | A | A | A | B | B | A | B | B | B | B | B | A |   |
| 249 | *NAU1042  | A | B | A | A | B | B | A | A | A | A | A | A | B | A | A | A | B | B | B |   |
| 250 | *NAU1043  | B | A | A | A | B | B | A | A | A | B | A | A | B | A | A | A | A | A | A |   |
| 251 | *NAU1093  | B | A | A | A | B | B | A | A | B | A | A | B | B | A | B | B | B | - | B |   |
| 252 | *NAU1218  | B | A | B | A | B | B | A | A | B | A | A | B | B | A | B | B | B | A | B |   |
| 253 | *NAU1269  | A | B | A | A | B | B | A | A | A | A | A | A | B | A | A | A | B | B | B |   |
| 254 | *NAU1282  | B | A | B | B | B | A | B | B | A | A | B | A | B | A | B | B | B | B | B |   |
| 255 | *NAU1357  | B | B | B | A | A | B | A | B | B | A | B | A | B | B | B | A | B | B | B |   |
| 256 | *NAU2026  | A | B | A | A | B | A | A | A | B | A | A | A | A | - | A | A | B | A | B |   |
| 257 | *NAU2139  | A | A | B | B | B | B | B | B | A | A | A | B | A | B | A | B | A | B | A |   |
| 258 | *NAU2140  | A | B | B | B | B | A | B | A | A | A | A | A | B | A | B | A | B | B | B |   |
| 259 | *NAU2152  | A | B | - | A | B | B | A | A | A | A | B | B | A | B | A | B | A | B | A |   |
| 260 | *NAU2218  | B | A | A | A | A | B | A | A | A | B | A | A | A | A | A | B | B | B | B |   |
| 261 | *NAU2265  | A | B | A | A | B | A | A | A | A | B | B | A | A | B | B | A | B | A | B |   |
| 262 | *NAU2277  | A | B | A | A | B | A | - | A | A | B | B | A | A | B | B | A | B | A | B |   |
| 263 | *NAU2343  | A | A | A | A | A | A | - | A | A | B | B | - | A | A | B | A | A | B | A |   |
| 264 | *NAU2460  | A | B | A | A | B | B | A | A | A | A | B | B | A | B | A | B | A | B | A |   |
| 265 | *NAU2701  | A | B | B | B | B | B | B | B | A | A | B | A | A | A | A | A | B | B | A |   |
| 266 | *NAU2715  | A | B | B | B | B | A | B | B | B | B | B | A | A | B | A | A | A | A | B |   |
| 267 | *NAU2742  | B | A | B | B | B | B | B | B | B | B | A | B | A | - | A | B | A | B | B |   |
| 268 | *NAU2873  | B | A | B | B | B | A | B | A | A | A | B | A | B | - | B | B | B | B | B |   |
| 269 | *NAU2893  | A | A | B | B | A | B | A | A | B | A | A | B | A | A | A | A | A | A | A |   |
| 270 | *NAU2894  | B | A | B | B | A | A | - | A | A | A | A | A | A | A | A | A | A | B | A | B |
| 271 | *NAU2957  | A | B | B | B | B | A | B | A | A | A | A | A | B | A | B | A | B | B | B |   |
| 272 | *NAU2960  | A | A | A | A | A | B | A | A | A | B | B | A | B | A | A | B | B | B | B |   |
| 273 | *NAU2984  | B | A | A | A | B | A | B | B | A | B | B | B | A | A | B | A | B | A | A |   |
| 274 | *NAU3052  | B | B | - | B | B | B | B | B | A | A | B | A | A | A | B | B | B | A | B |   |
| 275 | *NAU3100  | A | B | A | A | B | A | A | B | B | B | B | A | A | A | A | A | B | B | A |   |
| 276 | *NAU3112  | B | B | A | B | B | B | B | B | A | B | A | B | B | A | B | A | A | B | B |   |
| 277 | *NAU3177  | A | B | A | A | A | A | A | B | A | B | B | B | A | B | A | B | A | B | B |   |

|     |           |   |   |   |   |   |   |   |   |   |   |   |   |   |   |   |   |   |   |   |   |
|-----|-----------|---|---|---|---|---|---|---|---|---|---|---|---|---|---|---|---|---|---|---|---|
| 278 | *NAU3181  | B | A | B | A | A | B | B | B | A | B | A | A | B | A | B | A | A | A | A |   |
| 279 | *NAU3217  | B | A | A | A | A | B | A | A | B | B | A | A | A | B | A | A | A | A | B |   |
| 280 | *NAU3254  | A | A | A | A | A | A | A | A | B | B | B | A | A | B | A | A | B | A | A |   |
| 281 | *NAU3308  | B | B | B | B | B | B | B | A | B | A | A | A | A | A | A | A | B | A | B |   |
| 282 | *NAU3384  | A | B | - | B | B | B | B | A | B | A | B | A | B | A | B | B | A | B | A |   |
| 283 | *NAU3385  | A | B | A | A | A | A | - | A | B | A | B | A | B | A | B | B | A | B | A |   |
| 284 | *NAU3390  | A | B | B | B | B | B | A | A | A | A | B | B | A | B | A | B | A | B | A |   |
| 285 | *NAU3404  | B | B | A | A | A | A | A | B | A | A | A | B | A | B | A | B | B | A | A |   |
| 286 | *NAU3437  | B | B | A | A | B | B | - | B | A | A | A | B | B | A | A | A | B | B | A |   |
| 287 | *NAU3468  | A | A | B | B | B | B | B | A | B | A | A | A | A | A | A | A | A | B | A | B |
| 288 | *NAU3519  | B | B | B | B | A | A | B | B | A | A | A | B | B | A | A | A | A | A | A |   |
| 289 | *NAU3695  | A | A | B | A | A | A | A | A | B | A | A | A | B | B | A | A | B | A | A |   |
| 290 | *NAU3736  | A | B | A | A | B | A | A | A | B | A | B | B | B | A | A | B | A | B | A |   |
| 291 | *NAU3765  | B | B | B | A | B | A | - | B | A | - | A | B | A | A | A | B | A | A | B |   |
| 292 | *NAU3820  | A | A | B | A | A | B | A | - | A | A | B | A | A | A | B | B | B | B | B |   |
| 293 | *NAU3839  | B | A | B | B | B | B | A | B | B | B | A | B | A | A | A | B | A | B | B |   |
| 294 | *NAU3868  | B | B | - | B | B | A | B | A | A | B | B | B | A | B | B | A | B | A | A |   |
| 295 | *NAU3901  | - | - | B | B | - | B | - | - | - | - | A | - | - | B | - | A | - | - | A | - |
| 296 | *NAU3934  | A | A | B | B | A | B | B | A | A | B | B | A | A | A | B | A | A | A | B |   |
| 297 | *NAU3966  | A | B | A | B | A | A | B | B | A | A | A | A | B | A | B | B | B | A | B |   |
| 298 | *NAU3995a | A | B | A | A | A | B | A | B | B | B | A | B | A | B | B | A | A | B | A |   |
| 299 | *NAU3995b | A | A | B | B | B | B | B | B | B | B | A | B | A | A | A | B | A | B | B |   |
| 300 | *NAU4034  | B | B | A | A | A | A | A | A | A | A | B | B | B | A | B | A | B | A | A |   |
| 301 | *NAU4045  | A | B | - | A | A | A | A | B | A | B | B | B | A | B | A | B | A | B | B |   |
| 302 | *NAU4064  | B | A | B | B | A | A | B | B | A | B | A | B | A | A | B | A | A | A | A |   |
| 303 | *NAU5072  | A | B | B | B | - | A | B | B | B | B | B | A | A | B | A | A | A | A | B |   |
| 304 | *NAU5120  | B | B | - | B | B | B | B | A | A | A | B | A | B | A | B | A | A | A | A |   |
| 305 | *NAU5260  | A | A | B | B | B | B | B | B | A | - | B | B | B | A | A | B | A | A | A |   |
| 306 | *NAU5330  | B | B | A | B | B | A | A | B | B | B | B | B | B | B | B | B | B | B | B |   |
| 307 | *NAU5428  | A | B | B | A | B | A | A | A | A | A | B | B | A | B | A | B | A | B | A |   |
| 308 | *NAU5434  | B | A | A | A | B | B | A | A | B | A | A | B | B | A | B | B | B | A | B |   |
| 309 | *NAU5474  | B | B | - | B | B | B | B | A | A | B | A | A | A | B | B | B | A | B |   |   |
| 310 | *NAU6240  | A | A | B | B | A | B | B | A | A | A | B | B | A | A | B | A | A | B | A |   |
| 311 | *NAU6309  | A | B | A | A | B | A | A | A | B | A | B | B | B | A | A | B | A | B | A |   |
| 312 | *NAU6367  | A | B | A | A | A | A | A | A | B | A | B | A | B | A | B | B | A | B | A |   |
| 313 | *NAU748   | A | B | B | B | A | B | A | - | B | A | A | B | B | A | A | A | A | B | B |   |
| 314 | *NAU797   | A | B | A | A | B | B | A | A | A | A | A | A | B | A | A | A | B | B | B |   |
| 315 | *NAU828   | A | B | A | A | B | B | A | A | A | A | A | A | B | A | A | A | B | B | B |   |
| 316 | *NAU833a  | A | B | A | A | B | B | A | A | A | A | A | A | B | A | A | A | B | B | B |   |
| 317 | *NAU833b  | A | B | A | A | B | B | A | A | A | A | A | A | B | A | A | A | B | B | B |   |

|     |           |   |   |   |   |   |   |   |   |   |   |   |   |   |   |   |   |   |   |   |
|-----|-----------|---|---|---|---|---|---|---|---|---|---|---|---|---|---|---|---|---|---|---|
| 318 | *NAU845   | A | A | A | A | B | B | - | A | B | A | A | B | A | B | B | B | B | A | B |
| 319 | *NAU862   | B | A | A | B | B | B | B | A | A | A | B | A | A | A | B | A | A | A | A |
| 320 | *NAU874   | B | A | - | B | - | B | B | A | B | A | A | A | B | A | A | A | B | A | B |
| 321 | *NAU895   | A | B | A | A | B | A | A | A | A | B | B | A | A | B | B | A | B | A | B |
| 322 | *NAU896   | B | B | - | B | A | A | B | B | A | B | B | A | A | B | A | A | A | B | B |
| 323 | *NAU935   | A | A | B | B | B | B | - | B | A | A | B | B | B | B | A | B | B | B | A |
| 324 | *NAU943   | A | A | B | B | A | A | B | A | B | B | B | A | A | B | A | A | B | A | B |
| 325 | *NBRI0014 | B | B | B | B | B | B | B | B | A | A | B | B | B | B | A | B | B | B | A |
| 326 | *NBRI0694 | B | B | A | A | A | A | A | A | A | B | B | A | A | B | B | B | B | B | B |
| 327 | *PGML0014 | A | A | - | B | B | A | B | A | B | A | A | A | A | B | A | B | B | A | A |
| 328 | *PGML0120 | A | A | B | B | B | B | B | B | A | A | B | B | A | A | B | A | B | B | B |
| 329 | *PGML0695 | A | - | A | A | B | A | A | A | B | A | A | A | A | B | A | A | B | A | B |
| 330 | *PGML0700 | B | A | B | B | A | A | B | A | A | A | B | A | A | A | B | B | A | A | A |
| 331 | *PGML0989 | B | A | A | B | B | B | B | A | B | A | A | A | A | A | A | A | B | A | B |
| 332 | *PGML1219 | B | B | B | B | A | B | B | B | B | B | A | B | B | B | B | A | A | B | B |
| 333 | *PGML1289 | B | A | B | B | B | B | - | A | B | A | B | B | B | B | A | B | A | A | A |
| 334 | *PGML1309 | A | B | A | A | A | B | B | A | A | B | B | B | B | B | B | A | A | A | A |
| 335 | *PGML1368 | A | B | - | A | A | B | A | B | A | A | A | A | A | B | A | B | A | B | B |
| 336 | *PGML1568 | A | B | B | A | A | B | A | B | A | A | A | A | A | B | A | B | A | B | A |
| 337 | *PGML1637 | A | A | B | B | B | A | B | A | B | B | B | A | A | A | A | A | A | B | - |
| 338 | *PGML1671 | B | A | B | B | B | B | B | B | A | B | B | B | A | B | B | A | B | B | A |
| 339 | *PGML1709 | - | B | A | A | A | A | A | A | B | B | A | A | A | B | B | B | A | A | A |
| 340 | *PGML1712 | A | B | A | B | A | A | - | A | A | A | A | A | A | A | A | A | A | B | A |
| 341 | *PGML1833 | B | A | B | B | A | A | B | A | B | B | B | A | A | B | A | B | A | A | A |
| 342 | *PGML1884 | A | - | - | B | B | B | - | A | A | A | A | A | A | B | A | A | A | A | B |
| 343 | *PGML1916 | B | A | B | A | A | B | B | A | B | A | A | B | A | B | B | A | B | B | A |
| 344 | *PGML1917 | B | A | B | B | B | B | B | B | A | B | B | A | A | B | B | A | B | B | B |
| 345 | *PGML2202 | B | B | A | A | A | A | A | A | A | A | A | A | B | B | A | B | A | A | A |
| 346 | *PGML2321 | B | A | - | B | A | A | B | A | B | B | B | A | A | B | A | B | A | A | A |
| 347 | *PGML2464 | B | A | A | A | A | A | A | A | A | A | A | B | A | A | B | B | B | A | B |
| 348 | *PGML2498 | B | - | - | B | B | B | - | A | B | A | A | A | B | A | A | A | B | A | B |
| 349 | *PGML2562 | A | B | B | B | B | A | B | B | B | B | B | A | A | B | A | A | A | A | B |
| 350 | *PGML2605 | A | B | B | B | A | A | B | B | A | B | B | B | A | A | B | B | A | A | A |
| 351 | *PGML2830 | A | B | A | B | B | B | B | B | A | A | B | A | A | A | B | B | B | A | B |
| 352 | *PGML2858 | B | B | - | B | B | B | B | B | A | B | A | B | B | A | B | A | A | B | B |
| 353 | *PGML3120 | B | A | - | A | A | A | A | A | B | B | B | A | B | A | A | B | B | A | A |
| 354 | *PGML3887 | A | A | B | B | A | B | B | A | B | A | A | - | A | B | A | B | B | A | A |
| 355 | *PGML4185 | A | B | A | A | B | B | A | B | B | B | B | A | A | A | A | A | B | - | A |
| 356 | *PGML4186 | A | B | A | A | B | B | A | B | B | B | B | A | A | A | A | A | B | B | A |
| 357 | *PGML4289 | A | A | A | A | A | B | A | A | A | B | B | B | A | B | B | A | A | A | A |

358 \*PGML4342 B A B B A A B B A A A A A A A A B A A  
359 \*PGML4350 B B A A A A A A A A B B A A B B B B B  
360 \*PGML4457 B B A A A A - A A A B B B A B B B A B  
361 \*PGML4521 A A B B B B - A B A A B A A A A B A B  
362 \*PGML4657 B A A A A A A A B B B A B A A B B A A  
363 \*PGML4763 A A A A B B A A A A B B A B A A A A B  
364 \*SHIN0219 A A B B A B B B A B B B A B B A B A A B  
365 \*SHIN0376 B A A A B B A A A B A A B A A A A A A  
366 \*SHIN0654 A A A A A B A A A A A B A A A A B B A  
367 \*SHIN1339 A A B B B A - B B B B B A B B B A B A  
368 \*SHIN1341 A B B B A A B B B A A B A - A A A A A  
369 \*SHIN1343 - - B B B B B B A A B B B A A B A A A  
370 \*SHIN1462 A A B B B A B A B B A B A B B A B A B  
371 \*SWU0077 A A A A A A - A A B B B A A B A A B A  
372 \*SWU0119 A A A A A A A A A A B B B A A B A A B A  
373 \*SWU0189 - B A A A A A B A B A A A A A B A A A  
374 \*SWU0514 B A A B A A - A B B B A A B A B A A A  
375 \*SWU0598 B A B B B B B A B A B B B B A B A A A  
376 \*SWU0830 B B B B B A B A A B A A B A A B A A B  
377 \*SWU10037 - B A B B B B A A B B B A A B B B B A  
378 \*SWU10038 - B B B B B B B A B B B A A B B B B B  
379 \*SWU10054 B B A A B B A A A B B B A A B A B B A  
380 \*SWU10056 - - A A B B A A A B B B A A B A B B A  
381 \*SWU10060 - A - A B B - A A B B B A A B A B B A  
382 \*SWU10062 - A A A B B A A A B B B A A B A B B A  
383 \*SWU10064 B A A A A B A B B B A A B A B B A A A  
384 \*SWU10067 B A B A A B A B B B B A B A B B A A A  
385 \*SWU10094 B A A A B A B B A B B B A A B A B A A  
386 \*SWU10205 - A A A B B A A B A A B A B B B B A B  
387 \*SWU10214 B A B B A B B A A A A A B A A A A A  
388 \*SWU10266 - A - B A A B A B A A B B A B B B A A  
389 \*SWU10627 B B A A A B A A A B B B B B B A A A A  
390 \*SWU10785 B B A A B A B B B A A B A A B B B B A  
391 \*SWU10800 - A B B A B B B B A A B A B A B B A A  
392 \*SWU10864 - A A A A B - A B A A A A B B A A B A  
393 \*SWU10912 - B A A B A A A A B B B A B A B A B B  
394 \*SWU10930 A B - A A A A A A B B B A B A B A B -  
395 \*SWU10954 - B A A A A A B A B B B A B A B A B B  
396 \*SWU10959 - B - A A A A B A B B B A B A B A B B  
397 \*SWU10986 B B - A A A A - A B B B A A - B A B B

398 \*SWU10987 B B B A A A A B A B B B A A - B A B B  
399 \*SWU10994 A A A A A A A A A A A B A B - B B A A  
400 \*SWU11013 B A - A B B - A B A B B A A - B A B A  
401 \*SWU11038 A B - A A A A A A A A A B A B - A B A B  
402 \*SWU11191 A A A A A B - A A B A A A A B B A B A  
403 \*SWU11204 A A A A A B A A A - A A B A - B A B A  
404 \*SWU11309 A - A A A A - A B A B A B A - B A B A  
405 \*SWU11374 A B A A A A - A B A B A B A - B B B A  
406 \*SWU11384 A A - B A B B A A A A B A A - A A A A  
407 \*SWU11560 A A A B A B B A A A A B A A - A A A A  
408 \*SWU11630 A A A A B A A A B A B B B A - B A B A  
409 \*SWU11632 A A B B B B - A A A A A A A - A A A A  
410 \*SWU11691 A B A A B A A A B A B B B A - A B B A  
411 \*SWU11794 A A B B B B B B B A B A B B - B B B B  
412 \*SWU11855 A B A A B A B A A B B A A B - A B A B  
413 \*SWU11887 B A A B A A B B B A B B A B B A A B A  
414 \*SWU11889 B A - B A A B B B A B B A B B A A B A  
415 \*SWU11950 B A - B A A B A A A B A A A B B A A A  
416 \*SWU11976 B A B B A A B A B A B A A A B B A A A  
417 \*SWU12016 A A B B - - B A B A A A A A B B A A A  
418 \*SWU12025 - A B A B B B B B A B B A A B B A B A  
419 \*SWU12107 - A B B B B B B A A B B B B A B B B A  
420 \*SWU12126 B A B A A B A A B A B B A A B B A B A  
421 \*SWU12147 - A A A A B A A B A B B A A B B A B A  
422 \*SWU12250 A A - A A A A A A A B B A B B B B B A  
423 \*SWU12282 A B - A A A - A A A B B A B B B B B A  
424 \*SWU12343 B B B B B B B B A A B B B B A B B B A  
425 \*SWU12393 B A A A A B A A B A B B B A B B A B A  
426 \*SWU12490 B A A A B B - A B A B B A A B B A B A  
427 \*SWU1259 A A - B B A B A A B B B A - B B B B A  
428 \*SWU12672 A B B B B B A B A A A A A A B B B A  
429 \*SWU12732 - A - A A A A B B B B A A B A B A A  
430 \*SWU12765 B B B B B B - A B A A B A A A B A B A  
431 \*SWU12783 B B B A B B A B B B B B B B B B A B B  
432 \*SWU12818 B B A A A B A B B B A A A B B A A B A  
433 \*SWU12819 - A B B B B B A B B A B A A A B A B B  
434 \*SWU12838a B - A A A B - B B B A B A B B A A B A  
435 \*SWU12838b B B B B B B - B B B A B A A A B A B B  
436 \*SWU12840 B A B B B B A B B B A B A A A B A B B  
437 \*SWU12841 B A B B B B B B B B A B A A A B A B B

438 \*SWU12872 - A B B B B - B A A B B B A A B - A A  
439 \*SWU12876 A A B B B B B B A A B B B A A B A A A  
440 \*SWU12976 A A B A A A B B A A B B B A B A B B A  
441 \*SWU13032 - A B B B B B A B A B A A B A A B A A  
442 \*SWU13083 A B B B A A B B B B A B B A A A A A A  
443 \*SWU13133 B A - A A A A A B B B B B A A B B A A  
444 \*SWU13150 B A - A A A A A B B B B B A A B B A A  
445 \*SWU13256 A A A A A A A A B B B A B A A B B A A  
446 \*SWU13267 B A - A A A A A B B B A B A A B B A A  
447 \*SWU13268 - A A A A A A A B B B A B A A B B A A  
448 \*SWU13378 B B A A B A B A A A A B A A B B A B B  
449 \*SWU13514 A B A A A B A A A B B B B B B A A A A  
450 \*SWU13736 A A - A B A A A B B B A A A B B A A B  
451 \*SWU13745 - - - A B A - A B B B A A A B B A A B  
452 \*SWU13758 A A - A B A - A B B B A A A B B A A B  
453 \*SWU13824 B B B B B B B A B A A A A A A B A B  
454 \*SWU13829 B B A B - - B B B B - B A A B A A A B  
455 \*SWU13909 A A A A B A A A A A B B A B A B A A B  
456 \*SWU14060 B B B B B A B B B A B B A B A B B B B  
457 \*SWU14077 A B A B A B A B A B B A A B - A A A -  
458 \*SWU14224 - - - B B B - A B A A A A A A B A B  
459 \*SWU14431a A B A A B A A B A B A B A A A B - A B  
460 \*SWU14431b - A A B A A B A B A A A B B A A - A B  
461 \*SWU14535 - - - B B B - A A A A A A B A A A A B  
462 \*SWU14539 A B B B B B B - A A A A A B A A A A B  
463 \*SWU14542 - - - B B B - A A A A A A B A A A A B  
464 \*SWU14543 A B B B B B B A A A A A A - A A A A B  
465 \*SWU14545 A - - B B B B A A A A A A B A A A A B  
466 \*SWU14627 A A B B B - A B A A B B B B A B B B A  
467 \*SWU14628 B B A A A A A A B B A A A A B A A A B  
468 \*SWU14761 B A B B B B B B A B A B A A B B B A A  
469 \*SWU14770 A B A A A A A A A B B A A A A A A B A  
470 \*SWU14807 A B - A - A A B B A B A A A A A B B A  
471 \*SWU14934 - A A A B A A A B B B A A A A B B B A  
472 \*SWU15157 B B - A B A - A B B A A A A B A A A  
473 \*SWU15194 B A - B A B B B A B B A A A B A - B B  
474 \*SWU15407 A B - B B B B B A A B A A A B B B A B  
475 \*SWU15413 A B - B B B B B A A B A A A B B B A B  
476 \*SWU15511 B B B B B A B - A A B A A A B B B B B  
477 \*SWU15517 B B B B B A B A A A B A A A B B B B B

478 \*SWU15733 - A B B B A B A A B A A B A B B B B B B  
479 \*SWU15915 - B B A A A A B A B A B A A A B A A A  
480 \*SWU15972 - A A A A - - B A A - A A B A B B A A  
481 \*SWU16138 - B A A B A A A B B A B B B A A A A A  
482 \*SWU16269 A A A A A A A A A A B B A B B B B B A  
483 \*SWU16281 A A - A A A - A A A B B A B B B B B A  
484 \*SWU16487 A B B B A A B B B B B A A A B B A A  
485 \*SWU16488 A B B B A A A B B B B B A A A B B A A  
486 \*SWU16489 A B B B A A - B B B B B A A A B B A A  
487 \*SWU16569 A B A A B B A B B A B B B A A B B - B  
488 \*SWU16573 A - A A B B A B B A B B B A A B B - B  
489 \*SWU16576 A B A A B B A B B A B B B A - B B A B  
490 \*SWU16645 A A A A A B A B B B B B A A A B B A A  
491 \*SWU16649 A B A A A B A B B B B B A A A B B A A  
492 \*SWU16651 A B A A A B A B B B B B A A A B B A A  
493 \*SWU16676 A A B A A A A B B B A B B B B A B - B  
494 \*SWU16753 B A B B A A B A B A B A A B A A A A B  
495 \*SWU16755 B A B B A A - A B A B A A B A A A A B  
496 \*SWU16777 B A A B A A A A B A B A A B A A A A B  
497 \*SWU16778 B A B B A A - A B A B A A B A A A A B  
498 \*SWU16780 B A - B A A - A B A B A A B A A A A B  
499 \*SWU16781 A B B B A B B - A B A A A B A A B B B  
500 \*SWU16782 A B B B A B B B A B A A A B A A B B B  
501 \*SWU16783 A B A B A B A A A B A A A B A A B B B  
502 \*SWU17233 A A A A B A A B B B B A A A A A A B  
503 \*SWU17241 A A A A B A A B B B B A A B A A A A B  
504 \*SWU17251 A A A A B A A B B B B A A B A A A A B  
505 \*SWU17257 A A A A B A A B B B B A A B A A A A B  
506 \*SWU17336 A B B B B A B B B B B A A B A A A A B  
507 \*SWU17395 A B B B B A - A B B B A A B A A A A B  
508 \*SWU17419 A B B A B A A A B B B A A A A A A B  
509 \*SWU17432 A B B A B A A A B B B A A A A A A B  
510 \*SWU17467 A A B B B A - A B B B A A A A A A B B  
511 \*SWU17713 B B A A A A - A A A B B B A B A B A A  
512 \*SWU17715 B B A A A A A A A A B B A A B A B A A  
513 \*SWU17717 B B A A A A A A A A B B B A B A B A A  
514 \*SWU17781 B A A A A A A A A A B B A A B B B B B  
515 \*SWU17782 B A B B A A A B A A A A A A A B A A  
516 \*SWU17787 B B A A A A A A A A B B A A B B B B B  
517 \*SWU17846 B B B A B A B A A A A B A A A B A B B



518 \*SWU17882 B A B B A A B A B A A A B B A A A A B  
519 \*SWU17897 B A A A A A A A B A A A B B A A A A B  
520 \*SWU17990 B A A A A B A A B B A A A B A A A A B  
521 \*SWU17991 B A A A A B A A B B A A A B A A A A B  
522 \*SWU18015 B A A A A B A A B B A A A B A A A A B  
523 \*SWU18223 A A - B B A B B A A - A B A B B A A A  
524 \*SWU18488 B A B B A A A A B B B B A B A B A A A  
525 \*SWU18672 B A A B A B B A B B B B B B A B A A A  
526 \*SWU18681 B A B B A B B A B B B B A B A B A A A  
527 \*SWU18697 B A B B B B A A B A B B B B A B A A A  
528 \*SWU18698 B A B B B B A A B A B B B B A B A A A  
529 \*SWU18876 A B B B B B - B A A B A A A A A B B A  
530 \*SWU18881 A B B B B B B B A A B A A A A A B B A  
531 \*SWU18919 B A B B B A B A B A B B B B A B A A A  
532 \*SWU18959 A B A A B A A B B A B A B A A B A A B  
533 \*SWU19129 B B - B B B B B A B A B B A B A A B B  
534 \*SWU19144 B B A B B B B B A B A B B A B A A B B  
535 \*SWU19184 B B - A A B - A A A A B A A B B B A B  
536 \*SWU19249 B A A A A A - A A A A B A A B B B A B  
537 \*SWU19411 B B B B A B B - A B A B B A B A A B B  
538 \*SWU19412 B B B B A B B B A B A B B A B A A B B  
539 \*SWU19413 B B B B A B B B A B A B B A B A A B B  
540 \*SWU19416 B B B B A B B B A B A B B A B A A B B  
541 \*SWU19430 B B B B A B B B A B A B B A B A A B B  
542 \*SWU19431 B B - B A B B B A B A B B A B A A B B  
543 \*SWU19434 B B B B A B B B A B A B B A B A A B B  
544 \*SWU19541 A A A A B B A A B A A B B A B B B A B  
545 \*SWU19606 B A B A B B B A B A A B B A B B B A B  
546 \*SWU19654 - - - A B B - A B A A B B A B B B A B  
547 \*SWU19656 A A A A B B A A B A A B B A B B B A B  
548 \*SWU19763 B B A B A A B B A B B B A B - B A A B  
549 \*SWU19815 B B A B A B B B A A B B A B A B B B A  
550 \*SWU19848 B B B B A B B A A A B A A B B B B A A  
551 \*SWU19888 B A A A - B A A B A B B - A A A B A B  
552 \*SWU20033 A A B B B A B A A B B B A A A B B B A  
553 \*SWU20035 A A B B B A B A A B B B A A A B B B A  
554 \*SWU20064 A A B B B A B - A B B B A A B B B B A  
555 \*SWU20246 B A - A B B - B B A A B B A B B B A B  
556 \*SWU20260 A B A B A B B B B A A A A A A A B A A  
557 \*SWU20341 A B A A A B - A A B B B B B B A A A A

558 \*SWU20501a A A - A B - A B B B A B B A A B B A B  
559 \*SWU20501b B B A A A A A B A A A B A B A B B A A  
560 \*SWU20511 B B A A A A A B A A A B A B A B B A A  
561 \*SWU20636 B B A B A A A B A A A B B B A B A B B  
562 \*SWU20649 B B - B A B - B A A A B A B A B A B B  
563 \*SWU20675 B B A B A B A B A B A B A B A B A B A  
564 \*SWU20689 B A - B - B B - A A A B A B A B A B A  
565 \*SWU20700 B B B B A B B B A B A B A B A B A A A  
566 \*SWU20813 A A A B B A B A B B A A A B B A B A B  
567 \*SWU20913 A A B B B B B B A B B A B B A B B B  
568 \*SWU20914 A A B B B B B B A A B B A A B A B B B  
569 \*SWU20917 A A B B B B B B A A B B A A B A B B B  
570 \*SWU21415 A B - B A A - B A A B A A B A A A B B  
571 \*SWU21485 A B B B A B B B A A B A B B A A A B B  
572 \*SWU21533 B B - B - A B A A B A A A A A A A B B  
573 \*SWU21538 B B A B A A B A A B A A A A A A A B B  
574 \*SWU21585 A B A B A A B - A A A A B A B - A B A  
575 \*SWU21586 A B A B A A B A A A A A B A - A A B A  
576 \*SWU21617 B B B B B A B A A B B B A B B A B A A  
577 \*SWU21635 A B B B A A B A A A B A B A B A B B A  
578 \*SWU21646 A B - B A A B A A A B A B A B A B B A  
579 \*SWU21718 A A A - A A A A A B B B - A B A A B B  
580 \*SWU21800 B A B B B B B A A B A B A B B A A A B  
581 \*SWU22187 A B A A A B A A B B A B B A A A A B A  
582 \*SWU22192 A B A A A B A A B B A B B A A A A B A  
583 \*SWU22281 A B A A A B - A B B A B B A B A A B A  
584 \*SWU22287 A B A A A B A A B B A B B A B A A B A  
585 \*SWU22290 A B A A A - A A B B A B B A B A A B A  
586 \*SWU22309 A A - - B - - - B A A A A B A A B A A  
587 \*SWU22324 A A B - B B B A B A B A A B A A B A A  
588 \*SWU22338 A A B B B B - A B A A B A A A A B A -  
589 \*SWU22339 A A B B B B B A B A A B A A A A B A B  
590 \*SWU22374 - A B B - - B A B A A B A B - A B B B  
591 \*SWU22413 A A B B B A A A B B B B B B B A A - -  
592 \*TMB0071 A A A A B A A A A A B B A B A B A A B  
593 \*TMB0107 B A A A A A A A A A B A A A B A A A B  
594 \*TMB0628 A A - A A A A A A A B B A B B B B B A  
595 \*TMB1268 B A A B A A B A A A B A A A B B A A A  
596 \*TMB1296 B B - A A A - A A A B B B A B A B A A  
597 \*TMB1638 A A A A A A A A A A B B B A A B A A B B

598 \*TMB2386 - B B B B B B B B B B B A B A A A B B A  
599 \*TMB2940 - - - A B B - A B A A B B A B B B A B  
600 \*ICR00010 A B A - B - B A - B B B A A B B B B A  
601 \*ICR00016 B B A A B B B B B B B B B A B B B B A  
602 \*ICR00093 B B A - A A A B A A A B A A A A B A B  
603 \*ICR00121 A A B B B A A A A A B A B A A A B B  
604 \*ICR00142 B B B B B B B B B B B B B B B B B B A  
605 \*ICR00143 A B A - B B A A B A A B B A A B B B A  
606 \*ICR00307 A A A A - B B A A B B A - A B A B A A  
607 \*ICR00417 A B B - B B B A A A A A A B A A A A B  
608 \*ICR00500 B B B A B B - A A A A A B A B B A B A  
609 \*ICR00647 - B A A A B - A A - B B B B - A A A A  
610 \*ICR01320 A A A B A B B A A A A B A A B A A A B  
611 \*ICR01566 A B A A A B A A A A A B - B A A A A  
612 \*ICR01638 B A B B B B B B A B B B A B B A B B A  
613 \*ICR01729 A B B B A B B B A A B A B B B A A B B  
614 \*ICR01787 B A B A A - A B B B A A B B A A B A B  
615 \*ICR01810 - A B A A A A A B B A A B B A A B A B  
616 \*ICR01834 - A B A A A A A A A B A A A A A A A A  
617 \*ICR01949 B A B B B B - A A B B B A A A A B B A  
618 \*ICR02258 B A A B A B B B B B A A A A A A A A A  
619 \*ICR02589 B B B B A A A B A A B A A A A A B B B  
620 \*ICR02737 B A - A B B A A B A A B B A B B B A B  
621 \*ICR02849 A A B B A B A A B A A B A B A B B A A  
622 \*ICR02862 A A A A A A A B A A A A B A A B A B A  
623 \*ICR03107 - - - - - - - - - - - - - - - -  
624 \*ICR03206 A A B B B B A B B A B A A A A B B B A  
625 \*ICR03295 A B A A A A A A A B B B A B | A B A B B  
626 \*ICR03391 B B B B B B B B B B B B A B B B B B A  
627 \*ICR03724 A B A A A A A B A B B B A A A B A B B  
628 \*ICR03725 A B A A A A A B A B B B A A A B A B B  
629 \*ICR03943 B B A B B B B B B B B A B B B B A A  
630 \*ICR04408 A A - A B B A A A B - B A - - - A B -  
631 \*ICR04705 A A A A A B A A B A A A B A A B A B A  
632 \*ICR05924 A A A A B B A A B A A B B A B B B A B  
633 \*ICR07050 A B A B A B - - - A A A A A - A B A A  
634 \*ICR07393 B A A A B B A - A B A A B - B A A - A  
635 \*ICR08245 - A B B A A B A B - A B B B B B A A  
636 \*ICR08249 B A B B B A B A A B A A B A B B B B B  
637 \*ICR10177 B A A A B B A A B - A B B A B B B A B

|     |           |   |   |   |   |   |   |   |   |   |   |   |   |   |   |   |   |   |   |   |
|-----|-----------|---|---|---|---|---|---|---|---|---|---|---|---|---|---|---|---|---|---|---|
| 638 | *ICR10227 | B | A | A | A | A | A | A | A | B | B | B | B | A | A | A | B | B | B | B |
| 639 | *ICR10344 | A | A | A | A | A | A | A | A | A | B | B | A | B | B | B | A | A | A |   |
| 640 | *ICR10602 | A | B | A | - | B | B | A | A | B | A | A | B | B | A | B | B | B | A | B |
| 641 | *ICR10808 | B | A | B | A | B | B | B | A | B | A | - | B | B | A | B | B | B | A | B |
| 642 | *ICR10853 | - | - | - | A | B | B | A | A | - | A | - | - | - | A | B | B | B | A | - |
| 643 | *ICR10890 | B | A | - | A | B | B | A | A | B | A | A | B | B | A | B | B | B | A | B |
| 644 | *ICR11064 | A | A | B | B | B | - | A | B | A | A | B | B | B | B | A | B | B | B | A |
| 645 | *ICR11205 | A | A | B | B | B | B | A | A | A | - | - | A | - | - | A | B | B | B | A |
| 646 | *ICR11559 | A | A | B | B | A | B | B | A | A | A | - | - | B | A | - | A | A | A | A |
| 647 | *ICR11883 | A | A | B | B | A | B | B | A | A | A | A | B | A | A | B | - | A | A | A |
| 648 | *ICR11884 | B | A | A | A | A | A | A | B | A | B | B | A | B | B | B | B | A | B | B |
| 649 | *ICR11885 | B | A | A | B | A | B | B | A | A | A | A | B | A | A | B | A | A | A | A |
| 650 | *ICR11957 | A | A | - | B | A | B | B | A | A | A | A | B | A | A | B | A | A | A | A |
| 651 | *ICR12037 | A | B | B | - | - | B | B | - | A | A | A | A | A | B | A | A | A | A | B |
| 652 | *ICR12130 | A | A | A | A | A | B | A | B | A | B | B | A | B | A | A | B | B | B | A |
| 653 | *ICR12228 | A | A | A | A | A | B | A | B | A | B | B | B | B | B | A | - | B | B | B |

Note:'-' referred to the missing data.

| 20 | 21 | 22 | 23 | 24 | 25 | 26 | 27 | 28 | 29 | 30 | 31 | 32 | 33 | 34 | 35 | 36 | 37 | 38 | 39 | 40 | 41 | 42 | 43 |   |
|----|----|----|----|----|----|----|----|----|----|----|----|----|----|----|----|----|----|----|----|----|----|----|----|---|
| A  | B  | A  | B  | A  | B  | B  | A  | B  | A  | B  | A  | B  | A  | B  | A  | A  | A  | A  | B  | B  | A  | A  | B  |   |
| A  | B  | B  | A  | B  | A  | B  | A  | B  | B  | A  | A  | A  | B  | B  | A  | A  | B  | B  | A  | B  | A  | B  | B  |   |
| A  | A  | A  | A  | B  | A  | B  | A  | A  | B  | A  | B  | A  | -  | A  | B  | B  | A  | A  | B  | A  | -  | B  | B  |   |
| A  | A  | A  | A  | A  | A  | B  | B  | B  | A  | B  | B  | A  | A  | B  | A  | A  | B  | B  | B  | B  | B  | A  | A  | B |
| A  | A  | A  | A  | A  | A  | B  | A  | A  | B  | A  | B  | A  | A  | A  | B  | B  | A  | B  | B  | B  | A  | A  | B  |   |
| A  | B  | B  | -  | B  | A  | A  | B  | A  | A  | B  | A  | A  | A  | B  | A  | A  | B  | -  | B  | A  | A  | A  | A  |   |
| A  | A  | B  | B  | A  | A  | B  | B  | B  | B  | B  | A  | B  | B  | -  | A  | B  | A  | B  | B  | A  | A  | A  | B  |   |
| A  | A  | B  | A  | B  | A  | A  | A  | B  | A  | B  | A  | A  | A  | A  | A  | A  | B  | -  | B  | B  | A  | A  | B  |   |
| A  | B  | A  | A  | A  | A  | B  | A  | A  | B  | A  | B  | A  | B  | A  | B  | B  | A  | B  | B  | A  | A  | A  | B  |   |
| A  | A  | A  | A  | B  | B  | A  | A  | A  | A  | A  | A  | A  | A  | A  | B  | B  | B  | A  | B  | B  | A  | A  | A  |   |
| B  | A  | B  | B  | B  | A  | A  | A  | A  | A  | B  | B  | B  | B  | B  | A  | B  | B  | B  | A  | B  | A  | A  | A  |   |
| B  | A  | A  | A  | A  | A  | A  | A  | B  | A  | A  | B  | A  | A  | B  | A  | B  | B  | A  | A  | B  | A  | A  | A  |   |
| A  | B  | A  | A  | B  | B  | B  | A  | B  | B  | -  | A  | A  | A  | A  | A  | A  | B  | B  | A  | B  | A  | A  | A  |   |
| A  | B  | A  | A  | A  | A  | A  | B  | B  | B  | A  | A  | A  | A  | A  | B  | B  | B  | A  | B  | B  | B  | A  | A  |   |
| A  | B  | A  | A  | A  | A  | A  | B  | B  | B  | A  | A  | A  | A  | A  | B  | B  | B  | A  | B  | B  | B  | A  | A  |   |
| B  | B  | B  | A  | A  | A  | A  | A  | B  | A  | A  | A  | A  | B  | B  | B  | B  | B  | A  | A  | B  | A  | A  | B  |   |
| B  | B  | A  | B  | B  | A  | A  | B  | A  | B  | A  | B  | B  | B  | B  | B  | A  | B  | B  | B  | B  | A  | A  | B  |   |
| B  | B  | B  | A  | A  | A  | B  | B  | B  | A  | B  | B  | A  | A  | A  | B  | A  | B  | A  | A  | B  | A  | A  | A  |   |
| A  | A  | B  | B  | A  | A  | B  | A  | A  | A  | A  | A  | B  | A  | -  | B  | B  | A  | A  | A  | A  | A  | B  | B  | B |
| B  | A  | A  | A  | B  | B  | A  | A  | B  | A  | B  | A  | A  | B  | B  | -  | A  | B  | B  | A  | B  | A  | A  | A  |   |
| A  | A  | A  | A  | A  | A  | A  | A  | B  | B  | B  | B  | A  | A  | B  | B  | A  | B  | B  | B  | B  | A  | A  | B  |   |
| A  | B  | B  | B  | A  | A  | B  | A  | A  | B  | B  | B  | B  | A  | B  | A  | B  | B  | A  | A  | B  | B  | B  | A  |   |
| A  | A  | B  | A  | A  | A  | B  | A  | -  | B  | A  | A  | A  | B  | -  | A  | A  | B  | A  | A  | A  | A  | A  | A  |   |
| A  | A  | A  | A  | B  | A  | B  | B  | A  | B  | A  | B  | A  | A  | B  | A  | B  | A  | A  | B  | B  | A  | A  | B  |   |
| B  | A  | B  | A  | A  | A  | B  | A  | B  | A  | B  | A  | A  | A  | B  | B  | -  | B  | B  | A  | A  | A  | A  | A  |   |
| A  | A  | A  | A  | -  | A  | B  | A  | A  | B  | B  | A  | A  | A  | -  | B  | A  | A  | A  | B  | A  | A  | B  | B  |   |
| B  | A  | A  | B  | A  | A  | A  | A  | B  | A  | A  | B  | B  | A  | B  | A  | A  | A  | A  | A  | -  | A  | A  | A  |   |
| B  | -  | A  | B  | B  | -  | B  | B  | A  | B  | A  | B  | B  | A  | -  | B  | B  | A  | A  | A  | B  | -  | A  | A  |   |
| B  | B  | A  | B  | B  | A  | B  | B  | A  | B  | A  | B  | B  | B  | A  | B  | B  | B  | A  | B  | B  | A  | A  | B  |   |
| B  | A  | B  | B  | B  | A  | A  | A  | A  | A  | B  | B  | B  | B  | B  | A  | B  | B  | B  | A  | B  | A  | A  | A  |   |
| A  | A  | A  | B  | B  | A  | A  | B  | B  | B  | A  | A  | B  | B  | B  | A  | B  | B  | A  | A  | A  | A  | A  | A  |   |
| A  | A  | B  | A  | A  | B  | B  | B  | B  | A  | B  | A  | A  | B  | -  | B  | A  | A  | B  | A  | B  | A  | A  | B  |   |
| B  | A  | B  | A  | A  | A  | B  | A  | B  | A  | B  | A  | A  | A  | -  | B  | A  | B  | B  | A  | A  | A  | A  | A  |   |
| A  | A  | B  | B  | B  | A  | A  | B  | A  | A  | A  | A  | B  | B  | B  | B  | A  | B  | A  | B  | B  | A  | B  | A  |   |
| B  | B  | A  | A  | B  | A  | B  | A  | A  | A  | B  | B  | A  | A  | A  | -  | A  | B  | A  | A  | B  | A  | B  | B  |   |
| A  | A  | B  | A  | A  | A  | B  | A  | A  | B  | A  | A  | A  | B  | A  | A  | A  | B  | A  | A  | A  | A  | A  | A  |   |

B B B A B A A B B A B A A A B A A B A B B - A A  
B A A B B A B A A B B A B A B - B A B A B B B A  
A B A A A A B A A B A B A B A B B A B B B A A B  
A B A A A A A - B B A A A B A B A B A A B A A B  
B A A B A B A A A B A B A B A A A A A A B B B A A B  
A A A B A A B A B B B B B B B B A A A A B B A A A B  
A B A A B B A B A A A A A A B B A B B B B B B A  
A A B B A B B B B B A B B B A B B B A A A B B A  
B B A A A B B A B B A B B B A A B B A B B A A A A  
B B A A A B A B B A B B B B B B A A A A B B A A A B  
A A A B A B B A A B A B A A A A B A A A B B B A A B  
A A B B A B B A B B B B A B B B A A B B A A B B A  
B B A A A B B B A B B B A B A B A A A A B B B B B A  
A A A A A A A A B B B B A A B B A B B A A A A A B  
B B B A A A A A B A B A B A A A A - A B B A A B A A B  
A A A A A A B B B A B B A A B A A B B B B A A B  
A A A B B A A B A A B B B A A B A B A A B B B A  
B B B A A A B B B B A B A B A A A A B B B B B A  
A A A A A A A A B B B B A A B B A B B A B A A A  
B A B B A A B A A A B A B B B B A B A A A A A B  
A A A A B B A A A A A A B A A B A B B A B B A B B

A B A B A B B B A A B B B B B B A A B A B B B B  
A B A B B A B B A A A - B B B A A B B A A B B A  
A A B B A B B B A A A B B B B A A B B A A B B A  
A B A B A B B B B B B B B B A B B A A A B A B  
A A B B B A A A A A A B B A B B B B B A B A B B A  
B A A B B A A A B B A A B B A A B A B B A A A - A A  
B A A B A B B B A B B B B B B B A A A B A B B B  
B B B A A B B A A A A B A A A B B A A A B B B B  
A B A A A A B A A B A B A B A B B A B B A A A B  
B A A A A A A B B B B B B B A A B B A B A A A A  
A A A B A A B A B B B B B B A A A A B B A A A B  
A B B B B B B A B B B B B B A B B A A B B A B A  
B B A B B A B A A B A B A A B B A A A B B A A  
A A B A B A A A B A - - A A A A B B B B B A A B  
A A B B A B B B A A A B B B B A A B B A A B B A  
B A A A B A A A B A B A A A B A A B B A B A A A  
A A A A A A B B B A B B A B A A A B B B A B B B  
B B A A A B B - B B B B A B B A A A B B A A A B  
B B A A A B B A B B B B A B B A A A B B A A A B  
B A B B A B A A A B B A B B A B B A A A A A A A  
B A A A A B A A A B B B A B B A B B A B B A B B B  
A A B B A B B B B B A B - B A A A A B A A B B A  
A B A B B B B A B B A B B A B B B B A A B B B B  
B B A B B A B B A B A B A B B A B B B A A A B B B  
A A A A A B A B B B B A B B B A A B B B A A A  
B A B B B A A A A A B B B B B A B B B A B A A A  
A A B B A B B B B B A B B B B A A A B A A B B A  
B B A B B A B B A B A B A B B A B B A A A B B A A  
A A B B B A A A B A A A B A B A B B A B A A A A  
A B A B A A B B A B B B B B B B B B B B B B A B

B B A A A B B B B B B B A A B A A A B B A A A B  
B B A A A B B B B B B B A A B A A A B B A A A B  
A A A B B A A A B B A A B B B A B B A A A A A A  
B B B A A B B B B A A A A A A A B A A B B B B B  
A A A A A A A A B B B B A A B B B B B A B A A A  
A A B B A B A B A A A A A A B B A B B B B B B A  
A B A B A B B A B A B A B A B A A A A B B A A B  
B B B A - A A A B A A A A B B B B B A A B A A B  
A A A B - A A A B B A A B B A A B A A A A A A A  
A A B A A B B B B A B A - B B B A B B A B A A B  
A B A B B A B B A A A A B B B A A B B A A B B A  
B A B B B A A A A A A A B B B - B A B B B A B A A  
A A A B B B A A A A A A B B A B B A B A B B A B B  
B B B A A A B B B A B B A A A B A B A A B A A A  
A A A A A A A A B B B B A A B B A B B A B A A A  
A B B A A A A - A A B A B B B B B A - A A A A  
B A A A A B A A - B B B A B B A A B B A B B B A  
A - A A A A B A A B A A A B A B B A B B A A A B  
- B B A B B B A B A B A A A A A A A A A A A -  
A A B B A A B A A B B A A B A A B B B A B B B A  
A B A A B B A B A A A A A A A B B B B A B B A A A  
A B A A A A B A A B A B A B A B A B B A B B A A B  
A B A B B A A A A A A B A A B A A B B B A A A A B  
A B B B A B B B B A B B B B A B B B A B B A A A  
A B A A A A B A A B A B A B A B A B B A B B A A B  
B A A A A A B A B B B B A A B B A A A A A A A A  
B B B A A A B B B B A B A B B B A A B B B B B A  
B A A A A B A A A B B B A B A A B B B A B B B A  
A A B B A B B B B B A B B B B A A A B A A B B A  
A B B A A A B A B A B A A A A B A A A A B A A A  
B B A B B B A A A B A B B A B B A B A B B A A B  
A A B B A B B B B B A B B B B A A A B A A B B A  
B A A A A A B A B B B B A A B B A B A A A A A A  
A B A B A A B B A B B B B A B B A B B A B B A B



B A B B A B A A A B B A B B A B B A A A B A A A  
A A A B B A B A B A A B - A A B B B B B B A A B  
A B A B B B B A B A B A B A A A A B B B A B  
A A B B B A A A B B B B B B B B B A A A A B B B  
A B B B A B B A B A B A B A B A A A A B B B A B  
B B B A A A B B B B A B A B A B A A B B B B B A  
A A A A A A B B A B B A A B B A A A B B A A A B  
A A A A A A B A A B A B A A A B B A B B B A A B  
B B B A B A A B B A A A B A B B B A B B A A B A B A  
B A A B A B B A A B B A A A B A B B A A B A B A  
A A B A B B A A B B A A A A B A A B A A A A B B  
A A B B B A A A B B B B B B B B B B A A A A B B B  
A B B B A A A B A A B A A A A B B A A A A A A B  
A B - A A B B A B B B A A B B A A B A B A B B B  
A A A A A A B B A B B A A B B A A A - B A A A B  
B A A B B A B A - A B A B A - B B B A B B B A A  
B B B A A A B B B B A B A B - B A A B B B B B A  
B B A A B B B B - B A A A A A A A B A A A A A B  
A B A A B A A B A A A A A A B B A A B B B A B - A  
A - A A B B A A A A A A B A A B B A B A B B A B B  
A A B B A A B B B B B A B B - A B A B B A A A B  
A A A A A A B B A B B A A B B A A A B B A A A B  
A A B B B A A A B B B B B B B B B B A A A A B - B  
A B A B A B A B A B A B B B A B B A B A A A B A B  
B A B B B A B A A B A A B A A B B A B B B A A B B A  
B B A B B A B B A B A B A B B A A B B A A A B B A A  
A B A B A B A B A B A B B B A B B A B A A A B A B  
A A B B B A A A B A A B B A B A B B A B A A A A  
B A B A A B A A A B B B A B B A B B B A - B A A  
A B A B B A B B A A B A B B A A A B B A A B B A  
A A B B B A A A A A B B B B B B A B A B B A A A  
A A B A B A A A B A B A A A A A A B B B B A A B

B B B A A A A A B A A A A B B B B B A B B A B B  
A A A A A A A A B B B B B A A B B B B B A B A A A  
A B B A A A B B B B B B A B A B A A A B B B B B  
B A A B B A B A B A B A B A B A B B B A - B B A A  
A A B B B A A A B A A B B A B A B B A B A A B A  
A A A A A A A A B B B B B A A B B A B B A B A A A  
B A B A A B B B B B B B B A B B B B B B A A B A B  
B B B B A B B A B B B B B B B A B B A A B A B A  
A B A A B A B A A A B A B A A A A B B A A A B A B A  
B A B A B B A A B A A B A B A A B B A B A A A B A B  
- - - - - - - - - - - - - - - - - - - - - - - -  
B A A A A A A A B B B B A A B B A B A A A A A A A  
A B B A B A B B B B B A - A B A A B A A A A A B A  
A A B A B B B A B A A A A A B B A A A B A B A A A  
B A B B A A B A A A B A A A A A A A A A A A A A B  
A B B B A B B A B A A B A B B B B A B B B A B B A  
B A A A A A B A B B B B A A B B A A A A A A A A A  
A A B B A - B B B B A A B B B B B A A A A B B B B  
A A B B A - B B B B A A B B B B A A B B B B A A A  
A A A A A A B B A B B A A B B A A A B B A A A A B  
A A A A A A B A A B A B A A B B A A A A A A A A A  
B A A B A A A A B A A A A B A A - A B B A A - B B A  
B A B B A A B A A A B A B B B B A B A A - A A B  
A A A A A A B A A B A A A B A B B B A A B A A A  
A B A B A A B B B A B B B B A B A B B A B A A B  
A B A A A A B B B A A A A A B B B A B B B A B A  
A B B B A B B B B B B B B B B B B B B A A B A B  
B B B B B A A A B A A A B B B A B B B A B A B B

A B A A B A A A B B B A A A A B A A A A B B A  
A B A B B B B A B A B A B A B A A A A B B B A B  
A B A B B B B B A B A B B B B B A A A A A A A B  
A A - A A A A A B B B B A A - B B B B B B A A A  
B A B B A B A A A A B B A B B A B B A A A A A A  
B A A B B A A A A B A A B A B B A B A A A A A A  
B A A B B B B B A A B B B A A B B B B A B B A A  
A B B B B B A B B B A A B A B B A A A B B A B A  
A B A A B A A B A - A A A B B A A B B B A B B A  
A B B B A B B A B B B A B A A A A B A A A A A A  
B A A B B A B A B A B A B A B A A B B B A B B A A  
A A B - B A A A B A A B B A B A B A B B A B A A B  
B A A B B B B B A A B B B B B B B A B B B A B A A  
A A A A A A A A A A B A A A A A B A A A A A A A  
A A A A A A A A A - B B B A A B B B B B B B A A A  
A A B B B A A A B A A B B A A B A B B A B A A - A  
B A B B A B A A B B A A B B A A A A A B B B A A B  
B B B A B A A B A A A A A A A A A A A B B B A A A  
B A B A A B B B B A A B B A A A A A A A A A A A A  
A A A A A A A A A A B A A B B A A A A A A A A A A  
A B B A B B B A B B B A A B A A A A B B A B A A A  
A B B B B B A B B B A A B A B B A A A A B B A B A  
A B A B B B B B A B B A B B A A A A A A A B A B B  
A B B A A B A B B A A A A A A B A B B A B B A A A  
A A B A A - A A B B B A A A A B A A A B B A A A B  
B A B B B A A A A A B A A A A A A A A A A - A A B  
B A B B B B A A A A B A B A B A A B A A A A B B A  
B B A B B B A A A A B B B B A B B A B A B B A A B

B A A B B B B B A A B B B B A A B B B B A A B B B B A A A  
A A A B A A B B A A B A B B A B B A B B A B B B A A B  
A B A B B B B B A B B B A B B B B A A A A A A B A B B B  
B B B B A B B A B B B B B B B A B B A A B A B A B A  
A B B B A B B A B B B A B A B A A B B A A A A A A  
A B B A A B A B B A A A A - B A B B A B B A A A  
B B B A A A B B B A A B A B B A A A B B A B B A  
A B B B B B A B B A A A A B A B A B A A A B B B A  
A A A A A B A A A A B A A A B A B B B A A A B A A A  
A A A B B A A A A A A A A A B A B A B A A A A A A  
B B A A A B B A B B B B B B A B B A A A B B A A A B  
A B B A B B A - - - - - A A B A B A A A A A A B  
B A B B B A B A A B A A B A A B B A B B B A A B B A  
B A B A A A B A A A A B A A A A A B B A A B - B A  
B B A A B B A A B B A A B B A A A A A A B A B A A A  
- A A - B B A A A - B A - B - - A - A A - - - A  
B B B A B A B B A B A A A A B A B A B A B B B A  
B B B A A B B B B B A A A A A - A B A A B B B B B  
B A B B A A B A A A B A B B B B A B A B A A A A B  
B A B A A A B A A A A B A A A A A B B A A B B B A  
A B A A B A A B A A A A A A B B A A B B A A B B A  
B B A B B B A A A B A A B B A B B A B A B B A A B  
A B B B A B B B B B B B B B B B B B B B A A B A B  
- B A B B A B B A B A B A A B B A A B B A A A B B A  
B A A A A A A A B A A B A A B A B B A A B A A A  
A A B B B A A A B A A B B A B A B B A B A A A A  
A B B A A B B B B A A A A A B A B B A B B A A A  
A A A A A A A B B B B B A A B B B B B A B A A A  
B A A A A B B B B B B A A A A A B B B B B B B  
B A A B A A B B A A B B B B B B B B B B A B A B A  
B B A A B B B A B B B - A B B A A A B B A A A B  
A B B B A B B A B B B A A A A A A B B A A A A A  
A A A B A A B B A B B B B A B B A B A A B B A B  
A A B B B A A A B A A B B A B A B B A B A A B A  
A A B B B A A A B A A B B A B A B B A B A A B A  
A A B B B A A A B A A B B A B A B B A B A A A A  
A A B - B A A A B A A B B A B A B B A B A A B A

B A A B A B B B A B B B B B B B A A A B A B B B  
A B A B B A B B A B A B B A A B B A A A B B A A  
A B B B B B B A B B B A A B A B B A A A B B A B A  
A A A A A A A A B B B B A A B B B B - B B A A A  
B A B B A B A A A B B A B B A B B A A A A A A A  
B A A A A B A A A B B B A B - A A B B A B B B A  
B B A B A B A A A B B A B B - B B A A A B A A A  
A B A A B B A B A A A A A B - A B B B B B B B A  
A B A A A A - A A B A B A B A B B A B B B A A B  
B A A B A B B A A A B A B A B B A B B A A B A B A  
B A B A A A B A B A B A A A A B B A B B A A A A  
A B A B B B B B A B B A B A B - B B B B A A A A B  
B B B B A B B A B B B B B B - A B A A B B A B A  
A A B B A A A B A A B A A A B B B A A A B A B A A  
A A A B A B B A A B B B - B B B B B B A B A A A  
A A A B B B B B A A A A B B A A A A B B A B B A  
A B A B B B A A A B A A B A B A B A A A - B B A B  
B B A A B B B B A B A A A A B B A - A A - A A A  
A B B B B B A B B B B B B B A B B A A B A B A  
B A B B B A A A A A B B B B A B B B A B A A A  
- A B B A A B B B B - A B B - B B A A A B B B B  
A A A A A B B B A B B A A - A A B B B B A A B  
B A B B B B A A - A B A B A - A A B A A A B B A  
A A - A B B A A B B A A A A B A A B A A A A B B  
A B A A A A B A A B A B A B A B B A B B A A A B  
B B A A B B B B A B A A A A A A A B A A A A A B  
B B A A B B B B A B A A A A A A A B A A A A A B  
A B A B B B A B A B A B A A A A A B B B B A B

A B A B A A B B B A B B B B B A B B A B A A B  
A B A A B A A B A A A A A B B A A B B B A B B A  
A B A A B A A B A A A A A B B A A B B B A B B A  
A A A A A A B A A B A A A A B A B B B A A B A A A  
A A A A A B B A B B A A A A A B A A B A A A A B B  
B B B B B A B B A B B B B A B A A B A B B A A A  
B B A B A B A B A B A A B B B B A B B A A A A B  
B A A B B B B B A A B B B B - B A B B B A B A A  
A B B A B A B B B B B A A B B A A B A A A A B A  
B A A A A A A B A A A A A A A B A A B B A A A B  
A A B B A A B B B B A A B A A B - - B B A A A B B B  
B A A A A A A B A A B A A B A A B A B B A A B A A A  
A A A B A B B A A B A A B B A B A B A B B A A A  
A B A B B B B B A B B A B B - B A A A A A B A B B  
A A B A A A A B B A A B A A B B A B A B A A A B B  
A A A A A B B A A B A A A A A B A A A A B B B B A  
A A B A B A B B A A A A B B A B A B A A B B A A A  
A A A A B A B A B B A A A B B A A B B A A B B A A  
A B A A B B B B A B A A A B A A A B B A A B A A A  
A A A A B A B A A A A A A A B B A A A B A B A A B  
B B A A B A A B A B B B - B B A B B A A B A A B  
A A A A B B A A A A A B A A A A B B B B A B B  
B B A B B B A A A B A B B A A B A B A B B A A B  
B B A B B B A A A B B B - A B B A B A B B A A B  
A - B B B B A A A B B A - A A B A A B B B A A A

A - B B B B A A A B B A B A A B A A B B B - A A  
B - B A A A B B B A B B A B B B B B B A A B A B  
B - B A A B B B A A A A B A A A B B A A A B B B B  
B - - A A B B B B B B B B - B B B B B B A A B A B  
B B - A B B B A B B B A A A A A A B B A B A A A  
A - A A B B B A B B B A A A A A A B B A - A A A  
A - B B A B B A B B B A - A - A A B A A A A A A  
A - B B A B B A B B B A B A B A A B B A A B A A  
B - B B A B B A A A B B B A B A A B B A A B B B  
A - B B A - A B A A B B B A B A A B B A A B B B  
B - A A A B B A B B B B A B B A A A B B A A A B  
A - B B A - B - A A A - - B - A A - B A A - - A  
A - A A B B B A B B B A A A B A A B B B A B B B  
B - - B B B A A - A A A B B A A A B B A B A A A  
A - - B B B A B B A B A B A A A A A A A A B B A  
A A B B B B B B A A A B B A B A A A A A A A B B B  
A B A B B B B B A B A B A B B B B B A A A A A B  
A B A B A A A B A B A B A B B A B B A B B B A A B  
A B B B A A A B B B A B B B - B - A B B A B B B  
B B B A B B B A A A A B B A B B B B A A A B B B B  
B A B B A B A A A A B B A B B B B A A A A A A A  
B B B A B A B A A A A B A B - B B A A A B B B B  
B B B A A B B A A A A B A A - B B A A A B B B B  
B A A B - A B A B A B A B A B B B B A B B B A A  
B A A B B A B A B A B A B A B A - B B B A B B B A A  
B B A B A B A A A A B B B B B A B B B A A B A A A  
B B B A A B B A A A A B A A A A B B B A A B B B B  
B - B A A B B A A A A B A A - B B A A A B B B B  
A A B A B B B A B B A A A A A A A B A A B A A A  
A A B A A A A A A A B B A A A A A A A B B A A A B  
B A A B B A B A A A B B B B B B A B A A B A B B  
B A B A A B B B A A B B A A - A B B A A A B B A  
B A B B A A B A A A B B A A - A B B A A A B B A  
B A B A A A B A A A A B A A - A B B A A B B B A  
B A B A A A B A A A A B - A - A B B A A B B B A  
B A B A A A B A A A A B A A B A B B A A B B B A

B A A A A A A A B A A B - A - A B B A A B A A -  
B A A A A A A A B A A B A A A A B B A A B A A A  
A B A A A B A A B A B A A A B B B B B A B B B  
A B A A A B A A A B A A A B A B B A B A A A A A  
A A B B A B A A A B A A A A A B A A B A A A A B B  
A A B A A B B A B B A B B A A A A - A A B A A A A B B  
A A B A B B A A B B A A A A A A A B A A A A B B  
A A B A B B A A B B A A B B A A A A - A A B A A A B B  
A A A A B B B B B A B A B A B B A B B A A B B A A  
A B A B B B B A B A B A A B A A A A A A B B B A B  
A B B B A A A B A A B A A B - - A - A A A A A A A B  
A B B B A A A B A A B - B A - A A A A A A A A A B  
A B B B A A A B A A B - B A B A A A A A A A A A B  
B B B B A B B A B B B A B A A A - B B B B A B B A B  
A B B B B A B B A A B B A B B B A B A A B B A A A  
B B A B A B B A A B B A B B A B B A B - B A A A  
A A B A A A A A A A B A B A B A B B B A B B A B A A  
B B B B A B B A B B A B B B B B B A B B A A B A B A  
B B B B B A A A B A A A B A A A B B A B B A B A B B  
A A B A A B B B A B A A A B B A B - B B A B B A A A  
A B B B A B B A B A B B B B A B B B A B B A A A  
A B B B A B B A B B B A B B B B B B B A A B A A A  
B B B B A B B A A B B A - A B B B B - B B B A B B A A  
B A A A A A A B A A B A A A - B A A A B A B B A  
A B - B B - B A B B A B B B A A B B B A B A A B  
B B B A B A A B B A B B A B B A B B B B B A B A A A  
B - A A B B B B A B A A A A A A A B B A A A A A B  
B B A A B B B B A B A A A A A A A B A A A B A B  
A B B B A A B B B B A A B A A A B A B A B B A B  
A B B A A A B B A A A A A A - A B A B B B A A B  
B A A A A B A A B B B A A A A B B A B A A B B B  
A A A A A B B B A B B A A A A A B B B B A A B  
A A A A A B B B A B B A A - A A B B B B A A B  
A A A B A A B A B B B B - B B A A A B B A A A B  
A A A B A A B A B B B B B A A A A B B A A A B



B B B A A A B B B A B B A A A B A B A A B A A A  
B B B B A A A A B A A A B B B A B B B A B A B B  
B A A B A A - B B B B A B B - B B B B B B A A  
B B B A B A A A B B A A - B - A B A B B B A A B  
B A A B B A B A B A B A B A A B B B A B B B A A  
A A B B B B A A A B B A A B B B A B A B A B A A B  
A A B B B A A A B B A A B B A A B B B A B A A B  
A B B B A A B B B B B A B B - A B A B B A A A B  
A A B B A A B B B B B A - B - A B A B B A A A B  
A B B B A B B B B B B A B A B A B A B B A A A B  
A B B B A B B B B B B A B A B A B A B B A A A B  
A B A B B A B B A A A A B B B A A B B A A B B A  
A A A B B A B B A B A A B B A A B A B A A B B A  
A A A B B A B B A B A A A A A A A B A B A B B A A  
A A A B B A B B A B A A - A A A B A B A B B - A  
A B A A B A A A B B B A A A A B A A A A A B B A  
A B A A B A A A B B B A A A A B A A A A A B B A  
A B A A B A A A B B B A A A A B A A A A A B B A  
B A A B B A B A A B B A - A A A B A B A B B B A  
B A A B B A B A A B B A B A A A B A B A B B B A  
B A A B B A B A A B B A B A A A B A B A B B B A  
B A B B B A A A A A A B - B B A B B B A B A A A  
B A A B B A A A A A A B B B B A B B B A B A A A  
B A A B B A A A B A A A B - B B A A B B A B A A A  
A B A A B A A B A A A A A A B B A A B B B A B B A  
A A A A B A A B A A A A A A B B A A B B B A B B A  
A B A A B A A B A A A A A A B B A A B B B B B A  
A B A A B B A B A A A A A A B B A A B B B B B A  
A B A A B B A A A A A A A A B B A B B A B A A B  
A B A A B B A A A A A A A B B A B B B B B B A  
A B A A B B B B A A B A B B A A B B A A B B A A



A B A B B A A A B A A A B B A B A B A A B A A A  
B B B A A A B B B A A B A B B A A A B B A B B A  
B B B A A A B B B A A B A B B A A A B B A B B A  
A B A B A B B B - A B B B B B B A A B A B B A B  
B A A B A B B B A A B B B B B B A A B A A B A A  
A A A B A - B B B A B B A - A B - A A B - B B B  
A A B B A B B B A A B B B B B B A A B A B B A A  
B A B B A B B A B B A A A B A B A B B B A B A A  
B A A B A B B A A A B A B B - A B B A A B A B A  
B A A B A B B A A A B A B B - A B B A A B A B A  
A A A A B A B A A B A A A B - B B A A B A A B B  
A A B A B - B A A B B A A A A B A A A B A A B B  
A B A B B A A A A A B A - A A B B - A A A A A B  
A B A A B A A A A B B B A B B B B A A A A A A  
A B A A B A A A A B B B A B B B B A A A A A A  
B B A A B B A A B B A A A A A A A B A B A A A A  
A B B A B A A A A B A A B A B B A - B B A A  
A B B A B A B A A A B A A A B A B B B A A B B A A  
A A B A B A A A B A - A A A A A - B B B B A A B  
A B B B A A B B A B B B B A A B B B B A A B B A  
A B A B A A B B A B B B B A B B A B B A B B A B  
A B A B A A B B A B B B B A B B A B B A A A B A B  
A B A B A B A B A B A B B B B A B B A B A A A B A B  
A B A B A B A B A B A B B B B A B B A B A A A B A A  
A B A - A A - A A B A - A B A B - B - A B - A B  
A B A A A A B A A B A A A B A B B A B A A A A A  
A A A A A A B A A B A A A B A B B B A A B A A A  
A A A A A A B A A B A A A B A B B B A A B A A A  
- A A A A A B A A B A A A B A B B B A A B A A A  
A A A A A B - - A B A A B B - B - B A B B A A A  
B B B B A A B B A B B B B A B A A B A B B A A A  
A A B A A B B B B A B A A B A B A B B B B A A B  
B A A B B A B A B A B A B B B B A B B B A A  
A B A B B - B B A B A B B B B B A A A A A A B  
A B A A B A A B A A A A B B A A B B B A B B A  
A A B A B A A A B A B A A A A B B B B B A A B

A B A A A B B A A B A A A A A B B B A A B A A A  
A A A A A A A A B B B B A A B B A B B A B A A A  
- A A A - A B B B A B B B - - B - - - - - B  
A B A A B A B B B B A B A - B - - B A A B B A A  
B B B A A A B B B B A B A B A B A A B B A A B B B B A  
B B A B A A A B B B B B A A B B B B B B B B B B B  
A A B B B B A A A A A B B B B - A A A B B B B A  
A B A A B B B A B B A B B A A A B B B B B B A B B  
A - A A A A A A B B A B B A A A B B A A A A A B  
A B B B A B B A B A B B B B A B B B A B B A A A  
A A A A B A B - - A A A - A A B A A A A A B  
A B A B B B B A B A B A B A B A A A B B B B A B  
A A B B A B A B A A A B A A A A A A A A A A A A B  
A A A A B A B A B A A A A A A A A A A A A A A A B  
A A A B A B B A A A B A B B A B A A A B B A A B B  
A A B B B A A A A A A A B B A B - B A A A A A A B  
A A B B B A A A A A A A A A A A A A A A A A A A B  
B A A A A A A A A A A A A A A A A A A A A A A A A  
B B B A B A B A A A A A A A A A A A A A A A A A A  
A B B B B B A A A B B B A B A B A B B A A B B B A A B  
A B B B A B A A A B B B A B B B A A B - A A B B A A A B  
A A B B B B B B B B A B B B A A A A B B B B B B B  
- - B A B A B - - A A B A A - - - - A - A A - -  
A B A B A B A B A B B B B A B - B B A A A B B A  
A A A A A A A A B B B B A A B - A B B A B A A A  
B B B A A A B B B B A B A B A B A A B B B B B A  
B A A B B B B B A A B B B B B - A B B B B B A A  
A B B B A A B A A A A A B A B - B A A A A B B B  
B B B A A A B B B A B B B A A - A B A A B A A A  
A A B A A A B B A A B B A A B - B B B A B A A A

B A B B A B B A A A A A A A B B B A B B B A A A  
B A A B B A B A A A A B A A - A A A B B B B A A  
- - A A A A A - - - B B A A - - - - B B A A -  
A A A A A A A A B B B B - A B - A B B A B A A A  
A A A A A - A - B B B B A A - - A B B A B - - A  
A A A A A A A A B B B B A A B - B B B A B A A A  
B A B - A B A A A B B A B B A - B A A A A A A A  
A A B B A B B B B B A B B B A - A A B A A B B A  
A A B B A B A B A A A B B A B - A B B A A B B B  
A A B B B A A B B B A A B B B - A B A A A A A B  
A A B - A B - B A A A B B A B - A B B A A B B B  
A A B B A B A B A A A B B A B - A B B A A B B B  
A B B B A B B A B A B B B B A - B B A - B A A A  
A B A A B B A B A A A A A A B - B A A B B A A A  
A A A A B B A A A A A A A - - B B A B B A A A

---

| 44 | 45 | 46 | 47 | 48 | 49 | 50 | 51 | 52 | 53 | 54 | 55 | 56 | 57 | 58 | 59 | 60 | 61 | 62 | 63 | 64 | 65 | 66 | 67 |
|----|----|----|----|----|----|----|----|----|----|----|----|----|----|----|----|----|----|----|----|----|----|----|----|
| A  | B  | A  | B  | B  | A  | A  | A  | B  | A  | B  | B  | A  | A  | A  | B  | A  | B  | B  | B  | A  | -  | B  | A  |
| A  | B  | B  | B  | A  | B  | B  | B  | A  | A  | B  | B  | A  | A  | A  | A  | B  | B  | B  | B  | B  | A  | B  | B  |
| A  | A  | A  | A  | B  | A  | A  | B  | A  | A  | A  | B  | A  | B  | B  | B  | B  | A  | B  | B  | A  | -  | B  | A  |
| B  | B  | B  | B  | B  | A  | A  | B  | A  | B  | A  | B  | A  | B  | B  | A  | B  | A  | A  | A  | B  | B  | A  | A  |
| A  | B  | A  | B  | A  | B  | B  | A  | A  | A  | B  | A  | A  | B  | A  | B  | B  | B  | B  | B  | B  | B  | B  | A  |
| A  | B  | B  | A  | B  | B  | -  | B  | A  | B  | A  | B  | -  | A  | B  | B  | A  | A  | A  | B  | A  | B  | B  | A  |
| A  | B  | A  | A  | B  | B  | B  | B  | A  | A  | A  | A  | B  | A  | B  | A  | B  | B  | A  | B  | A  | A  | A  | B  |
| B  | A  | B  | A  | A  | B  | B  | B  | B  | A  | B  | B  | B  | B  | A  | B  | B  | A  | A  | B  | B  | B  | A  | B  |
| B  | B  | A  | B  | -  | B  | B  | A  | A  | A  | B  | A  | A  | B  | A  | B  | B  | B  | B  | B  | B  | B  | B  | A  |
| A  | A  | B  | A  | B  | B  | A  | B  | B  | A  | B  | -  | B  | A  | A  | B  | A  | B  | A  | A  | A  | B  | A  | A  |
| A  | A  | A  | A  | -  | B  | A  | B  | A  | A  | B  | B  | A  | A  | A  | A  | A  | B  | A  | A  | B  | B  | A  | A  |
| B  | B  | A  | B  | B  | B  | A  | B  | A  | A  | A  | A  | B  | B  | A  | A  | A  | A  | A  | A  | A  | A  | B  | B  |
| B  | B  | B  | B  | A  | A  | A  | B  | A  | A  | B  | A  | B  | B  | A  | A  | A  | A  | A  | B  | B  | A  | A  | A  |
| A  | B  | A  | B  | B  | A  | A  | A  | A  | A  | B  | B  | B  | B  | A  | A  | B  | B  | B  | B  | A  | B  | A  | B  |
| B  | A  | B  | A  | A  | B  | A  | B  | A  | A  | A  | B  | B  | B  | A  | A  | B  | A  | B  | B  | A  | A  | B  | A  |
| A  | B  | A  | A  | -  | A  | B  | B  | A  | A  | B  | A  | B  | A  | A  | A  | B  | A  | A  | A  | B  | A  | A  | A  |
| A  | A  | B  | B  | B  | B  | A  | B  | A  | A  | A  | B  | A  | B  | A  | B  | B  | B  | A  | A  | B  | A  | A  | B  |
| A  | A  | B  | A  | A  | B  | A  | B  | -  | A  | B  | A  | A  | A  | B  | A  | B  | A  | A  | B  | B  | A  | B  | B  |
| A  | A  | B  | A  | A  | B  | A  | B  | A  | A  | A  | B  | A  | A  | A  | A  | B  | A  | B  | B  | A  | A  | B  | B  |
| B  | A  | A  | B  | B  | A  | B  | A  | B  | B  | B  | A  | A  | B  | B  | B  | B  | B  | B  | B  | A  | A  | A  | A  |
| A  | A  | B  | A  | B  | B  | -  | A  | A  | A  | B  | B  | A  | A  | B  | B  | A  | B  | A  | B  | A  | A  | A  | A  |
| B  | B  | B  | A  | A  | A  | B  | B  | A  | A  | B  | A  | A  | A  | A  | A  | B  | A  | B  | A  | A  | A  | A  | B  |
| A  | A  | A  | A  | B  | A  | A  | B  | B  | A  | A  | B  | B  | A  | A  | A  | B  | B  | A  | A  | A  | A  | B  | A  |
| B  | A  | A  | B  | B  | A  | A  | B  | A  | A  | A  | A  | B  | A  | B  | A  | A  | B  | A  | A  | B  | A  | A  | B  |

A A A B A A B A A A A B B B A B A A A A A A B B  
B B A A B A B B A A B B B A A A A B A B B A B A  
A B A B B B B A A B B A A B A B B B B B B B A  
A B B A A A A A A A A B A B A B A A B A B A B  
B A A A A A B A B B A B A B A B B A B B B A B  
B B A A B A A A A A A A B A A A B B B A A B A B  
B A A B B A A A A A A A B A B B B A B A A B A A  
A A B B A A A A A A A A B A B B B B A A A B A B  
A A A B - A A A A A A B B A B B B B B B A A A A  
A A B B - B A B A A A B A A B A B B B A A B A A B  
A A B A A A A B B B A A B B A A B B B A A A B B A  
B B B A B B B A B A B A B B A A B B B A B A B A B  
- A A A A B B B A A B A A A A A A B A A A B A B A  
B B A B B B A A A A A A B A B B B B A B A A A B A  
B A B A A B B B B A B B A B B A B B A A B B A B  
A A B A B A A B A B B A B A B B B A B B A A B A  
B B B A B A A B A B A B A B A B B A B A A A A B B  
A A B B A B A A B A B A B A A B A B A B A A A B B  
- A B A A B A A B A A A B B B B A B A A A B B A A  
B A B A B A A B A B B A B A A B B A B B A A A A  
A B A A B - B B A A B A B A A A B A A A B A A A  
A B A A A B B B A A B A B A A A B A A A B A A A  
B B B - - A A B A B A B A B A B A A A B A A A B B  
B B B A B B B B A A A B A A A B A A B A A A A A  
A B B A B A A B B A A B B A B A A A B B A A B A  
A A B A B A A B A B B A B A B B B A B B A A A A  
B B B B B B B A B A B A A A B B A A A B A - -  
B A B B B B A B A B A A B B A B B B A A B B B

A B A A B B A A B A B A B A A B B A A B A B  
B A A A B B B B B B B B A A B A A A B A A A B  
B A B A B A A A B B B A A A B B A B B A A B A A  
B A B A B B B B A A A B A A A A A A B B A A A B B  
B B B B B B B B - A B A A A A A A A A B B B A B B  
A B B A B B B A B A A A B A A A B B A A A A B A B A  
B B B A B A A B A B A B A B B B A B A A A A A B B  
A A B B B B B B A A A A A B A A A B B A A A A A A B  
A B A A A A A A A B A A A B A A B B B B B B B B A  
A A B A B A A A A B A A A A B B A A B B B A A A A  
B A A B B B A A B B A B B B A B A A B A A A A A B  
- B A B B A A A B A A A A A A A B B B A A B B B A  
B A A A A A B A B B A A A B A B B A B B B B A B  
A A B A B A A A B B B A A A B B A B B B A A A B  
B A A B - B A A B A A A A A B B B B A A A A A B  
B B A A B A B B A A B A A A B B A A A B A A B B A  
B B A A B A B B A A A B B B A A A A A B A B B A B A  
A B B B B A B A A A B B B A A A A B A B B A A B  
A - A A B A B A A B - A B A A A A A B B A B B A  
B A A A A A A B B A A B A B A A A A B B A A A A  
A B A B A B B B B A A B A A A A B A B A B B B A  
B B B A B B A B B A B B A B B B A A B A B B A B A  
A B B B - A - A A A B B B - A A A A A B B A A B  
A B B B B A B A A A B B B A A A - A A B B A A B  
A B B B B A B A A A B B B A A A A A A B B A A B  
A A A B A - B B A A A B A A A B B B B A B B A B  
A B B B B A B B B A B B B A A B A B B B A A B  
A A B A B B A A B B B A A A B B A A A B A A A B  
B B B A B B B A B A A B A B A A B B A B B A B A  
A B A B B A A B B A A B A A A B B B B B B B B B  
A A A B B B B B B A B A A B B A B A A B B B - A  
A A A A A B A B A A B B A A A A A B A A B B A A  
A A B A B B A A B B B A A A B B A A A B A A A B  
A B A B B A A B A B B B B A A B B B B B B B B  
B A A A - - A B B A A B A B A A A B B A A A A  
A B A A A B B B B A B A B B B B B B B B B B A



A B B B B - A A A B B A B A A A A A A B B A A B  
A B B B B A A A A B B A B A A A A A A A B B A A B  
A B A A B B A A B B A A B A A A A B B A B B A B B B B  
B B A B A A A B A A A B B A B A B A B B A A B B A A  
A A B A B A A B A B B A B A B B B A B B A A A A A  
B A B A B A A A A B B B A B A B B B B B B B B A A  
A A B B B A A A A B A B B A A A B A A A B A A A B A B  
A B A A A A B B A A B A A B A A A A A B B A A A B A  
A B B A B - A A B A A B A A A A A A B B A B A A A  
B A A A B B B B B B B B B B B B A A B A A A B A A A  
A A A A - B A B A A B B A A A A A A B A A B B A A  
B A B A B B A B A B B A A B B A B B B B B B B A A A  
A A A A - B A B A A B B A A A A A A B A A B B A A  
A A B A B B A A B B B A A B A A A B A A A B B A A  
A A B A B A A B A A A B B A A A B B A A A B B A A A  
A A A A - B - B A A B A A A A A B A A A B A A A B A  
B A B B - B A B A B - A B B B B B B B A B B B B B  
A A B A B B A A B B B A A A B B A A A B A A A B  
A A B A B A A A A B A A B B B A A B B A A A A A A  
A A A A A B B B B A A A B B B A B A A A A B A A

A A A B A B B B A A - - A A A B B B B A B B A B  
A A B B A B B A B B B A A B A B B A B B B B B B A  
A B A B B A A A B A B B A A A B A B B B A A B A  
A A A A B A B A B B A A A A B A A B A B A A A A A  
A B A B B A A A B A B B A A A B A B B B B A A B B  
A B B B A A A B A A B A B A B A B B B B B B - -  
B B B B A - B B B A A B A A A A A B A A A A B B  
A B A B B B A A A B B A A B A B B B B B B B B A  
B B A B A A A B A A A A B B B A A B A A B B A A  
B B B A A B B A A A A B A B A A B B A A B A B A  
A A A B A A A A A A A B B B A A B A B B A A A  
B B B B B A A B A B A B A B B A B A A A A B B A A  
A A A B A A B A A A A B B B A B A A A A A A B B  
B B A A B B A A B A A A B B B A B B B B B A B A  
A B B B B A A B A A B B A A A B A A B B B B A A  
A A A A B A B A B B A A A A B A A B B B B A B A  
B A B B A A A B A B A A B B A B B A B B A A B B  
A B A A B B B A A A A B A B A A B A B A A A A B  
B B B A A B B A B A A A A A A B B B B A A B B  
A B B B A A B B B A A B A A A A A B A A A A A B  
A B A A B B B A B A A A B A B A A A A A A B A A  
B A A A A A B B A B B A B B B B A A B A B A A A  
B B A A B A B B - B B B A B B A A - B B A A A  
B B B A A A B B A A B A A A A A A A B B A A B  
B A A A A B A B B A B B A B A A B B B B A A A A  
B A B A A B B B A B B B A B B A A B B B A B

A B A B B A B B A A B A B A A A B A A A B A A A  
A A B A B A A B A B B A B A B B B A B B A A B A  
A B B B B A A B A A A B A A B - B A B B B A B A  
A A A A A B A B A A B B A B A B B A B A A A B B  
B A A A B B A B B A A B A A B A B A A A A B B A A A  
A A B A B A A B A B A B B A B A B B B A B B A A A  
A B A A A B B A B A B A A A A B B A B A A B B A A A  
A A B B A B B B A A A B A A A A B B A A B B A B A  
A A B B B B B A B A A A A B A A A B A A B B A B A  
- - - - - - - - - - - - - - - - - - - - - - - - -  
A A B A B A A A A B A A A B B A A B B B A A A A  
A A A A A B A A A A A A B A A B A B B B B B A B  
B A A B B B A A B A A B A A A A A A B A B A A A A  
B B B B A B B A B A B A A A B B A A A A B A A B  
A - B B A A B A A A A A A B B B B B A B A B A A A  
A A A B A A A A A A A A A B A A A A B A A A A A  
A A B A A A B B B B A A B B B B A A A B B A A A A  
B B A B - B A A B A A B B B B A A B B B B B B A  
B B A B - B A A B A A B B B B A A B B B B B B A  
B B B B A B B B B A A B A A A A A A B A A A B B  
B B B B A B B B B A A B A A B A A A A B A A A B B  
B B B A B A B B A A B A A A B A B A A B B B A B A  
A A B B B A A A A A A A A B B B B B A B A B B A B  
B A A B B A B A B A B B B B A B B B A A B A B A  
B A B B A A B A B A B A A B B B A A A A A A B A  
A B B - B B B B A A B B A A B A A A B A - B B A A  
B B B A A A B B A A B A A B A A A B A B A B A A B  
A B B A B B B B - B A B B A B B B A B A A B B A  
- B A B B B B A A B B A A B A B B B - A B B B A  
A A B A B A A B A B B A B A B B B A B B A A A A  
A A B A B A A B A B B A B A B B B A B B A A A A  
B B A B B B A A A B A A B A A B A B A - A B A A B B  
B B B B A B B A B A B A A B B B A - A A B A A B  
B B A B A B A A A A A A A B A B B B B A B A A B B A  
B B B B A B A A A A A A A B B B B B B A B A A A A  
- B A B B A A A A A A B - B B A A B B B A A B A B  
B A B A B B B B A B A B A B A A B A A A A B - A  
A B B B B B B A A B B B A A A B A A B B - A A

A B B B A B A B A A A B A A A A B B B B A B B A  
A B A B B A A A B A B B A A A B A B B B A A B B  
B B B B B - B A B B A B B B B A A B A B A B A  
A A B A B A A B A B B A B A B B B A B B A A - A  
B A A B A B B B A A A B A A A B B B B B A B B A B  
B B B A A A B B A A B A A B A B A A B B B A B A A  
B B A A B A A A A A A B A A A B B B A A B A B B  
A A A - B B A A B A B A B A B A B A B A A B B B  
A A B B A A A A A A A B B B B B B A A B - A B  
B B B B B A A A A A B A B B A A A A A B B A A A  
A A A A A B A B A A B B A B A B B A B A A A B B  
B A A A B B A B B A A B A A B A B A A A B B A A A  
B B A A B A A A A A A B A A A B B B A A B A B B  
A A B A B A A B A B B A B A B B A B B A A B A  
A A B A B A A B A B B A B A B B A B B A A B A  
B B A A B B A A A B A A A B B B A B A A A B B A A  
A A - A - A B B - - - B A B B A B B B B B A A  
A A A B B A B A A B B B B A B A A B B A A A A  
B A B B B B B B A A B A B B B B B B B B B B B B

- B A A B A A A A B A B B A A B B A A A B A B B  
B B A B B A B A B A A A B B A B B B B B A A B B  
B B B B B A B A B A A B B B B A B A B A A A B  
A A B B A B B B A A A A B B A A B A A A A A A B  
B B B B B B A A A B A B B A A A A A A B B A A A  
B B B B B B - A A A B A B B A A - A A B B A A A  
A A B B A A B A A A A B A B B A B A A B A B A B  
B B B A B B - B A A A B B A B A B A - B A A B A  
A A A A B A A A B A A B A B B A A A A B A A A A  
B B A B A B A A A A A B A B B B B A B A A B B A  
A B A A A A - B A A A B B B A A B A B B B A B A  
A B B B B A B A A A B B B A A A A A A B B A A B  
B B B A A B A A A B A A B A A B A B A A A B A A  
B B A B B B A A A A A B A A A B B A A B B B A B A  
A - A - B A - A - A - - B A - - A - - B A A - A  
A A B B B B B B A A A A A A A B A B B B B A B B  
B B A B A A A B A A A B B A B A B B A A B B A A  
B B B B A B B A B A B A - A B B A A A A B A A B  
A A B B B A A A A A A B B B B B A B A B B B A B  
B A B B B B A B A A B A B B B B B B B A B B B B  
B A B A B B B B A B A B A B A A B A A A A B B A  
A A A A A A A B A A B B A A - A A B A A B B A A  
A B A B A B A B B A A A A A A B B B A A B B B A  
B B - B B B A B A A A A B B A A A A A A A A B B  
B A A A A A A B B A A A A B A A B B B B A A A A  
A A - B - A B A A A A B A B B A B A A B A B A B  
A A B A B A A B A B B A B A B B B A B B A A B A  
B B A A A A A B A A A B A A B B B A B B A A B B A  
B A B A A A A B B A B B A A B A B A A A A B B A B  
A B B B B A B A A A B B B A B A A A A B B A A B  
B B B B B A A A A A B A B B A A A A A A B B A A  
B A A A A B B B B A B A B B B B A A A A B A A A  
B A A A B B A B B A A B A B A A A A B B A A A A  
B A A A A A A B B A A B A B A A A A B B A A A A  
B A A A B B A B B A A B A B A A A A B B A A A A

B B B A B A A B A B A B A B B B A B A A A A B B  
A B A B A A A B B A A A A A A A B B B A A B B B A  
B A B B B B B A A A A A A B A A B A A A A A A B  
A A A - B B A A B A B A B A B A B A B A A B B B  
A A B A B A A B A B B A B A B B B A B B A A B A  
A A A B A B B B A A A B A A A B B B B A B B A B  
B A B B B B B B A B B B B A A A B A B A B A A B  
A A A B B B B B B A A A A A A A B B B B A B B A B  
A A B B A A A A A A A B A A B A A A B B A B A B  
A B A B B B B A A B B A A B A A B A A A B B A B B  
B B A A B B A B B A A B A A B A A A B B A B B B  
A A B A B B A A A A A A A B B A A B A A A B A A A  
B B B B A B B B B A B B B A A A B B B A A B B  
B B A B B A A B A - A A B A B A A B B B A B A A  
B B B A A A A A B A B B A A B B A A B B B A B B  
B B B A A A A A A A B B B A A A A A B A A A B B  
A B B A B A B A A A A A A B B A B B B B B A B  
A A A B A A A A B B B A A B B B A A A B B A - A A  
B A B B B B B A A A A A A B A B A A B A A A A A B  
A A A A A B A B A A B B A A A A A B A A B B A A  
- B A B - B A A A A A B B B B A A B B B B - B A  
B B B A A A A B A B A B A B B A B A A A B B A A  
A A A B B A B A A B - B B - B A A B A B B - A A  
- B B B - A A B A A B B B A B B B B B B A B A  
A B A B A B B - A A B A A B A B B B B B - B A  
A A B A - A B B B A B B - B B A B B A B B - A A  
A A B A - A B B B A B B A B B A B B - A A  
- B A B - A A A B A B B A A A B A B B B A A - B

B B B B B A A A A A A A B B A B B B A B A A A A  
A A B B A A A A - A - B B B B B B B A A B B A B  
A A - B B A A A A A A A B B B B B B A A B - A B  
B B A B A B A A A A A A B A B B B B A B A A B B A  
A B B A A A A B A A A B A B A A B B B B B B B A  
B B A B A B B A A A A A A B B B A A A B B A B A  
A B B B B A A A A A A A B A A A B - B A A B A B B  
A A A A A B A A A A A A A B A A B A B B B B A B  
A B B B - B B A A - A A B B A B A A B A A A A A  
B B A B A B A A A A A A B B B B A A B B B B B A  
B B A B B B A B A A A A A B B A A A A A A A B B  
B B B B B A B A B A A B B B B B A B A B A A A B  
A B A A B B B A A A A A A A B B A B B B B A A -  
A B B A B A B A A A A A A A B B A B B B B B A B  
A A A B A A B A B A A A A A A A B A B B B A A A  
A B B B A B B B A A B B A A B B A A B B B B A B B  
A B A B B B B A A A A A A A A B B A B B B A B  
A B A B A B B B B A A A A A A A B B A B B B A B  
A B A B A B B B B A A A A A A A B B A B B B A B  
A B A B A B B B B A A A A B A A B A A B B B B A B  
B B A B B B B A A A B A A B A A B B B B B B B A  
B B B B B - B B B B A B B A A A A B B B - A B B  
B A B - A A B A B A B A A B A A B A A A B B B A -  
- A B B B B A B A B A A B B A B B B B A A B B B  
B A B B B B A B A A A A B B B B B B B A B B B B  
B A B B A A A B A A A A B B B B B B B A B B B B  
B A B B - - A B A A A A B B - B B B B A B B B B

B A B B B B A B A A A A B B B B B B A B B B B  
B B A A A A B A B A B A A B B B B A B B B A A B  
A B A A A - A A B A A B A B B B A A B B A A A A  
A B A A A - B A B A B A A B B A B A A B B A A A  
A B B B A - - B - A B A A B A A A A A A B B B A A  
B B B - - A A B A A B A B B A A A A A A B B A A A  
B B B B - A A A A A B A B B - A A A A A B B A A A  
- B B A B B A A A A B A B B A A A A A A B B A A A  
B A B A B B A A B B B A B A B B B B B A B B A A  
B A B A B A A A B B B A B A B B B B B A B B A A  
A - - A A A B A A A B B B A A A A A A B B A A B  
A A - A B A A A B B B A A A B B B A B B A A B A B  
- B B - A A B A A A B B B B B B A B A B B A A B  
A B B B B A A A B A B B B A A A A A A B B A A B A  
A A A B B B A A B A B A B A B A B A B A A B B B  
B B B B A A B A B B B A B B B B B A A B A B A A A  
B B B B - - B A B B B B B B B B A A B A B A A A  
A B A A A B B A B A A B A B B B A B B B B A A A A  
A A A B A B B B A A A B A A B B B B B A B B A B  
A B A A A A A A B A A B A B B B A A B B A A A B  
A A A - A B A B A A B B A B A B B A B A A A B B  
A A A A A B A B A A B B A B A B B A B A A A B B  
A A A B B A B B A A A B A A A A A B B B B A B B A  
B B A A A A A A B A A B A B B B A A B B A A A A  
- B - A A A A A B A A B A B B B A A B B A A A A  
A B A A B A A A A A B A A A B B A B B A A B A A  
A B A A A A A B A A A B A A B A B B B B B B A B  
B B B B - - B - - A B A A A A B A A A B B A A A B  
A A A A B A A A A A B B B B A B A A A A B A A A B  
B B B B A B B B B A B A A A A B A A A B B B A A B  
B - B B B B - A B A B A A A B - A A A A - A A B  
A A A B B B B B B B A B A A B A B A B A B B A A  
B B B B A B B A B A B A A A B B A A A A B A A B  
B B A B B B A A A B A A B B A B A A A B A A B B  
B B A B B B A A A B A A B B A B A A A B A A B B  
B B A B B - A A A B A A B B A B A A A B A A B B



B B A B B - - B A A A A B B A A A A A A A A A B B  
B B A B A A A B A A A A B B A A A A A A A A A B B  
B B A A B B A B B B A B A B A B B A B B B B A B  
A B A B B B A B A B A A A B A B A B B B B B B B A  
A A A B A A A A A A B A B A A B B B B A B B B A  
A B B A - A A B A A B A B A A B B B B B B B B A  
A B B A - A A B A A B A B B A B B B B B B B B A  
A B B B B A A B A A B B B B A B B B B B B A B A  
A B B B B A - B A A B B B A B B B B B B A B A  
A B B B A A A B A A B B A A B B B A B B B A B A  
A A A B B A A B B A A B B A B B B A A B B A B B  
A B A B B A A A B A A B A A B B B A B B B A B A  
A A A B B B B B B A A A A B B A A B A A A A A B  
B - B B A B - B A A B - A A A B B - A A - B A B  
B B A B A - A A A A B B B A A A B A B B B A A -  
B A A B B A A B B B A A A A A A B B B B A B A A B  
A B B A A A A B B B A A A B B B A B B B B B B A  
A A B B A B B B A A A A B B A B B A A A A A A B  
A B B B A B B B A A B B B A A A B A A B B A A A  
B A A A B A B A B B A A A A B B B B B B A A A A  
A A A A A A A A A A A A B A A A A B A A A A A A  
A A A B A A A A A A A A A A B A A A A B A A A A  
A A A B A A A A A A A A A A A A A A A A A A A  
A A A B A - - - A A A A B A A A A B A A A A A A  
B A B A B B B B A A A B A A A A A A A A A A A A  
A B A B A A - - B B B A B B B B B B B B B B B B  
A B B A A A A B B A A B A B A A B B B B B A A B  
A A B A A A B B B A A B A B A A B B B B B A A  
A A B A A A B B B A B B A B B - B A A B B A A A  
B B A B B B B B A A B B A B A A A A A A B A B B A  
B B A B B B B B A B B B A B A A A A A B A A A  
A B B - A A B A B A A A B A B A A B A B B A B A  
B B B A B - A B A B A B A B B A B A A A B B A A  
B B B B B A A B A B A B A B B A B A A A B B A A  
B A A B B A - B B A B B B B A B A B A A B A A A  
B A A B B A A B B A B B B A B A B A A B A A A

A A B A B B A B B A B A A A - A B A A B B A B A  
A B A A B B B B A A B A B A A A B A A B B A A B  
- - A - - B A B B A A A B B A A A B A A B A - A A B  
- B B B A B B B A B A A A B A A B B A A B B B B  
A A A A A B A B A A B B A B A B B A B A A A B B  
A A A A A - A B A A B B A B A B B A B A A A B B  
A B B A B B B B B A A B B - A A A A B B A B A B  
A B B B A A A A A B B A A B B B B B A A B A B A  
A B B A B B B B B B A A A A B A B A B A A A B  
A B A A B B - B A A A A B A B A B A B A A A B  
A B A A B B B B A A A A B A A B A A B A A A B  
B A A A A A B A A A A B A A B A A A A B B A A A  
B B A A A A B A A A A B A A B A A B A B B A A A  
B B A A A - B A A A A B A - B A A B A B B A A B  
B A A A B B B B B B B B B A A B A A A B A A A B  
B B A A A A B A A A A B A A B A A A A B A B A A  
B B A - A - B B B A B B B A A A A A B A B A B A  
B B A - - - B B B A B B B A A A A A B A B A B -  
A B B B A B A B A A A B A A A A B B B B A B B A  
A B B B A B A B A A A B A A A A B B B B A B B A  
A B B B A B A B A A A B A A A A B B B B A B B A  
B B A A - A B A A A B B B A A B A B A B B A B A  
B B A A B A B B A A B B A A A A B A B B A B B A  
B B A A B A B B A A B B A A A A B A A B B A B A  
B B A A B A B B A A B B A A A A B A B B A B A  
A A A B A A A A B A B A B B A B B A B A A A B  
A A A A - - A B A A B B B A A A A B A A B B A A  
A A B A B A A B A A B A B A B A A B A A A B A A  
A A B A A B A - - A B A B A B A A A A A B A A  
B A B A B A A B A A A A B A B A A B B A A B A A  
A A B B B A A A A A A B B B B A B A B B B A B  
A A B B B A A A A A B A B B B B A B A B B A B  
A A B B B A A A A A A B A B B B B B A A A B A B  
B B B B B B - A A A A A B B A B B B A B A A A A  
- A B B B A A A A A B A B B B - B A - - B A -  
A A B B B A A B B A A B A B B B B A - A B - B

B A A B B A B A B B A A A B B B B B B A A A A  
B A A B B A B A B B A A A B B B B B B B A A A A  
B B A B B A B A B A A A B B A B B B B B A A B B  
B B A B B B B A B A A A B B A A B B B B A A B B  
B B B A B A B B B A A B A B A B B B B B B B A  
A A B A B A B A A A A A A A B B A B B B B B A B  
A A A B B A B A A A A A A A B A A B B B A - A B  
A A A B - B B A A A A A A A B A A B B B A B A B  
A A A A A A B A B A A A - - - - - - - - -  
A A A B A A B A B A A A B A A A B A B B B A A A  
A B A A B B A B A A A B A A A B B B B B B B A B  
- B A A B B A B A A A B A A A B B B B B B A B  
A A A B A A A A B A A B B A A A B A A B A A A  
A B A A A A B B A A A A B A B B B A A A B A B B  
A A A B B - B A A B B B B A B A A B A B B A A B  
A A A B B A A A A A B B B B A B A A B B A A A  
A A B A - A A A A B A A A B B A A B B B A A A  
A A B A B A A B B B A A B B B A A A B B A A A  
B A A B B A A B A A A A A B A B A B B A A A B  
B A A B B A A B A A A A A A B A B A A B A A B  
A A B A B A A B A B B A B A B B B A B B A A A  
A A B B B B A B A B B A B A B B B A B B A A A  
A A B A B A A - B A B B A B A B B B A B B A A B  
B A A B B B A A A A A A B A B A B - A A A A A  
A B A B A B A A B A A A A A A B A B - A A A A B  
B B A B B A A A A A A A A A B A B A A A A A  
A A B B A A B B A B B A B A B B B B A B B B B  
A - A A B B A A A A B A A A B B A B B A A B A  
A B A A B B A A A A B A A A B B A B B A A B A  
A B A A B A A A A A B A A A B B A B B A A B A  
A B B A A - A A A A B A B A B A A B A B A B  
A B B A B - - - A A B A - A B A B B B B B B A  
A B A B B A A A B A B B A A A B A B B B A A B A

A B B A A A B B A A B B B A B A B A B A A A A B  
B B B A B A A B A B A B B A B A B A B B A A B A  
B B B A B B A B A B A B B A B A B B A A B A  
B B A A B B B A B A B A B A B A A B B A A A A B  
B B B B B B B A B A B A A B B A B B A A A A B  
B B A A A B B A A A B B A B A A B B A B B B B -  
B B B B B B A B B A A A B B B B B B A A A A B  
A - B B - - B B A A B B B A B B A - A A A A A A  
B B B A B - B B B A B B A A B B A B B A B B B  
B B A A B B A B B A A B A A B A A A B B A B B B  
B B A A B B A B B A A B A A B A A A B B A B B A  
A A B A A A A B A A A B A B B B B B B A B B A  
A A B B B B A B A A A B - A A A B A B A A A A A  
B A A A B A B A A A A B A A A B A B A A A A A A  
B A A B A A B A A A A A B B A B A B A A A A B A  
A B A B B B B B B A A A B B A A A B B A A A B A  
B A A B B A A A A A A A B B B B B B A A A B B B  
B A A B B A A A A A A A B B B B B B A A A B B B  
B A A A A A B A B B A A A B B B A B A A A A A A  
A A A A A B B B B A A A B B B A B A A A A B A A  
A A B A B B - A B A A A - A B A B A A A A B A A  
- A B - B B B - B A A A B A B A - A A A A B A A  
A B A A - B - A B A A A B A B A A A - A A B A A  
A - B - B - A B A - A - - B A B A - - B A B - -  
A B A B A A A B A A A A B A B B B B B B B B A  
B B A B A A A A A A A B A B B B B A B A A B B A  
B B A B A B A A A A A B A B B B B A B A A B B A  
B B A B - B - - A - A B A - B B B A - A A A B -  
B B B - B B A A A - B B A B B B B A - A - A B B  
B B A A A B A A A A B B B A A A B A B B B A A -  
B B A B B A B A B B A A B B B B B B B B A A A  
A A A A A B A B A A B B A B A B B A B A A A B B  
B B B B B - B A B B A B B B B B A A B A B A B A  
A A B B B A A A A A A B B B B B A B A B B A B  
B A A A A A B A B B A A A B A B B A B B B A B

B A B B B A A A A A B B A A B B A B B A B A A A  
A - B A B A A B A A B A - A B B - A B B A A A A  
- B - B B A - - A A A A - A A A B B A B B B A B  
- B A B B A - B B - B B A B A B B B A B B B A B  
A B B A B A A B A A B B A A B A A B B B A A B A  
B B A A A B B B B B B A B B B B B B A B B B B  
- B B B B A - A A B B B B A A A A B B B B A A A  
B B B A A A A B A B B A B B A B B B A A A B B A  
A A A A A B A - B A A B A B A - B B A B A A A -  
A A A B A A A A A A A A A B A A A A B A A A A A  
A B A A A A B B A B A B A A A A B B A A B B B  
A B A B B A A A B A B B A A A B A B B B A A B B  
B A B A A A A A A B A A B A A B A B A A B A A A  
A B A A A A A A A B A A B A A B A B A A B A A A  
B B B A B A A B A B B A A B B A A B B B A B B B  
B A B B B B A B A A B B A B A B B B A A B B B B  
- B B B A B B B B B B B A B B B A A B A A B B B  
A B B B B A A A B B A A A A A A A A A A A A A A  
A A B A A A A B A B B A B A B B B A B B A A A A  
A B A B B B A A B B A A B A A B B B B B B B B A  
A A A A A B B B A A B A B A B A A A A A A A A A  
- A B B A B A - A B A B A B A B B B A B B A A B  
A A A B A A A A A A A B B A B B B B A B A A A A  
B A B B B B A B A B A A B B A B B B B A A B B B  
B B B B B B B A B B A B B A A B B A A A B A A B  
- A B B B - A B A - A A B B B B B B B B - - B B  
B A B B B B A B A B A A B B A B B B B A B B B B  
A A B B B A A B B A A B A A B A A A B B B B B A  
- - B A B - - - - B A - B B B B - - A A A - A  
A B A A B A B A A B A A B A A A A A A B B A B B A  
A A A A B A A B A B B A B A B B B A B B A A A A  
A B A A B A A B A A B A B A B B B B B B B B A  
- B A A A A A A B A B A - A B B B A B B A B B  
B B B A A A B A A A B A A A B A A B A B A B B B  
A A B A A B A B B A B A A A B A B A A B B A B A  
A A B A B A A B A B B A B A B A B B A B B A A A

|   |   |   |   |   |   |   |   |   |   |   |   |   |   |   |   |   |   |   |   |   |   |   |   |
|---|---|---|---|---|---|---|---|---|---|---|---|---|---|---|---|---|---|---|---|---|---|---|---|
| B | A | B | B | B | A | B | B | A | B | B | A | B | A | A | A | A | A | B | B | B | B | A |   |
| - | A | A | A | A | B | - | B | A | A | B | B | A | B | A | B | B | A | B | A | A | A | B | B |
| - | A | B | A | B | - | - | - | A | - | A | A | B | A | B | B | B | A | B | B | B | - | - | A |
| A | A | B | A | B | A | A | B | A | B | B | A | B | A | B | B | B | A | B | B | A | A | A | A |
| - | A | B | A | A | A | A | B | A | B | B | - | - | A | B | B | B | B | A | B | - | A | A | - |
| A | A | B | A | B | A | A | B | A | B | B | A | B | A | B | B | B | A | B | B | A | A | A | A |
| A | A | A | B | A | - | - | B | A | A | A | B | A | A | A | B | B | B | B | A | B | B | A | B |
| - | A | B | A | B | A | A | A | B | B | B | A | A | A | B | B | A | A | A | B | A | A | A | B |
| - | A | B | - | - | A | - | - | B | A | B | A | - | A | - | B | B | B | B | A | B | - | - | - |
| B | A | B | - | B | A | A | A | B | B | B | A | B | A | B | B | B | B | B | A | B | B | A | A |
| B | A | A | A | A | A | B | A | B | A | A | A | B | A | B | A | A | B | A | B | B | - | A | A |
| B | A | B | A | A | - | A | A | B | B | B | A | B | A | B | B | B | B | B | A | B | B | A | A |
| - | A | B | A | B | A | - | A | B | B | B | A | B | A | B | B | B | B | A | B | B | A | A |   |
| A | A | A | B | A | A | A | A | - | A | A | - | A | A | A | A | - | A | A | A | B | A | A |   |
| B | B | B | B | A | B | A | B | B | A | B | B | B | A | A | B | A | B | A | B | A | B | B | A |
| A | A | B | A | A | B | A | B | B | A | B | B | B | A | A | B | A | B | A | A | A | B | A | A |



A A B A B A A B A A A A A B A A A A A A A - A B  
B A A A B A B B B B B A B A A A A A A B A A B  
A B A B A A A B A B B B A B A A B A A A A B A A  
A A A A B B A A B B A - B B B A A B B B B A A A  
B A B A A B A A B B B A A A A B B B B B A A B A  
A B - B B B B A A B B A A B A B A B A A A A - B A  
B B - B A B A A A B B B B A A A A B B B B - A B  
B A A B A A A B A B B B A A B A B B B B A A B A  
B - A B B A A A A A A B A B A B A A A A B A B A  
A A B A A B B B A A B B B B B B B B B B A A B A  
B B A B B A A B A A A A B B A B B B B B A A B A  
A A A A A B A A A A B B A B B B B B B B B A B  
A B B B B A B B B A B A B B A B A A A A B B A  
B B B B B A A B A B A B A A B B A A A A B B A A  
A - - A A B A A A B B B A B A B B A A A A - A A  
A - A A A A A B A A B B A B A B B A A A B - A A  
A A B B A A A B B A A - A A A A A A A A B A A B  
A B A A B B A B B B A B B B A B A A A A B A B A  
B A A A A A B A B B B B A B A A A A A A B A A B  
B B A B A B B B B A A A B A A A B A A A A A A B  
B - B B A A B A - A B B B B - B B A A A A A A A  
B A B A B A A A B B B B B B A A A B B B B A B A  
B - B B B A A B A B A B B A A A B A A A B B A A  
B A B A A A B B A B B B A B B A B A A A A A A  
B B B B B A B A A B B B B B A B B B B B B B B  
A A A A B B B A B A B B B A A A A B B B A B A B  
A A A B A B A B A A B A B B A B A B B B A B A  
A A A B B A B A B A B A B B B A - A B B B A - A B  
A A B A A B A A A A B B B - - B B B B B B A B  
B B B B B A B A A A B B B A B B B B B B B A A B  
B B B B B A B A A A B A B A B B B B B B B B A  
A A A B B B B A A A A B B B B A A A B B A A A B  
A B A A A B B B A B B B A B A A B A A A B A A B  
B B B B A B A B A A A A A A B B B A A A B A B A  
A A B A A B A A A A B B B B B B B B B B A B  
B B B A B A B B A B B B A B A A B A A A A A A  
B B B B A B B B B A A B A A A A B B B B A B A



A - - A B A A B B B B A B B B A A B B B A A B B B B - B A  
B B B B B A B B B A B A B B B B B A A A A B A A  
- A A A B B A A A A A A A A B A A B B B B A B A  
A B A B A A B B B B A A A A A B B A A A B B A A  
A A B A A A A B B A A A A B A B B A A A B B B B  
A B - B B A B A A B B B A B A B B B B B B A A B  
A A B A A A A B A A A B B B A A B A A B B B B A A  
A B - A A B A A A B B B A B A B B A A A A A A A  
A A A B A A A B A B A A A B B A B B B B B - B A  
B B B B A B A A B A A A B A A A B A A B B B A - A  
A B A B A A A B A A A B B A A A A B A A A A A A  
B B - B B B A B A A B B B B A A A A B B B B B A  
A B - B B B A B A A B B B B A A A B B A A A A - - B  
B A A A A B A A B B B A A A A B B B B B A B B A  
B A A A A B A A A A A A A A A B A A B B B A B A  
A B A B B B B B B A B B B B A B B A A A A A A B  
A - - B B B B A A A B B B B A A A B B B A - A B  
B A A A B A B A B B B B A B A A A A A A B A A B  
A B - B B B B A B B B B B A A A A A A A B B A B  
B A A A B A B B B A A A A A A A A A B - B A  
B A A A A B B B B A A A A A A A B A B B B A A - A  
A A - A B B B B B A B A A A A B A B B B A A - A  
B B - A B A B A B A A A A B A A A A B B B A B B A  
A B B B B A A B A B A A A A A A A A A B B A B  
A B B B B A B B A A A A A B B B B A A A A A B B A  
A B - B B B B A B B B B B A A A A A A A B B A B  
B - - A A - A B B B B B B A B A A A A A A A A B  
A A A A B - B B B A A A B B B B A A A A - - -  
B - A B B A A A A A B A B A A A A A A B A B A  
B B A B A A B B A B A A A A A B A B B B A A A  
B B B B A A B A B B B A B A A A A A A A A A B  
B B B B A B B A A A A A B A B B B B B A A B B  
B A A A B - A B B B B B - A A B A B B - - A A B  
B - A B B A A A A A B A B A A A A A A B A B A  
B B - B B A A B A B B B A B A A B A A A B - - B  
B - A A A B B B B A A A A A A A B A A A B A A A  
B B A B B B A B B B B B B B A B B A A A B B A A

A B B B B B B A B B B B B A A A A A A A - B A B  
A - - B B B B A B B B B B A A A A A A A B - - -  
A A B A A A A B A A A A B B A B B B B B A A B  
A A A B B A A A B A B B B B A A A B B B B A A B  
A A B A A B A A A A A A B B B B B B B B B A B A  
B A A A B A A A A A B B B B A B A B - B B A A B A  
A - B A A B B B B A B A A A A A B A A A A - B B  
B B B B B A B A A A B B B A B B B B B B B B B B  
A A A A A B A B A A A A A B A B B B B B B A A B  
B B B B B A B B B A B A B B B B B A A A A B A A  
B A - A B A B B - B B B A B A B A B B B B A A B  
A B - B A B B B A B B A B B A A A B B B B B B A  
B B A B B A B B A B A B A A B B B B B B B - A A  
A B B B B B B B B B B B A A A A B B B A A B A  
A A A A A B A B B B A B B B A B A A A B A B A  
A B - B B A B A B B B B B A A A A A A B B A B  
B B B B A B A A A B A A A B B B B B B A B A A  
A A B A A B A A A A B B B B B B B B B - - B A B  
B B A B B A A A A B B A B A A B B B B B B A B A  
B B B B A A A A A B B B B B B B A B A A B A A  
A A A A A B A A A A B B A B B B B B B B B A B  
A A B A A A A B A A A A B A B B A A A B - B A  
A A A A B - - B B A A A B B B B A A A - B A A B  
B - A B B A A A A B A B A B A A A A A B A B A  
B B A B B A A B A A B A A B A A A A B B B B A B A  
B - - A A B A A B A A B A A A A A B B B B A B A  
B B A B B A A A A B A B A B A A A A B A B A  
A B A A A B A A A B B B A B B B B B B B B A B  
B A A B B B A A B B B B B A B A A A A B - A A

B - - A A B A B B B B B B A B A A A A A A A A A B  
A B A A A A A B A A B B A B A B B A A A B - A A  
A - B A A B B B B A B A A - A A B A A A A A B B  
A B A B A A B A A B - B A B A A B A A A B B A B  
A A A B A A A B A B B A B B A B B A B B B B A B A  
A - - A B B B A B A B A A A A A B A B B A A A B A B A  
B B A A A B A A A B B B A B A B B A A A A A A A B  
A A A A A A A B A A B A A B A A B A A B A A A A A A  
A B A B B A A A B A B B B B A A A B B B B B A B  
B - A A A A B B A B A A A A A B A B B B A - A A  
A B A A A B A B B A A B A B B A B B A B B B B A B B  
A - - B B B B B A B B B B B A A B A B B B B A A B  
A A A B B B A A A B B A A B A A A A A B B A A A B  
B B A A A B A A A B B B A B A A B B A A A A A A A B  
A - A B A A B A B A B A B A B A B A A A B A B B  
A A - A A A A B A A A A A A B A B B A A A B B B A  
A - B B B B B A B B B B B - A B A A A B - B B  
B A A B A A B B A B B B - A A A B A A A A A B A  
B B A B A B B B B A B B A A A A A B B B B A B A  
A B A B A A A B - A B B B B B A B B B B A A B A  
A B A A B A B B B A A B A A B B B B B B B A B B  
B - A A A B A A A B - B A B A B B A A A A - A B  
A B A B A A B A A B B B A B A A B A A A B - A B  
B - A B B B A A B B B B A B B B A A A A B A B A  
B A B A A A A A A A B A A B A B B B B B A B A  
B B B B B A A B A B B B A B A A A A A A A A A B  
B A A B B B A A B B B A - A - A A A B A A A B A A  
A A A A B A A B B A A A A B B B A A A A B - A B  
B - B A B A B B A B B A - B A B B A A A A A A A  
A B A A B A B B A B B B A B A B B B B B B A A B  
B A A A A B B B B A A A A A A B A A A B A A A  
B A B A A A A A B A B A A B B B B A A A A A B A

B B B B B A B A A A B B B A B B B A A A A A A A  
A A B A A B A A A A B B B B B B B B B B B A A B  
B - - B A B A A B A B B B B A B B B B B B B A  
A - A B A - B A B A B A B A B A B A A A B A B B  
A B A A A B B B B A A A A A A A A B A A A B A A A  
A A B A A B A A A A A B B B B B B B B B B A B  
B B A B B A A A A A A A A A B A A A A A B - B A  
A - A B A A A B A B A A B B A B B B B B B B A B A  
A B A B B A A B A A B B B A A A B A A A A - - -  
B B A B A B A B B A B B A B B A A A A A A B B A A  
B B A B A B A B B A B B A B B A B B A A A A B B A A  
- - - - - - - - - - - - - - - - - - B B B A B  
A A A A A B A A A B B B A B B B B B B B B B A B  
A B B B B B B A B A B B B A A B A A A A A A B B B  
A B A B B A B B B A A A B A A B A A A B B A B  
B B B A A A B B A A B A B B B A B B A B A A A A A  
B A A A B B A A B A B B A B B A B B A A A A A A B  
A A A A A B A A A A B B A B B A B B B B B B A A B  
B B A B B A B B B B A A B A A B B A A A A B B A A  
B B A B B A B B B B A A B A A B B A A A A A B A A  
B B A A A B A A A A B B A A B B B A A A A A A A B  
A - A B A B B A A B B B B B A A A A A A A A B B  
B B B B B A B A A B B B B B A B B B B B B B B B  
A A A A B A B B A B B B A B A B B A A A A A A B  
B B A A B B - B B B B A A B B B B B B - A A A  
- A A A A A A - A A B A A A - A B B A A A - A A  
A A B A A B A A A A B B B B - B B - B B B B A -  
A A B A A B A - A A B B B B B B - - - - - B A B  
B A A A B A A B B A A A B B A B A A A A A B B B  
B B B A A A B B A B B B A B B A B A A A A - - -  
B B A B A A A B A B B B B A A A B B B B B A A A  
B - - B A - - B B A B B B - A B B B B B A A A A  
B B A B A B B B B A - A B B B A B B B B A A A  
A B A B A A B B B B A A A A A B B A A A B - A A  
B B B B B A B A A B B B B B A B B B B B B B B B

A B B B B A B B A B A B A B B B A B B B B A A A  
A - B A B B B A B A B A A A A A B A A A A - B B  
A A B A B B A A B A B B B B A A A B B B A B A B  
A A B A A B A A A A B B B B B B B B B B B B A B  
B B B A A B A B B B B A A B A A B A B B B A A A A B  
A A A B A A B A B B A A B B A A B A B B A A A A B A  
B B - B A A B B A - B B B B B B B B B B A - A A  
B A A B A A A B A B B B - A A A A B B B A A B A  
A A A B B A B A B B B B B B B A B A A A B A A B  
A A A B A A B A B A B A B A B A B A A A B A B B  
A B A A A B B B B A A A A A A A B A A A A B A A A  
A A B A A B A A A A B B B B B B B B B B B B A B  
A A - A A B A A A A B B B A A A A A B A A A B A A A  
B B A B A B B A A B B B A A B B B A A A A A B B B  
A A A A B B B A B A B A B A B A B A B B B B B A  
A - A A B A A A A B A A A A B B A A A A B - A B  
A B B B B B B A B B B B B A A B A A A B B B B  
A - - A B B A B B A B B A B B A A B A A B B B A B  
B B B A A B A A B A A B A A B A A A A B B B B A A A

A B B B B B B B A B A A A A A B B A A B B B - A  
B - A B A A B A B A B B B B B B B A A A A A A B  
A - A A B - B A B A B B B A A A A B B B A A A B  
A A A B A A A B A B A B A A B B A B B B B B B A  
A A B B B A B A B B B - B B B A B A A A B A A B  
A - - B B A B A B B B B B B B A B A A A B A A B  
A A A A A A A A A A A B B B B A A A A A A B B B  
A A A A A B A B B A A B B B B A B B - B B B B B  
B A A A A B B B A A A A A B A A B B B B A A B  
B B A B A A B B B A B B B - A A A A A A B - A A  
A B B A A B A B B A A A A A B A B B A A A B A A B  
A B B B B B B A B B A A A A B A B B A A A B A A B  
B A - A A A A A A A A B A A B A B A B B B A B A  
A A A A B A A B B A A A B B A B A A - A A B B B  
B B - A A A B B A B A B A B A A A A A A B A A B  
A - A - - - A A - B - - A - A B B B B B A A -  
A B A A B B A B B B A B B B A B A A A B A B A  
- A A B B A A A B A B B B B A A A B B B - A B  
B B B A A A B B A B B B A B B A B A A A A A A A  
A A A A B A A B B A A A B B A B A A A A A B B  
B A A B A A B B A B B A B B A A A A A A A B A  
B - - A A B - A B A A B A A A A A B B B B A B A  
A B A B A A B B B B A A A A A A B B A A A B A A  
B A A A B A B B B B B A B A B A A A A A A A A B  
A - A B B B B B B A A A B B A B A A A A B A A B  
B B B A A B B B B A A A A A A A B A A A B A A A  
A - - B A A B B A A A B A B A A A A A A A A B B  
A - B A A B A A A A B B B B - B B B B B B B A B  
A A A B B A B A B A B B B A - A B B B A - A B  
B A A A B B B A A B B A B A A B B B B A A B A  
A B - B B A B A B B B B B A A A A A A B B A B  
A A A B B A B A B B B B B B B B A B A A A B A A  
B A B A B B A A B B B A B B A B A A A A B B B A  
A B A A A B B B B A A A A A A A A B A A A B A A  
A B A A A B B B B A A A A A A A A B A A A B A A  
A A A A A B B B B A A A A A A A A B A A A B A A  
A B A A A B B B B A A A A A A A A B A A A B A A

A - - A A B A A A B B B A B A B B A A A A - A A  
A B A B B B A B A A B B A B A A A A A A A B A B  
A A A B A A A B B B A A B B A B B B B B B A B A  
B B - B A A B B A A B B B B B B B B B B A A A A  
A A B A A B A A A A B B B B B B B B B B B - - -  
B - - A A B A B B B B B B B A A A A A A A A A B  
A A - A B A B B A A A A B B B B A A A A A B A A B  
B B B A A B A B B B B B B A A A A A A A A A A B  
B B B B A A A B A B B B B A B A B B B B A A B A  
A B A B A A A B A B B B A B A A B A A - A B A A  
B B B A B B B B A A A B B A A B B A A A A A B A  
B A B A B A A A A B B A A A B - B A A A B A A B  
A A - A B B A A B A B A A B B B A A A B B A B  
A - A B A A A B A B A B A A B B A A A A A B B A  
B - B B B B A B B B A B A A B A A A A A B B B B  
B A A A A B A A B B A B B B B A A A A A - A B  
A B B A B B B A B A B A A B A A B A A A A A B B  
A - A B A B A B A A B A A B A B A B B B B A B A  
A A - B A B A B A A B A A B A - - A B A B B B B A B A  
A - - - A A B B A B A A A A B B A B B B B A A B  
A - - A A B B B A B B B A A A B B A A A A A A B B  
A A A A B B - - B A A A A - A A - A A A A A B B  
A A A A A B A B A A B B A B B A B B A B B A A A B  
B A A A A A B B B B A A B - B A A A A A B A A A  
A A A B A A A B A B B A B B A B B B B B B A B A  
B B A B A B A A B A B B A A B B B B B B B A B B  
A B B A A B B B A B - B A A B B B A A A A B B B  
A A B A A A A B A A A A B A A B B B B A B A A B  
B A A A A B B B B A A B - B A A A A A B A A A  
- A A A A B - A A - B B A B B B B B B B B A B  
A A A B A A A B B B A A B B A B B B B B B - B A  
B A - A B A B B B B B A B A B A B - B B A A B  
B B A B B A B B B B A A B A A B A A A - - A A  
A A A B B B B A A A B B B B A A A B B B A A A B  
A - - A B B A B - A B B A A B A A B B B B A B  
A - - A B A B B B A A B A A B B B B B B A B B  
A B A B A A A B A - B - A A A A B A A A A B A A  
A A - B B B B B B B B B B B A A B A A A B - B B  
A - - B B B B B B B B B B B A A B A A A B - B B  
A - B A B B B A B A B A A B A A B A A A A B B B

B A A B A B B B B A B B B A A B B B B A B A A  
B - A B A A A B A - B B B A A A A B B B A A B A  
B - A B A A A B A B B B B A A A A B B - B B A A A  
B B A B A A A B A B B B A A B A A B B B A A A B A  
A A A A B A B B B A A B A A A A B B B A A A A B A  
B A B A B B B B B B A A B B A A B B B A A A A A A B  
A B B B B B B A A B B A A B A B B A A A A A B B A  
A B B B B B B A B A B B B A B B A A A A A B B B  
A - B A B A A B B B B A A B B A A B B A B B B A B A  
B B A B B A B B B B A A B A A B A A B B A - A B B A A  
A A A B B B B B B - - - - - - - - - - - - A A B  
B A A B B A A B A B A B B A A A A A A A A B A A A  
A - A A B B B A B A B B B A A A A B B B A A A B  
A - A A B B B A B A B B B A A A A B B B A A A B  
B B B B B A A A A A B B B A B B B - B B B B B  
B A A A A A B B B B A A B - B A A A A A B A A A  
B A B A A B A A B B A B B B B A A A B A A B A B A B  
B A B B A A B A A B B B A B A B B B - - B B B  
A A A B B A A A B A B A B A A A A A A A A A A B B  
B B A B B A A A B A B A B B A A A A A A A A B B B  
A B B B B A A A B A B B B A A A A A A A A A B B B  
A A A B B A A A B A B B B A A A A A A A A A A B B  
A - - B B A A A B A B B B A A A A A A - A - B B  
A A A B B A A A B A B B B A A A A A A A A A A B B  
A B B A B B B B A B A B A B A B A A A A B A B A  
A - - A B B B B A B A B A B A - A B A A A - B A B A  
A B A B B A B B B A B B B A B B B A A A A A A A A B  
A - A A A B A A A B B B A B B A B A B B A A A A A A  
- B B B B A A B A B B B A B A A A A A A A A - - B  
B B B B A A A B A B A A B B A A B A A A B - B B  
A B B A B B B A B - B A - B B B B B B B B A B B  
B B A B A B A A A B B B A B B A B B A A A A A A A B  
A B A B A A A A B B A A A A A B A A A A A B A A  
B B A B A B A A A A B B A A A B B B B B B B B B B  
- A B A B A A A A A A A B B - B A A A A A B B A  
B B - B A B B B B A B B A A A A A B B B B - B A  
B - - A A B A A B A A B A A B A A A A B B B B A B A  
B A - A A B A A B A A B A A B A A A A B B B B A B A  
B B - B A A A A A B A B A A B A A B B - B A B B



B B B B A A A A A B A B A B B A A B B B B A B B  
B B A B B A A B A A A A A A A A A A A A A A B A B A  
B B - B A B A A B A A A B A A A B A A B A B B - A - A A  
B B A B B A A A A A A A A A A A B A A A A A - B B B A  
- B B B B A A A B A B - B B B A B A A A A B A A B  
A B B B B A A A B A B B B B B B A B A A A B A A B  
A - - B B A B A B B B B B B B B A B A - A B A A B  
A - - A B A B A B B B B B B B B A B A A A B - A B  
B B A B B B A A A A A A A A B A A B B B B A B A  
A A A A B A A A A A A A A A A B A A B B B B A B A  
A B - B B B B A B B B B B A A A A A A A B B A B  
B A B A A B A A A A A - A A B A A B B B B B B A  
B B A B B B B B B B B B B A A A A B B A B A A B  
A B A B A A A A A B A B A A A A B B B B A A A B  
B B - B A A B B A - B B B B B B B B B A A A A  
A A A B B A A A B A B B A A B A A B - B A B B B  
A - B B B A A A B A B B A A A A A B B B A B B B  
A A A A B B B A B A B B B B B A A B B B B B A B  
B A - A B B A A B A B A B B A A A A B B B A B A B  
B - - A B B A A B A B B A A A A A A B B B A A A A  
A B B B A B A A B A A A B A A B A B B B A A A A  
B B B A A B A B B B B B A A A A A A A A A A A B  
B B B B A B A A B A A A B A A A B A B B B A - A A  
B B - B A B A A B A A A B A A A - A B B - A A A A  
A A A B A A B A B A B A B A B A B A A A B A B B  
A - A B A A B A B A B A B A B A B A A A B A B B  
B B B A A B A B B B B B A A A A A A A A A A A B  
B B - B A B A A B A A B B B A B B B B A A A B A A B  
B B B A B - B B A B B B A B A A B A A A A A A A  
A B B B A A B A A B B B A B B A B B B B B - B B  
B - B A A - B B A B B B A B B A B A A A A A A A  
A A A A B B A B B A A A B B A B A A A A A A B B  
A A A A B A A B B A A A B B A B A A A A A - B B  
A A A - B A A B B A - - B B A B A A A A A - B B

A - A B B A - B B A A A B B A B A A A - B - A B  
A A A B B B B B A A A B B A B A A A A B A A B  
B B B B A A B A B B A A A A B A B A A A B A A A  
B B A A A A A B A B B B A B A A B A A A A A A A  
A A A B B B B A B B B B A B B A A B A B A A A A  
A - A A B A B B B A B B A A B A B A A A A - B A  
A - A A B A B B B A B B A A B A B A A A A - B A  
A B B A B A B B B A A B A A B B B B B B B A B B  
A - - A B A B B B A A B A A B A A B B B B B B A B B  
A B B A B A B B B A A B A A B A A B B B B B A B B  
B A A A A A B B B A B A B A B B A B B B B B A B  
A B B A A B B B B A B A A B A A B A A A A B B B  
B - - - B A A A B B B B A A A A B B B B B B A A  
B - A - B A A A B B B B A A A A B B B B B - A A  
B - A - B A A A B - B A A B B A B B B B B B B A  
A A A B A A A B - B A A B B A B B B B B B B A  
- - - A - - B B - - B A B A A A B A - A B A B A  
B - - A B A A B B A A A A A A A B B A A A A - A B  
B A A A A B A B B B B B B A A B A A A A A - - B  
B - B A B B B A A A B B A - B A A A A A A - B A  
A - A B A A A B A B A A B B A B B B B B B - B A  
B B B B B A B A A B B B B B A B B B B B B B B  
B B B B B A B A B A B A B B B B A A A A A B A A  
A - A B A A A B A B B A B B A B B B B B B A B A  
A B A B A A A B A B B A B B A B B B B B B A B A  
B B A B A A B B A B B A B B A B A B B B B - - A  
A A A B A A A - A B B A B B B B A B B B B A B A  
- A A B A A A A A B B A B B A B A B B B B A B A  
B B A B A B B A A B B B A B B A B A A A A A A B  
A A B A B A A B B A A A A A A A B A B B B - A B  
B B B A A A A B B A A B B A A A A A A A B - - -  
A A A B B B B A B B B B A A B A A A B A A A B  
A - - B B B B B A B B B B A A B A A A A A B B  
- A A B B B B B A B B B A B A B B B B A A A B B  
B - - B A A B A A B B B A B B B A B A B B B B A - A B  
A A A B A B B A A B B B A B A A B A A A B B A B  
A - - B B B B A A A B B B B A A A B B B A - B B  
A - - B B B B A A A B B B B A A A B B B A A A B  
B B A B B B A A A B B B B A A A A B B B B A A B  
B B - B A B A A A B B B B A A A A B B B B A A B

B B - B B A B B A B A A B B B B B B B B B - A A  
B B - B B A B A A A B B B A B B B B B B B B B B B  
- A A B A A B B A A A A B A B B B B - B A A A B  
A - B B A B A A A B B A A B B A A B B B B B B B B A  
A - A B A A B A B A B A B A B A B A A A B A B B  
A A A B A A B A B A B A B A B A A A B A B B  
A B A B A A B B A B A A A A B A B B B - A B B A  
B A B A B B A A B A B B B B A B A B B B A B B A  
A B - B A A B B A B A A A A B A B B B B A - B A  
A B - B A A A B A A B B B B B B A B B B B A A B A  
A B A B A A A B A A B B B B B B B B B A A B A  
A B A B A A A B A A B B B B B B B - A A A A A B A  
B A A B B A A A A B B A A - B B A A - A A A A A B B A B  
A B B B B - B B A B A B A B B A B B B A A A  
A B B B B A B B A B A B - B B B A B B B B - A A  
A B B B B A B B A B A B A B B A B B B B A A A  
B A A A A A B A B B B B A B A A A B B B B A A B  
B A A A B A B A B B B B A B A A A A A B A A B  
B A A A A A B A B B B B A B A A A A A B A A A  
A A B B A A A A A A B B A A B A A A A A A A B  
A A A A A B B A B B B - A B B A B B B B A A B  
A A A B A A B B A B B B A A B B A B B B B - A B  
A A A B A A B B A B B B A A B B A B B B B A A B  
A - - B A A A B A B A A A B B A B B B B A A B  
B B A B A A B B A B B B - A A A B A A A A A B A  
B A A B A A A A A B B B - A A B B A A A A A B A  
B A A B A A B B A B B B A A A B A A A A A B A  
B A A B A A A B A B B B A A B A B B B B A - B A  
A A A B A B B B B A B B B A A B B B B B A - A A  
- - B B A A A B A B - B B A B A B B B B A A B A  
- A A A A A - B B A B A B B A B B B B B A A B

B B B B B A B A B A B A B B A B A A A A - A A A  
B - - B B A B A B A B A B B B B B B A A A A - A A  
B - A B A A B A B A B B B B B B B A A A A - A B  
B B A B A A B A B A B B B B B B B A A A A A A B  
- B B B A A B A B A B B B B B B B A A A A A A B  
B B A B B A A B B B B A A B A B A A A A A A A A  
B A A A A A B B B B A A B A B A A A A A A A A A  
- B B B A B - A B B A B B A B A A B B B A A A A  
B B B B B B A A B B A B B A B A A B B B A B B B  
- - - - - - - A B B B B B B B B B A A A A A A B  
B A A A A B A A B B A - B B B B A A A A A A A A B  
A - - B A A B B B B B B A - B B A A A A B - A B  
A B B B A A B B B B B B A B B B A A A A B B A B  
B A A A B B A A A B A B B B B A A A A A A B B B  
A A A A A B A B B A A A A A A B B B A A A B A  
A - B A B B - B B A B B A - B A A B B B B B B B  
A - - A B B A B B A B B A A B A A B B B B A A B  
A - A A A B A A A B B B A B B B B B B B B A B  
A A A A A B A A A A B B A B B A B B B B B B A B  
- B B B B A A B B B A B A A B A B B B B B - B B  
B A B B B B A B - B A B A A B A B B B B B - B B  
B - B B B B A B B B A B A A B A B B B B B B B  
B - B B B B A B B B A B A A B A B B B B B B A B  
B A B B B B A B B B A B A A B A B B B B B A B  
A A B A A B A A A A B B B B B B B B B B B A B  
A A B A A B A A A A B B A B B A A B B B B A A B  
A A - B B A B B B A B B A B B A A B B B B A A B  
A A - - - - - - - - - - - - - - - - - A A B  
A B A B B A B - B B A A A B A A B A A A B A A B  
A A B A A B A B B B B B A A - A A B B B B - A B  
A B B B B B B A B B B A B B B A A A A A B B A A  
A B B B B B A B B B A B B B A A A A A B B A A  
A B A B B B - A B B B A B B B A A B B B B A A A  
A - A A B B A A B B A A B B B A A B B B A A A  
- A - A B A A B A A A A A B A B B A A A B A B A  
A B B A A B B B A B A A B A A B A A A A B B B

A B A A B B A B B B A A B B B A A B B B B A A A  
A A A A A B A B B A A B B B B A B B B B B A B B  
A - A A A B A B B A A B B B B A B B B B B - B B  
A A A A B A A B B B B B B B A A B B B B A B A  
A - A A B A A B A B B B B B B A A B B B B A B A  
B A A A B A A A A B B B A A A A A B - B B - B B B B  
- - A B B A A A B B A A A A A B - B B - B B B B  
B A B A B A A A B B B B B B A A A B B B A B B A  
- A A A A B A A B A A A A A B B B - B B B B A B A  
B B B A B B B B B B A A A B B B A B B B A A A A - B A  
B - B A B B B B A A A B B A A A B B A A A A A B A  
B B B A B B B A B A A A B B A A B B A A A A A B A  
A B - B A B B B A B A A B A A A B A B B A A A B  
A B B A A B A B B A B A A A B B A A A A A A A B A  
A B B A A B A B B A B A A A B B A A B B A A A A B  
A B B A A B A B B A - B A A B B A B B - A - A B  
B B A A A A B B A B A B A B A A A A A A A B A A B  
A B B A B A A B B A B B A A A B A B B B A A B B  
A - B A B A A B B A B B A B B A A A B A - B B A - B B  
- A A A A B A A B B B - A A A B B B B B A B B A  
B B B B B A A A B B B A B B A B A A A A A B A B A  
B A A B B B A A B B B B - - - B A A A A A B B B A  
B B A B B B A A B B B B B B A B A A A A A B A A A  
B - A B B B A A B B B - B B B - A A A A B - B A  
A - A B - B A A B B B B B B B B A A A A B - B A  
- - B B A A A B A B - B A A A A - A A A B A A A  
B B A A A A A B A B B B A B A A A A A A A A A A  
B B A B A A A B A B B B B A A A B B B B B A A A  
- B A B A A A B A B B B B A A A B B B B A A A  
B B A A A A A B A B A B B B A A B A A B B - - -  
B - B A B A A B B A A A A A A B B A A A A B A B  
B A A B A A B A B A B B B B B B A A A A A A A A  
A A A B A A B A B A B A B A B A B A A A A - B B  
A A B A B B A A B A B A B B B B A A A B B B A B A B  
B - A B A A B B A B B B - A A A B A A - A A B A  
B A A A A B A A B B B A B A A B - B B B A B B A

|   |   |   |   |   |   |   |   |   |   |   |   |   |   |   |   |   |   |   |   |   |   |   |   |   |
|---|---|---|---|---|---|---|---|---|---|---|---|---|---|---|---|---|---|---|---|---|---|---|---|---|
| B | B | A | B | A | B | B | B | B | B | B | B | B | B | A | B | B | A | A | A | A | A | B | B | B |
| A | A | - | A | A | B | A | A | A | A | B | B | B | B | B | B | B | B | B | B | B | B | B | B | B |
| - | A | A | B | B | A | A | A | B | A | - | A | - | A | A | A | - | - | A | - | A | - | B | B |   |
| A | B | A | B | B | A | A | A | B | - | B | B | B | B | A | B | A | A | A | - | - | A | B | B |   |
| B | B | B | B | A | B | A | B | A | A | A | A | A | A | B | B | B | A | A | A | B | A | B | A |   |
| B | B | A | B | B | A | A | A | B | B | A | A | B | B | B | B | B | A | A | A | B | A | A |   |   |
| - | B | B | B | B | A | A | A | B | B | B | B | - | B | B | B | B | B | B | B | B | - | A | A |   |
| A | B | A | A | B | A | A | B | B | B | B | - | B | B | B | B | B | B | A | A | B | A | A |   |   |
| B | B | B | B | A | A | A | - | A | A | A | A | A | A | - | A | A | A | B | B | A | A | A |   |   |
| A | B | A | B | A | A | A | B | A | B | B | A | B | B | A | B | B | B | B | B | B | A | B | A |   |
| A | B | - | B | B | B | A | A | B | B | B | B | - | B | B | B | A | A | A | A | A | - | A | A |   |
| A | B | B | A | B | B | B | A | B | A | B | A | A | B | A | A | B | - | A | A | A | B | B | B |   |
| B | A | A | A | B | A | A | A | A | A | A | B | - | - | - | - | - | - | - | - | - | A | B | A |   |
| A | B | A | A | A | B | B | A | A | A | A | A | B | B | A | B | A | A | A | A | A | A | A | A |   |
| A | B | B | A | A | B | B | B | A | B | B | B | A | B | B | B | B | A | A | A | A | B | B | B |   |
| A | B | B | B | A | A | B | B | A | B | A | B | B | B | B | B | A | B | B | B | A | A | A | B |   |
| A | A | B | A | A | A | A | B | B | A | A | A | B | B | A | B | B | A | A | A | B | B | A | B |   |
| - | A | A | A | - | A | A | - | - | A | A | A | A | - | A | B | B | A | A | A | B | A | A | B |   |
| A | A | A | B | A | A | B | B | B | A | A | B | A | A | A | A | A | A | B | B | B | B | B | - |   |
| A | B | B | A | A | B | B | B | A | B | A | B | A | A | A | B | B | A | A | B | A | A | B | A |   |
| A | B | B | A | A | B | B | B | A | B | A | B | A | A | A | A | A | A | A | A | A | A | A | A |   |
| A | A | A | A | A | A | A | A | A | A | A | A | A | A | A | A | A | A | A | A | A | A | A | A |   |
| A | A | B | A | A | B | A | A | A | A | B | B | B | B | B | B | B | B | B | B | B | B | B | B |   |
| A | B | A | B | A | A | A | B | A | B | B | A | A | A | A | A | B | A | A | A | A | B | A | A |   |
| B | A | A | A | A | A | A | B | A | B | A | A | A | A | A | A | A | A | A | A | A | A | A | A |   |
| B | B | A | B | B | A | A | B | A | A | A | A | A | B | A | B | B | A | A | A | A | - | - | A |   |
| A | A | B | A | A | B | B | A | A | A | B | B | B | B | B | B | B | B | B | B | B | A | B | B |   |
| B | B | A | B | A | B | B | B | B | A | A | B | A | A | A | A | A | B | B | B | B | A | B | A |   |
| B | B | B | A | A | A | B | B | A | B | B | B | A | B | B | A | B | B | A | A | A | B | A | B |   |
| - | - | - | - | - | - | - | - | - | - | - | - | - | - | - | - | - | - | - | - | - | - | - | A |   |
| B | B | A | B | A | A | A | A | B | B | A | B | A | A | A | A | - | B | B | A | B | A | B | B |   |
| A | A | B | A | A | A | B | A | A | B | B | B | A | B | B | A | B | B | A | A | - | - | A | A |   |
| - | - | A | A | B | B | - | - | B | B | A | A | - | A | A | B | - | A | A | - | A | A | - | A |   |
| B | A | A | A | A | B | A | B | B | B | B | B | A | B | B | B | B | A | A | A | B | - | A | B |   |
| A | A | B | A | A | B | A | A | A | A | B | B | B | B | B | B | B | B | B | A | A | B | A | B |   |
| A | A | B | - | B | A | A | B | A | A | A | A | - | B | A | B | B | A | A | A | B | A | A | A |   |
| A | B | B | B | B | B | B | A | A | B | A | A | A | B | A | B | B | - | A | - | - | - | B | A |   |
| A | B | - | B | A | A | A | B | B | A | A | A | B | B | A | A | - | A | A | A | B | - | - | - |   |
| B | B | A | B | B | A | B | B | A | B | A | A | B | B | B | B | B | B | B | B | B | B | B | B |   |
| A | A | B | A | - | B | A | A | A | A | B | B | B | B | B | B | B | B | - | B | B | A | B | B |   |

|   |   |   |   |   |   |   |   |   |   |   |   |   |   |   |   |   |   |   |   |   |   |   |   |   |
|---|---|---|---|---|---|---|---|---|---|---|---|---|---|---|---|---|---|---|---|---|---|---|---|---|
| A | A | A | A | B | A | A | A | A | B | B | A | B | A | B | B | B | B | A | A | A | B | - | B |   |
| - | B | A | B | A | A | B | A | B | A | B | A | - | A | B | A | A | A | A | A | A | B | - | - | - |
| - | A | B | A | A | B | A | A | A | A | B | B | - | B | B | B | B | B | B | B | B | B | A | A | B |
| A | A | B | A | A | B | A | A | A | A | B | B | B | B | B | B | B | B | B | B | B | B | B | B | B |
| A | A | - | B | A | - | B | A | A | A | A | B | - | B | B | B | B | B | B | B | - | - | B | A | B |
| A | A | B | A | A | B | A | A | A | A | B | B | B | B | B | B | B | B | B | B | B | B | - | - | - |
| B | A | A | A | A | B | A | - | B | B | B | B | B | A | A | A | A | A | A | A | A | A | A | A | B |
| B | B | A | B | B | A | A | B | A | A | B | A | B | A | B | A | A | A | A | A | A | B | A | B | A |
| - | - | A | - | - | - | - | - | - | - | - | - | - | - | - | - | - | - | - | - | - | - | A | B | A |
| B | A | A | A | B | A | A | A | A | A | A | A | A | A | B | A | A | B | B | B | B | B | - | B | A |
| A | B | B | A | A | A | A | A | A | A | A | - | B | A | B | A | B | A | A | B | A | - | - | - | - |
| A | A | A | A | B | A | A | A | A | A | A | A | A | B | A | A | A | B | A | A | - | - | - | - | - |
| B | A | A | A | B | A | A | A | A | A | A | A | A | A | B | A | A | B | B | B | B | A | B | A | A |
| A | A | A | B | A | A | A | B | A | B | B | A | A | B | A | - | A | B | B | B | B | A | - | - | - |
| A | A | B | A | B | A | A | A | B | A | A | A | A | B | A | A | A | B | B | - | - | - | - | - | - |
| B | B | A | A | B | B | B | A | A | B | B | B | A | B | A | A | A | B | B | B | A | A | B | B | B |

| 92 | 93 | 94 | 95 | 96 | 97 | 98 | 99 | ## | ## | ## | ## | ## | ## | ## | ## | ## | ## | ## | ## | ## | ## | ## |   |   |   |
|----|----|----|----|----|----|----|----|----|----|----|----|----|----|----|----|----|----|----|----|----|----|----|---|---|---|
| B  | B  | A  | A  | B  | B  | A  | B  | B  | B  | A  | A  | A  | A  | B  | B  | A  | A  | A  | B  | B  | A  | A  | A |   |   |
| A  | A  | B  | B  | B  | B  | B  | A  | B  | A  | A  | B  | A  | B  | B  | B  | A  | B  | A  | B  | B  | B  | B  | B |   |   |
| B  | A  | A  | A  | A  | B  | B  | B  | B  | A  | A  | A  | B  | B  | B  | B  | A  | A  | B  | A  | A  | B  | A  | A |   |   |
| A  | A  | B  | B  | A  | B  | A  | A  | A  | B  | B  | A  | B  | B  | A  | B  | A  | A  | B  | B  | B  | B  | A  | A |   |   |
| B  | B  | A  | A  | A  | A  | A  | B  | A  | B  | A  | B  | A  | B  | A  | A  | B  | B  | A  | A  | A  | A  | A  | A |   |   |
| A  | A  | A  | B  | A  | A  | A  | B  | B  | A  | B  | A  | A  | -  | A  | A  | A  | B  | B  | A  | A  | -  | A  | A |   |   |
| A  | B  | B  | B  | B  | A  | A  | B  | B  | B  | B  | A  | B  | A  | A  | B  | A  | A  | B  | -  | A  | B  | B  | B |   |   |
| A  | A  | A  | A  | B  | B  | B  | A  | A  | A  | B  | B  | A  | B  | B  | A  | B  | B  | B  | A  | A  | B  | A  | A |   |   |
| B  | B  | A  | A  | B  | A  | A  | B  | A  | B  | -  | B  | A  | B  | A  | A  | B  | B  | B  | -  | B  | A  | A  | A |   |   |
| B  | A  | B  | A  | B  | B  | B  | A  | A  | A  | A  | A  | A  | A  | B  | A  | A  | B  | A  | -  | B  | A  | B  | B |   |   |
| B  | B  | B  | A  | A  | B  | A  | B  | B  | B  | B  | B  | B  | A  | B  | A  | A  | B  | A  | B  | B  | B  | B  | B |   |   |
| A  | A  | B  | A  | A  | B  | A  | B  | A  | B  | B  | B  | B  | A  | B  | A  | B  | A  | A  | A  | A  | A  | B  | A | A |   |
| B  | A  | A  | A  | A  | B  | A  | A  | B  | B  | B  | B  | B  | A  | A  | A  | B  | A  | B  | B  | -  | A  | A  | A | A |   |
| B  | B  | A  | A  | A  | B  | B  | B  | A  | A  | B  | B  | B  | A  | B  | A  | A  | B  | A  | A  | A  | B  | A  | A | A |   |
| B  | A  | B  | B  | A  | A  | A  | A  | B  | A  | A  | A  | A  | B  | A  | A  | A  | B  | B  | B  | B  | B  | B  | B | B |   |
| A  | B  | A  | A  | -  | B  | A  | B  | B  | B  | A  | B  | A  | B  | A  | A  | B  | B  | B  | B  | A  | B  | A  | A | A |   |
| B  | B  | A  | B  | A  | A  | A  | B  | A  | B  | B  | B  | A  | B  | B  | B  | B  | B  | B  | A  | B  | B  | B  | B | B |   |
| A  | B  | A  | B  | B  | A  | A  | B  | A  | B  | A  | B  | B  | A  | B  | A  | A  | B  | A  | A  | A  | A  | A  | B | B |   |
| B  | A  | A  | B  | -  | B  | B  | A  | A  | A  | A  | B  | A  | B  | B  | B  | A  | A  | A  | B  | B  | A  | B  | B |   |   |
| B  | B  | A  | B  | A  | B  | A  | B  | -  | B  | B  | B  | A  | A  | B  | B  | A  | B  | B  | B  | A  | A  | A  | A | A |   |
| A  | A  | A  | B  | B  | B  | B  | A  | A  | B  | A  | A  | B  | B  | A  | B  | A  | B  | B  | B  | B  | B  | A  | B | B |   |
| A  | B  | A  | B  | A  | B  | B  | A  | B  | A  | A  | A  | A  | B  | B  | A  | A  | A  | B  | -  | B  | B  | A  | A | A |   |
| B  | B  | A  | A  | B  | A  | A  | A  | A  | B  | A  | A  | A  | B  | A  | A  | A  | A  | A  | B  | B  | A  | A  | A | A |   |
| B  | A  | A  | A  | A  | B  | B  | B  | B  | A  | A  | B  | A  | B  | B  | B  | A  | A  | B  | A  | A  | B  | A  | A | A |   |
| B  | B  | B  | A  | A  | B  | A  | B  | B  | B  | A  | B  | A  | B  | A  | B  | B  | B  | A  | B  | B  | B  | B  | A | A | A |
| B  | A  | B  | A  | A  | B  | A  | -  | A  | A  | A  | A  | B  | B  | A  | B  | B  | B  | A  | A  | A  | A  | A  | A | A | A |
| -  | -  | -  | -  | -  | -  | -  | -  | -  | -  | -  | -  | -  | -  | -  | -  | -  | -  | -  | -  | -  | -  | A  | B | A | A |
| B  | B  | A  | A  | B  | A  | A  | B  | A  | B  | B  | A  | -  | B  | A  | B  | A  | A  | B  | -  | A  | B  | B  | B | B |   |
| A  | B  | -  | B  | B  | A  | A  | B  | A  | B  | A  | B  | B  | B  | B  | A  | -  | B  | B  | B  | B  | A  | A  | A | A |   |
| A  | A  | B  | B  | A  | A  | A  | A  | B  | B  | A  | A  | A  | A  | B  | A  | B  | B  | B  | A  | A  | B  | A  | A | A |   |
| B  | B  | A  | A  | B  | A  | A  | A  | A  | A  | A  | A  | A  | B  | A  | A  | A  | A  | A  | B  | -  | A  | A  | A | A |   |
| B  | B  | B  | B  | B  | A  | A  | B  | B  | B  | B  | B  | A  | A  | B  | A  | B  | B  | A  | A  | -  | A  | B  | A | A |   |
| B  | A  | B  | B  | A  | A  | B  | A  | B  | B  | B  | B  | B  | B  | B  | A  | A  | B  | B  | -  | B  | B  | A  | A | A |   |
| A  | A  | A  | B  | B  | B  | B  | A  | A  | B  | A  | A  | B  | B  | A  | B  | A  | B  | B  | -  | B  | A  | B  | B | B |   |



A A B B A B A B A A B B A A A A B B A - A A B B  
B B B A A A A B A A B B A B A A B A B - B A B B  
B B A A A A A - - B A B A B A A B B B - B A A A  
B B A B A B A B B B B B B B A A A A B B B B B B  
A A A B B B B A A A B A A B B A B A B - A B A A  
A A B B B B B B A A A A A B B A A A B - B A A A  
A B A A B B B B A A B B B B B B B B B B - A B A A  
A B A B A B A A A A B A A A A A B A A B B A A A  
B A A B B A - B A B A B A A B A A A A A A A A B B  
B B B B A A A A A A A B A A A B A A A A - B B B B  
B A A B B B B B B A A A B A A A B A A A A A A A B B  
A B B B A A A B B B B A A A B A A A A A A A A A A B B  
A B A A B B A A A B B A A B A A A B B B A A B A A A A  
A A B B B B A A A B B A A A B A A A A A A A A A A A  
B A A B B B B B A A A B A A A B B B A A A B B B B B  
A A A B A A A A B A A A A A A A A A A A A A B B A A A  
B B B A A B B B B B B A A A B - A B B A B A A B B B A A  
B B A B B A B B A B A B A A A B A B B B A A A A A A  
A A A B A A B A A B A B A B B A A A A A A A B B B  
B A A B B B B A A A A B A B B B A A A B B - B B  
B B A A A A A A A A B A B A A A A B B A A A A A A  
A A B A A A B B A A B A B B B B A B A A A A A A A

A B A B A B A B A B A A A B A A A A B - A B B B  
A B A A B A B B B A B A B A A B A B A A A B B B  
A B B A A B A A B B A B A A A A B A A - A B A A  
B A A A B A B B B A B A B A A B A A A A A B B B  
B B B B B A A B B B B B A B A B A B A B B - B A B B  
B B A B A A A B A B B B A B A B B A A - A B B B  
A A B B B A A B A B A A A B - B A B B A A - - -  
A A B B B B B B B A A A B B B A A B B B B A A A  
A A B A B A B B A B B A B B A A A B A B B B B B A A  
B B A B A A A B B A B A B B A A B A A B B A A A A A  
B B A A B B B B B A A A B A A A B A B B B A B A A A  
A A B B A B A B A B A B A A B A A B A B B A A A A A  
A A B A A A B B A B B A B B A A A B A B B B B A A  
A B A A B A A A A B A B A A - B B A B B A A A B B  
A A B B B B A A A B B A A B B A A B A A A A A A A  
B B B A A A A B A A B A A B B A B A A B B B A B B  
B A A B B B A A B A A B B A A B B A A B B A B B A B B  
B B B A A A A B A A B A A B B A A B B A B B A B B  
A A B A B A B A A A B A A A A A A A B B B A A A B B  
A B A B A A B B A B B A B B A A A A B A B A A A B A A  
A A A A A B A A A B A A A A A B A B B A A A A B B B  
B A B A B A B A A A A A A B A B A A A A A A B A B B  
B A A B B B A A B A A B B A A B B A A B B B A B B - B B  
B A A B B B A A B A A B B A A B B A A B B B A B B A B B  
B A A B B B A A B A A A A B A A B B A A B B B A B B A B B  
A A B B A B B A A A A B A B B A A A A B A A A A A A  
- - - - - - - - - - - - - - - - - - - - - - - - -  
A B A B A B A A A B A B A A A A B A A B B A A A A  
B A B A B B B B B A A B A A B B A A A A A A A A A  
B A B A A B A B A A A A A B A A B B B A A A A A A  
B B A B A - B B A A A A A B B A A B B B A A A A A  
B B B A A B A B B B B B A B A A B A B B B B A A  
A B A B A B A A A B A B A A A A B A A B B A A A  
B A B A A B A B A A A A B A A B B B A A A A A A  
A B A B A A B B A B B A A A A B A B A A A B B A  
B B B A B A A B A B B B A B A A B B B A A A A A A

B A A B B A A A B A A B B A A B B B A B B A B B  
- - - - - - - - - - - - - - - - - - - - - - - - -  
A B B B B A A B A B A B B B A B A B B A A A A A A  
B A B A A A A A A A B B B A B A B B A A A - - - -  
B A A B B B B A A A A B A B A B B A A A B B B B B  
A B B A A B A A A A B A B A B A B A A B B A A B B A A  
A B A A B B B B A A B B A A B B A B B - A B A A  
B B A A B B A B B B B A A B A B A A A - B A A A  
B B B A A A A B A B A B A B A A B B A A - B A B B  
A A A B A A A B B A A B A A B B B A B - A A A A  
A B A A A B A B B B A B A B A A B B B - A B A A  
B B A A B B A A A B B A A A A A B B A A A - B A A A  
A B B B A A A B A A B A A A A A B A A - B B B B  
B A A B B A A A A B A A B A A B B A A - B A B B  
A B A A B A A A A B A A B A A A B A A - A A A A  
- B A B A B A A A B A B A A A A B A A - B A A A  
A B A A B B B B B B A B A B A A B B A B B B B B  
A A B A A B A B B A A B A A A B A B B A A A A A  
- B A B A B A A A B A B A A A A B A A - B - A A  
B A B B B B B A A A B A B B B B A A - B B B B  
A A B A B A A A A B B A A A A B B A A A A A A

A A B B A B B A A A A B A B B A A A B A A A A A  
B A A A A A B B A B A B A A A B B A A A A A A A A  
B B A A B B A B B B A A B A B B A A A B B A A A A  
A A A A B A A A A A B A A A A B B A A A A B B  
A - B A B A A B A A B A A A B A B A B A B B A A A  
B B A A B B A B B B A A A A B B A A A B B A A A  
A A A A B A B A B B A B A B B A A A A A A A B B B  
B A B A B B B B B B A A A B B A A B A - B A A A  
B B A A A A A B A B A B A B A A B B A A A A A A  
B A B A A A A A A A B B B A A B B A B A A A A A A  
A A A B A A A A B A A B A A B A A A A B A B A A  
A A A B A A B B A A A A A A A A A A A A A A A A  
B A B A B B A B B B A A A B B A A B A A A A A A A  
B A B A A A B B B B A A B A A B A A - A A B -  
A A A B A A A A B A A B A A B B A A A A B A B A A  
A A A B B B B A A A A A A A A A B A B B B B B B B  
A A B B A B A A A B B A A B B A B A A B B B B A A  
B A B A B B A B A A A B B A A A B B B A A A A A A  
A A A B A A A A A A A B A A A A A B B A A A A B B  
A A B A B A A A A B B A A B A B A B B B A A A A A  
A B B A A A A B B A A A A A A A B A B A A A A A A  
B B B A B B A B A A A A A A A A A B A B A A A A A  
A A B A B A A A A B A B A A B A B B B A A A A A A  
A A A B A A A A B B A B B B A A A B A B A A A B B  
B A B B A A A A B A A B B A A A B A B - B A B B  
B B B B A A A B B B B B A B A B A A A A B B B  
A A A B A A B B A B B B A A A B A B A A A B B B  
A A A A B B B A A A A B B A B B A B B B - A B A A



A A A A A A B A B A A B A B B B A A A A A B B B  
B B A - B B A B B B A A B A B B A A A B B A A A  
B A B B A B A B B A A A A B A A B A B A A A B B  
B A A B A B B A A A A B A B A A B B A A A B B B B  
B B B A A B A B A B A B A B A B B B A B B B A A  
A A B B A B B B A A A A A A B B A A A B B B A A A  
B B A A A A B A B A B B A A B A B B B B B A A A  
A B A A B B B B A A A B B A A A B B B B B A A B A A  
B A A A B A A A B A A B A A A B A B B A A B B B  
A - A B A A B B A B B A A A A B A B A A A B B B  
A A B B B B B B A A A A A B B A A A B B B A A A  
B A A B A - B A - A A B A B B B A A A B B B B B  
B A A B A B B A A A A B A B B B A A A - B B B B  
A B A B A A B B A B B A A A A B A B A A A B B A A  
A - B A B B B B A B A A A B B A A A - B B A A  
A A B B B B A B A A A A B A A A B B A A B A A A  
B B A A B A A A A A B A B A B A B B A A B A A A  
B A A B A B A A B A B B A A A B B B B A A A A A  
A A B A B A A B A B B A A A B B B B B - B B A A  
A A B A B A A B A B B A A A B A A A B B B B A A A  
B A B A - - A B B A B A B A B A B A B A B A - A A -  
B B A B A A B B A A A B A A B A A A A - A B A A  
A A B B - B A A A B B A A B A B A A B A A A A A  
B A A B A A A A B A A A A B A B A A A A A B B  
A B A - B B B A A A A A B B A B B B - A B B B  
A A B B A B A B B A A B A A A B A B B A A A A

B A B B B B B B A A A A B A B A A A B B B B A A  
A B B A A A A A B A A B A A A A A A B A A - B B  
A A A A A A A A B B A A A A B B A B A B B A B B  
A A B A B A B B A B B A B B A A A B A B B B B B A A  
- A A B B A A - - A A B A A A - - B B A B A B -  
B A A B - A A A B A A A B A A A B A B B A B A B B  
B A B B B B A A A B B B A A B A B B A B B A A A  
A A A B A A A A B A A B B A B A A A A A B B B A A  
A A A A A A B B A A B A A A A B A B B A A B A A  
B B A A A A A B A B B A B B A A A B A B A A A A A  
A B B A B A A B B A B A B A A A B B B A B - A B A A  
A B A B B A A B A A B A B A B B A B A B B B A B B  
B A A B B B A A B A A B A A B B A A B B B A B B A B B  
A B A A A B A A A A A A A A A A A A B B A A A A A  
A B B A A A B B A A A B B B B A A B - B A A A  
A A B A A B B B A B B A B B B B A B A A A A B A A  
A A A A A B B B A B A A A B A B A B A A A A B B B  
- B A A B - A A A B - - A - B B A - A B B A B B  
A B B B A A A B A A B A A A A A A B A A B B B B B  
B A B A A A A A A A B B B A B A B B A A A A A A A  
B B A A B A A A A A B A B A A A A A B B - A A A A  
A A B A A B B B A B B A B B B B A A A A - A B A A  
A B A A B B B B A A A A A B B B B A B B - B B B B  
A A B A A B A B B A A B A A B A A A B A B B - A A A A  
B A A A A A A B B A B A A A A A B A A A - A B B B  
B B B A A A A B B B B B A B B B A B A B B B A B B  
A A B A A B A B A B A B A B A A A A A A A A A B A A  
A A A B A A B B A B B A B B A A A A B A B A A A B B B  
B A B B B B A A A A B B B A A B A B B A A A A A A A  
B A A B B B B A A A A A B A B B B A A A A B B B B B  
A A B B - B A A A B B A A B A B A A B A A A A A A  
B A B A B A A B A A A A B A B B B A B B A A B B B  
B A A B B B A A B A A B B A A B B A A B B B A B B  
B B A B B A A A B A A B A A B A A A B A B B A A A B B  
A A B B B A B A A B B A A B B A A A A B B A B B A A  
A B A B A A B B A B B A A A A B A B A A A B B B  
A B A B A A B B A B B A A A A B A B A A A B B B  
A B A B A A B B A B B A A A A B A B A A A B B B  
A B A B A A B B A B B A A A A B A B A A A B B B

A A B B B B B B A A A B B B A A B B B B A A A  
B B A A B B B B A A A A B A A A A B A A A B A A  
A A B A A A B B A B B A A A B A B B B B B A A A  
B B A A B A B A B A B A B A A B A B B B B A A A  
- - - - - - - - - - - - - - - - - - - - - - -  
A A B B A B B A A A A B A B B A A A A B A A A A A  
B A B A A A A A B B A A A A A A A B A B B B A A A  
A A B B A B B A A B A B A A B A B A A A A A A A A  
A B A A B B B B A A B B B B B B B B B A A B A A A  
B B A A A A A B A B A B A B A B A A B B B A B A A A  
B - B A B B A B A A A B A A A B B B B A A B A A B B B  
B B B A B A A A A B A A A B A A A A A A B B A A A A  
B B B B A B A B - A A B A A B A B A B A A A B B  
A A B A B A B B A B B A B B A A A B A B B B B A A A  
A A A A B B B A A B A A A A A B B B B B B A B B  
A B B B - B B A A B A A B A A A B A A A A A B A A A  
B B A A B B A B B B A A A A B B A A A B B A A A B  
A B B A B B B B A A A A B - B B B A A A A A A A A  
A A A A B B A B A A A B B B B B A A B B B A A A A  
B B B A B B A B B B B B A A A B A B B B A B B B A A  
B A B B A B B A A A A B A A A B A A A A A A A A A A  
A A B B A B A A A B B A B B A B A A B B B B A A A  
A B A B B B B A A A A A B B A B A B B B B A A B B B  
A A B B B A A B B A B A B A A B B A A B B A A B B B  
B B A A A A A B A B B B A B A A B - B A B A A A A  
B A A B A A A A B A A A A B A B A A A A - A B B  
B A A B A A A A B A A A A B A B A A A A A A B B  
B B A A B B A B - B A A B A B B A A A B B A A A A



A A B B A A A A B A B A B A B B B A B B B B A A  
A B A A B B B B A A A B B B B B B B B B A A B A A  
A B A B B B B B A A A B B B B B B B B B B A A  
B B A A - A A B A B B B A A A B A B A A A A A A A  
A A B A - A A B B B B A B A B A A A A A A A A B B B  
B B B B B B B B A B B A A - B A A B A A A A A A A  
B A B - A B A B A A A A A A A B A A B B B A A A  
A A B B A B B B A A A A A A B B A A A B B B A A A  
A B A B B A A B B A A A B A A A B A B B B A A A  
B A B A - A B A B B A B - B A B A B A A A A A A A  
A A B A A B A A B B B B B B A B A A A B B - B A B B  
A A A A A A A A B B A A A A B B A B A - B A B B  
- B B B B B B B B B B B A B A A - - A - - A B A  
B B A A A A A B A B B A A B A A A A B B A B B B  
A B B B B B B A A B A A A B A A B A A - A B - B  
A A B B B B B A B A A B A B B B A B - B B B B B  
B A A B A B B B B B A B A A B A A B A A A A A A  
B B A B B B B B B B A B B A B B A B A B B A A A  
B A B B A B B A B A A B A A B B A - B A - A A A A  
B B B B A B B B B A A B B A - - A - A A - A A A  
B A B A A B B A B A A B A A A A A A A A A A A A  
B A B B B B B A - A A A A B A A A B A A A B A A  
B A B B B B B A A A A A A B A A B B B A A A A A  
B B A B A A B B A B B A A A A A B B A - A B B A A B  
B A B - B A B A B B B B A B B A A B B B B A A A  
B B A A A A A B A B B B A B A A B B B B A B A A A  
B A A A B A A A B B A A B A A B B B A B A A A A A  
A A B B A A A B B A A B A B B B B A B A A A A A  
A A B A A B A B B A A B A A A B A B B A A A A A  
A A B A A B A B B A A B A A A B A B B A A A A A  
A A B B B B A B B A A B A A B B A B B A A A A A

A A B B B B A B B A A B A A B B A B B A A A A A  
A A B A A B B A B B B B B B A A B B B A A A A A A  
B B A B A A A B B A B A A B A A B B A A A A A A  
A B B - A B B B B B B A B A A B B B A A B A A  
B A A A A B A A B B B B A A A B A B B A A A A A  
B A A A B A A A B A A B A A B A A A B A B B A A A A  
B A A - B A A A B A A B A A A B A B B - - A B B  
A B B A A B A A B B A B A B A A B A A B B A B B  
A B B A A B A A A B A B A B A A A A B A A B B B A A  
B A A B B B A A B A A B B A B A A A A B A A B B - A A  
B A A A A A A B B B B B B A A B A B A B B B B B B  
B B A A B B A A B A B A B A A B A B B B A A A A B B  
B A B B A A A B A A B B A B A A B A B A B B B B A A  
B A B B A A A B A A B A A A B A A B A B A B B B B A A  
B B B B A B A B A A A B A A A B A A B A B A A A A B B  
B A B B A A A B A A B A A A B A A B A B A - A A A  
B A B B A A A B A A B A A B A B A A A A B B B B B B  
B B A B A A A B B A A B A B A A B A A A B A A A A A  
B A B B A B B A A A B B A B A A B A A A B A A A A A  
B B A B B B A A B A A B B A B A A B B A A A A A A A  
A A B A B B B B A A B B A B B A B B A A A A A B A A  
B B A A B A A A A A B A B A B A A A A B B A A A A A  
A A B A B B B B A A B A B B B B A B A A A A A B A A  
A A B - - B B B A B B B B B A B A A A A A B - -  
A A B A A B B B A B B B B B A B A A A A A B A A





A A B B A A A A B B A A A A B A B B B A A B A A  
A A B B A A A A B B A A A A B A B B B A A B A A  
A B B A A A A A B A A B A A A A A B A A B B B  
A B B A A A A A B A A B A A A A A A B A A B B B  
A A A - - A B A A A B B B B A B B B A A A B A A  
B B A A A A A B A B B A A A A B B A B A A B B B  
A B A A B A A B A B B A A B A A A A B A A B A A  
A B B A B A A B A B B A A B A A B A B A A B A A  
A B B B A B B A A B A A A B A A B A A A A B A A  
A B A B A B A A B A A A A A A B A A B B B B A A  
A B - B A B A A B A A A A B A B A A B B - B A B  
A A B B B B A A B A A A B A A B A A A A B A A  
B B B A A A B A A A B A A A A B B A A A A B A A  
A B A B B B B A A A A A B B A B B B B A A B B B  
A B A B B B B A A A A A B B A B B B B A A B B B  
B A B B B B B A A A A B A A B B B A A B B B B B  
A A A B B B B A A B A A B B A B A B B B B A B B  
A A A B B B B A A B A A B B A B A B B B B A B B  
A A A B B B B A A B A A B B A B A B B B B A B B  
A A A B B B B A A B A A B B A B A B B B B A B B  
A A A B B B B A A B A A B B A B A B B B B A - -  
A A A B B B B A A B A A B B A B A - B B B A B B  
B A A B B B B A A A A B A B B B A A A B B B B B  
B A A B B B B A A A A B A B B B A A A B B B B B  
B A A B A B B A A A A B A B B B A A A B B - B B  
A B A A B A A A A B A B A A A B A A B B A A A B B  
A B A A B A A A B A B A A A B A A B A A A A B B  
A B A A B A A A B A B A A A B B A B A A A A B -  
B A A A B B B B A B B B A B B B B B B B A B B  
B B A A A B A B B B B A B B A A B A B B B B B  
B B A - A B A B B A B A A B A A B A B B B B B  
B B A B A B B B B B B B A A A A B B B B B B  
A A A A B A B A B B A B A B B A A A A A B B B  
B B A A B B A B B B A A B A A A B B A A A

A A A B A B A B A B B A A B A A A A A A A B B B  
A A A B A A A A B A A B B A B A A A A A B B B A A  
A A A B A A A A B A A B B A B A A A A A B B B A A  
A B A B - B A B A B A A A B A B A A B A A B B B  
B B A B - B A B A B A A A B A B A A B A A B B B  
B - A A A B A B A B A B A B A A B B B A B A A B B B  
B A A B A B B B B A B A B A B B A B B A A B A B  
B B A B A B A B A A A A B A A B B B A B A A B A B  
B B B A B A A A A A A A A A A B A A A A A A A A  
B A B A B B A B A A A A A A A B A A A A A A A A  
B A B A B B A B A A A A B B B B A A B A A B B B  
B A A A A B B B B A A B A B B B A A B A A B A A  
B A A A A B B B B A A B A B B B A A B A A B A A  
- - A - A A A A B B A B B B A A B B B B B B A A  
B A A B A A A A A B B A B - B A A B B B B B B A A  
B B A B A B A A A B B A B B B A A B B B B B A A  
B B A B A B A A A B B A B B B A A B B B B - B A A  
A A A A A A B B B A B A A A B B B B A A A B B B  
- B A B A B A A A B B A B A B A A B B B B - B B B  
B B A B A B A A A B A A B A A B A A B B B B B B B  
A B A B B B B A A A A B A A B A A B A B A A B A A  
A B B B B B A B B B A A A A A B B A A A A A A  
A A B A - A A A A B B B A A A A B B A A A A A B  
A - - A B - A A A B A B A A B B B B - A A A A A  
A A B A B A A A A B A B A B A A B A B B B A A A A  
A A B A B A A A A B A B A A B A B B B A A A A A  
- B A - A A A B A B B B A A A B A - B B A A A A  
B B A A A A A B A - A B A B A A A B B A A A A A  
B B A A A A A B A B B B A A A B A B A A A A A A  
B B A A A A B A B B B B A A A B A B A A A A A A  
- B A A A A B B B B B B A A A B A - A A A A A A  
- - - - - - - - - - - - - - - - - - - - - -  
B B B B A B A B B B B A A - B A B - - A A A A  
A A B B A A A A B B A A A A B A B B B A A B A A  
B A B B B A A A B B A A A A B B A A A A A B B  
B B B B A B A B A A A B A A B A B A A A B B  
A B A A B B B B A A A B B B B B A B B B B B B  
A B A B B B A A A B A A B B A B A B A A B A A

B A A B A B A A B A B B B A B A A A B B B A A A  
B A A B B B B B A A A B A B B B A A A B B B B B B  
B A - B - B B B B B A B A A B B A B A A A A A A  
B B B B A B B B B A A B B A B B A B B A A B A A  
A A A B A A B A A B A B A B B B A A A A A B B B  
B A A B B A B A A A A A A A A A A A A A A A - A A A  
A A A A B A A A A A A A A A A A A A B A A A B B B A  
A A A A A A A A A A B B B A A A A B A A A B A B B  
A A B A B A A B A A B A A B A A A B A B B B A A A  
B A A - B B B A B A B A B A A A A A B A A A A A A  
- B B A A B A A - B A B A A B A B A A A A B A A A A  
B A A A B B A A B A A A A A A A A A A A A A A A A  
B A B B B B B B A A A B A A B B B A A A A B B A B  
B A A A A B B B B A A B B B A B A B B B A B A B B A  
B B B B - A A - B B B B A B A - - B B B B A B B  
A A A A A A A A A A A A A A A A A B A A A B A A A  
B A B B A B B B B A A B A A B B B A A A B B B B B  
B A A A A A A B A A - A A A A A A A B A A B B B  
A A A A - A A B A A A A - A A A A B A A - A A A  
B B B B A - A A B B B B B B A A A A - - A B B B  
B A A B A A B B A B A B A B A B A A A A A A A B B  
A A B B A B A B B A A B A A B A B B B A B B A A A  
B B B B A B A B B A A B B B B A A A A A A A A A  
A A B B A B A B B A A B A - B B A B B A - A A A  
A A B A A B A B B A A B A A A B A B B A A A A A  
A A B B B A - A A B A - - - A B A - A A - B B A  
A A A A - A - A - - A A - A - A A A - A A A A A  
B B A A A B A B B A B B B B B B A A A B B B A A  
B A A B B B B B A A A A B A B B B A A A B B B B  
A A A A - A B A B B A B A - B A A A A A A B B B  
B A B B B B B B A A A A B B B B A A B B B B A A  
- - - - - - - - - - - - - - - - - B B B -  
A B A A B B A B B B A B A B A A B B B A A B A A  
B A A B B B B A A A A B A B B - A A - B B B B B

B B - B B B B B B B B B B B B B B - - B B B A A A  
- - - - B A A A B B A A A A B B A A A A B B A A A A A A B B  
- A A B B B B A A A A B A B B B A A A B B B B B B  
B A A B B B B A A A A B A B B B - A A B B B B B B  
B A A A A B B B A A A B A B B B A A A B B B B B B  
- - - - - - - A A - A - A B B B - A A B - B B B  
A A B A A B A A A B A B A A B A A A B A A A B A A A A  
A B A B A B A A B B A B A A A A B A A B B A A A  
- B B A B B A A B B A B A A A A B A A B B B A A  
A B B - A B A A A B A B A A A A B A A B B B A A  
- B B A B A A - A A A A A - A B A A A B A - - A  
A B B A - B A A - - - - A A A A B A A B B B A A  
A B B A A B A A A B A B A A A A B A A B B B A A  
- A B A B A - B A A B B A A B B B A B A B A A A  
- - - - - B B B - - - B B - - - B A A - - A - -  
B A B B B B B A A A A A A A B A A B A A B A B B

---





A A B B B A A B A A B B B B B A A B B B A A B B B A A  
B B B B A B A B B B B B A A B A A A B B B A B A  
B A A A A B A A A B A A A A A A A A A B B - B B  
A A A A B A A A A B A B A A B B B B A B A A A  
A A B B B B B B A B A A B A B B A A A A A B A A A  
A A B B B B B B A A B A B B B B A B B A A B A B  
A A A A A A B A B B A A A A A A B B A A A A A B  
B A B A A A A B A B A A B A A A A B B A A B B A A B  
A A A A B A A A A B A A A A A A A A A B A B B -  
A B B A B B A B A A B A A A B A B A B B A A A B  
A A A B A A B A A B A A B A B A A A B A B B B B B  
B A A B A B B A B A - B A A A B A B A B B A B A  
A B A A B A A A A A A A A A A A B A A B B B A B B  
A A A A A A A B B A B A A A B B B A A A B B A A  
B B A A B A A A A B B B B A A B B A A A B B A A  
A B A A B A A A A B A A A A - B - A B B B A B B  
B B A A B A B A A B B B A A A B A B A B B A B A  
B B A A B A B A B A B B B A A B B B B B A A B A  
B B A A A A B A A A B A A A B B B A A B A A B A  
A B B B B B B A B A B A A A A A A B B B A A B  
B A B A B A B B B B A A A A B B A A A B A A A B  
A B A B A A B A A B A B A A A B A A B B A B B A  
A A B A B A A B A A A A A A B B A B A A A B A  
B B A B B A B A B B B B A A B B A - B B B B B A  
B A B A A A B B B B A A A A B B A A A A A B A B  
B B A A B B A A A B B B B B A A B A A B A B B  
A A A A B B A A A B B A A A A B B B A A B A A A  
A B A B A A B A A B A B A A A B A A B B A B B A  
A B A A B B B A A B B A A A B B B B A A B A B B  
B A A B B B B A B A A A B B B A B B B B A A B

A B A B A A B A B B B B A A B B A B A B A B B B  
A - A A A A B A B B - B A A A A B B A A B A A B  
B A B A A A B B A B A A A A A B A B B B A A B  
B B B B B A A B B A B B B B B B A B B A B B A  
A B A A B B B A A B B B B B B A A A B A B B A B B  
A B B A B A A B B B B A A A A B B B B B B A B  
B B A A B A A A A A B A B A A B B A B A B B A A  
A B B B B B A B A A A B B B A A A A B B A A B A  
A B B B B B B B B B B A B B B A B B A A A A A B  
- A A A A B A A A B A A A A A B A A A B B A A B  
B A A B B A B A - B A B B B A B A B B B B B B B  
A A B B B B B B A A B A B B B B A B B A A B A B  
A B B B B B A B A - A B B B B A A A B A A A B A  
A B B B B - B B A B A A B B A B B A A A B B A  
B B B A A A A B A B A B A A A A A B A B B A A - B  
A A B A B B B B B B A A A A A A A B A B A A B B A A  
B A B A A A - B B A B A B A A A B B A A A B A B A B  
A B B B A B A B A B A A A A A B B A - B A B A B  
A A - B B A B A B A A A B B A A B B A B A A A A  
B A A A A A A A A B B A A A B A A A A A A B A A  
B A A A A A A A A B B A A A B A A A A A A B A A  
B A A A A A A A A B B A A A B A A A A A A B A A  
A A B A B A A B A A A B B B A A A A B B A A A A  
- - - - - - - - - - - - - - - - - - - - - -  
B A B A A A A B A B A A A A A B B A A B B A A B  
A B B B B A B B B A B B A A B B B B B A B B A  
A B B B B - A B B A B B B B A B A B B B A A B  
A B A A A B A A B B B A A A B A A B A A A B B A  
A A B B A B A B B B B A A A A B A A B B B B A A  
B A B A A A A B A B A A A A A B B A A B B A A B  
A B B B B B A B B A B B B B A B B B - B A A A B  
- A A B B B B A A B A B B B A A B A A B A A A A  
B B B A B B A B B B B A A A A B B A B B B B B B

B A A A - A A A A B B A B B B A A A A A B A A  
- - - - - - - - - - - - - - - - - - - - - - -  
A B B A B B B B B A B A A A A B - B B B B B A A  
A A - - B A A B A B A B A A A B A A A A A A A B  
A B A B A A B A A B A B A A A A B A A B B A B B A  
B A B A A A B B A A A A A A A A B A B B A A A B  
A B A A A A B A B B A A A A A A B A A A B A B A B  
B B B A A B A B B A B B B A A B B A B A B A B A B  
B B A B B A B A B B B B B A A B B A B B B B B A  
A B A A B B B A B B B A B B B A A A A B B B B B A  
A A A A B B B A B A B B B A A A A A B B A A A B B  
A B A A A A B A B B B B B A B B A B B A A A B A B  
A A B B A A B A B B A B A A A A B B A B B B A A B  
B B B B B B A B B B B A - A B A B A A B B A A B  
A A B B B B A B A B A B A A B A A B A A A A A B  
B A A B A B A A A B A A A A A B A A A B B A A A B  
A A A B A A B A A B B A A A A A A A A B A A A A A  
B A A A A B A A A B A A A A A B A A B A B A A A A  
B B A B B B B A A B B B A A B B B A B B A B A B A  
B A B A A A A B A B A A A B B B B B B B B A B B  
B B B B B A A B B B B A A B B B A B B A B A A A  
B A A B B B B A B A A A B B B B B B B B B A B B  
B A A B B A B A A B A B B B A B A B B A B B B  
B B B A B B A B B B B A A A A B B A B B B B B A

A A B A B A A B A A A B B B A A A A B B A A A A  
B B B A A B B B A B A A A A B A A A A A B B B B  
B B B A A B A B B A B B B B A B A B A B B A - B  
A B A A A B A A B B B B B B B B A B B B A B B A  
- A B B B B A B A B A B A A B B A B A A - A A A A B  
B B B A A B A B B A B B B B A B A B A B B A A B  
A A A A B B B A A A B B A A B A B A B A A A A A  
B B A B B B A A B B B A B B B B A B B A B A A A  
B B B A B B A B A B A A A A B B A A A B B B B B  
B A B B B A A B A B A B A A A A B A A A A A A B  
A B B A B A A B A A B A A B A A A B A B A A A B A A  
A B B A B A A B A A B A A B A A A B A A B B A A A  
A A B B B - A B A A B B B B B B A A B B B B A A  
A A B B A B A A B A A B A A A B - B B A B B A A B A B  
A B A A A B A A B B B B B B B B A B B B A B B A  
B B A B B - A A B B B A B B - B A B B A B A A A  
B A B A B A - - B B B B B B A A B B B - B A B B  
A A A A B B B A A A B B A A B A B - - - - - A  
A B A A A A - - A B A A A A B A B B A B A A B A  
A B B A A B B B B A A A A A - B A B B A A A A  
B A B B B B B B B A A B B B B B A B B B B A A B  
A A A A A A A A A A B A A A B B B B A A A B B B  
B A A A A B A A B A A A B B B B A B B A A B A B  
B B A B B - A A B B B A B B B B A B - A B A - A  
A B A A A B A A B B B B B B B B A B B B A B B A  
A B B B B B A B A B B A A A - B A A B B B B B B  
A B A B - A B A A B A A B B A B A A A B B B A B  
A B B B B B A B B A B B B B A B - B A B A A A B  
A B B B B B A B A B B A A A - B A - B B B B B B  
A A A B A B B A A B A B B B A A B A A B A A A B  
B B B B B B B B A B B B - A B B B A B B A B B B  
A B B B A B A B B B B B A A B A A A - B B A B A  
B A A B B B A A A B B B B B B B A B A B B A B B  
A A A B A B B A A B A B B B A A B A A B A A A B  
A A B A B B B A B B A B B A A A B A B B A A A B B A

B B A B B A B A B B B B A A - B A B B B B B B A  
A B A B A A B A A B A B A A A B A A B B A B B A  
A A A A B A B A A A A B B B B B B A A A A A B A  
B A B A B A B B B B B B B B A A B B B B B A B B  
A A A B B B B A A B A A B A B B B A B B A A B A A A  
A B A B A A B A A B A A A B A A - B - A B B A B B B  
A A B B B B A B B A A A A B B B A A A A B B A A B A  
A B B B B A A B B A B A B B A B A B A A A A A B A  
B B B B B A B B - A A B B B B B A A B B B B B A  
B B B B B A A B A B A B B B A B A B B B B A B A  
B A A B B A B A A B A A B A B B B A B A B B B B B  
B A A A B A A A B A B A B B B - B B B B A A A A  
A A B B B B B B A B A A B A A B B B A A A B B B B  
A B A A B B B A A B B A A A B A B B A A B A B A  
B B A A A A B A A A B A A A B B B A A B A B B A  
A A B B B B A B A B A A B B A B B A B A A A A B  
A A A B A A A B B B A B A A A B A B B B A A B B A  
B B A B B A A A B A A B A A A B B A B A A A A A  
- A A A B B A A A B B B B B B B A B A B B A B B  
B A A A A B B A B A A A B B A B A B B B B A B B  
B B B B A B A B A B A A A A A B A A A A B A B -  
A B A B A A B A A B A B A A A B A A B B A B B A  
A B A B A A B A A B A A B A B A A A B A A B B A  
A B A B B A B A - B B A B B B A A B A A B B A B  
- - - - - - - - - - - - - - - - - - - - - -  
A B A A A B A A A B A A A A A A A A A - A B A B B  
A A A A B A A A B A A B B B B B B A A A A B A A  
A B B A - A A B B A A A A A A B B B B B A A B  
B B A A B A A A B B B B B B B B A A B A B B A  
B B A A B A B A B B B B A A B B B B B B A B A

B B B B B A A B A B A B B B B A A B A B A A B A  
B B B A A B A B B A B B B B A B A B A B B A A B  
A A B B B B B B A B A B A A B B A B B A B A A B  
A B A B A A B A A B A A B A B - A A B A A B B A - - A  
A A B A B A A B A A A A B B B B A A A B B A A A A  
A A B B A B A B B B A A B B A A A A B B A A A B B A B  
A B B A B A B B A A A A B B B B B A A A A A A B A A A  
B B A B B B B A A A A A B B B B B A A A A A A B A A  
A A B A A A A A A A A A B A A A A B A A A A A B A A  
B A B A B A B B B B B A A B A B B B B B B A B B A B B  
A A A B B B B B A A B A A B B B B A B B A A B A A A A  
A B B A B A B B A A B A A B A B B A A A A A A B A A A  
A B A B A A B A A B A A B A B A A A B A A B B A B B A  
A B A B A A B A A B A A B A B B B A B B A A B B A B B A  
A A A B B B B B A A B A A B A A A B A A A B B A B B A  
B B A B B B B B A A A A B B A A A B A B B A A B B A A  
A A A A B A A A B A A B B B B B B A A - A A B A A  
B B A A A A B A A A B A A A B A A A B B B A A B A B B A  
B A A B B B A A B B A A B - A B B B A - B B A A A A A  
B A B B B A A B B A B B B B A A A B A A A B A A A B  
A B A A A A B A A B A A A A B A B B A B A A B A  
A B A A B B A A A B A A B B B B B B B B B B A A B  
B A A B B B B A B A A A B B B B B B B B B B A B B

B A B A B A B B A A A A A B A B A A A B B A A A  
B A A B B A A A B A A B A - A A A - - B A - A B  
B B A A A A B A A A B A A A B B B A A B A B B A  
A B B B B B A B A A A A B B B A A A A B B A A B A  
B A A A A A - A A A B A A A - - A - - - B A A  
B A A A A A A A A A B A A A B A A A A A A B A A  
B A A A A A A A B A A B B B B B A A B A A B A B  
A A A A B A A A A A B B A A A B B B B A A B A A A  
A A A B B B B A A A A A B B B B B A A A A B A B  
A B A A A B A A A A B A A A A A A A A B A B A B B  
B B B B B B B A A A B A B B B B B A A A B B A A A  
A B A A A A A A A A B B A A A B A A A A A A B A A  
B B A A B A A A A A B A B A A A A A A B B B B A  
A B A B A A B A A A B A A A B A A A A A A A A A B  
A B A B A A B A A A B A A A A A A A A A A A A A B  
A B A A A A A A A A A A A A A A A A A A A A A A A  
B B A A B B B B A A B A A A B B B B A A A B B A A  
A A A B B B B A A A B A A A A A A A A A A A A A A  
B A A A A A A A A A - A A A - B A A A A A A A B A A  
B A A A A A A A A A A B A A A B A A A A A A A A B A  
B A B A B B A B B B A A A A A A B B B A B B A A B  
A A A B B B B A A B A B B B A B B A A B A A A A A  
A A A B B B B A A B A B B B A B B A A B A A A A A  
A A A B B B B A A B A B B B A B B A A B A A A A A  
A A A B B B B A A B A B B B A B B A A B A A A A A



B B A A B A A A A A B A B B A B B A B A B B A A  
A B B B B B A A A A B A B B A B A B A A A A A A B  
A B B B B B A B A A A A B B B A A A - - A A A B A  
B B A B B B B A A A A A B B B B B A A A A A B A A  
- - - - - - - - - - - - - - - - - - - - - - - -  
A A B A B A A B A A A B B B A A A A B B A A A A  
B B A B B B B A A B B B B B B B A B A A B A A  
A A A A B A A A A A A B B B A A A A B B A A A A  
A A A A A A B A B B A A A A A B B A A A A B A B  
B A A A A - - A A B A A A A A A A A A A B B A A B  
- A B B A B A B B A B A A A B A A B B B B A A  
A B A B A B A A A A A B A A B A A A B A A A A A  
A A B B B B B A B A A A B A B A B B A B A A B  
A B B B B B A B A A A A B B B A A A A B B A A B A  
A B B A A B B B A B A A A A - B B B A B B B A B  
B A B B A B A B B A A A A A A A B A B A B B A A B  
B B B A A B A B B A B A B A B B B A B A B B A A B  
A B B B B B B A B A B A B A - A A A A B A B B A -  
A B B B B B B A B A B A B B B A B A A B A B B B  
A A B B A B A B B - A A A A B B - B A A  
A A B B A A B B A A A B B B A A A A B A A A B B B  
B A A A B A A A A A B B A A A B A A B A B A A B A  
B B A B - A B A B A A A A B A B A A A A B B A B B  
A A B B A B B B B A B A B B A A A A B A A B B B A  
A B B A B B B B A B A A A A B - B B B B B A A  
B B A B B A B A B A B A A A A A B A B B A B B B  
- A A B A A B A A - A B A A A B A B B B B B B B  
A B B B B A B A B A B B B A A A B A A A A B A  
A A B B A B A B B B A A A A B A A A B B A - A B B A  
B A B A A A - B B B A A A A B B A A A A A B A B  
A B A A B B A A A B A A A B B B B B B B B B A A B  
B A A A A B A A B A A A B B B B A B B A A B A B  
B A A A A B A A A B A A A A A B A A A A B B A A B  
A B A A A B A - B A A A A B A B B A B A A B A  
A B A A A B A A B A A A A B A B B A B A A B A  
B B B A A B A B B A B B B A B A B B A A B

A A A A B A B A B A A B A A B B B A B A A B A A  
A - B A A A B B B B A A A A A B B A B - A A A -  
A B B A A A B B B B A A A A A A A B A B B A A A A  
A B A A A B A A A - A A A A A A A A B A B A B B  
B A A A B B A A B A A A B B B B A B B A B B A B  
A B B B A A A B B B B A B B B A A B B B B A A B  
A B B A B A B B A A B A B B A A A A A A A B A A A  
B A A A B A A A B A B B A B B B B A A A A A A A  
A A A A B A A A A B B A B A A A B B A B A B A A  
A B A - B B B A B - B B B B B B B B A A B B B B  
A B A A B A A A A B A A A A A A A A B B B B B B  
B B A A A A B A A - A B A A A B B B A A B A B B A  
A B A A B A B A B A B B B A A B B B B B B - B A  
B B A B B A B A B A B B A A A A A B A B B A B B B  
B A B B B A B B A A A A A A A B A B B B A B B B  
B A A A A B A A A B A A A A A A B A A A A A B - B  
B B A A A B B A B A B A A A B B B B A B B A B  
B B B B B B B B B A A B B B A B A B B B B A A B  
B A B B B B B B B A A B B B B B A B B B B A A B  
B A A B B B B A B A A A B B B B B B B B B A B B  
B A A B B B B A B A A A B B B B B B B B B A B B  
B A B B B B B B A A A B B B B B B - B B - - -

B A B B B B B B A A A B B B B B B B A B B  
A A B B A B B B A A A B A A A - B A B A B B B B  
A B B B B B B B B B A B B B A B B A A A A B B  
A A B B A B B B - A A B A A A B B A B B A B B B  
B A A B A A A A A A A B A A - B B A A - A A A A  
B A A B A A A A A A A A A B - A A A B A A A A  
B A A A A A - A A A B A A A B A A A A - A B A A  
B A A A A A A A A A B A A A B A A A A A A B A A  
B A B B A A B B A A A A A A A B B A B A A A B B  
B A B A A A B B A A A A A A A A B A B B A A A B  
B A A A A A A B A B A A A A A A A B A B - A A A B  
B B A A A A A A A A A A A A A B B A A A A B A A  
A B B A A B A B B B A B A A B B B B A A B A B B  
B B A B B B B A A A A A B B B B A A A A A B A A  
A A B B B B B B A B B B B B B A B B B A A A B B  
A A B B B B B B B A B A B A A B B A B B A B A B  
A A B B B B B B B B A B A A B - - - - A B  
B B B B A A A B B B B B B B - A - A A A - A A B  
A B B B B B B B B B B A B B B A B B A A A A B B  
A A B A B A A B A A A A A B B B A A A A B B A A  
A B B B B B B B B B B A B B B A B B A A - A A B  
A B B B B B B B B B B A B B B A - B A A A B B B  
B A B A B A B B B B B B B B A A B B B B B A B B  
B A B A B A B B B B B B B B A A B B B B A B B  
A A A A B A A A A A A A B B B A A A A B B A A A  
A B B B B B B B B B B A B B B A B B A A A A B B  
A B B B B B B B B B B A B B B - - B A A A A B B  
A A A A B A A A A A A A B B B B A B A B A A B B A  
A A B B B A A B B B A B B B B B B A A B B A A A  
A B A B B A A A B B B B B B B A A A A B - A A B  
A B A B B B A A A B B A B B B B B B A A B B B B  
A B A A B B B A A B B A A A B B B B A A B B B B  
A B A B B A B A B B B A B B A A A B B A A B A B  
A B A A B B B A A B B B A B B B A A B A A B B A B  
A B A B B A B A B B B A B B B A A B A A B B A B  
A B A B B A B A B B B A B B B A A B A A B B A B

A B A B B - B A B B B B B B B - B B A A B B B B  
A B A B B B B A B B B B B B B B A B A A B B B B  
A A A B B B A A B A B B A A A B B A A A A B A B  
A A A A A B A A A B A A A A A A B A B A A B A B B  
B A B A A A B B B B B A A A B B B B B A A A A A A  
B A A A A B A A B A B A B B B - A B B A - B A A  
B A A A B B A A B A B A B B B B A B B A - - A A  
B A A A A B A A B A A A B B B B A B B A A B A B  
B A A A A B A A B A A A B B B B A B B A A B A B  
A A A B B B B A A A A A A B B A B B A A A A B A B  
B B B A A B A B B A B A B A A A A B A B A A B  
B B A B A B B A B A B A A A A A A B - B B A B A  
B B A B A B B A B A B A A A A A A B - B B A B A  
A B B B B B A B A A A B B B A A A A B B A - B A  
A B B A B B - B B B B B B A A B B B A - B A B  
A B B B B A A A A A A A A A A B A - A B A A B  
A A A A B A A A A A A A B B A A A B B B A A A A  
A B B B B B A B A B A B B B A A A B A A A B A  
A B B B B B A B A A A B B B A - A A B B A A B A  
B B A A B A B A B A B B A A B A B B A B B B B  
A A A A B B B A B A B A A A B B A A B B A B A A  
A A B B B B A B A B A A B B A B B A - A A A A B  
A A B B B B A B A B A A B B A B B A - A A A A B  
A A B B B B A B A B A A B B A A A A A A A A B  
A A B B B B A B A B A A B B A A A A A A A A B  
A A B A A B B A A A A A A A A A A A A A A A B  
B A B - A A - B B B A A A A B B A A A A A A A B  
B A B B A A A B B B A A A A B B A A A - A - A B  
A A B B B A B B A A B A B B B B A B B A A A A B  
A A B A B A B B A A B A A B B B B A B B A A B A B

B B B B B B A B B B A B A A B B B A B B B A A  
B B A A B A B A B B B B A A B B B B B B B B B A A  
A B B A A A B B B B B A A A A B B B B B B B A B  
A B - A A A A B B B B B A B B B B A A A B A A B  
B A B A B A B B B B B B B B A A B B B B B A B B  
B A B A B A B B B B B B B B A A B B B B B A B B  
B B B A A A A B B B A A A A B A B A A - B A B B  
B B B A A A A B B B A A A A B B B A A A B B B B  
B B B A A A A A B B A A A A B A B A - A A A B B  
A A A A A A A A A A B A A A B B - B A A A A B A  
A A B B A A A B A A B A A A B B B B B A A - B B  
A A - B A A - B A A B A A A B B B - A A A A B B  
A A B B B A A B A A A A A A B A A B A A B B A B  
A A B B B A A B A A A A A A B A - B A A B B A B  
A A B B B A A B A A A A A A A B A A B A A B B A B  
A B A A A A B A A A A A A A A A B B B A A B A A B  
A B A A A A B A A A A A A A A A - B B A A B A A B  
A B A A A A B A A A A A A A A A - B B A A B A A B  
A B A A A A B A A A A A A A A A B B B A A B A A B  
B B B B B A A B A B A B A B B B A A B A A B A A  
B B B B B A A B A B A B B B B B A B A B A A B A  
B B B B B A A B A B A B B B B B A B A B A A B A  
B B B B A B A B B B B B A A B A A A - B B A B A  
B B B B A B A B B B B B A A B A A A B B B A B A  
A B B B A B A B B B B B A A B A A A A B B A B B  
A B B B A B A B B B B B A A B A A A A B B A B A  
A A B B A B A B B B B B A A A A A A B B B B B A  
A A B B A B A B B B A A A A A B A A B B B A A A  
A A B B A B A B B B A A A A A B B A A B B B A A  
A B B A A B B B B B A A A A A A B B A B B A A A  
A B B A A B B B B B A A A A A A - B A B B A A A  
A A A A A B A B B A A A A A B B A A B A A - B  
A A A A B A B A B A A B A A B - B A B A A - A A  
A - B B B B B A B B A A A A A B B A A A A B A B  
A A A B B B B A B A A A B B B B B A B A B

A A A A B B B A B A A A A A B B A A B A A B A B  
A A A A B B B A B A A A A A B B A A B A A B A B  
B A A B B A A A B A A B A A B B B A A B A A A B  
B A A B B A A A B A A B A A B B B A A B A A A B  
A A B B A B B A A A B B A A A A A A A A A B A A A  
B B A B B A B B B B A A A A A A A B A B B A B B B  
B A B B B A B B A A A A A A A B B A B B A A B A  
B A B B B A B B A A A A A A A A A B A B A B B B  
A A B B B A A B B B A B B B B B B - B B A A A A  
A A B B B A A B B B A B B B B B B A B B A A A A  
B A B B B A B B A B A A A A A A B A B A B B B  
B A A B B B B A A A A A B A A A A A A A B B A  
A A A B A A B A A B A A B A A A B A B B B B B  
A B A A B B A A A B A A B A A A A B A B B B B B  
A A A B A A B A A B A A B A A A B A B B B B B  
A B B A A B A B A B A A A A B B B B A B B A A B  
A B B A A B A B A B A A A A B - B B A B B - A B  
A B B A A B A B A B A B A A A A B B B A B B A A B  
A B A B A A B A A B A B A A A A - A A B B A B B A  
A B A B A A B A A B A B A B A A A B A A B B A B A  
A B A B A A B A A B A B A A A A B A A B B A B B A  
A A B A B B B B B B A B A A A A A A B A A B B - B A  
A A B B B B B B A B - A B B B - A A A A - - B B  
A B A A B - - A B A B A B B B B A A A A - - B -  
A A A A B A A A A A A B B B B B B A B A B B B A  
A A A A B A A A A A A B B B B B B A B A B B B A  
A A A A B A A A A A A B B B B - B A B A A B B -  
A A A A B A A A A B A B A A B B B B B A B A A A  
A A A A B B B A A A B B A A B A B A B A A A A  
B B B A A B A B B - B B B B A B A B A B B - A B

A B A A B A B A A B A B A A B B B B B A A A B A  
A A A A B A A A A B B A A A B A B B A A B A A A A  
A A A A B A A A A B B A A A B B B B A A B A A A A  
A B A B A A B A B B B B A A B - A B A B A B A - B B  
B B A B A A A A B B B B A A B - A B A B A B B B  
- B A B A A A A B B B B A - B B A B A B A B B B  
A A A A B A B A B A B A B B B - B B A B A B B B  
A B A A A A A A B B B B A A B B A B A B A B A B  
A B B B A B A B B A A B B B B B B B A A A A B A A B  
A A B B A B A B B A B A A A B - A A B B B B A A  
A A B B A B A B B A B A A A B A A B A B B A A  
B B B B B A A B A B A B B B B B A B B B B A B A  
B A B A A A A B A A A B A B A A A B A A B A A B A  
B A B A A A B A B B B B A A A B B A A A B B B A B  
B A A A B B A A B B B B A A A A B B - B B B - - A  
B B B A B B A B B B B A A A A B B B A B B B B A  
A B A B B B A A - B B A A A - - A A B - B B B B  
A B B B B B A B B B B A A A B B A A A B B B B B  
A B B B B B B A B A B A B B B - - A A B B B - B B  
A A A A A B A A A - A A - A A A A - - A B - B B  
A A A A A B A A A B A A A A A A A A A A A B A B B  
A B A A A B A A A - A A A A A A A A A B A B A B B  
A B A A A B A A A B A A A A A A A A A B A B A - B  
A B A A A B A A A B A A A A A - A B B B B B B B  
- - - - - - - - - - - - - - - - - - - - - -  
A B B B B A A B B B B B B B A A B B A B A A B  
A A A A B B B A B A A A A A B B A A B A A A A B  
B A B A B A B B B B B B B B A A B B B - B A B B  
A A B B B B B A B A B A A B B A B B A B A A B  
A B B A A B B B B B A A A A A - B A B B A A A A  
A A B B B A B B A B A A B B A B B A A A B B A

A A B A A A A B A B A B A A A B A B A B A A A B  
A B A B A A B A A B A B A A B B A A B B A B B A B B A  
A A B A B A A B A A B - B B A - B B A - A - A A  
B A B A B A A B B A B B B B A B - B A B B - A A  
A A A A B B B A A B B A A A B B A B A - A A A A  
B B A A A A A B A B B B A A B B A A A A A A A A A A  
A A A A - A A A A A A A A A A A - A A A A A A - A A  
A A A A A A A A A A A B A A A B A A A B A A B B A A  
B B B A B B B A A A A A A A A A A B B A A A A A A A A  
A A B B B B A B A B A A B A A B B A B B A A A A A B  
B A A B - A B A B B B A A A A A B B A B B B B B B - A A  
B B B A A B A B B - A A A A A A A A A A - A B B A A A A  
- A B A B B B - A A B B A A - - B A B A A A A - A A  
B B - A A A B B A A A A B B A B A A A - - - A A  
- - B B B B A A A B B B B B B - A A B A A - A A  
B B B B B B A B B B A B A A B A B A B B B - A A  
A B A B A - B A A - - B A A A B A A - B A - B A



|   |   |   |   |   |   |   |   |   |   |   |   |   |   |   |   |   |   |   |   |   |   |   |   |   |
|---|---|---|---|---|---|---|---|---|---|---|---|---|---|---|---|---|---|---|---|---|---|---|---|---|
| A | B | A | A | A | A | B | A | A | A | A | A | A | A | A | B | A | A | A | A | B | A | A |   |   |
| B | A | B | A | B | A | B | B | B | B | B | B | B | B | A | - | B | B | B | B | B | - | B | B |   |
| A | B | A | B | A | A | B | B | A | B | A | B | A | A | A | - | A | A | B | B | A | - | B | A |   |
| A | B | A | B | - | - | - | - | - | B | A | B | A | A | A | B | A | A | B | B | A | - | B | A |   |
| A | B | A | B | A | - | B | A | A | B | A | B | A | A | A | - | A | A | B | B | A | - | B | A |   |
| A | B | A | A | A | A | B | A | A | B | A | B | A | A | A | B | A | A | B | B | A | B | B | A |   |
| A | A | B | A | - | A | A | A | A | A | - | B | B | B | A | A | A | A | - | A | A | - | A | A |   |
| B | A | B | A | A | A | A | B | A | B | A | - | A | A | A | B | B | A | A | B | B | - | A | B |   |
| B | A | B | A | A | A | B | B | A | A | A | A | A | A | A | A | B | A | B | B | A | - | A | B |   |
| B | A | B | A | A | A | B | B | A | A | A | B | B | B | - | A | B | - | - | A | - | B | - | A | B |
| B | A | B | A | A | A | B | B | A | A | A | A | A | A | A | A | - | A | B | B | A | - | A | B |   |
| B | A | B | A | A | A | B | B | A | - | A | A | - | A | A | - | B | A | B | B | A | - | A | B |   |
| A | A | - | B | B | B | A | B | A | B | A | - | B | B | A | A | B | A | B | A | A | - | A | B |   |
| - | - | - | B | B | A | - | A | B | - | A | A | B | B | B | B | B | B | B | B | A | - | A | A |   |
| A | A | A | B | B | A | B | A | B | A | A | A | B | B | B | A | B | B | B | B | B | - | A | A |   |



A A A A A B B A B B B B B B A A A A B A A B A A B A B  
A B B B B A B B B B B B A A B A B B A B B A A A  
A A A A B A A A B B B A A B B A A A A A A A B A A  
A A B B A B A A A B B B A A B A B B B B B B A B B  
B B B A B A A A B B B A B B A A B A A A A A B - A  
A A B B A B A A A B A A A B A A B B A - B A B B B A  
B A A A B B B A B A A A A A B A B B A B A B A B A  
B A A B A B B B A A A B A A A B A A A B B A B A A A  
B A A A - A - B A A A B B B A B B - A B B B A B  
A B A A A A A A B B B B A A B B B A B A B B B B  
B A B A B A A B B A A B B B A A A A A B B B A B A  
A B A B B A A B A B B B A A A A - B A A A - A B B B A B  
A A A A B A B A B A A A A A A A A A B B B B A B B  
A A B B A A B A B A B B B A A A A A A A A A B B A  
A A A A B A B A B A A A A A A A A A A A A A A A A  
B B A B B A A B A B B B A A A A A A A A A A A A A  
A A A A B A B A B A A A A A A A A A A A A A A A A  
- B A A A A B A B A A A B A B A B A A A A A B A B  
B B A A B B A A A A A B A A A - B B A B A - B -  
A B B A A B B B B B B B B B A B A B B A A A B  
A A A A B A B A B B B A A B A B A A B A A A A B B  
B A A A B A B A B A A B A B B A B A A A A A A B A  
B B A B A A B B A A A A B A B A A A A B A A A B B  
B A B A B B B B B A A A A A A A B B B B A B A A A  
A A B A B B B B B B B B B B A A B B A B A B A B  
B A B A B A B A - A A A A A A A A B B A A A B B A  
B A A B A A B A A B B B A A B A A A B A A A A A A  
B A A B A A A B A A A A B A B A A A - B A B B A -  
B A B A B A B B A A A A A A A A B A B A A B - - -  
A A A A A A A A B A A A A B B A B A - A A A A A B  
A A A B A A B A A A A A B B A A B A B A A A B A -  
B A B A B B A B A A A A A A B A A A B A B B B A B  
B A A A B B B A B A A B B A A B B B A A B A B A  
A B A A A B A B A B B A B A B B B - B A B B A B

A B A A B A B B B B B B B B A B B - B B B A B A  
B B A B A A A B A B B A B A A A B A A A A B A B  
B - B A A B A A A A A A B A B B A A - B A B A A B  
A B B B A A B B A B B - B B A A B A A B A B B  
B A A B B B B B A B B B A B A A B B B A B B A A  
B A A A B B B A A A A B B A A B B B A A A A B A  
A B B A B B B A A A A A B B B B B A B A A A  
A A - B A A B A B B B A A A A B B B B B A - B  
B A B A A B B B B A A A B B A B B - B B A B B B  
B B A B B A A A A A B A B B A A B - A B B A B A  
B A A A B A A A B B B B B B A A A A B B A A A A  
B A B B B A B A A A A A B A B B A - B A B B B A  
A B - A B A B A B B B A A A A B A B A A B B A B -  
B B B A B A A A B B B A B B A A A A B A A A A B A  
B B A A A B A A A A A A B A B B A A B B A B A A B  
A B A A A B A B A B B A B A B A B B B B B A A -  
B A B B B A B B B B B A A A A A B A B A A B B A A B  
- B B B B A B B B A A A A A A B B B A B A A A A A  
A B B B B A B B B A A A A A B B B A B A A A A A  
B - B B B A B B B A A A A A B B B A B A A A A A  
A A - A B A B B A B B A B A A B A A A B B A B A  
- - - - - - - - - - - - - - - - - - - - - -  
B A A B A B B B A A A B A B A A A - B A B A A -  
B B A A A A B B A A A B A A A A B A A B B A B A  
A B A B B A B A B B A A A A A A B B A A B B B B  
B B A B A A B A B B B A B A A B A - A B A B B -  
A B B A B A B B B B B A A B A B B A B A B A B  
B A A B A B B B A A A B A B A A A - B A B A A -  
A B A A B A B A B B A A A A A B B A A B B - B B  
B B A B A - - B B A A A B A A A A A B A B B A  
A A A A B B B B B B B B B A A A - B B B B B B

B A B B B A B B B A A A A A B B B A B A A A A A  
- - - - - - - - - - - - - - - - - - - - - - - - -  
B B B A B B B A A A A B B B A B B - B A B A A B  
B B B A A A B A B B B B A A B A B B A A A B A A  
B A A A B B A B A A A A A - B A A A - A B B B A B  
B A A A A B A B A A A B A B B A A B B A B A A A  
B B B A B B B A B A A A A A A A B A A - - B B A A -  
B B A B A A B B A B A B B B B B A A A B B A A B A A  
B B A A B B B A A B A A B A B A B A A B A B A A A  
B B A A B B B A A A A A B A A A B B B A B A B B B  
A B B A B A B B B B B B A A B A B B A B A B A B  
A B A B A B A B A B A B B A B A A B B A A A B B A B  
B B A B B A A B A B B A B B A B B A A A B B A A B A A  
A A B B A B A A B A A B B B A A A B B A B B A B B B  
A A B A B B A A B B B B A A A B B A B B A A B B B  
B A - B B A B B B A A A A A A B B B A B A A A A A  
B B B B B A A A A - B A B B A A B A A B B A B A  
B A B A B B A B A A A A A B B A A A B A B B B A B  
A B A A A A B A B A A B B A A B B A A B B A B B B  
A A A B A A A B B B B A B B A A B B A B B B A A A  
A A A B A A A B B B B A B B A A B A B A A B B B  
A A A A B A - A B B B A A B A A A B B A A B A A  
B B B B A A B B B B B B A A B A A B B A B A B B  
A B B A B A B B B B B A A B A B A B A A B B A A A  
B B B B A A A B B B A A B B B - A A B A B B  
A A - A B A A A B B B A A B B A A - B A A B A B  
B A A B A B B A A A A A A A B B B B B A A B A A  
B A B A A B B B B A A B B B A A B B B B A B A B  
B A A A B B B A B A A B B B A A A B A A A B B B  
A A B B A A A B B A A A B B A A B A B A A B B B  
B A A B A B B A B B B B B B A A A - B B B B A B  
A A A A A B B B B B B B B B A A A A B A B B A B -

A A B A B A B B A B B A B A A B A A A B B A B A  
A A A A B A B A B B B B B B B B - A A A A A A  
B B A A A A A A A A A - A A B A A A A B B A A A  
A B - B B A B B B B B B B B A A B - A A A A A B  
B A - A A B B B B A - B B B A A B B B B A - A B  
B B A A A A - A A A A B A A B B A - - B B A A -  
B B A B B B B A B A A B B B A A A B A A A B B B  
A A B A A A B A A B B A A - A A A - A B B A A A  
B A A A B A B A B B B B B B B B - B A A A A A  
B B B A A A B B A B B A A A B A A A B A A A  
B B B A A A B B A A A A B A A A A B - A B B A B -  
B A A B A A B A A A A B A A B B A - B A A B A A  
B A A A B B B B B B B B B A B B B A B B A A B A  
A A A A B B A B B A A A A A A A - B A A B A B  
A A B B A A A B B A A B B B B B B A B B A A A A  
A B B A B A A B A A A B A A A B - A A A B B -  
A B A B B A B B B B B B B B B A A B - A A A A B  
A B B A B B A A B A B B A A A A A A - A B A B B B  
A A A A B B A B B A A A A A A A - A B B A A A  
A A - A A A B A A B - - - B B A B - A - A B B A A A  
B A B A B A B B B A A A A A B B B A A A A A A B  
A B A A B A B A B B A A A A B B B A A B B A B A  
A A A B A B A B B B B B B A B - A - A B B A A -  
B B A B - B B B B - A A B B A A A A B A B B A  
A A - B A A A B B A A A B B A A B A B A A B B B  
A - - B B A B B B B B B A A B A B - A - B A A B  
A A A B B B A A B A A B B B A B B B A A A A B A  
B B A B A B B B B A A A B B A A - A A B A B B B  
B B B A B A A A B B B A B B A A A A A A A B A A

B B - B A A B B A B B B B B B B B B A B B B B  
B A A A B B B B A A A A - B A A A - A B B B A B  
B B A B B B A A A A A B B B A A A B A A B B B B  
A B A A B B A B A A A B B A B B B B B A A A A B  
B B A B A B B B B B A A A B A A A A - A B A B B B  
B A B A A B A B B A A A A A A A B B B B B B B B -  
B A B A A B B B B A A A B B A B B - B B A B B B  
A A A - B A B A B A A A A A A B A B A B B B A B B  
A B B A A B B B B B A A B B A A B B B B A A A B B  
A B B A A A A B A A A A B A B B A A B A A A B A  
B A B A B B A B B B B A A A A A B A B A B A A A A  
B A - A B B B B B A A B B B B A A B B B B A B A -  
B A B A B A A B B B B B A A - A B B B B A B  
B B B A A A A - A A A B A A B A B B A B B B - A  
B B B A A A B A A B B A A A A A A A A A B B A A A  
A A B A A A B A A B B A A A A A A A A A B B A A A  
A B A A B A A B A A A - A B B A B A B B A A A -  
B - - B B B B A A A A B B B B A B B B A B A B B  
B A A B B A - B A B B A B A A B A A B B A B A B  
B A A B B B B B A A A B A B A A A A B A A A B B  
A A A B B B A A B A A B B B A B A B B - A A B A  
B B B A B B B A B A A A A A A A A A - B B B B B  
B A A A B A A A B B B B B B B B - B B A - A A A  
- A B A B B A B A A A A - B A A A - A - B B A B  
B A B A B B A B A A A A B B A A A B A B B B A B  
B A A B B A B A A A A A B B B B A A A - - - A B  
- - - - - - - - - - - - - - - - - - - - - -  
A A A A B A A A B B B B A B A B A - B A A A B A  
A A A A B B A A A A A A A A A B B B B B B B A  
B B A A A A B A B A A - B A B A B A B A A - - B  
A A A A A A B A B A B A B B A A B A A A B A B A  
B B A B A A B B A A - B A B A A A A B A A A B B

A B B B A A B A A A A A B A B A B A B A A B A A  
B B - A A A A A A A A B A A B B A - - B B A A B  
B A B A B A B A A B B B B B A A B B A B B A B  
B A A A B B A B A A A A B B A A A A A B B A B  
A A B A B A B B A B B A A A A A B B A B B A A A A  
A A B B A B A A B A A A B A A B B B B B A A B  
A A A B A B A B B B B B B A A B - B A B A B A  
B B B A B B B A A A A B A B B A B A B A B B B A  
B B B B B A B B B A A A B A B B B A B B A A A B  
A B A A B B A B A A A A B B A B B B B A A A A B  
B B A B A B B B B A A A - A A B A A A A A B B B A B  
B A A A B B A B A A A A B B A A A A A B B B A -  
B B A B A B B B B A A A - A B A B B B A A B A B A B  
- A A B B A B B A A - A B A B B B A A B A B A B  
A A B B A A A A B A A A B B A A B A A B B A B -  
B B - B B A B A B A A B A - B A A A A A A A A A  
B A A A A B B B B A A A A B B B A B A B A B B B  
A B B B A B B B A B B A B A A A B B A A A A B B  
A B A A A A A B B A A A A A A B A B A B A B A B A  
A A A B A B A B B B B B B B A A B A B A B A B A  
A A A B A B A B B B B B B B A A B - B A B A B A  
B A B B A B B B B A A A A A A B B B - B A A A A A  
B A A B B B B A B B B A B B B B A B A A A B A A  
A A A B B A A A A A A A A A A A B B B B B B B A  
A B A B A B B B A B B A B A A A B B A A A A B B  
B B B B B A A A B B B B A B A B B A A A B A A B  
A A A A B A A A B A A A A A B A B A B B B A - A  
B A B A B A B - - A A A - A A A B - A A A B B A  
B B B B A A A B A A A A A B B B B A A A B A A -  
B A A A B B A B B B B A A A B B B A B A B A B B  
A B B B B B A B B B B A B A A B B B B A B B A B



B A B B A A A A A A A A B A A B B B B B B - A A  
B A B - B - B A A A - - - - - - - - - - - -  
B A B B A B B B B A A A A A B B B - B A A A A A  
B A B A A B B B B A A A B A - A B A B B A A A A  
B B B B B A B B B A A A B A B B B A B B A A A A  
B A A B B B B A B B B A A A A A A A B A A A B A B  
B A A B A A B A A A A A B A A A B A A B A A B A A  
B A A A A B A A A B B B A A A A A B B A B A B A A  
A A A A B A A A B B B B A B A B A B A B B A A A B B  
A B B A A B B B A A A A B B B A B B B B A A A B A  
B B A A B B B B A A B B B A A A A A B B B A B B A B  
B - B B B A B B B A A A A A A B B B A B A A A A A  
B A A A B A A A A A - B A B B A B A A A B B B A  
B A B A B A B B B A A A A A A B B B - A A A A A B  
B - A B B A B A A A A A B B B B A A A A B B A B  
A B A B A B B A B B B A B B A B A A A B - B A A B A A  
- A A B - B B - B - - B A B - - - B B A - - - A  
A A B A B B A A B B B B B A A A A B B B A B B B  
B B B A A A - A B B B B A A B - B - A A A B A A  
B A A A B B B A B A A A B B A A B B B A A B A B -  
B A A B B A B A A A A A B B B B A A A A B B A B  
B B B B B B B A A A A A B B B B A B A B A B A B B  
A B A A A B A B B B B A B A A B B B B A B B - B  
A A B B A A B A B A B A B A B A B A A B B A A B B  
A B B A B A B B B B B B B A A B A B B A B A A A B  
A B A B B A B A B A B B B A A A A B A B A A - B A B A  
B A A B B A B A A A A A A B B B A A - A A A B A B  
A A A B A B B B B B A A A B B A A A A B A A A A A  
B A A B B B B A A A A A - B A A A - A B B B A B  
B A B A B A B A A A A A A A A A B B A A A B B A  
A A A B A A B A A B B A B A A A B A A A A A B A  
B B B B B A B B B A A A A A A B B B A - A A A A A  
A B B B B B A B B B B A A A A A B B B A B B A A A  
A A A A A B B B B B B A B A - A A B A B B A B A  
B B A B A B B B B A A A B A A A A B A B A B B B  
B B A B A B B B B A A A B A A A A B A B A B B B  
B B A B A B B B B A A A B A A A A A A B A B A B B  
B B A B A B B B B A A A A B A A A A B A B A B B B

A A B B A A B A B B B A A A A B B - B B B A - B  
A B A A B A B A B B B A A A B B B A A B B A A A  
B A B B A B B B B A A A B B A B B A B B A B B A  
A A A B A B A B B B B B B B A A B - B A B A B A  
- - - - - - - - - - - - - - - - - - - - - -  
A A B A B A B B A B B B B A A B A A A B B A B A  
B A A B A A B B B B B A B B A A B A B A A B B B  
A A B A A A B B A B B A A A B B B A A B B A B A  
B B B A B B B A B A A B B B A A B - - A B B B A  
A A A A B A A A B B B A A B B A A B A A A B A A  
A A B B A A A B B B B A B A B A B A A A A A B A  
B B A B B - B A B A A B A A B A A A A A A A A A  
B A - A B A B A A B B B B B B B B A A - B A B - A -  
B A B A A B B B B A A A B B A B B A B B A B A B  
A A A A B B A B B B B A A A B B A B B A B A A A  
B A - A A A A A B B B B A B A A B A A A A A A A  
A A B B B A A B A A A A A A A A A A A A A A A A  
B B B A B B B A A A A A B B B A B B - B A B A A A  
A A - A B B B B B B B B B A A B B B A B A - A -  
B B B A B B B B B A B B A B B B B A B A B A B A B  
A B A A B A A B B A A B B A A B A B A B B A A A A  
B A - B A B B B A A A A A A A B B B A B A A B A A  
A B B A B A B B B B B B B A A B A B - A B A B A -  
B B B A A A A B A A A A B A A B A B B - B B B A A  
B A B A B A B A A A A A A A A A B A B - A A B B B -  
B B B A B - A B B B B A A A B B B - B A B A B B  
A B B A B A A B A A A B A A A B B - A A A B B -  
B A A A B A A A B B B A A B B A A B B A A A A B  
B B B B A A A B A A A A A A B B B B A A A B A A B  
B B B B A A A B A A A A A A B B B B A A A B A A B  
A B B A A A A A A A A A B A A B B A A A B B A A B

A A A A B B A A A A A - A A A A B B B B A B B A  
B B B A B B B A A A A B A B B A B - B A B B B A  
B B B B B B B A A A A B A B B A B B B A B B B A  
A A A A B A A A B B B B A B A B A - B A A A B A  
A B A A B A B B A A A B A A A B B A A A A A B A  
B B A A A A B A B A A A B A B A B A A A A B A B  
B A B B A B A A B B B B B B A A B A A - B A B A B B  
B A B B A B B B B B B B B B A B B - B B A B B B  
B B B A A A A B A A A A B A A B A B B A B B B A A  
B A A B B A B A A A A A A B B B A A B A A A B A B  
A A A A B A B A B B A A A A A A B B B B B B A A B  
A A A A B B A B B A A A A A B A B B B B B A A B  
A A A A B B A B B A A A A A B A B B B B B A A B  
A A A A B B A B B A A A A A A A B B B B B A A B  
B A B B A A A A A A A A B B A B B - - B B A B B  
B A B B A A A A A A A A B B A B B A B B B A A A  
A A A A B A A A B A A A A A B A B A A B - A B B  
A A A B A A B A A B B A A A A B B A B B B A A B  
A B B B B A B A B B - A A A A B B A A B B B B B  
A B - A B A B A B B A A A A A B B A A B B B B B  
B B B A A A A A A A A A B A - B B A B - B B A A B  
B B B B A A B B B A A B A B B A A A A A - - -  
A B B B A B B B A A A B B - A B B B B B B B B B  
A B - A B A B A A B B A A B B B A - A A B B B B  
A B A B A B A B A B B A B - A B B A A A B B A A  
A B A A B B A B A B B A B A B B B - B A B B A B  
A B A A A B A B B B B A B A A B B B B A B B A B  
A B A B A B A B B B B A B A A B B B B A B B A B  
A B - B A A A B B A A A B A A B B - B A A A A A

A B B B A A A B B A A A B A A B B B A A B A B  
B A A A A B A B B B B A A B A - - B B B A A B -  
B B B B B A A A A A B A B B A A B - A B B A B A  
B A - A A B A B B A A A A A A B B B B B B - B -  
B - B B B B A B B B A A B - - - B A B A B B B B  
B B - B B A A B B B A - A B A B B B - A B A A A  
B B B B B A B B B A A A B A B B B A B B A A A B  
B B B B B A B B B A A A B A B B B A B B A A A A  
B - A A A B B B A A A B A B B A A A B A B A A A  
B - - A A B A B A A A B A B B A A A B A B A A A  
B A B B B A B B B A A A A A B B B A B A A A A A  
- - - A A - A A A A A - - B - A A - B A - A A -  
B A A B B B B B B A A A A A B B B A B A B A A A  
B A A B A B B B B B B B A A B A A B - B A B A A -  
A A A B A B A B B B B B B B B A A B B B A B A B B  
B A A A B A B A A B B B B B B A A A A B A A A A A  
B A B A B A B A A B B B B B B A A A - B A A B A A  
B A A A B A B A A B B B B B B B A A B B A B B A -  
B A A A B A B A A B B A B B B B B A A - B A B A A A  
B B B B B A A A A A B A B B A - B B A B B A - A  
A A B A B A B B A B B A B B B A A B A A A B B A B A  
B B - B B A A A A A B A B B B A B B A B B A B B  
B B A B B A A A A A B A B B B A B B A A A A B B  
A B A A B B A B A A A A B B A B B B B A A A A A B  
A A B A A A B B A B B A A A B B B A A B B A B A  
- B B B B A - A - - B A B B A A B A A B B A B A  
B B B B B A A A A A B A B B A - B - A B B A B A  
A A A B A A B A B B B B A A A A A A B B B A A A  
A B A B B B A B A A A A A A A B B A B A A A B A  
B A A A B B B A B A A A B A A - B B A A A - B A  
B B - B B A B A A A A A A B B B A - A A B - B B  
B A A A B B B A B A A B B B A B B B A A A A B A  
B B A A B B B A B A A B B A A B B B A A B A B -  
B A A B B A B A A A A A B B B B A - - A B B A B  
B A A B B A B A A A A A B B B B A B A A B B A B  
B A A B B A B A A A A A B B B B A - A A B - A B

B A A B B A B A A A A A B B B A - - A A A B A B  
B A A B B A B A A A A A B B B A A A A A B A B  
B A B B B A A A A A A A B B B A A A A B B A A  
A A A A B A A A B B B A A A B A A A B B A A A A  
A B A A A A B B B B B A A A B A B A B A B A A A  
A B B A B A B B A B B B A - A B B A A A A B B A  
A B - A B A B B A B B B A A A B B A - A A B B -  
A B B A B A A B A A A B A A A B B B A A A B B B  
A B B A B A A B A A A B A A A B B - A A A B B -  
A B B A B A A B A A A B A A A B B - A A A B B A  
B B B A B B B A B A A A B A A A B B A A B B B B  
B B B A A A A A A A A A B A A B A A B B B A A B  
B B B A B B B A B A A A B - A A A A B B B B B  
A B B A B B B A B A A A B A A A A - A B A B B B  
B A B A A B B B B A A A B B A B B - - B - B B B  
B - A A A A B A A A A A A A - B B B A - B A A A  
A B B B B A B A B A A B B B B B B - A B B - A A  
A A B A A A B B A B B A B B A A A A B A A B B B B  
B A - B A B B B B B B B B B A B B - B B A B B -  
B A B A A B B B B A A A B B A B B - B B A B A B  
B B B B A A B B A A B A A A B A A A B A B A A  
B B B B B B B A B B A A A A A A B B B B A A A B A A  
B A - A - - - B B A A B B - A - B B B B A - - -  
A A A A B B A A A A A A A A B B A A B A A A A A  
A A A A B B A A A A A A A A B B B B B A A A A A  
B A A B B B B B B B B B A A A A B A A A A A B B  
B B B B A A A B A A A A A A B B B - A A A B A A B  
B B B B A A A B A A A A A A A B B B B A A A B A A  
B B B B A A B A A A A A A B B B B A - A B A A A A  
A B B A B B B A A B B B B B A A B B A B A A A B  
B A B A B A B A A A A A A A B A B - A A B B B -  
B A B A B A B B A A A A A A B A B A A A B B B B  
B A A A B A B A A A A A B A B B A B B A B B B A  
B A A A B A B A A A A A B A B B A - B A B B B A

B B A B B A A B A B B A B B A A A B B A A B A A  
B B A B A A B B A B B B B B B A A - B A A - A A  
A B B A B B B A A A A A B B A A B A B A A A A A  
A B B B B B B B B A A B A A A B B A B B B B A A A A B  
B B B B B B B A A B B B A B A B B - A A A A A B  
B B B B B B B A A B B B B A B A B B - A B A A A B  
B B B B B B B B A B B B A A A B B - A A A A - A  
B B B B B B B - B A B B B A A A B B - A A A A - A  
B B - B A A B B A B B B A A A A B A B A A B A A  
B B B B A A B B A B B B A A A A B B B A A - A A  
B B - B A A B B A B B B A A A A B B B A A B A A  
B B A B A A A B A B B A B B A A A B B A A A B A B  
B B - B B A B A A B B B B B B A A B A B - - B B A B B  
B B B B B A B A A B B B B B B A A A A B B A B A  
A B B B A A B A A A A A A B A B B A B A A B A A  
A B B B A A B A A A A A A A B A B A B A A B A A  
A B B B B A B B B B B B A A B A B - A B B A A A  
A B - B B A B B B B B B A A B A A B A B - B B A A A  
A B B B B A B B B A A B A A B - B - - B A A A -  
A B - B B A A B B A A B A A B A B - B B A A A -  
B B - B B B B A A A A B B B B A B B B A B A B B  
B B - B B B B A A A A B B B B A B B B A B B B B  
B B - A B B B A B A A B - B A A B B B A B B - B  
A A - A B B A A A A A B A A A B - - B A B - A  
B B B A B B B A B A A B B B A A B B - A B B B B  
- B A A B B B A B A A B A B A A B B A A B B B B

B B B A B B B A A A A B A A A B B B A B A B B B  
B B - A B B B A A A A B A A A B B B A B A B B B  
B A - A B A B A A A A B A A A B B - A A B A B -  
B A B A B A B A A A A B A A A B B B A A B A B B  
B A - A B A B A A A A B A A B B A B B B A B B B  
A B - B B B B A B B B B A A B B B - B A A A B -  
A A - A B B A A B B B B - A B B A - - A A A A A  
B B - A B B A A A B B B A A B B A - A A A A A B  
B A A A A A A A B B B A A A A A A A B A A A B  
B A - A A A A B A B A A A A A A A B B - B - A A B A  
A A - B B B A B A A A A A A A B B B B B A A B B  
B A - A A A A B B B B A B A A A A A B A A A B A B  
A B - A A A A B A B A A A A A A A A A A B B B A B  
B B A A B B A B B B B A A A B B B - B A B A B B  
B A - A B B A B B B B B B B A A A A B B B B A B  
B A A - B B A - B B B B B B B B B B - - A A - -  
B A - A B B A B B B B B B B B B B A A A A A A A  
B A - A B B A B B B B B B B B B B - A A A A A A  
B A A A B B A B B B B B B B B B B A A A A A A  
B A A A B B A B B B B B B B B B B A A A A A A  
B A - A B B A B A A A A - - A A A A A B B B A B  
B A A A B B A B A A A A B B A A A A A B B B A B  
B A A A B B A B A A A A B A A A A A B B B A B  
A A - A A B A B A B B B B A B A B B - B A A A -  
A B A A A B A B A B B A B A B A B B B B A A A  
A B - A A A B B A B B A B - B A B - - B B - B A  
A A - B A A B A B B B B - A A B A - B B B A - A  
A A - B A A B A B B B B A A A B A B B B B A A B  
A A - B A A B A B B B B - A A A A - B B B A A A  
A A - B A B A A B B B A A B A B B B B B A B B  
B B - B B B B - B A A B B B A - A A A A A B B B  
B B A A A A - A A A B A - B A A B B B B A A B

A A - B B B A B B B B B A A B B B B B B A A B B  
B A - B A A B A A A A B A A A B A A A A A A B A A  
B A - B A A B A A A A B A A B B A A B A A B A A  
A B A A B A B B B B B B B - B A B - B B B B A B A  
A B - A B B B B B B B B B B - A B B B B B A A A B  
B A - A A B B B B A A A B B B B A B B B A B B A  
A B - A A B B B B B B B B B B A B B B B A B A B  
B B - B B A A A B A A A B A A B B B A A A A - B -  
B B - B A A A A B A A A A A B A A - - A A A B B  
A A A B A A A B B B B A B A B A B A A A A A B -  
A A - B A A A B B B B A B A B A B A A A A A B A  
A B - B B B A A A A A A B A B B A B B A A A B -  
A B B B A B A A A A A A A A B B A A A A A B B B  
B A A B A B B A A A A A - A B B B - B A A B A -  
B A A B A B B A A A A A A A B B B B B A A B A A  
A A A B A B B B A A A A A A A B B B B A A B A A  
A A A B A B B B A A A A A A A B B B B A A B A A  
A B - B A B B A B B B A - - A A B - - A A B A A  
A A A B A B B A A A A A A A A B B B B - B A A -  
A A A B A B A A A B B B A B B A A B A A A B A A  
B B B A B A A A B B B A B B A A A A A B A A  
A A A B B B B B B B B - A A A A A A B A A A A  
A A A A A B B B B B B B B - - B A A - - B B - A -  
A A A B A B B B B B B B B A B A A - A B B A A -  
A A A B A B B B B B B B B A B A A A A B B A A A  
A A A - - A A B B B B A B A B A - B A A A B B  
A A A A B A A A B B B - A B A A A A B A A A A A  
A A A A B A A A B B B A B A B A B B A A A B -  
A A A A B A A A B B B A B A B A B B A A A B A  
A A A A B A A A B B B A B A B A A B A A A B B  
- - - - - - - - - - - - - - - - - - - - - -  
A B B B B A B A B A A B B B B B - A B B B A A  
B B A A B B A A A A A B A A A B B B A B A B B B  
A B - A B B A B A A A - B A B B B B B A A A A B  
B A B A B A A A B B B B B B A A B B A B B A A  
B B B B B B A A A A B B B B A B B B A B B B B  
B B B A B A A A B B B A B B A A A A B A A



A A B A A A A A B B B - B A A A B A A B A B A B  
B A B A B B A B A A A A B B A A A - - B B B A B  
A A A - A B A B - A A A A - - A B B A B B - A B  
B - B B - B A B B A A A B - B A B B B - B A B B  
A A A B A A B A A A A A B B - A B A B A A A B A A  
A A A A A B A A A A A A A B B B A B B A A B B B  
A A - A A A A A A A A A A - - A A B B A A - A A -  
A A A A B B A A A A A A A A - A A A A A B B B A A  
A A A B A B B B A B B B A B B B A - B B B B B B A A B B  
B A B A B B B B B A A B B - A B B B B A - A A B - B B  
A B B A A A A A A A A A A B A - B B A B B B B A A B  
B B A A A B - B A A A B A B - A A A B A B A - A  
B A A A A A A A A A A A A A - B A A A A A A B A A A  
A B B B B B A B A A A B A B B A A - B A B A B B  
A B B B B B B A A A A B B A B B A B B A A B B B  
B A A B B B B B A B B B A B A A B B B A B B A A  
B - - B B B B B A B B - A B - A B B B A B B A A  
A A A A A A A - A A B A A B A A A A A A A A A A  
A A B B B A A B A B B A - A B A B A B A B A B A  
A B A | A A A A | A A A B | B A A A | A A B B | B A B B | A  
A A A A A A A A A A A A A A A A A A A A A A A  
B A B A B B A B A A A A B B A A B B A B B B A B  
B A A A B A A A B B B A A - B A A A B A A A A B  
B A A B B B B - - - - - A - A A A A A A A A A  
A B - A A A A A A B B B B B B - - - - - - - -  
B A A A B A B B A A A A B A A B B A A B B B A A  
A B B A A B A B A B A B B A B A B B B A B A B  
B A A A B A B A B A A B B A A B B A A A A B B A  
A B B B A B A B B B B A B - A B B B B A B A A B  
A A A B A A A B B B B - B B B A B A A B A A B  
A A - A A - A A A A A A - A A - A A A A - A A A  
B B A - B A B A - A A B A B - B B A B A A - B A  
B A B A B B A B A A A A A B A A A A B B B A B  
B B A B B B B A B A A B B - A A A B A A A B B B  
A A B B A B A A B A A A B A A B B B B B A B B  
B A A B B A B B A B B A B B A - B B B A B B A A  
B B B B B B A B A B B A B B A A A B B A A B A A  
B A A A B B A B - A A A - B A A - A A B B B A B

A A A A A B A A A A A A A A A A A A A A B A A A A  
A B A - B A A B A A A A A A - B B B B B A A A - B  
B A A - B B A B A A A A B B - A A A - B B - A B  
B A B A B B A B A A A A B B A A A B A B B B A B  
B A - - A B A B A A A A - - B A A A A - - B B A B  
B A A A B A A B A A A A A B A A A A A B B B A B  
A A A A B A B B A B B B B A A B A A A B B B B A  
B A A B A B B B A A A B A B A A A B B A B A A B  
B A A A A B A B A A A B A B B A A B B A B A A B  
B B - A A B A B A B B - - A - B B B A B - B - - -  
- - - A A B A B A A A B A - B A A - B A B - A -  
B A A - A B A B A A A B A B B A A - B A B A A B  
B A B A B B B B B B - B B A A B B B B A B A B  
- - B - B A A A - B B B A - - - B - A A - - B B  
B B A A B B A A B B B A A B A B A B A A B A B A

---

| ## | ## | ## | ## | ## | ## | ## | ## | ## | ## | ## | ## | ## | ## |
|----|----|----|----|----|----|----|----|----|----|----|----|----|----|
| B  | B  | A  | B  | A  | B  | A  | A  | A  | A  | B  | A  | B  | A  |
| A  | B  | B  | A  | B  | B  | B  | A  | B  | A  | B  | B  | B  | B  |
| A  | B  | A  | B  | B  | A  | B  | B  | A  | A  | B  | A  | B  | A  |
| A  | B  | A  | B  | B  | B  | B  | B  | A  | B  | B  | B  | A  | A  |
| A  | A  | B  | B  | A  | B  | A  | A  | B  | B  | A  | A  | B  | B  |
| B  | A  | A  | B  | B  | B  | B  | A  | A  | A  | -  | A  | B  | B  |
| B  | A  | B  | A  | B  | -  | A  | A  | B  | B  | -  | A  | B  | A  |
| B  | A  | B  | B  | A  | B  | B  | B  | A  | A  | A  | B  | B  | B  |
| A  | A  | B  | A  | A  | A  | -  | A  | B  | B  | A  | A  | A  | B  |
| B  | B  | A  | A  | B  | -  | B  | A  | A  | A  | B  | A  | B  | B  |
| A  | A  | A  | B  | B  | -  | B  | B  | B  | B  | B  | B  | A  | A  |
| B  | A  | B  | A  | A  | A  | B  | A  | A  | A  | B  | A  | B  | B  |
| A  | A  | B  | B  | B  | B  | B  | B  | A  | B  | A  | A  | A  | B  |
| A  | A  | B  | B  | B  | B  | B  | B  | A  | B  | A  | A  | A  | B  |
| B  | B  | B  | A  | B  | B  | A  | B  | A  | A  | B  | A  | B  | A  |
| B  | A  | B  | A  | B  | A  | A  | B  | B  | A  | B  | A  | A  | A  |
| A  | B  | A  | A  | A  | B  | A  | B  | A  | A  | -  | A  | A  | A  |
| A  | B  | B  | A  | B  | B  | B  | A  | A  | A  | B  | B  | A  | B  |
| A  | -  | A  | A  | A  | A  | B  | B  | B  | B  | A  | A  | A  | A  |
| B  | -  | B  | A  | B  | B  | A  | B  | A  | A  | A  | B  | A  | A  |
| A  | B  | B  | A  | B  | A  | B  | A  | B  | B  | B  | A  | B  | B  |
| A  | B  | B  | A  | B  | A  | B  | B  | A  | A  | A  | A  | A  | B  |
| A  | -  | B  | A  | B  | A  | B  | B  | A  | A  | B  | B  | A  | B  |
| A  | A  | A  | B  | A  | A  | B  | A  | B  | A  | -  | B  | A  | B  |
| B  | B  | A  | B  | A  | A  | A  | B  | A  | B  | B  | B  | A  | B  |
| A  | A  | A  | B  | B  | A  | A  | A  | A  | A  | A  | B  | B  | A  |
| A  | B  | A  | A  | A  | A  | B  | A  | B  | A  | B  | A  | B  | A  |
| A  | B  | B  | B  | B  | B  | B  | A  | B  | B  | B  | B  | B  | A  |
| B  | B  | A  | B  | A  | B  | B  | A  | -  | B  | B  | A  | B  | A  |
| A  | B  | B  | A  | B  | B  | B  | B  | A  | A  | B  | B  | A  | B  |
| B  | B  | A  | A  | A  | A  | B  | B  | B  | A  | B  | B  | A  | A  |
| B  | B  | B  | A  | B  | A  | A  | A  | A  | A  | A  | A  | B  | B  |
| A  | B  | B  | B  | B  | B  | B  | B  | B  | A  | A  | B  | A  | B  |
| A  | A  | -  | -  | B  | -  | A  | A  | A  | A  | A  | -  | B  | A  |
| A  | B  | A  | B  | A  | B  | A  | B  | B  | A  | A  | A  | A  | A  |
| B  | A  | A  | B  | B  | A  | A  | B  | A  | A  | B  | A  | B  | B  |
| A  | A  | A  | B  | A  | A  | B  | A  | B  | A  | B  | B  | A  | B  |

B B A A A A B B A B B A A B  
A B B B B B B A B B B B A B  
A A B A A A A A B B A A A B  
A B B A B A B B A A A B B A  
B B A B A B B B B A A B B B  
A A B A A B A B A B A B B A  
B B A B A B B A A B B B B B  
A A A A B B A A B A A A B A  
B A B A A A B B B B A B - B  
A B B A B B B B A A B B B B  
A B B A B B B B A A B B A B  
A B B B B B A B A A A B A A  
B B A A A A B B A A B B A A  
A B A A A A B B A B A A A A  
A A B B A B B B B A B B A A  
B A B B A B B B A A A B B B  
- B B B B A B A A A A A B  
A A B A A B B A B B A A B A  
A A B B A B B A A B A B B B  
B A A A B A B B A A A A -  
B B A B B A - B A A B A B B  
A B B B B B B A B B B A B  
B B B A B B A B A A B B A  
A B B B B B B B B A A B B B  
B A A A A B B B B B B B A  
A A B B A B B B A B B A A  
A B B A A B B B A B B B A  
A A B B B B A B B A B B A  
A B A - B B B B A B B B A A  
A B B B B A B A A A A A B  
B A A A A A A A A B A A A B  
A B A A A B A B A A A A A  
A B A B B B B B A B B B A A  
B A A B A B A B B A B A A B  
A A B B B B A B B A B A A  
A B B B B A B A A A A A B  
A A B B A B B A B B A A B  
A B B B A A B A B A A A B

B B B A A A B B B B A B A B  
B B A B A A B A A A B B B A  
A A B A B A B B B B B B B B  
B A A B B B A A A A A A B B  
B B B A B A A A A A A A B B  
A B B B A B A A B B A A A A  
B B B B B A A B A A A A B B  
A A B A A B B A B B A A B A  
B B B B A B B B A B B A A B  
A A B B B B B B B A B B A A  
A B B A B B A B A A A A A B  
B B A B A B B A A B B B B B  
B B B B A A B A A B B A B A  
B B B B A B A B B B B B B B  
A A B A A B A B B B B B A A  
A B B B B A B B A B B A B A  
B B A A B B B A A A A A B B  
A A B A A B A B B B B B A A  
B B B B A A A B B A B B A A  
- - - - - - - - - - - - -  
B A B A A A B B B B A B A B  
B A A B B B B B A B B A B B  
B B A B A B B A A B B A B A  
B B B B B A B A B B B A A  
A A A B A B B B B B B A A  
B A B A A A B B B B A B A B  
B B A B A B B A A B B A B A  
A A B A A B A B B B B B A  
B A B A B B B B B A B B A B

A A B B B B B B A B B A B A  
- - - - - - - - - - - - - -  
B B B B B A A B A A B A B B  
A B A B B A A B A B B A B B  
A B B B B A B A A A A A A B  
A A B A B A B B B B B B B B  
A A A B B B A A B A A A B A  
B B A B A B A A A A B A B A  
A B A A A B A B B A B B A A  
B - B A B A A A A A A A B B  
A B B B B B B B A A B A B  
B B A B A A B A A A B B B A  
A A A B A B B B B B B B A A  
A A B B B A B B B A B A A B  
A B - A A A B B A B A A A A  
A B B B B B B B A B A B A B  
B B A B - A A B A A B A B B  
A A B B B B B B A B A A B A  
A A B B B B B B B A B B A B  
B B B B B B B A A B B A A  
A B B B B B B A B A A B A  
B B A A A B B B A B B A A  
A A B A A A A B B A B A A  
B B A A A - B B B B A B - B  
A B A A A A B B A B A A A A  
A B B B A A B A B A A A B  
B A B A - - B B B B A B B B  
A B B B B - A B A A A A B  
B A B A B B B B A A B B A B

B B B B A A A B B A B B A A  
A A B B A B B A A B A B B B  
B B A B A B A A A A B A B A  
B B B A A B A B A A A B B A  
B B B B A B - B B - B A B B  
B B A A A B A A - A B A B A  
A A A A B - A B - A B B B A  
A A A A A - A A A A A B B B  
A A B A A B A A B B A A B B  
A B A B B A A B A B B A B B  
B A A B B - B B A B B A B B  
B A B A B A A B B A B A A A  
A A A B B A B A B A B A A B  
A B A B B B B B A B B B A A  
B B A A - A B B A B B A A B  
A A B B B - A A A B A A A B  
A A A A B A A A A A B A A B  
B B B A A B A B A A A B B A  
B B A B B - B B A B A A B B  
B B A A A A B B A A B B A A  
A A A A A B A A A A A B B B  
A B B B B A B A A A B B B B  
A A A - - - - - B A B A A A  
B B A B B A B B A A - A B A  
A A B A B B A A B A A B B A  
A B B B B - B B B A A A A B  
B A B B B B A A B B A A B A  
A A A A B A A A A - B A A B  
A A A A A B A A A A A B B B  
B B B A A B A B A A A B B A  
A A B A B B B B A A A B A B  
B B A A A A B A B A - A A A  
B B A B A B B B A B B A B A  
A A B A B B B B A A A B A B  
A A B A B B B B A A A B A B  
A A A B B B B B B B B A B  
A A B B A B B A B B A A A A  
A A B A B B A B B B B B A  
B A B B A B B B A A A B B B

B B B B B B A B B A B B B B  
A B B B B A B A A A A A A B  
A A B B B A B B B B B A B B  
A B B B B A B A A A B B B B  
A A B A A - A B B B B B B A  
A B B B B - B A A A A A A B  
B B B A B - A B B B B B B A  
B B B B A - B B A B B A A B  
A - B B A B B B A B A A B A  
B A A B B A B B B A B A A A  
B A A B B A B B B A B A A A  
A B A B B A - A A A B A B A  
A B B A B B A B A A A A A B  
A B B B B A B A B B B B A A  
A B B B A A B A A B B A A B  
A A B B A B B A B B A A A B  
B A B A B A A B A B A B B A  
B B B B A B B B B B B A - B  
A B B B B B A B A A A B A B  
- B B B B B B B A B B A B B  
A B B B B B B A A A A B B B  
A A A A B B A A A A A B B B  
A A A A B B A A A A A B B B  
- - - - - - - - - - - -  
A A B A B B A A B A A B B A  
B B A B A A A A A B - B A A  
B B A B A A A A A A A B A A  
A B B A A B B B A B B B B A  
A B A B B B A B - A A A A A  
B B A A B B B B A B A A B B  
A A B A A B A A B - A A A B  
A B B B B A B A A A A A - B  
A B B B B A B A A A A A B  
- A B B B A A A B A B A B A  
- - - - - - - - - - - -  
A A B B A B A B A A B A A A  
A B B B B B B B A A A A B  
B B B A B - - B A A B A - -  
B A A B B B A A A B A A B B  
A B B A A B B B B B B B A



A B B A A B B B B B B B B A  
B B A A A B A A A A B A B A  
A B B B A B A B B A B A A B  
A B B B B A B A A A A A A B  
B B B B A A A B B A - B A A  
A B B B B B B A B B A B B A  
A A B A A B A B A B A B B A  
A A A A A B A A B B B B B A  
A A B A B B A A B A A B B A  
A A B B B B B B A B B A A A  
A B B B B A B A A A B B B B  
A A B A A B A B A A A B B A  
A A B A A B A B A B A B B A  
A B B B B A B A A A A A A B  
A B B B B A B A A A A A A B  
A A B A A B A A A B B B B A  
B B A A A A A A A B B A A A  
A B B A B A A A A B B A A A  
A A A A A B A A B B B B B A  
A A B B B A A B A A A B B A  
B A A A B A A B B B A A B B  
B B A A A - A A A B A B A A  
A A B A A - A A B - A A A B  
A B B B B - B B A A A A A B  
A B A A B - B A A A A A A B  
- B A A B B B A A A A B B  
A B B B A - B B A B A A B A  
A B A B B B B B A B B B A A  
B B A B B A B B A A A B A  
A B B B B - B A B A B A A A  
A B A B A A B A B A A A B

A A A A A B A B B A A B B A  
- - - - - - - - - - - - -  
A A B B B A A B A A A B B A  
B B B B A B B B A B B A A -  
A A - B B B - B A B B A A A  
A A B B B B B B A B A A A A  
B A A A B A A B B B B A A B  
A A B A B A A B B A B A A A  
A A B B B B A B B A A B B B  
A A B B A - A B A A B A A A  
B B A B B - B B B A B A A A  
B B B A B A A A B A B B  
A B A B B A A B A B A B -  
A A B B A B B A B B A A A B  
B A B B B A A A B A B B  
A A B A B B A A B A A B B A  
A B B B B A B A A A A A B  
A A B A B B B A B B A A A B  
A A B B B B B B - A B A A B A  
A A B B B B B B A B B A A A  
B A B A B B B B A A B A B B  
A A B A A B A B B B B B A  
A A B A A B A B B B B B A  
A A B A A B A B B B B B A  
A A B A A B A B B B B B A

A A B A A B B A B B A A B A  
B B B B A B B A A B B A B A  
B B B B A A B B A B B B A B  
A A A A A B A A B B B B B A  
- - - - - - - - - - - - -  
B B B B A A A B B A B B A A  
B B A A A B B B A B B B A B  
B B B B A A A B B A A B A A  
A A A B B B A A B A A A B A  
A A B A A A A A B B A A A B  
A A B - B A - A A B A A A B  
A A A - B A A A A A A B B A  
A B B B A B A B B A - A A B  
B B B B A B B B A B B A A B  
A A A B A A B A B A A A A B  
B B A A A B B B - B A B B B  
B B A A A B B B B B A A A B B  
A A A B A B B B B B B B B A  
B A A B B A A A A B A A B A  
B B A A A B A A A A B B A B  
A B A - B A A A A A A B B B  
B B B B A A B A A - B B A B  
A A A B A B B B B - B B A A  
A B B B B - B B A B B A B B  
A B A - B B B B A B B B A A  
A B B B B A B - B A B A A A  
A A A A B A A A A A B A A B  
A A B A A A A A B B A A A B  
B B A B B A B B A - A A B A  
B B A B B A B B A A A B A  
B B A A A B A A A - - A B A

A B B B B B B A A A A A B  
A A B A B B A A B A A A B A  
A A B A B B A A B A A B B A  
A A B B A B A B A A B A A A  
A A A B A A A A A A B A A A  
A B B A A A B B B - A B B B  
B B B A B B - - - - B B B B  
A A B A A B A B A B A B B A  
A B B B B A B A B B B B A A  
B B B B - A B B A B B A B  
A B B B B B B B A B B A B B  
B A B A A A B A A A B A B B  
A - - - - - - - - - - -  
A A B B B A A B A A A B B A  
A A B B B A A B A A A B B A  
A B B B B B B B B B B A A  
B A A A A A B B B A B B B  
B A B A B B B B A B B A B A  
A B B A B B B A B A B B B  
B A B B A B A B A A A A A  
B A B B A B A B A A A A A  
B A B B A B A B A A A A A  
B A B B A B A B A A A A A  
B B B B A B A B A B A A A  
A B B A B B A B B B A A A  
A B B B A B B B A B A A B A  
A A B A B B B A B B A A B A  
B B A B A B B A A B B A B A  
B B A B A B A A A B A B B A  
B B A B A B - A A A B A B A  
A B A A A A A B A A A A B A  
B B B B B B B B A A B B B A  
B B B - B A A B B B B B A  
A B B B B A B B B A B A A B  
A B B B B A B B B A A A A B  
A B B B A A B A B A A A A B  
A B A B A A B A B A A A A B  
B B A B A A B A B A A B A B

B B A B A A B A B A A B A B  
B B B A B A A B B A B B A A  
A A B B B B B B B A B B A B  
B B B A B A A B B B B B B A  
A A B B B B B B B B A A A B  
A A B B B B B B A B A A A B  
A A B B B B B B A B B A A A  
B A B - A A B B B B B - B B  
A A B A B A B B B B B B B B  
A A B B B B B B A B A A B A  
- A B A - A - - B - - B - -  
A A B B B A B B A B A B B A  
B B A B A B A A B A B A A B  
A A A A A B A A B B B B B A  
A A B B B B A B A A A B A B  
A A B B B B A B A A A B A B  
A B B B A B A B B A A A A B  
A A B B A B A B B A A A A B  
A A B B B B B B B A B B A B  
B B B B A A A B B A A B A A  
A A B B B A A A A A B B A B  
A A B B B B B B B A B B A B  
A B B B B A B B B B A A A  
B A B B A A A A A A A B B A  
A B B B A B A A B B A A A A  
B B A B A - A A B A B A B B  
A A B B A A A A B B B B B B  
A A B B A - B A B B A A A B  
B A B B B A A A B A B A B B  
A - B B A B B A - B A A A B  
B A B B B A A A - A B A B B  
B A B B B A A A B A B A B B  
B A B B B A A A B A B A B B

B A B A A A B A A A B A B B  
B A B A A A B A A A B A B B  
A B B A B - A B B A A B A A  
A A B A A A A A B A A B A A  
A B B B B B B A B B A A A B  
A A A B A A B A A A B B A B  
A A A B A A B A A A B - A B  
A A A A B A A A A A B A A B  
A A A A B A A A A A B A A B  
A A B B B B A B B A A B B A  
B B A B A B A A A A B A B A  
B B A B B B B B A B A A B B  
B B A B B B B B A B A A B B  
B B B B A B B B A B B A B  
B A A B A B B A A A B - A B  
A B B A B A B B B A A B A B  
B B A B A A A B B A A B B A  
B B B B A - B A A B B B A B  
B B B B A B B B A B B A A B  
A B B A A B A B B A B - B B  
A A B B B A B B B B A B A A  
B B B B A B B B B B A - B  
B B B B A B B B B B A B B  
B B B B A B B B B B A - B  
- B B B A B B B B B A - B  
A A B B A A A A B B B A B B  
A A B B - B B A B B B A B B  
B B B B A B A B B A A A B A  
B B A B B A B A A A A B A  
B B A B B A A B A A A B B A  
A B B A A A A B A A B B B  
B B A B A B A B A A A B A A  
A B A - B B B B A B B B A A  
A B A B B B B B A B B B A A  
B B A B A B B A A B B B B  
B B B B A B B A A B - B B B

A B B A A A B B A B A A A A  
A B B A A B B - B A B B A A  
B B B B B B A B A A B A B B  
B B B A B B A A A A B B B B  
A B B B B A B A A A B B B B  
A B B B B A B A A A B A B B  
B A A A B B - A B B B - A B  
B A A A B B A A B B B A A B  
B A A A B B - A B B B A A B  
B A B A B A A A B B - A B A  
B A B B B A A A B B - A B A  
A B B A B A A A B B A A - A  
A B B A B A A A B B A A B A  
A B B A B A A A B B A A B A  
B B A A A A A A A B A A A B  
B B A A A A A A A B A A A B  
B B A A A A A A A B A A A B  
B B A A A A A A A B A A A B  
A B B A - B B B B B A B A  
A B B A - B B B B B B B A  
A B B A A B B B B B B B A  
A B B B B B B A B B B A B  
A B B B B B B A B B B A B  
B B B A B B - B A A B A B B  
A A A B B B B A B B B A B  
A A A B B B B B B B B A A  
A A A B A B B B B B B B A  
A A A - - B B B B B B - A  
A A A B A B B B B B B B A  
A A A B A B B B B B B B A  
A A B A B B A A B A A B A  
A A B A B B A A B A A B A  
A A B - B B A A B A A B A  
A B B B B - B B A A A A B  
B B B B B B A A B A A B A  
A A A B B B A B B A A B A

A B B B B B B B B A A B A B  
A B B B B B B B B A A B A -  
A B B A A B B B A A A A B B  
A B B A A B B B A A A A B B  
A A B A - B B A A A A B A B  
B A A A A A B B B A B B B A  
B B A A A A B B A B B A B A  
B B A A A A B B A B B - B A  
B A B A B B B B A B B A B A  
A - B B A A A A - - A B B A  
B A B B A A A A B A A B B A  
B A B A B B B A A B B A B A  
A A B A B A A A B B B A B A  
A B A B B A B A B A B A A A  
A B B B B A B A B A B A A A  
A B B A B B A B A A A A A B  
A B B B B B A B A A A A A B  
A A A - A A B A B A A B A B  
A A A B A A B A B A A B A B  
A A A B A A B A B A A B A A  
A A A B A A B A B A A B A B  
A A A B A A B A B A - B A B  
B A A B A A B A B A B B A B  
A B B B B A B A A A A A A B  
A B B B B A B A A A A A A B  
A B B B B A B A A A A A A B  
A B B A B A B A B B A B A  
A B B B A A B A A B B A A B  
B A B A A B B A B B B A B B  
A B B B B - B B B B B - A A  
A B B B B A B B B B B A A A  
A B - B B A B B B B - A A A  
A B B A B A B B A A A B B A  
A A A A B B A B B A B B A  
B B A B A B A A A A B A B A



A B B B B B B A A A B B B A  
A A B A B A A B B A B B B A  
A A B A B A A B B A B A A A  
B B A A A A B B - B A B A B  
B B A A A A B B B B A B B B  
B A A A A A B B B B B B A A A  
A A A B B B B B B B B A A A  
B A A A A B B B B B B B A  
B A B B B B A B A B A B A -  
A A B B B A A A A B A B B B  
A A B B B A A A A B A A A B  
A B A B - A B A B A B A B A  
A B A A A A B A B A B A B A  
B B A B B A A B A B A B B B  
A B A B B A A B A B A B B B  
A B A B B B A A A A A B B A  
A B A B B B A A A A A - B A  
A B B A A B A B B A B B B A  
A B B B B B A A A A A B B A  
- B B B B B - A A A A - B A  
B B A B A B B B B A A B B B  
B B B A A B A A B B B A B B  
B A B A B B B B A A B B A B  
B A B A B B B B A A - B A B  
A A B A B B B B A A B - A B  
A A B A B B B B A A B B A B  
A A B A B B B B A A B B A B  
A A B A A B A A - A B B A -  
A A B A A A - A B A A B A A  
A A B B A B A B A A B A A A  
A A B B A B A B A A B A A A  
A A B B A B A B A A B A A B  
- - - - - - - - - - - -  
A B B A B A B B B A A B A B  
A B B A B B B B B A A B B B  
A B B - B A B A A A B B B B  
A B B B A B A B B A - A A B  
A A B A B B A A B A A B B A  
B B A B A B B B B A A B B B

B B B A A B A B A A A B B A  
A B B B B A B A A A A A A B  
B A - - A B - B A A A A A A  
B B B B B B A B B B A A A A  
A A A B B B A B B A A A B A  
B A A B B B B A B A B A - A  
A - A A A A B A A A A A - -  
A B B B A A B A A A A A A B  
B A A A A B A A A A B B B B  
B B B B A B B B B B A B B  
B A A A A A A A A A A B A -  
B B A A A A A A A A B A B A  
A A B A B A - B B B B B B  
A B A A A A A - - - A A B A  
B A A A A A A A A A A A A  
B A A A A A A A A A A A A  
A A A A A A A A A A A A A  
A B B B B - B A A A A A A B  
A A B A A A A A B B A A A B  
A - A A A B A A A A A A A A  
- - - - - - - - - - - -  
A B B B B B B B A A B B B B  
A B B B A A B A B A A A A B  
A B B B B B B B B A A B B  
B B A B A A B A B A A A A B  
B B A A A A A A B A A A A B  
B B A A B A - A A A - - - A  
A A - A A - A - A A A A A A  
B B A - A A A B B B B A B A  
A B B B B A B A A A - A A B  
A A A A B B A B B A B B A  
A A B A A B A B B B A B B A  
B A B A B B B B - A A B A A  
A B B A A A B B A B A A A A  
A B B B B A - A - A A A A B

|   |   |   |   |   |   |   |   |   |   |   |   |   |   |
|---|---|---|---|---|---|---|---|---|---|---|---|---|---|
| A | B | A | A | A | A | A | A | B | B | B | A | A | B |
| A | B | B | - | B | A | B | A | A | A | B | B | B | B |
| A | B | B | - | B | A | B | A | A | A | A | A | A | B |
| A | B | B | B | B | A | B | A | A | A | A | A | A | B |
| A | B | - | - | B | A | B | A | A | A | - | - | - | - |
| A | B | B | B | B | A | B | A | A | A | A | A | A | B |
| B | B | B | B | A | A | A | B | B | A | B | B | A | A |
| B | A | B | - | A | A | B | B | B | B | A | B | B | B |
| A | A | B | A | B | A | B | B | B | B | B | B | B | B |
| B | A | B | A | B | A | B | B | B | B | B | B | B | B |
| - | B | B | - | - | - | - | - | - | - | - | - | - | - |
| B | A | B | A | B | A | B | B | B | B | - | - | B | B |
| B | A | B | A | B | A | B | B | B | B | B | B | B | B |
| B | B | B | B | A | - | B | A | B | B | B | A | B | B |
| - | B | - | A | B | B | - | - | - | A | A | A | B | - |
| B | B | A | A | B | A | B | A | A | A | B | A | B | B |
